# Supplementary material for: A CLC-ec1 mutant reveals global conformational change and suggests a unifying mechanism for the CLC Cl–/H+ transport cycle
Source: eLife. 2020 Apr 20;9:e53479. doi: 10.7554/eLife.53479 (PMC7253180; doi:10.7554/eLife.53479)
Supplement: Figure 4—source data 1. [file elife-53479-fig4-data1.xlsx]

## Sheet: Sheet1
Source Data for Figure 4
QQQ pH 7.5	Sample	replicate 1	replicate 2	average of replicates		QQQ pH 4.5	Sample	replicate 1	replicate 2	average of replicates
	1	350.47	342.206	346.338			1	347.319	319.33	333.325
	2	328.732	323.109	325.92			2	399.793	348.297	374.045
	3	306.665	280.883	293.774			3	292.157	271.804	281.98
	4	315.593	297.589	306.591			4	294.142	286.837	290.49
	5	352.474	347.451	349.963			5	323.795	316.412	320.104
	6	350.155	364.514	357.334			6	356.611	361.845	359.228
	7	320.169	311.649	315.909			7	333.219	excluded	333.219
	8	304.783	365.192	334.988			8	361.331	310.262	335.796
	9	296.396	295.617	296.006			9	352.22	395.154	373.687
	10	282.79	290.291	286.54			10	418.617	429.91	424.264
	11	297.549	301.65	299.6			11	367.018	359.3	363.159
	12	295.142	300.889	298.015			12	389.348	408.055	398.702
			average of samples	317.582					average of samples	349
N=	12		± SEM	7.0999		N=	12		± SEM	12.0277
E148Q pH 7.5	Sample	replicate 1	replicate 2	average of replicates		E148Q pH 4.5	Sample	replicate 1	replicate 2	average of replicates
	1	168.704	182.356	175.53			1	269.613	263.928	266.77
	2	107.488	148.915	128.201			2	305.419	272.903	289.161
	3	124.121	136.605	130.363			3	329.257	291.09	310.174
	4	109.237	excluded	109.237			4	330.098	313.672	321.885
	5	145.01	120.712	132.861			5	242.639	206.614	224.626
	6	139.828	156.313	148.07			6	304.554	272.81	288.682
	7	129.32	147.293	138.306			7	241.734	204.461	223.097
	8	133.281	151.171	142.226			8	262.641	202.307	232.474
	9	155.563	168.173	161.868			9	327.416	346.405	336.91
	10	139.106	152.762	145.934			10	334.546	361.638	348.092
	11	146.212	93.1779	119.695			11	282.755	192.779	237.767
	12	143.273	173.656	158.465			12	288.401	316.874	302.638
			average of samples	140.896					average of samples	281.856
N=	12		± SEM	5.38077		N=	12		± SEM	12.8193
