# Supplementary material for: A CLC-ec1 mutant reveals global conformational change and suggests a unifying mechanism for the CLC Cl–/H+ transport cycle
Source: eLife. 2020 Apr 20;9:e53479. doi: 10.7554/eLife.53479 (PMC7253180; doi:10.7554/eLife.53479)
Supplement: Figure 5—source data 1. [file elife-53479-fig5-data1.xlsx]

## Sheet: QQQ-1ots (WT)
Res. #	35	36	37	38	39	40	41	42	43	44	45	46	47	48	49	50	51	52	53	54	55	56	57	58	59	60	61	62	63	64	65	66	67	68	69				75	76	77	78	79	80	81	82	83	84	85
35	0	0.0431124	0.119168	0.00814458	0.166106	0.235811	0.109018	0.0386911	0.0954624	0.218462	0.10239	0.0472478	0.0323273	0.322908	0.240955	0.0571474	0.177279	0.164218	0.204694	0.299203	0.313989	0.0896262	0.302825	0.450904	0.40834	0.277445	0.516102	0.678163	0.112371	0.543617	0.864501	0.524043	0.0850112	0.605589	0.43761				0.0903216	0.688579	0.759218	0.42969	0.222469	1.05499	1.11812	0.796517	1.02185	0.893761	1.01714
36	0.0431124	0	0.0525956	0.175041	0.203649	0.316421	0.0855731	0.120893	0.169853	0.370968	0.275334	0.132142	0.193068	0.548224	0.467489	0.242309	0.366515	0.371163	0.40456	0.47586	0.475818	0.272245	0.515552	0.657556	0.604197	0.503249	0.739314	0.883469	0.330199	0.772361	1.08875	0.760553	0.352902	0.913591	0.703077				0.280473	0.875677	0.995153	0.67087	0.456373	1.32162	1.44831	1.09696	1.29304	1.20072	1.3219
37	0.119168	0.0525956	0	0.105032	0.115183	0.37564	0.151357	0.191775	0.172219	0.409145	0.282029	0.168127	0.237752	0.647344	0.571498	0.370671	0.502498	0.480131	0.513585	0.570579	0.572584	0.326018	0.565837	0.731817	0.660874	0.518344	0.755884	0.933288	0.33782	0.757162	1.05546	0.716092	0.247645	0.803209	0.639307				0.286573	0.887995	1.01279	0.635905	0.418261	1.33227	1.44282	1.05014	1.27441	1.20515	1.31719
38	0.00814458	0.175041	0.105032	0	0.0454234	0.246739	0.102033	0.0105666	0.0255935	0.185645	0.06795	0.0846291	0.0209198	0.325702	0.273415	0.0885461	0.200539	0.18617	0.232259	0.291222	0.311907	0.0678881	0.271546	0.425669	0.38213	0.227967	0.449642	0.637982	0.0554314	0.464214	0.753503	0.419183	0.0529435	0.449619	0.313836				0.00655197	0.618409	0.714484	0.328477	0.111196	1.01575	1.08482	0.701758	0.956248	0.880043	0.988999
39	0.166106	0.203649	0.115183	0.0454234	0	0.0311091	0.228511	0.129243	0.0647519	0.063988	0.0183909	0.116816	0.102686	0.197859	0.183222	0.0230391	0.0489911	0.0660893	0.147012	0.205913	0.190846	0.00832616	0.254823	0.367506	0.320378	0.240007	0.464795	0.595119	0.0578271	0.509213	0.804744	0.47569	0.0871811	0.616159	0.40391				0.0277671	0.642706	0.753789	0.411009	0.205926	1.09488	1.20483	0.840174	1.07299	0.998953	1.10066
40	0.235811	0.316421	0.37564	0.246739	0.0311091	0	0.0293155	0.107076	0.139588	0.0819156	0.0706246	0.0237869	0.077218	0.332618	0.341207	0.10614	0.160418	0.179148	0.261539	0.270155	0.233129	0.0478648	0.316387	0.42825	0.35826	0.279964	0.496568	0.628865	0.0767758	0.521755	0.790361	0.461879	0.0606154	0.614309	0.396535				0.0206158	0.643731	0.798134	0.417866	0.210583	1.1647	1.31197	0.892368	1.13023	1.10666	1.19655
41	0.109018	0.0855731	0.151357	0.102033	0.228511	0.0293155	0	0.00449558	0.1138	0.196483	0.0825631	0.072175	0.0176198	0.43707	0.400717	0.195545	0.312813	0.303656	0.340506	0.361544	0.390987	0.134477	0.338305	0.501033	0.457445	0.293747	0.497096	0.706066	0.119512	0.508936	0.772694	0.4583	0.0226155	0.476606	0.351808				0.0322599	0.647308	0.786599	0.361776	0.128266	1.10014	1.20824	0.760489	1.01718	1.00254	1.10117
42	0.0386911	0.120893	0.191775	0.0105666	0.129243	0.107076	0.00449558	0	0.0589792	0.233002	0.204872	0.0790865	0.0262203	0.297417	0.293644	0.0818999	0.173598	0.195771	0.251853	0.290785	0.330208	0.114977	0.299108	0.43151	0.422305	0.290136	0.479766	0.66705	0.126792	0.529355	0.800959	0.502147	0.0740751	0.538476	0.39089				0.0351398	0.651907	0.773274	0.384287	0.148448	1.08388	1.18599	0.77133	1.02265	0.991828	1.09723
43	0.0954624	0.169853	0.172219	0.0255935	0.0647519	0.139588	0.1138	0.0589792	0	0.00142334	0.108471	0.108897	0.0171533	0.237615	0.342353	0.15808	0.13686	0.163751	0.312546	0.341821	0.275382	0.123805	0.416736	0.496904	0.429363	0.394053	0.611309	0.711988	0.190194	0.658516	0.930777	0.609076	0.258984	0.792906	0.546127				0.152048	0.776683	0.923499	0.566403	0.361926	1.30451	1.45927	1.05308	1.2895	1.26667	1.35167
44	0.218462	0.370968	0.409145	0.185645	0.063988	0.0819156	0.196483	0.233002	0.00142334	0	0.00984316	0.0348453	0.108242	0.285766	0.357342	0.179737	0.168623	0.140373	0.264301	0.256347	0.192524	0.0215012	0.265089	0.380743	0.290219	0.202015	0.412567	0.559326	0.00938213	0.42343	0.671639	0.351712	0.0626127	0.470624	0.273773				0.0739615	0.552043	0.723146	0.307293	0.0945192	1.10133	1.26221	0.79377	1.05085	1.07435	1.14923
45	0.10239	0.275334	0.282029	0.06795	0.0183909	0.0706246	0.0825631	0.204872	0.108471	0.00984316	0	0.0410137	0.0624655	0.160831	0.362003	0.232668	0.198077	0.161828	0.309419	0.303952	0.284562	0.0349106	0.262404	0.385765	0.329587	0.19265	0.389014	0.577015	0.00108986	0.405194	0.643097	0.324839	0.131362	0.335252	0.205763				0.0545211	0.579062	0.712207	0.265702	0.0453626	1.05212	1.15028	0.677663	0.977203	0.994252	1.06684
46	0.0472478	0.132142	0.168127	0.0846291	0.116816	0.0237869	0.072175	0.0790865	0.108897	0.0348453	0.0410137	0	0.058956	0.0488833	0.200066	0.154851	0.141	0.122541	0.275306	0.355688	0.34594	0.134135	0.367446	0.482923	0.452007	0.356782	0.556721	0.717183	0.188887	0.61251	0.8891	0.598642	0.213869	0.672221	0.495164				0.10908	0.720621	0.85196	0.477754	0.241836	1.1911	1.32499	0.899613	1.14365	1.13464	1.23034
47	0.0323273	0.193068	0.237752	0.0209198	0.102686	0.077218	0.0176198	0.0262203	0.0171533	0.108242	0.0624655	0.058956	0	0.0145031	0.23541	0.228923	0.14647	0.100299	0.281676	0.34556	0.259075	0.0670313	0.388278	0.498829	0.411005	0.364458	0.578745	0.70342	0.171801	0.61802	0.891433	0.602705	0.252177	0.772249	0.53679				0.0847847	0.691886	0.874933	0.505993	0.276519	1.26281	1.47105	1.01554	1.22748	1.25798	1.34301
48	0.322908	0.548224	0.647344	0.325702	0.197859	0.332618	0.43707	0.297417	0.237615	0.285766	0.160831	0.0488833	0.0145031	0	0.0477198	0.0108632	0.0201285	0.17045	0.0815006	0.0759993	0.0658152	0.376044	0.135613	0.0447872	0.00898045	0.168652	0.00988267	0.245341	0.328435	0.0368688	0.281166	0.0292181	0.416057	0.0497147	0.0752348				0.471773	0.134965	0.334038	0.115582	0.372051	0.684177	0.876532	0.33779	0.587957	0.680715	0.75635
49	0.240955	0.467489	0.571498	0.273415	0.183222	0.341207	0.400717	0.293644	0.342353	0.357342	0.362003	0.200066	0.23541	0.0477198	0	0.0454264	0.0791059	0.0386208	0.0453121	0.0276427	0.159611	0.184192	0.0778783	0.120322	0.157102	0.0559024	0.085816	0.366808	0.171744	0.153731	0.407193	0.190248	0.257894	0.116095	0.0391191				0.371745	0.229584	0.395862	0.0419056	0.327847	0.697397	0.851933	0.330598	0.585573	0.664058	0.760291
50	0.0571474	0.242309	0.370671	0.0885461	0.0230391	0.10614	0.195545	0.0818999	0.15808	0.179737	0.232668	0.154851	0.228923	0.0108632	0.0454264	0	0.0550272	0.130222	0.165388	0.236965	0.339319	0.147627	0.289377	0.41016	0.466676	0.373971	0.488363	0.687106	0.237876	0.600919	0.861987	0.675509	0.35187	0.742829	0.551844				0.0360526	0.555967	0.765534	0.402413	0.103287	1.10692	1.35587	0.86367	1.04231	1.13331	1.25391
51	0.177279	0.366515	0.502498	0.200539	0.0489911	0.160418	0.312813	0.173598	0.13686	0.168623	0.198077	0.141	0.14647	0.0201285	0.0791059	0.0550272	0	0.0625839	0.0324921	0.0532132	0.0861972	0.120094	0.0612637	0.214049	0.251121	0.151123	0.245379	0.478784	0.0119057	0.350102	0.578292	0.421179	0.0815985	0.500304	0.315207				0.282647	0.313519	0.581944	0.166118	0.136845	0.949027	1.25538	0.67795	0.855457	1.02507	1.12255
52	0.164218	0.371163	0.480131	0.18617	0.0660893	0.179148	0.303656	0.195771	0.163751	0.140373	0.161828	0.122541	0.100299	0.17045	0.0386208	0.130222	0.0625839	0	0.0296009	0.0671141	0.155258	0.229284	0.12128	0.0774439	0.160642	0.0483817	0.031228	0.35728	0.153666	0.139002	0.33395	0.175386	0.252815	0.0904798	0.0245602				0.393487	0.219347	0.449384	0.0502011	0.355668	0.7733	0.994746	0.360175	0.624043	0.818696	0.891825
53	0.204694	0.40456	0.513585	0.232259	0.147012	0.261539	0.340506	0.251853	0.312546	0.264301	0.309419	0.275306	0.281676	0.0815006	0.0453121	0.165388	0.0324921	0.0296009	0	0.0381391	0.319075	0.0769473	0.0170992	0.139669	0.312419	0.139336	0.166611	0.463508	0.0404918	0.327191	0.543145	0.417331	0.0645464	0.329799	0.231419				0.292271	0.310853	0.517173	0.0859418	0.242273	0.832085	1.05837	0.479946	0.716693	0.88733	0.994612
54	0.299203	0.47586	0.570579	0.291222	0.205913	0.270155	0.361544	0.290785	0.341821	0.256347	0.303952	0.355688	0.34556	0.0759993	0.0276427	0.236965	0.0532132	0.0671141	0.0381391	0	0.0391496	0.0105577	0.166025	0.180476	0.241076	0.256717	0.311677	0.462664	0.0851023	0.448812	0.674142	0.539218	0.304957	0.655247	0.405519				0.253129	0.346722	0.604781	0.236998	0.0639613	1.00958	1.34402	0.796651	0.966177	1.14822	1.25038
55	0.313989	0.475818	0.572584	0.311907	0.190846	0.233129	0.390987	0.330208	0.275382	0.192524	0.284562	0.34594	0.259075	0.0658152	0.159611	0.339319	0.0861972	0.155258	0.319075	0.0391496	0	0.0546921	0.143474	0.0874278	0.19572	0.195681	0.145386	0.360206	0.0238508	0.297899	0.404939	0.302385	0.0335507	0.356749	0.158861				0.360868	0.276949	0.584846	0.0950591	0.198914	1.00464	1.35339	0.66763	0.904566	1.20274	1.26917
56	0.0896262	0.272245	0.326018	0.0678881	0.00832616	0.0478648	0.134477	0.114977	0.123805	0.0215012	0.0349106	0.134135	0.0670313	0.376044	0.184192	0.147627	0.120094	0.229284	0.0769473	0.0105577	0.0546921	0	0.0306092	0.0554214	0.231762	0.160694	0.139563	0.435434	0.0113941	0.329483	0.440001	0.309778	0.0304801	0.207023	0.130987				0.182325	0.46071	0.686765	0.148664	0.144612	1.05429	1.28407	0.578801	0.90547	1.18775	1.23619
57	0.302825	0.515552	0.565837	0.271546	0.254823	0.316387	0.338305	0.299108	0.416736	0.265089	0.262404	0.367446	0.388278	0.135613	0.0778783	0.289377	0.0612637	0.12128	0.0170992	0.166025	0.143474	0.0306092	0	0.0780561	0.148655	0.127337	0.178445	0.394192	0.00819293	0.331749	0.573612	0.46367	0.207364	0.426374	0.267359				0.295722	0.288822	0.48975	0.0975908	0.215492	0.873836	1.16069	0.577935	0.798045	1.00281	1.09012
58	0.450904	0.657556	0.731817	0.425669	0.367506	0.42825	0.501033	0.43151	0.496904	0.380743	0.385765	0.482923	0.498829	0.0447872	0.120322	0.41016	0.214049	0.0774439	0.139669	0.180476	0.0874278	0.0554214	0.0780561	0	0.0314679	0.123146	0.0554552	0.272639	0.0558963	0.22009	0.429052	0.414546	0.220362	0.485147	0.238232				0.506499	0.0725719	0.381925	0.0134597	0.333506	0.820701	1.25746	0.612432	0.745028	1.04374	1.11897
59	0.40834	0.604197	0.660874	0.38213	0.320378	0.35826	0.457445	0.422305	0.429363	0.290219	0.329587	0.452007	0.411005	0.00898045	0.157102	0.466676	0.251121	0.160642	0.312419	0.241076	0.19572	0.231762	0.148655	0.0314679	0	0.053976	0.136836	0.181317	0.225157	0.0364304	0.0729617	0.0575163	0.216807	0.0171985	0.120633				0.500486	0.128023	0.430222	0.13376	0.415588	0.860795	1.22256	0.419071	0.70834	1.10867	1.12896
60	0.277445	0.503249	0.518344	0.227967	0.240007	0.279964	0.293747	0.290136	0.394053	0.202015	0.19265	0.356782	0.364458	0.168652	0.0559024	0.373971	0.151123	0.0483817	0.139336	0.256717	0.195681	0.160694	0.127337	0.123146	0.053976	0	0.0342432	0.373121	0.0775368	0.187261	0.340556	0.272305	0.0589921	0.0337769	0.0311938				0.253336	0.33906	0.521906	0.000482566	0.284675	0.917398	1.17242	0.416721	0.751872	1.079	1.10114
61	0.516102	0.739314	0.755884	0.449642	0.464795	0.496568	0.497096	0.479766	0.611309	0.412567	0.389014	0.556721	0.578745	0.00988267	0.085816	0.488363	0.245379	0.031228	0.166611	0.311677	0.145386	0.139563	0.178445	0.0554552	0.136836	0.0342432	0	0.0194445	0.14844	0.130169	0.424721	0.386195	0.291157	0.400997	0.149427				0.488224	0.0723788	0.291814	0.0755136	0.356476	0.782952	1.19187	0.578836	0.741898	1.02592	1.04531
62	0.678163	0.883469	0.933288	0.637982	0.595119	0.628865	0.706066	0.66705	0.711988	0.559326	0.577015	0.717183	0.70342	0.245341	0.366808	0.687106	0.478784	0.35728	0.463508	0.462664	0.360206	0.435434	0.394192	0.272639	0.181317	0.373121	0.0194445	0	0.0475062	0.0292969	0.0809697	0.194242	0.114561	0.135166	0.10691				0.723239	0.117174	0.247474	0.25641	0.522651	0.767458	1.29473	0.488338	0.667767	1.13952	1.14016
63	0.112371	0.330199	0.33782	0.0554314	0.0578271	0.0767758	0.119512	0.126792	0.190194	0.00938213	0.00108986	0.188887	0.171801	0.328435	0.171744	0.237876	0.0119057	0.153666	0.0404918	0.0851023	0.0238508	0.0113941	0.00819293	0.0558963	0.225157	0.0775368	0.14844	0.0475062	0	0.0769246	0.0169407	0.183594	0.0600352	0.0932479	0.00328077				0.0845535	0.501752	0.770214	0.119305	0.147645	1.1607	1.51498	0.531797	0.844351	1.32771	1.20301
64	0.543617	0.772361	0.757162	0.464214	0.509213	0.521755	0.508936	0.529355	0.658516	0.42343	0.405194	0.61251	0.61802	0.0368688	0.153731	0.600919	0.350102	0.139002	0.327191	0.448812	0.297899	0.329483	0.331749	0.22009	0.0364304	0.187261	0.130169	0.0292969	0.0769246	0	0.0743663	0.188933	0.16174	0.180536	0.159114				0.355436	0.211949	0.363656	0.149307	0.343682	0.903546	1.27641	0.44313	0.770643	1.18531	1.07405
65	0.864501	1.08875	1.05546	0.753503	0.804744	0.790361	0.772694	0.800959	0.930777	0.671639	0.643097	0.8891	0.891433	0.281166	0.407193	0.861987	0.578292	0.33395	0.543145	0.674142	0.404939	0.440001	0.573612	0.429052	0.0729617	0.340556	0.424721	0.0809697	0.0169407	0.0743663	0	0.080342	0.395369	0.327691	0.245868				0.623909	0.0592818	0.152978	0.202336	0.242388	0.882313	1.38098	0.836394	0.9215	1.23084	1.05621
66	0.524043	0.760553	0.716092	0.419183	0.47569	0.461879	0.4583	0.502147	0.609076	0.351712	0.324839	0.598642	0.602705	0.0292181	0.190248	0.675509	0.421179	0.175386	0.417331	0.539218	0.302385	0.309778	0.46367	0.414546	0.0575163	0.272305	0.386195	0.194242	0.183594	0.188933	0.080342	0	0.0835923	0.0538983	0.147106				0.0298654	0.455954	0.685289	0.184004	0.1111	1.22981	1.61964	0.84153	1.01388	1.3752	1.10497
67	0.0850112	0.352902	0.247645	0.0529435	0.0871811	0.0606154	0.0226155	0.0740751	0.258984	0.0626127	0.131362	0.213869	0.252177	0.416057	0.257894	0.35187	0.0815985	0.252815	0.0645464	0.304957	0.0335507	0.0304801	0.207364	0.220362	0.216807	0.0589921	0.291157	0.114561	0.0600352	0.16174	0.395369	0.0835923	0	0.0385418	0.298677				0.976333	1.34465	1.38018	0.909367	0.806643	1.76263	1.90521	1.0584	1.26894	1.45037	0.888504
68	0.605589	0.913591	0.803209	0.449619	0.616159	0.614309	0.476606	0.538476	0.792906	0.470624	0.335252	0.672221	0.772249	0.0497147	0.116095	0.742829	0.500304	0.0904798	0.329799	0.655247	0.356749	0.207023	0.426374	0.485147	0.0171985	0.0337769	0.400997	0.135166	0.0932479	0.180536	0.327691	0.0538983	0.0385418	0	0.0502605				0.294066	0.411049	0.149365	0.0852415	0.286766	0.797819	0.835506	0.590322	0.635202	0.589418	0.0869822
69	0.43761	0.703077	0.639307	0.313836	0.40391	0.396535	0.351808	0.39089	0.546127	0.273773	0.205763	0.495164	0.53679	0.0752348	0.0391191	0.551844	0.315207	0.0245602	0.231419	0.405519	0.158861	0.130987	0.267359	0.238232	0.120633	0.0311938	0.149427	0.10691	0.00328077	0.159114	0.245868	0.147106	0.298677	0.0502605	0				0.197512	0.389381	0.505066	0.183229	0.214564	0.95351	1.17969	0.572081	0.650549	0.922191	0.463279
75	0.0903216	0.280473	0.286573	0.00655197	0.0277671	0.0206158	0.0322599	0.0351398	0.152048	0.0739615	0.0545211	0.10908	0.0847847	0.471773	0.371745	0.0360526	0.282647	0.393487	0.292271	0.253129	0.360868	0.182325	0.295722	0.506499	0.500486	0.253336	0.488224	0.723239	0.0845535	0.355436	0.623909	0.0298654	0.976333	0.294066	0.197512				0	0.0481728	0.169194	0.193736	0.101598	0.330172	0.401336	0.0530016	0.0362709	0.496328	0.0796903
76	0.688579	0.875677	0.887995	0.618409	0.642706	0.643731	0.647308	0.651907	0.776683	0.552043	0.579062	0.720621	0.691886	0.134965	0.229584	0.555967	0.313519	0.219347	0.310853	0.346722	0.276949	0.46071	0.288822	0.0725719	0.128023	0.33906	0.0723788	0.117174	0.501752	0.211949	0.0592818	0.455954	1.34465	0.411049	0.389381				0.0481728	0	0.0483102	0.359228	0.295516	0.29818	0.304679	0.0751638	0.119128	0.688058	0.185618
77	0.759218	0.995153	1.01279	0.714484	0.753789	0.798134	0.786599	0.773274	0.923499	0.723146	0.712207	0.85196	0.874933	0.334038	0.395862	0.765534	0.581944	0.449384	0.517173	0.604781	0.584846	0.686765	0.48975	0.381925	0.430222	0.521906	0.291814	0.247474	0.770214	0.363656	0.152978	0.685289	1.38018	0.149365	0.505066				0.169194	0.0483102	0	0.0381746	0.283812	0.0315089	0.0465147	0.259183	0.170071	0.448796	0.0322949
78	0.42969	0.67087	0.635905	0.328477	0.411009	0.417866	0.361776	0.384287	0.566403	0.307293	0.265702	0.477754	0.505993	0.115582	0.0419056	0.402413	0.166118	0.0502011	0.0859418	0.236998	0.0950591	0.148664	0.0975908	0.0134597	0.13376	0.000482566	0.0755136	0.25641	0.119305	0.149307	0.202336	0.184004	0.909367	0.0852415	0.183229				0.193736	0.359228	0.0381746	0	0.0283818	0.552036	0.37679	0.0801866	0.107454	0.463801	0.139601
79	0.222469	0.456373	0.418261	0.111196	0.205926	0.210583	0.128266	0.148448	0.361926	0.0945192	0.0453626	0.241836	0.276519	0.372051	0.327847	0.103287	0.136845	0.355668	0.242273	0.0639613	0.198914	0.144612	0.215492	0.333506	0.415588	0.284675	0.356476	0.522651	0.147645	0.343682	0.242388	0.1111	0.806643	0.286766	0.214564				0.101598	0.295516	0.283812	0.0283818	0	0.0467926	0.186805	0.373952	0.260844	0.0338625	0.533287
80	1.05499	1.32162	1.33227	1.01575	1.09488	1.1647	1.10014	1.08388	1.30451	1.10133	1.05212	1.1911	1.26281	0.684177	0.697397	1.10692	0.949027	0.7733	0.832085	1.00958	1.00464	1.05429	0.873836	0.820701	0.860795	0.917398	0.782952	0.767458	1.1607	0.903546	0.882313	1.22981	1.76263	0.797819	0.95351				0.330172	0.29818	0.0315089	0.552036	0.0467926	0	0.0647377	0.105894	0.0568464	0.415185	0.160661
81	1.11812	1.44831	1.44282	1.08482	1.20483	1.31197	1.20824	1.18599	1.45927	1.26221	1.15028	1.32499	1.47105	0.876532	0.851933	1.35587	1.25538	0.994746	1.05837	1.34402	1.35339	1.28407	1.16069	1.25746	1.22256	1.17242	1.19187	1.29473	1.51498	1.27641	1.38098	1.61964	1.90521	0.835506	1.17969				0.401336	0.304679	0.0465147	0.37679	0.186805	0.0647377	0	0.0367361	0.139285	0.0311973	0.00143906
82	0.796517	1.09696	1.05014	0.701758	0.840174	0.892368	0.760489	0.77133	1.05308	0.79377	0.677663	0.899613	1.01554	0.33779	0.330598	0.86367	0.67795	0.360175	0.479946	0.796651	0.66763	0.578801	0.577935	0.612432	0.419071	0.416721	0.578836	0.488338	0.531797	0.44313	0.836394	0.84153	1.0584	0.590322	0.572081				0.0530016	0.0751638	0.259183	0.0801866	0.373952	0.105894	0.0367361	0	0.0363327	0.0232927	0.405881
83	1.02185	1.29304	1.27441	0.956248	1.07299	1.13023	1.01718	1.02265	1.2895	1.05085	0.977203	1.14365	1.22748	0.587957	0.585573	1.04231	0.855457	0.624043	0.716693	0.966177	0.904566	0.90547	0.798045	0.745028	0.70834	0.751872	0.741898	0.667767	0.844351	0.770643	0.9215	1.01388	1.26894	0.635202	0.650549				0.0362709	0.119128	0.170071	0.107454	0.260844	0.0568464	0.139285	0.0363327	0	0.0250481	0.0772916
84	0.893761	1.20072	1.20515	0.880043	0.998953	1.10666	1.00254	0.991828	1.26667	1.07435	0.994252	1.13464	1.25798	0.680715	0.664058	1.13331	1.02507	0.818696	0.88733	1.14822	1.20274	1.18775	1.00281	1.04374	1.10867	1.079	1.02592	1.13952	1.32771	1.18531	1.23084	1.3752	1.45037	0.589418	0.922191				0.496328	0.688058	0.448796	0.463801	0.0338625	0.415185	0.0311973	0.0232927	0.0250481	0	0.029575
85	1.01714	1.3219	1.31719	0.988999	1.10066	1.19655	1.10117	1.09723	1.35167	1.14923	1.06684	1.23034	1.34301	0.75635	0.760291	1.25391	1.12255	0.891825	0.994612	1.25038	1.26917	1.23619	1.09012	1.11897	1.12896	1.10114	1.04531	1.14016	1.20301	1.07405	1.05621	1.10497	0.888504	0.0869822	0.463279				0.0796903	0.185618	0.0322949	0.139601	0.533287	0.160661	0.00143906	0.405881	0.0772916	0.029575	0
86	0.863651	1.14989	1.1385	0.81563	0.93534	1.01484	0.896922	0.897571	1.17791	0.955332	0.870727	1.03222	1.13897	0.508602	0.491008	0.977534	0.812598	0.562016	0.66309	0.962447	0.927087	0.881401	0.791639	0.783807	0.748303	0.73263	0.784913	0.783182	0.732068	0.754589	0.970613	0.925276	0.817495	0.391665	0.484432				0.137333	0.180447	0.0339385	0.0223718	0.398511	0.213447	0.171534	0.0538908	0.140542	0.0531644	0.0700407
87	0.794415	1.07534	1.08038	0.778976	0.898985	0.995683	0.880254	0.880311	1.16354	0.962808	0.900817	1.02001	1.12133	0.537295	0.517269	0.957135	0.824708	0.639185	0.715074	0.973465	1.02216	1.02449	0.833869	0.823434	0.912592	0.884573	0.832789	0.921281	0.981903	0.951928	1.07974	1.11431	1.06568	0.510104	0.699644				0.261291	0.574547	0.359287	0.319596	0.042704	0.370771	0.119581	0.0382653	0.224855	0.0497735	0.153347
88	0.438823	0.748447	0.76298	0.457201	0.579365	0.711198	0.606633	0.600373	0.879233	0.712731	0.64417	0.754045	0.886571	0.360318	0.340846	0.806519	0.73895	0.5697	0.643179	0.907752	1.05	1.03418	0.789769	0.873663	1.03603	0.937374	0.862984	1.11515	1.14607	1.05796	1.13393	1.18539	0.94555	0.360113	0.754214				0.573704	0.947513	0.778565	0.49312	0.103786	0.719958	0.363404	0.0443785	0.34083	0.329298	0.334842
89	0.43884	0.736349	0.757409	0.4503	0.554055	0.681138	0.587327	0.574031	0.840183	0.676905	0.612964	0.716806	0.839973	0.310134	0.288508	0.750148	0.668134	0.49443	0.575952	0.843362	0.975494	0.958622	0.7251	0.789416	0.943624	0.837765	0.757846	1.00771	0.893398	0.872569	1.00918	0.991219	0.649602	0.282711	0.559744				0.224698	0.648454	0.565794	0.258643	0.132028	0.627727	0.478928	0.063793	0.361005	0.38319	0.498795
90	0.693545	0.977921	0.995928	0.699297	0.821816	0.939072	0.814558	0.809205	1.11406	0.932672	0.871249	0.966268	1.08145	0.518343	0.476183	0.907115	0.795228	0.621095	0.695436	0.979764	1.05441	1.0353	0.849062	0.845883	0.95705	0.874459	0.849984	0.985334	0.868348	0.919392	1.1279	1.07638	0.85802	0.550801	0.680979				0.190597	0.571374	0.439245	0.319018	0.0412762	0.497062	0.374437	0.211167	0.395931	0.234192	0.427222
91	0.693316	0.974598	0.97225	0.701202	0.847437	0.955429	0.814804	0.839917	1.1404	0.94279	0.891773	0.989278	1.08508	0.538396	0.522795	0.950753	0.834318	0.677645	0.77646	1.01931	1.10886	1.08931	0.861338	0.864577	0.990968	0.865182	0.825511	0.999658	0.895326	0.896689	1.05873	1.00598	0.74011	0.345515	0.597129				0.385524	0.777289	0.541601	0.371099	0.0730945	0.5067	0.16146	0.0756065	0.348983	0.0983105	0.235561
92	0.4002	0.683161	0.696557	0.430813	0.550875	0.677261	0.568301	0.583582	0.845482	0.680999	0.644176	0.716025	0.809326	0.327548	0.326287	0.739945	0.658349	0.538501	0.633784	0.833768	0.993181	0.970415	0.675599	0.726301	0.911313	0.712822	0.64383	0.931436	0.759693	0.741992	0.884525	0.828652	0.426584	0.099586	0.423414				0.314362	0.77914	0.624979	0.27206	0.0566113	0.602787	0.281395	0.0188805	0.334768	0.239924	0.310241
93	0.346062	0.632607	0.65283	0.378361	0.510671	0.647295	0.515849	0.523056	0.83296	0.672776	0.624502	0.691753	0.810874	0.311178	0.272791	0.691856	0.619645	0.486773	0.58256	0.847378	0.984041	0.943573	0.731502	0.77709	0.934758	0.776219	0.780018	1.01052	0.778035	0.887326	1.10542	0.997885	0.65486	0.487664	0.653358				0.375584	0.841931	0.722299	0.461095	0.13797	0.77744	0.592384	0.345179	0.625971	0.487202	0.626035
94	0.718368	0.963889	0.973624	0.734504	0.869587	0.970336	0.822143	0.848728	1.14606	0.954534	0.927894	0.970686	1.03218	0.517985	0.483955	0.820235	0.700235	0.581627	0.644097	0.856214	0.955283	0.914235	0.662553	0.661073	0.814968	0.651433	0.622465	0.812447	0.639494	0.707756	0.925515	0.845247	0.572469	0.331659	0.481689				0.163213	0.591655	0.408383	0.248421	0.0510478	0.4021	0.169138	0.0719725	0.296383	0.0669074	0.245709
95	0.52803	0.795732	0.81017	0.581187	0.723668	0.853358	0.713763	0.744662	1.03069	0.869718	0.848477	0.876131	0.955811	0.508923	0.493582	0.834236	0.762848	0.676636	0.747751	0.931795	1.0946	1.05445	0.761391	0.799571	0.991891	0.785085	0.736936	0.997542	0.817641	0.836155	1.00536	0.929246	0.565042	0.264158	0.540549				0.422918	0.869555	0.659182	0.392947	0.0947841	0.580313	0.231058	0.0912883	0.382395	0.171303	0.31822
96	0.368709	0.639345	0.68817	0.462014	0.569409	0.733412	0.626647	0.631189	0.887775	0.78053	0.778899	0.746873	0.828668	0.469098	0.448659	0.727176	0.703413	0.669099	0.704009	0.840858	1.06762	1.00815	0.663352	0.74057	0.97765	0.709754	0.647323	0.97991	0.733622	0.758927	0.934999	0.85549	0.413872	0.200903	0.473578				0.297645	0.783013	0.660073	0.313338	0.025177	0.611153	0.353563	0.0857345	0.379143	0.259593	0.415487
97	0.490741	0.726593	0.780458	0.57617	0.683065	0.826877	0.703081	0.711609	0.985311	0.86448	0.875802	0.820136	0.87714	0.502333	0.459427	0.676351	0.635608	0.606101	0.618731	0.771927	0.966627	0.911159	0.611874	0.659349	0.886408	0.673677	0.631733	0.901593	0.677773	0.769612	0.979936	0.892539	0.548654	0.389715	0.548848				0.247587	0.727571	0.607764	0.355141	0.029889	0.593229	0.39957	0.206964	0.445219	0.289025	0.475342
98	0.416067	0.654864	0.690092	0.50049	0.643549	0.782085	0.629003	0.65639	0.959151	0.825598	0.825268	0.787251	0.862333	0.479266	0.437932	0.680959	0.64847	0.612429	0.643513	0.825692	1.01635	0.97997	0.707548	0.749584	0.974775	0.799101	0.769581	1.0131	0.844998	0.934551	1.13237	1.04914	0.753858	0.531509	0.718818				0.543533	1.00365	0.801188	0.583168	0.295326	0.72318	0.424862	0.328609	0.574381	0.348371	0.515586
99	0.302648	0.557592	0.591915	0.411017	0.551849	0.708948	0.56842	0.599764	0.873452	0.761959	0.765119	0.714178	0.792879	0.466951	0.444865	0.68665	0.678754	0.658415	0.691336	0.83892	1.06483	1.00556	0.696247	0.769966	1.00839	0.770301	0.728757	1.03547	0.828373	0.870329	1.03939	0.951245	0.552216	0.303608	0.589833				0.548234	1.02701	0.822284	0.503811	0.207959	0.702694	0.340424	0.183593	0.480893	0.283357	0.430406
109	0.662302	0.738794	0.823643	0.683497	0.745464	0.790831	0.652283	0.640594	0.946149	0.812375	0.841655	0.718376	0.701867	0.399437	0.288225	0.171698	0.165329	0.219842	0.154945	0.305922	0.412996	0.3954	0.366212	0.360312	0.525541	0.523608	0.592514	0.667665	0.445563	0.797828	1.11225	0.964041	0.848524	1.0889	0.830578				0.111964	0.626477	0.678063	0.590653	0.325063	0.917745	1.05432	0.897949	0.989607	0.85887	1.0398
110	0.703989	0.788948	0.820266	0.674985	0.800165	0.831303	0.60773	0.601364	0.957632	0.795634	0.765904	0.64202	0.67337	0.336748	0.183802	0.132021	0.134243	0.130435	0.0620545	0.270789	0.366976	0.312998	0.275069	0.29673	0.44154	0.412327	0.508462	0.586824	0.359515	0.698044	1.04445	0.888403	0.769712	0.98489	0.757001				0.0894035	0.564166	0.5413	0.511765	0.268852	0.728538	0.799451	0.732961	0.805007	0.591395	0.782498
111	0.222202	0.309013	0.355189	0.240839	0.352475	0.414382	0.217729	0.228002	0.55791	0.434648	0.450544	0.302312	0.335177	0.0780392	0.0248797	0.0589828	0.0298876	0.00841134	0.00573849	0.184643	0.313811	0.274397	0.241213	0.269765	0.434155	0.400302	0.500262	0.610465	0.359645	0.715328	1.02469	0.840547	0.672021	0.868394	0.700427				0.236926	0.770663	0.717342	0.580802	0.348869	0.889564	0.867913	0.740033	0.911841	0.710329	0.856131
112	0.312449	0.341473	0.436237	0.366384	0.410819	0.465328	0.326689	0.328541	0.586784	0.50848	0.575372	0.361806	0.3411	0.197926	0.118763	0.0471654	0.00367121	0.1059	0.0790453	0.195046	0.335221	0.307749	0.288853	0.305982	0.479192	0.450201	0.531498	0.647625	0.376736	0.744366	1.03268	0.847877	0.66133	0.907225	0.709416				0.180534	0.744049	0.763238	0.582915	0.332217	0.979039	1.02725	0.82628	0.999861	0.865103	1.01761
113	0.685063	0.646613	0.720096	0.672473	0.72094	0.716501	0.548399	0.538996	0.784692	0.688801	0.725827	0.498341	0.462615	0.308628	0.194252	0.0224378	0.0153976	0.112294	0.0470381	0.152469	0.278175	0.261842	0.236361	0.236283	0.410023	0.398786	0.469489	0.556338	0.319903	0.684377	0.987552	0.821888	0.686644	0.942933	0.697167				0.0565699	0.591687	0.620478	0.512942	0.266422	0.84105	0.931647	0.783713	0.901119	0.750189	0.924805
114	0.572193	0.54743	0.623122	0.595579	0.657416	0.683441	0.502332	0.499666	0.748641	0.671869	0.709783	0.468529	0.454649	0.315487	0.203173	0.0255344	0.0733974	0.162894	0.101999	0.2168	0.366181	0.336657	0.270281	0.284342	0.475493	0.429464	0.490182	0.609075	0.371643	0.706453	1.00088	0.838287	0.671896	0.868599	0.68638				0.132683	0.663391	0.644392	0.523339	0.2752	0.807602	0.82796	0.702134	0.840184	0.661524	0.84201
115	0.481343	0.469249	0.547685	0.531277	0.586061	0.632759	0.442716	0.436598	0.665053	0.614281	0.64198	0.361125	0.361235	0.290652	0.172858	0.0169898	0.062944	0.144485	0.0829494	0.192631	0.352454	0.274229	0.215529	0.267507	0.442079	0.346131	0.423813	0.585709	0.279836	0.608585	0.901392	0.714565	0.463298	0.682313	0.546454				0.0558627	0.607343	0.597094	0.408241	0.150286	0.759088	0.762326	0.582572	0.75473	0.590941	0.768878
116	0.459985	0.379489	0.448229	0.454558	0.504495	0.512633	0.310989	0.297333	0.525421	0.488797	0.508598	0.231112	0.230429	0.205084	0.0915157	0.139227	0.0559274	0.0388038	0.00478237	0.100179	0.226614	0.165326	0.177287	0.217501	0.362517	0.312901	0.420215	0.540047	0.227666	0.607331	0.91482	0.706694	0.489466	0.788536	0.583546				0.0553136	0.61507	0.628717	0.458787	0.221343	0.841413	0.887362	0.707957	0.866285	0.702372	0.866808
117	0.347609	0.270323	0.360021	0.408706	0.48754	0.515655	0.327999	0.345694	0.594143	0.569645	0.615568	0.375646	0.379383	0.3452	0.257249	0.0578405	0.126346	0.234521	0.213532	0.323881	0.451369	0.422884	0.42908	0.449844	0.610219	0.585366	0.687844	0.789953	0.516097	0.900137	1.20586	1.00336	0.824257	1.09605	0.88831				0.389258	0.938918	0.917052	0.779803	0.555316	1.1019	1.11381	0.98358	1.13542	0.938343	1.10239
127	0.0931277	0.290891	0.356528	0.18411	0.240153	0.391674	0.283815	0.282127	0.492772	0.4203	0.460785	0.286735	0.319974	0.111044	0.0570639	0.133935	0.168885	0.190745	0.179084	0.293179	0.512871	0.37503	0.181193	0.293057	0.495459	0.2663	0.30597	0.600139	0.239304	0.456271	0.68794	0.51917	0.105369	0.182127	0.257979				0.0112707	0.586853	0.556873	0.186139	0.112589	0.65693	0.543962	0.213008	0.512746	0.43017	0.558936
128	0.244272	0.453629	0.509868	0.309636	0.336508	0.480456	0.398452	0.395569	0.546104	0.46194	0.494043	0.318143	0.322348	0.104218	0.0477305	0.14003	0.153901	0.122552	0.10241	0.205129	0.400427	0.16584	0.0078955	0.164644	0.313473	0.0281421	0.106459	0.426785	0.0262833	0.200896	0.444185	0.247094	0.236862	0.0837079	0.00720675				0.248927	0.337755	0.348511	0.0686193	0.362159	0.497646	0.428001	0.0308886	0.347663	0.303759	0.417013
129	0.232733	0.483802	0.530102	0.305631	0.355581	0.515446	0.44424	0.442456	0.599935	0.516855	0.526896	0.429484	0.46475	0.213042	0.207201	0.402525	0.391017	0.350473	0.363193	0.43078	0.645098	0.405722	0.157945	0.327773	0.484137	0.121323	0.177174	0.552126	0.0819602	0.231635	0.454061	0.271345	0.292303	0.212775	0.0299962				0.178045	0.392478	0.379753	0.0848075	0.388898	0.482043	0.351574	0.0741651	0.27618	0.243228	0.342943
130	0.456065	0.661109	0.692798	0.490837	0.545214	0.650379	0.558757	0.576258	0.744802	0.59923	0.620872	0.546784	0.530694	0.16794	0.142241	0.338054	0.256323	0.188559	0.191986	0.29595	0.471364	0.291985	0.00493088	0.123718	0.297238	0.0168548	0.00788431	0.338365	0.0450584	0.0943984	0.321497	0.170049	0.302252	0.301614	0.143148				0.338053	0.221397	0.168352	0.231631	0.532592	0.255751	0.0960614	0.262602	0.0775096	0.00800282	0.10862
131	0.454914	0.642348	0.672071	0.460011	0.515436	0.596312	0.495375	0.514534	0.717581	0.543639	0.564914	0.522637	0.493156	0.0630874	0.00842858	0.205068	0.0958175	0.00904525	0.00353783	0.17371	0.309903	0.144293	0.0538459	0.0484954	0.205356	0.0151365	0.0422088	0.303548	0.0608938	0.172563	0.430758	0.265948	0.103263	0.0108587	0.0115688				0.314925	0.254548	0.242726	0.0963919	0.386753	0.413286	0.356525	0.00994503	0.310065	0.251402	0.358006
132	0.424815	0.648305	0.684091	0.435856	0.474989	0.577653	0.514003	0.520023	0.697297	0.543775	0.554616	0.561649	0.551392	0.106627	0.0961762	0.396649	0.244225	0.111368	0.174427	0.306655	0.421704	0.170027	0.00808815	0.139265	0.249323	0.0347839	0.0566934	0.359257	0.0999626	0.137585	0.396372	0.21151	0.235935	0.0818667	0.0396596				0.341911	0.237441	0.272427	0.131097	0.424396	0.483321	0.472656	0.0356389	0.356401	0.359176	0.451153
133	0.417295	0.667484	0.696617	0.43768	0.493023	0.608152	0.547836	0.552738	0.730318	0.583069	0.576447	0.610695	0.639538	0.203319	0.229663	0.587675	0.460511	0.349021	0.465376	0.544256	0.689301	0.515399	0.202824	0.325149	0.455052	0.0909763	0.13427	0.491659	0.0360966	0.170251	0.400854	0.243239	0.281362	0.237468	0.0701817				0.274314	0.285666	0.286709	0.161999	0.469033	0.442699	0.355684	0.113771	0.251448	0.269214	0.340791
134	0.686548	0.897528	0.918646	0.684473	0.746094	0.822176	0.739912	0.760597	0.951182	0.760799	0.772916	0.799362	0.778959	0.280464	0.286545	0.581505	0.394032	0.274307	0.333718	0.445495	0.53562	0.413505	0.0850936	0.136486	0.282622	0.0085182	0.0158227	0.27666	0.0613227	0.0530159	0.29327	0.176584	0.226982	0.276756	0.153991				0.460385	0.0792714	0.0371803	0.315301	0.62677	0.171923	0.0638489	0.307463	0.0240748	0.0120131	0.0746684
135	0.420239	0.62655	0.643128	0.387768	0.451597	0.513553	0.424706	0.435092	0.662935	0.458785	0.449919	0.516853	0.52816	0.0334861	0.0632586	0.282103	0.0837033	0.0754477	0.0290031	0.228359	0.275564	0.168511	0.00384168	0.0598443	0.184458	0.0528279	0.121921	0.31686	0.00834206	0.277572	0.55194	0.402036	0.134393	0.220697	0.168509				0.239871	0.320505	0.330555	0.0315036	0.257125	0.576795	0.592742	0.228362	0.522868	0.504472	0.585421
136	0.70689	0.926632	0.957898	0.688448	0.717145	0.786673	0.752164	0.750334	0.911407	0.727835	0.73236	0.818184	0.811096	0.266654	0.313403	0.687031	0.433295	0.267923	0.413243	0.498221	0.49872	0.374387	0.0281774	0.0668379	0.155712	0.159247	0.137474	0.169598	0.233879	0.0613865	0.199433	0.0854978	0.296095	0.2333	0.202814				0.608728	0.0400952	0.02507	0.369775	0.680817	0.293341	0.356519	0.1527	0.184673	0.288893	0.354972
137	0.760764	0.986847	0.996067	0.730471	0.793742	0.853257	0.787125	0.804283	0.995079	0.783982	0.77575	0.880796	0.885156	0.31645	0.358027	0.752653	0.517864	0.35047	0.487985	0.620983	0.62029	0.583967	0.302617	0.236575	0.315325	0.0684203	0.0158596	0.263807	0.042168	0.0281551	0.267998	0.182087	0.178477	0.286952	0.173705				0.526979	0.00653455	0.0127012	0.371833	0.685738	0.201679	0.151678	0.306806	0.0731909	0.134718	0.166428
138	0.645508	0.871639	0.884936	0.606922	0.687735	0.751698	0.653469	0.654234	0.907246	0.69574	0.664027	0.760057	0.804421	0.204847	0.179457	0.555465	0.351944	0.172442	0.232915	0.486386	0.4803	0.443053	0.272262	0.227831	0.320523	0.239573	0.242308	0.365686	0.18447	0.357342	0.640964	0.557986	0.39438	0.326176	0.269765				0.296384	0.19184	0.170855	0.016303	0.340582	0.397411	0.436971	0.14385	0.376009	0.344286	0.439017
139	0.897095	1.11471	1.18631	0.895699	0.911773	1.00185	0.969648	0.919629	1.13304	0.985782	0.97821	1.03545	1.08328	0.537524	0.511929	0.808794	0.610049	0.486059	0.500524	0.697722	0.678772	0.683509	0.527833	0.358126	0.488506	0.433232	0.305911	0.424651	0.262562	0.398541	0.667775	0.655998	0.51769	0.508843	0.337648				0.590047	0.0981809	0.0539405	0.126447	0.525657	0.345731	0.642162	0.259357	0.353962	0.487277	0.681415
140	0.735716	0.971309	1.0367	0.73187	0.737295	0.832084	0.824151	0.769681	0.942851	0.804515	0.788621	0.861099	0.917024	0.395626	0.397705	0.74468	0.577683	0.43707	0.476055	0.653343	0.692934	0.719305	0.548296	0.389853	0.516468	0.433571	0.189004	0.430005	0.208416	0.259174	0.504598	0.529963	0.292791	0.227154	0.166356				0.625408	0.108435	0.0584905	0.257793	0.665524	0.362308	0.653976	0.086707	0.271439	0.518079	0.67154
141	0.938257	1.16272	1.19262	0.901999	0.943384	1.00166	0.958783	0.942139	1.13544	0.940143	0.924382	1.03492	1.06349	0.482766	0.506288	0.874223	0.650596	0.49072	0.574302	0.736001	0.691083	0.743179	0.584405	0.396781	0.457341	0.487008	0.285779	0.324975	0.281315	0.29037	0.480774	0.519351	0.430954	0.173887	0.104886				0.695423	0.210012	0.127035	0.356512	0.760125	0.185969	0.415768	0.0696748	0.172595	0.41556	0.540095
148	0.835157	0.934976	1.04848	0.845473	0.817011	0.85714	0.844366	0.806985	1.02452	0.890889	0.954082	0.946982	0.885717	0.462037	0.422002	0.308583	0.14633	0.223819	0.152044	0.199217	0.249103	0.295021	0.297525	0.206959	0.369625	0.442665	0.460983	0.482774	0.296703	0.65942	0.936298	0.821962	0.760468	1.05472	0.693632				0.207614	0.339705	0.531906	0.402957	0.111912	0.89442	1.20243	0.923634	0.994912	1.01285	1.1789
149	0.0704855	0.0500241	0.227154	0.0502406	0.0142601	0.15652	0.178135	0.117213	0.37362	0.374453	0.506679	0.418055	0.460315	0.215619	0.220365	0.186924	0.204267	0.381446	0.440137	0.592863	0.720658	0.844919	0.911783	0.825379	1.02048	1.14588	1.20913	1.22636	1.06093	1.46925	1.73642	1.58856	1.53497	1.78155	1.47323				0.757022	1.31013	1.4243	1.28352	1.0001	1.72171	1.91645	1.67813	1.79393	1.7403	1.89507
150	0.373363	0.540775	0.6967	0.479226	0.442914	0.594312	0.601413	0.533976	0.757069	0.723352	0.823286	0.730153	0.730957	0.419802	0.390197	0.371328	0.332595	0.433449	0.390803	0.480079	0.653334	0.643504	0.512371	0.502752	0.729383	0.668236	0.653573	0.821678	0.572915	0.855595	1.10874	1.00478	0.800743	0.967668	0.79526				0.0705049	0.621045	0.756147	0.526258	0.180868	1.00178	1.19371	0.850389	0.987421	1.00983	1.20156
151	0.494029	0.665052	0.737973	0.491503	0.499931	0.583009	0.510501	0.478167	0.740764	0.585807	0.590656	0.58976	0.558645	0.109187	0.0115166	0.0645066	0.0881531	0.115389	0.202225	0.00478689	0.101759	0.0421287	0.00114544	0.0856663	0.182261	0.111565	0.230985	0.379137	0.00438686	0.372458	0.682289	0.494309	0.238927	0.566502	0.355996				0.265417	0.301981	0.423755	0.170438	0.109745	0.735148	0.91357	0.566491	0.735188	0.715695	0.852523
152	0.379102	0.479828	0.544416	0.357326	0.374159	0.412801	0.310947	0.293981	0.566903	0.410038	0.441558	0.346865	0.298664	0.00270763	0.0860408	0.250098	0.214206	0.148809	0.168268	0.0161201	0.0697758	0.0130054	0.09983	0.130987	0.235254	0.235166	0.363497	0.452547	0.123605	0.536222	0.843681	0.636511	0.441975	0.793226	0.531441				0.0708912	0.504124	0.601362	0.389529	0.139491	0.917721	1.07206	0.786658	0.952882	0.885577	1.01478
153	0.183483	0.312891	0.400142	0.230697	0.261152	0.36137	0.258882	0.246852	0.52319	0.421913	0.484327	0.343837	0.334335	0.092721	0.0218304	0.0480615	0.00709351	0.0559078	0.0515137	0.203739	0.337478	0.266505	0.265272	0.310977	0.459008	0.40044	0.497753	0.643541	0.315761	0.679639	0.965222	0.769723	0.525104	0.785503	0.616251				0.110045	0.686293	0.738607	0.493321	0.224803	0.984915	1.05831	0.773739	0.976482	0.894091	1.03377
154	0.185305	0.334669	0.414654	0.223455	0.214014	0.322496	0.257307	0.243318	0.434208	0.339451	0.416959	0.23783	0.196457	0.0212552	0.089064	0.143089	0.0887905	0.0429743	0.0459949	0.0756909	0.230879	0.0954344	0.0790896	0.167053	0.30604	0.183004	0.278714	0.484288	0.0909203	0.432458	0.693805	0.488221	0.156804	0.421872	0.313398				0.106116	0.495382	0.568211	0.231544	0.0452922	0.818161	0.87895	0.505977	0.760742	0.731824	0.85264
155	0.10843	0.235331	0.254096	0.0599412	0.0912365	0.143042	0.00200364	0.00518669	0.281459	0.118423	0.129418	0.0367961	0.018272	0.179797	0.220102	0.279272	0.217246	0.189795	0.0954444	0.0512795	0.102035	0.037067	0.116636	0.195579	0.238526	0.176779	0.353495	0.48915	0.0453264	0.471012	0.76203	0.492068	0.175955	0.563815	0.376958				0.0218189	0.586843	0.660591	0.346796	0.1169	0.969963	1.05014	0.706832	0.954277	0.886982	0.988515
156	0.191292	0.280379	0.304083	0.164847	0.221395	0.27073	0.0748641	0.0766733	0.34937	0.225876	0.226233	0.0166065	0.0111227	0.0855499	0.172687	0.292305	0.207698	0.1708	0.146117	0.00526009	0.0899032	0.0450234	0.0360866	0.120453	0.203176	0.116522	0.270998	0.424477	0.0078485	0.405396	0.702342	0.448714	0.133829	0.478445	0.31684				0.0867664	0.510935	0.552287	0.264666	0.0288264	0.816459	0.858545	0.560897	0.798003	0.693462	0.812667
157	0.197024	0.354271	0.404231	0.258795	0.312421	0.434493	0.269845	0.28599	0.497482	0.417342	0.430662	0.165187	0.194343	0.106154	0.0124906	0.0554821	0.0286801	0.0362111	0.0254936	0.151906	0.296563	0.101339	0.0875118	0.212902	0.321997	0.138136	0.264448	0.497446	0.0498627	0.374024	0.654093	0.417366	0.0121665	0.28147	0.228478				0.108334	0.481956	0.504317	0.165481	0.0984017	0.705217	0.693591	0.368301	0.630502	0.534763	0.667899
158	0.166887	0.368032	0.392619	0.203978	0.260665	0.399574	0.2281	0.279204	0.451374	0.366619	0.340614	0.0687662	0.128786	0.100612	0.0317969	0.00921982	0.0685978	0.0301481	0.062542	0.178918	0.277197	0.0210957	0.0897799	0.242184	0.285468	0.0848649	0.254269	0.491051	0.0332483	0.314936	0.597014	0.321736	0.136885	0.207798	0.150636				0.143496	0.457808	0.506686	0.125152	0.124532	0.746984	0.757603	0.385098	0.665084	0.592315	0.707289
159	0.095147	0.214528	0.221783	0.0948917	0.145839	0.242468	0.00097245	0.0086409	0.226057	0.185506	0.145072	0.146799	0.0687668	0.0226571	0.030902	0.16343	0.0676472	0.0505701	0.00696127	0.0906578	0.171909	0.0262639	0.0825723	0.203982	0.246444	0.103433	0.278407	0.471391	0.0263516	0.360604	0.645776	0.358889	0.0515336	0.331147	0.217074				0.101976	0.509164	0.560787	0.206948	0.0264699	0.821449	0.845719	0.501222	0.768182	0.677937	0.792262
160	0.0911586	0.0556923	0.0775747	0.00470805	0.0917648	0.231151	0.00935429	0.049763	0.259085	0.250166	0.24821	0.0142981	0.047942	0.12617	0.0821139	0.0265988	0.0700438	0.103344	0.133803	0.226027	0.347796	0.158638	0.198327	0.319586	0.401745	0.228774	0.378766	0.600416	0.121867	0.473103	0.746561	0.471171	0.0386087	0.352946	0.296909				0.0403113	0.648846	0.660061	0.297025	0.0559088	0.864802	0.825023	0.504006	0.788148	0.673563	0.796282
161	0.023897	0.197958	0.205637	0.0843473	0.125867	0.278067	0.0863395	0.100374	0.211055	0.20384	0.153606	0.123971	0.0478525	0.039497	0.0148267	0.0813669	0.0183311	0.0136583	0.0277597	0.104327	0.24262	0.00872041	0.00109989	0.156167	0.229505	0.0134319	0.132326	0.407346	0.118172	0.189275	0.444515	0.16656	0.348068	0.0558546	0.0387359				0.218522	0.394137	0.407988	0.0184801	0.267243	0.59434	0.526154	0.156271	0.4764	0.389492	0.500397
162	0.197257	0.339275	0.247643	0.152415	0.219052	0.294373	0.0132265	0.075933	0.144815	0.0951654	0.0486804	0.217085	0.147708	0.0143635	0.0462393	0.104475	0.0331999	0.0854723	0.0214523	0.0568448	0.117576	0.162743	0.0528344	0.105492	0.100071	0.122128	0.0754581	0.313725	0.271105	0.0855609	0.352581	0.0218655	0.509378	0.126397	0.153754				0.30461	0.317217	0.341074	0.0890946	0.304733	0.580589	0.5316	0.160233	0.488892	0.392772	0.488315
163	0.0534474	0.0560142	0.0810492	0.124653	0.0636826	0.126009	0.222754	0.101266	0.0639845	0.0352456	0.0491287	0.209811	0.14877	0.00666513	0.0299522	0.112291	0.0375494	0.0529144	0.0189757	0.105085	0.168308	0.0656045	0.044584	0.180092	0.192161	0.00496628	0.201295	0.41369	0.138403	0.238223	0.513084	0.179467	0.313318	0.0652942	0.0133298				0.139465	0.484536	0.483385	0.0852528	0.121072	0.713223	0.644965	0.318507	0.638562	0.506713	0.608595
164	0.0158655	0.163787	0.0920131	0.0517231	0.166247	0.283267	0.00698688	0.0662506	0.185095	0.176377	0.0849497	0.125469	0.0538365	0.0667179	0.00925111	0.0546426	0.0417768	0.0172799	0.0413256	0.125215	0.240985	0.0245464	0.000641858	0.160798	0.207399	0.0496318	0.117355	0.387941	0.166499	0.142634	0.405421	0.0951082	0.457108	0.156251	0.119331				0.225875	0.384426	0.358474	0.065805	0.292974	0.525383	0.405742	0.0795349	0.411614	0.275553	0.390868
174	0.191395	0.353617	0.245984	0.261384	0.629775	0.657442	0.241484	0.374037	0.729219	0.655454	0.53553	0.406062	0.51541	0.542318	0.436057	0.374727	0.469473	0.416184	0.459581	0.643419	0.688644	0.457406	0.593781	0.740194	0.738473	0.579634	0.814662	0.987501	0.457466	0.860503	1.21466	0.889148	0.462023	0.871707	0.759595				0.449603	1.01108	0.978416	0.719445	0.511054	1.19214	1.15872	0.951708	1.16846	0.943212	1.09691
175	0.395702	0.595698	0.505117	0.430347	0.828428	0.867944	0.405935	0.461563	0.933341	0.843873	0.659692	0.521169	0.688504	0.649414	0.465496	0.406368	0.532113	0.44876	0.447144	0.688055	0.732257	0.490161	0.635614	0.801146	0.793576	0.643345	0.893484	1.05354	0.539405	0.944336	1.34429	1.04169	0.655878	1.0893	0.938319				0.483166	1.00094	0.981153	0.800658	0.578234	1.19497	1.21958	1.0556	1.19607	0.947797	1.13129
176	0.400927	0.635325	0.651853	0.603744	0.97858	1.0268	0.61854	0.6285	1.04457	1.03638	0.85974	0.657984	0.819419	0.896046	0.701485	0.546888	0.707605	0.66412	0.626975	0.819093	0.88246	0.650607	0.796598	0.965232	0.971384	0.82635	1.05312	1.2248	0.716996	1.11435	1.49772	1.21907	0.838556	1.29955	1.12704				0.581	1.10708	1.1582	0.953254	0.702942	1.39535	1.4942	1.26608	1.38401	1.20089	1.38954
177	0.227828	0.374698	0.50716	0.505516	0.646754	0.732003	0.475717	0.472587	0.690135	0.743101	0.664563	0.348177	0.432892	0.607509	0.468052	0.233243	0.386353	0.412552	0.374589	0.482429	0.581671	0.380413	0.481082	0.622319	0.672121	0.524797	0.699455	0.892902	0.406119	0.783	1.10576	0.843074	0.452212	0.867384	0.720645				0.237179	0.808351	0.886866	0.602397	0.34276	1.13281	1.22234	0.91732	1.09495	0.982394	1.1463
178	0.275659	0.388116	0.478142	0.41965	0.549554	0.639928	0.405771	0.426174	0.718841	0.682107	0.64962	0.383398	0.438122	0.474301	0.351694	0.159566	0.279907	0.311523	0.285396	0.415569	0.518721	0.350362	0.423968	0.538388	0.612849	0.488666	0.649193	0.823494	0.381344	0.758398	1.08198	0.833089	0.486825	0.857289	0.702331				0.213313	0.779119	0.831419	0.579178	0.323346	1.0667	1.13685	0.868673	1.04574	0.914405	1.07904
179	0.0502818	0.0990588	0.201882	0.149547	0.270542	0.344331	0.148014	0.174807	0.533267	0.497903	0.499164	0.338228	0.385175	0.402206	0.332174	0.151382	0.23536	0.292595	0.328165	0.467888	0.511752	0.409001	0.575053	0.647589	0.690535	0.661847	0.853755	0.948244	0.539183	0.984795	1.32191	1.05522	0.796245	1.23779	0.985043				0.454796	1.02373	1.08965	0.883806	0.658693	1.38059	1.49192	1.24987	1.40452	1.26228	1.40526
180	0.154107	0.0733987	0.072254	0.0138952	0.0488238	0.207861	0.0654902	0.105993	0.509025	0.49128	0.489567	0.37678	0.43002	0.51237	0.469762	0.288372	0.367891	0.410832	0.471914	0.597081	0.6076	0.480154	0.699758	0.788879	0.789946	0.756787	0.968737	1.06676	0.612604	1.06976	1.40176	1.11768	0.826798	1.319	1.05985				0.535506	1.11399	1.2162	0.972188	0.745679	1.53699	1.68121	1.38751	1.54698	1.43879	1.57203
181	0.168605	0.0074052	0.139683	0.0254403	0.0147512	0.218416	0.116384	0.119075	0.541844	0.519706	0.565143	0.425858	0.45044	0.491913	0.462446	0.286163	0.372313	0.421118	0.464805	0.578166	0.632389	0.48328	0.640878	0.739637	0.775958	0.699074	0.878004	1.0215	0.56591	0.981894	1.29316	1.03106	0.705125	1.1344	0.931172				0.429473	1.01283	1.11583	0.834462	0.583057	1.40974	1.53804	1.21005	1.39108	1.3119	1.45206
182	0.096428	0.178982	0.253568	0.0986955	0.133705	0.202725	0.0642828	0.0418124	0.389032	0.297008	0.317945	0.178696	0.203136	0.0999372	0.0433714	0.122021	0.0512327	0.0175904	0.0640917	0.213387	0.25586	0.175406	0.345828	0.400092	0.450497	0.447403	0.627435	0.709236	0.322696	0.770764	1.09544	0.843177	0.612159	1.03732	0.769191				0.22008	0.79758	0.884427	0.666559	0.437012	1.20239	1.33942	1.06658	1.23173	1.12789	1.2553
183	0.202966	0.267629	0.384597	0.227012	0.222748	0.293243	0.20769	0.160701	0.489434	0.443206	0.444106	0.333125	0.369341	0.304868	0.235112	0.0147263	0.0813622	0.157493	0.1836	0.31377	0.324965	0.260681	0.476855	0.529041	0.552467	0.581716	0.771275	0.822668	0.444939	0.906668	1.24599	1.00405	0.808823	1.29727	0.967869				0.296291	0.856263	0.994686	0.811735	0.578313	1.34712	1.56467	1.28809	1.39522	1.31101	1.4469
184	0.0465374	0.0796707	0.210488	0.0147145	0.091042	0.0576988	0.0365995	0.0548683	0.280926	0.316799	0.301002	0.226277	0.350558	0.318775	0.267612	0.0974602	0.184142	0.219497	0.27408	0.417363	0.408141	0.284045	0.540935	0.637605	0.618718	0.608409	0.819621	0.907706	0.462172	0.916558	1.25082	0.992842	0.729569	1.24199	0.950088				0.328081	0.896006	1.05388	0.811116	0.568301	1.41088	1.63378	1.2958	1.4219	1.36984	1.49813
185	0.0945859	0.184366	0.230918	0.0308619	0.00315334	0.0137059	0.0350391	0.0515056	0.169138	0.0370096	0.096719	0.0523707	0.00183243	0.188932	0.153681	0.325667	0.295204	0.187609	0.0576061	0.0745741	0.0591887	0.0124819	0.271164	0.297673	0.306627	0.356651	0.551077	0.597537	0.200717	0.682288	0.987381	0.722293	0.508732	0.974257	0.666525				0.126972	0.725802	0.85501	0.60015	0.381624	1.23422	1.41772	1.08551	1.26974	1.22229	1.3203
186	0.156148	0.216498	0.272313	0.0784097	0.0503006	0.0351042	0.00124973	0.0307878	0.180407	0.0655609	0.119408	0.0959015	0.0573568	0.1721	0.162269	0.35313	0.36804	0.237267	0.144304	0.0116673	0.0419184	0.0118582	0.272966	0.262404	0.272202	0.403985	0.607463	0.581262	0.257109	0.766855	1.09918	0.851782	0.740785	1.24319	0.845195				0.180005	0.75257	0.897802	0.728364	0.523003	1.30738	1.5474	1.27233	1.39074	1.32334	1.41983
187	0.165232	0.210852	0.310299	0.129168	0.0410152	0.0284168	0.0951112	0.0638163	0.188532	0.162011	0.247792	0.271259	0.247156	0.123441	0.177358	9.44431e-05	0.0578271	0.0653751	0.178609	0.268783	0.177242	0.197899	0.53335	0.536474	0.495984	0.627735	0.836689	0.807213	0.453473	0.960834	1.28325	1.0361	0.909063	1.46953	1.04895				0.325379	0.895268	1.09858	0.910956	0.697438	1.53366	1.83595	1.51521	1.60395	1.57893	1.67996
188	0.282739	0.220086	0.162531	0.348917	0.443388	0.496709	0.37619	0.358603	0.3485	0.401225	0.204796	0.0711015	0.172484	0.24429	0.0230773	0.0708861	0.0711775	0.0606571	0.359369	0.540521	0.342093	0.339468	0.797805	0.825541	0.700365	0.836696	1.10025	1.07216	0.643309	1.18196	1.49735	1.20229	1.02267	1.60319	1.21143				0.622861	1.2112	1.40204	1.15171	0.94875	1.84574	2.11816	1.75319	1.88488	1.87004	1.94882
189	0.213135	0.109664	0.154184	0.400327	0.388674	0.4838	0.538478	0.518022	0.377615	0.627293	0.593794	0.473981	0.599366	1.00196	0.864776	0.970522	1.11939	0.909891	0.61414	0.391379	0.534085	0.43008	0.121252	0.123146	0.0134757	0.233376	0.582865	0.472035	0.0814791	0.700164	1.07345	0.74173	0.639017	1.24823	0.806756				0.287833	0.866718	0.988581	0.794652	0.645191	1.46332	1.68923	1.40269	1.54974	1.46169	1.49218
190	0.289669	0.386383	0.336041	0.0679798	0.0728182	0.0461133	0.114471	0.121362	0.0107706	0.250072	0.263328	0.146893	0.27121	0.713674	0.642585	0.763727	1.07128	0.933942	0.778038	0.772391	0.929048	0.758077	0.320893	0.398041	0.481116	0.188747	0.0888098	0.0696231	0.354257	0.236766	0.602917	0.330565	0.323337	0.962088	0.438412				0.25313	0.302223	0.476633	0.346966	0.205871	0.992001	1.30352	1.035	1.11766	1.06156	1.08747
193	0.691322	0.708933	0.840836	0.676494	0.570642	0.553079	0.623668	0.556988	0.645516	0.663295	0.680259	0.639077	0.607679	0.584208	0.552998	0.269602	0.220613	0.329475	0.354307	0.350401	0.261268	0.293264	0.581121	0.562693	0.536744	0.669356	0.830465	0.789189	0.473204	0.952102	1.24897	1.03727	0.941871	1.52551	1.06264				0.208647	0.770035	1.03539	0.87093	0.650206	1.49299	1.86554	1.53293	1.57998	1.59336	1.70863
194	1.10661	1.04445	1.11385	1.0108	0.946639	0.82156	0.846454	0.825816	0.893391	0.828285	0.876858	0.839232	0.718515	0.663075	0.661893	0.348986	0.230565	0.370412	0.41046	0.362275	0.243261	0.343097	0.620733	0.524393	0.515801	0.711927	0.847743	0.734796	0.490302	0.992571	1.26816	1.05941	1.05095	1.63415	1.09835				0.205626	0.773498	1.03963	0.928572	0.739081	1.53099	1.91363	1.63105	1.67389	1.6739	1.7811
195	0.468856	0.435449	0.509647	0.37672	0.331547	0.256351	0.256204	0.229486	0.378433	0.321179	0.378832	0.356011	0.303257	0.176491	0.173037	0.0548624	0.124161	0.00622765	0.068683	0.130887	0.043986	0.138833	0.444795	0.388357	0.380334	0.589123	0.784491	0.67256	0.428181	0.957696	1.29923	1.07722	1.08342	1.67128	1.15035				0.304592	0.840401	1.0388	0.973513	0.793503	1.49483	1.82793	1.60805	1.63218	1.55989	1.65597
196	0.159069	0.109205	0.233275	0.156232	0.0994425	0.0629011	0.11398	0.132192	0.305718	0.288219	0.406805	0.407995	0.363556	0.298906	0.346204	0.149728	0.106267	0.244685	0.357892	0.448289	0.371136	0.426656	0.742537	0.71302	0.701714	0.865052	1.07234	1.0079	0.700086	1.23113	1.56039	1.30689	1.23333	1.79356	1.3395				0.618233	1.18463	1.35539	1.22069	1.02858	1.78157	2.05521	1.80157	1.88288	1.80563	1.90731
197	0.751183	0.608789	0.732954	0.754137	0.726894	0.608502	0.642034	0.693552	0.814815	0.769848	0.882335	0.822311	0.699948	0.714161	0.738918	0.432235	0.373521	0.535673	0.600147	0.600704	0.541752	0.608122	0.85983	0.798102	0.824052	0.973003	1.12361	1.06597	0.78339	1.28947	1.57891	1.34523	1.27734	1.81428	1.35356				0.591624	1.17471	1.37265	1.23079	1.03129	1.80084	2.09022	1.82415	1.91193	1.86248	1.97963
198	0.878406	0.790577	0.835224	0.736628	0.720184	0.614451	0.527062	0.481021	0.638726	0.576489	0.593451	0.466583	0.395028	0.324555	0.25482	0.0595261	0.086619	0.0434225	0.0369949	0.0709382	0.040589	0.10286	0.314078	0.260452	0.30589	0.457114	0.604004	0.535716	0.297836	0.787204	1.11399	0.912792	0.895741	1.42633	0.942762				0.0794877	0.616597	0.799894	0.742554	0.546925	1.21714	1.52551	1.32496	1.35684	1.27507	1.40226
199	0.0444686	0.0116531	0.0878095	0.0223286	0.00865005	0.0254428	0.115992	0.141895	0.126933	0.0859739	0.123923	0.0480727	0.0692022	0.0509498	0.0957825	0.275814	0.255522	0.149183	0.0894035	0.0690874	0.0476054	0.0929349	0.362251	0.353547	0.376555	0.536146	0.759898	0.695866	0.42553	0.958366	1.33539	1.09072	1.05781	1.59644	1.14752				0.438085	0.967556	1.0646	1.00902	0.835986	1.44737	1.66585	1.50868	1.56585	1.40496	1.50578
200	0.377375	0.234623	0.473471	0.588287	0.607723	0.59752	0.644588	0.753979	0.977049	0.970138	1.15125	1.10426	1.02163	1.01941	1.073	0.836709	0.807067	0.986494	1.07518	1.12873	1.12084	1.19742	1.40484	1.34368	1.42013	1.55856	1.7031	1.66568	1.41088	1.90916	2.20789	1.98065	1.91881	2.38287	1.96715				1.25987	1.83289	1.96931	1.85139	1.6419	2.33092	2.55056	2.34051	2.4345	2.33095	2.46485
201	1.07807	0.758897	0.896923	1.08226	1.06357	0.872199	0.915795	1.02833	1.08892	1.03992	1.24067	1.13427	0.93801	0.972924	1.03954	0.691614	0.60717	0.836743	0.90863	0.864017	0.84083	0.981449	1.16732	1.03675	1.13651	1.32575	1.42293	1.33642	1.14338	1.65254	1.9066	1.69254	1.70046	2.16708	1.68579				0.944137	1.54447	1.70957	1.60315	1.41864	2.11618	2.36188	2.15124	2.25932	2.18739	2.3037
202	0.98299	0.682489	0.76988	0.881548	0.835077	0.633562	0.64992	0.723902	0.779824	0.697702	0.88914	0.77557	0.566994	0.522561	0.584177	0.241526	0.127051	0.366363	0.43418	0.383928	0.357385	0.548103	0.722488	0.548584	0.667844	0.910356	0.992987	0.85792	0.735724	1.25724	1.50835	1.31206	1.40583	1.85897	1.32807				0.565086	1.1565	1.30556	1.25335	1.09721	1.73022	1.97609	1.81277	1.9121	1.82633	1.92043
203	1.02912	0.723845	0.816679	0.918192	0.833623	0.627633	0.656082	0.720184	0.734084	0.627754	0.850794	0.689916	0.423477	0.348606	0.419158	0.0286856	0.102692	0.177234	0.217002	0.114231	0.137497	0.36166	0.449604	0.237536	0.424961	0.662817	0.678221	0.561188	0.492283	0.977934	1.18678	1.02575	1.13622	1.4984	0.994319				0.239702	0.852214	0.998375	0.924931	0.752476	1.40455	1.63078	1.45422	1.58695	1.53386	1.62891
204	1.00602	0.818813	1.23342	1.51058	1.48548	1.52249	1.73445	1.9176	2.05119	2.1023	2.46299	2.39815	2.19781	2.24583	2.40046	2.09274	2.00798	2.32084	2.40741	2.335	2.39732	2.59174	2.66055	2.492	2.70337	2.86918	2.87054	2.83527	2.71977	3.14965	3.35278	3.21211	3.22318	3.52212	3.11794				2.28802	2.87218	3.05737	2.9518	2.68534	3.37263	3.62401	3.41169	3.49569	3.46076	3.64629
215	0.172032	0.211988	0.0704962	0.040251	0.11988	0.195817	0.00590954	0.0512209	0.388537	0.468119	0.397562	0.341684	0.470143	0.590029	0.494815	0.343188	0.45065	0.452319	0.512075	0.693844	0.655551	0.529411	0.83692	0.950238	0.890007	0.901515	1.18429	1.22967	0.76575	1.27654	1.67416	1.36377	1.11848	1.72928	1.3942				0.799848	1.33695	1.43036	1.27476	1.08071	1.77329	1.94973	1.728	1.81601	1.64016	1.77242
216	0.220575	0.340657	0.23716	0.236958	0.189053	0.125564	0.278154	0.260384	0.0487745	0.0975468	0.0124886	0.0525316	0.0581955	0.268224	0.173913	0.000659225	0.113097	0.10459	0.164238	0.316717	0.264997	0.114565	0.441571	0.570092	0.48313	0.476536	0.765042	0.824893	0.321584	0.828755	1.21241	0.888027	0.601067	1.24083	0.917937				0.355992	0.907378	1.02303	0.821838	0.63145	1.38705	1.57222	1.30395	1.41541	1.26961	1.38856
217	0.115805	0.197878	0.139652	0.0769155	0.144357	0.0156655	0.260235	0.386745	0.199062	0.001547	0.143758	0.340197	0.221325	0.0321681	0.106867	0.332636	0.185156	0.185087	0.174757	0.0474876	0.044533	0.226679	0.0270551	0.168712	0.123248	0.0580286	0.306021	0.421053	0.0906675	0.367272	0.726343	0.423621	0.0860748	0.657411	0.397527				0.145033	0.419449	0.536195	0.29112	0.0760671	0.872109	1.03638	0.735505	0.877527	0.760307	0.891145
218	0.549119	0.509803	0.634203	0.594471	0.610813	0.582662	0.458197	0.406791	0.541967	0.62037	0.591659	0.362778	0.350576	0.556018	0.466155	0.135254	0.227878	0.322377	0.316941	0.363254	0.385184	0.297565	0.500335	0.566206	0.586718	0.579215	0.75473	0.836067	0.421296	0.870255	1.18414	0.930746	0.681856	1.20133	0.891361				0.247403	0.82727	0.990284	0.760906	0.525883	1.34202	1.55985	1.24368	1.369	1.3057	1.44541
219	0.294587	0.251033	0.396114	0.34152	0.290174	0.312732	0.294452	0.272924	0.38931	0.522144	0.497553	0.393157	0.414116	0.623989	0.559947	0.293572	0.365194	0.426301	0.465076	0.531909	0.488916	0.404052	0.694451	0.767829	0.724404	0.754457	0.973998	1.01754	0.581992	1.06661	1.39592	1.12011	0.888496	1.48631	1.12976				0.471733	1.04231	1.22742	1.00879	0.793044	1.61838	1.87276	1.54986	1.65342	1.59156	1.71312
220	0.0202546	0.0590016	0.239447	0.0233663	0.174774	0.0498249	0.0278137	0.0974892	0.0477595	0.27948	0.159592	0.0107223	0.116237	0.449926	0.325216	0.0809071	0.229539	0.237195	0.245626	0.336576	0.323727	0.150679	0.433421	0.578578	0.516115	0.465905	0.703269	0.817942	0.307747	0.758202	1.09625	0.812482	0.483256	1.08253	0.803488				0.202384	0.766737	0.948452	0.676445	0.443737	1.3109	1.54381	1.17891	1.29962	1.24687	1.37141
221	0.188937	0.327925	0.518797	0.273196	0.0922872	0.381941	0.276404	0.0828537	0.204611	0.454016	0.306273	0.0346539	0.106083	0.416808	0.290801	0.0110834	0.132394	0.176026	0.165067	0.226393	0.252604	0.0895395	0.314218	0.44043	0.425549	0.36072	0.556268	0.691471	0.205743	0.631504	0.944094	0.682601	0.352861	0.885901	0.632936				0.0421685	0.622243	0.801557	0.508067	0.259944	1.14986	1.36893	0.987007	1.13245	1.10388	1.23331
222	0.271526	0.271428	0.442533	0.339713	0.20592	0.23689	0.35371	0.34462	0.460522	0.534514	0.567449	0.499946	0.465265	0.609645	0.599279	0.315995	0.33344	0.425722	0.48264	0.504981	0.455915	0.396731	0.675472	0.719268	0.691137	0.732563	0.917692	0.961746	0.544518	1.01618	1.30872	1.04988	0.826007	1.38426	1.03177				0.378831	0.969904	1.18002	0.924294	0.696901	1.58522	1.85649	1.48749	1.61405	1.60482	1.71942
223	0.0344047	0.0371359	0.190236	0.0823096	0.082379	0.088111	0.140653	0.138573	0.113937	0.345417	0.369926	0.382756	0.434367	0.676849	0.650901	0.454432	0.511719	0.531658	0.604902	0.663487	0.572659	0.468633	0.817194	0.911215	0.8131	0.84508	1.07791	1.12577	0.654499	1.13628	1.44575	1.16468	0.908538	1.53752	1.1838				0.546897	1.12272	1.35001	1.08075	0.862418	1.76905	2.05997	1.66835	1.77821	1.77166	1.87263
224	0.17157	0.262303	0.409539	0.189916	0.0439527	0.0134474	0.220649	0.121032	0.124877	0.222042	0.196861	0.110086	0.0638782	0.477682	0.43516	0.173474	0.238549	0.269244	0.317466	0.315851	0.264623	0.119916	0.418611	0.526602	0.451465	0.422574	0.624173	0.73172	0.226674	0.668958	0.941888	0.663975	0.336086	0.918426	0.637288				0.0884696	0.686981	0.913289	0.569736	0.339934	1.31371	1.57164	1.1234	1.28895	1.31997	1.41575
225	0.0687165	0.176105	0.36213	0.129309	0.103068	0.00711081	0.238601	0.104514	0.0183535	0.344449	0.349976	0.211815	0.28054	0.560795	0.490958	0.203016	0.292381	0.349424	0.36355	0.367489	0.364617	0.230088	0.483693	0.58917	0.561849	0.528249	0.696996	0.822765	0.353628	0.772917	1.04559	0.807753	0.502641	1.033	0.759308				0.144145	0.736627	0.972584	0.640403	0.381885	1.35633	1.63468	1.17995	1.32629	1.37775	1.48979
226	0.262371	0.338137	0.4539	0.242364	0.0801706	0.0654019	0.247392	0.189265	0.118869	0.208453	0.267029	0.298279	0.280473	0.378067	0.410117	0.221713	0.18425	0.233666	0.32276	0.331899	0.210361	0.156718	0.508896	0.566006	0.4705	0.538027	0.738678	0.767703	0.332375	0.804032	1.08537	0.832824	0.613128	1.21492	0.841268				0.165711	0.749666	1.00898	0.727762	0.504559	1.45603	1.78681	1.36063	1.47314	1.52083	1.6114
227	0.214581	0.316546	0.41059	0.175684	0.00335202	0.0400723	0.18485	0.121658	0.0668411	0.0317234	0.0904087	0.157977	0.101936	0.367559	0.395021	0.244915	0.247417	0.23413	0.322773	0.315688	0.177094	0.0699285	0.44559	0.544686	0.402921	0.432936	0.649576	0.710768	0.218185	0.674257	0.939107	0.669603	0.38895	1.02225	0.686489				0.0845704	0.668944	0.941926	0.607812	0.39078	1.38976	1.71514	1.24023	1.37323	1.44459	1.51808
228	0.318698	0.472456	0.602013	0.30881	0.100629	0.152443	0.368846	0.219632	0.00651535	0.116087	0.113304	0.0815312	0.0641566	0.277328	0.278208	0.069966	0.0532236	0.0647272	0.116781	0.0402215	0.0404769	0.17603	0.131649	0.237364	0.146947	0.119938	0.289028	0.417246	0.085313	0.324339	0.555091	0.311182	0.0207252	0.539713	0.277209				0.270523	0.331718	0.604373	0.209016	0.0314996	1.02414	1.32586	0.797094	0.974647	1.08967	1.16505
229	0.527528	0.650002	0.769534	0.512962	0.342097	0.359153	0.555791	0.462884	0.359337	0.389843	0.428701	0.467829	0.443405	0.403768	0.460523	0.313191	0.151596	0.17775	0.249206	0.127386	0.0331915	0.0532961	0.266509	0.283264	0.195009	0.262535	0.398241	0.444776	0.0240421	0.455527	0.67039	0.451976	0.224177	0.776206	0.42493				0.229599	0.377284	0.679063	0.331179	0.0975621	1.14607	1.50705	0.997419	1.1448	1.28213	1.35944
230	0.416036	0.523223	0.621894	0.376555	0.207564	0.179728	0.400277	0.327619	0.181576	0.205409	0.264793	0.363835	0.309973	0.372788	0.455256	0.372292	0.290873	0.269351	0.362698	0.300447	0.0887714	0.0662361	0.454522	0.502631	0.336798	0.437038	0.616381	0.625022	0.196603	0.641344	0.867686	0.638334	0.432718	1.06258	0.669279				0.0178777	0.563523	0.893056	0.567311	0.352673	1.38484	1.78478	1.27867	1.38315	1.518	1.57731
252	0.964631	0.881317	0.884042	0.705629	0.664487	0.513577	0.453077	0.390629	0.50891	0.376901	0.385312	0.376178	0.294525	0.00153254	0.0470064	0.220856	0.408594	0.343878	0.339931	0.340029	0.522284	0.290048	0.0594607	0.283871	0.284169	0.110036	0.201431	0.15368	0.0347908	0.439452	0.739083	0.690554	1.15044	1.75899	0.965398				0.283762	0.031634	0.294943	0.634508	0.585325	0.829261	1.33867	1.36251	1.14166	1.06742	1.10503
253	0.777174	0.694843	0.723479	0.563976	0.53512	0.410685	0.352756	0.295438	0.445817	0.331969	0.352771	0.335536	0.278865	0.013106	0.0661638	0.22156	0.379068	0.304681	0.303448	0.268178	0.412377	0.175796	0.0392878	0.165014	0.137566	0.257395	0.357946	0.0194901	0.163987	0.637437	0.962212	0.928577	1.41649	2.00301	1.2311				0.0216564	0.301429	0.518038	0.897786	0.851048	0.999946	1.47423	1.5411	1.29612	1.18547	1.21922
254	0.808139	0.799765	0.845175	0.625101	0.60764	0.538892	0.46091	0.367673	0.563784	0.461377	0.437235	0.414511	0.413829	0.0814643	0.0189186	0.134991	0.259966	0.227918	0.270153	0.195372	0.315327	0.117953	0.0603697	0.104614	0.0738205	0.280888	0.376018	0.0696376	0.223261	0.641664	0.996718	1.00618	1.48582	2.04731	1.30899				0.0187266	0.194945	0.428286	0.858711	0.778746	0.87358	1.3875	1.47561	1.16064	1.05606	1.11724
255	0.792221	0.788589	0.83277	0.611159	0.595896	0.531231	0.44657	0.351441	0.553151	0.452666	0.423764	0.39333	0.395658	0.0710831	0.0353153	0.164215	0.280106	0.244557	0.291248	0.213569	0.322747	0.139849	0.0413615	0.109819	0.0755046	0.259255	0.365424	0.0838761	0.192745	0.624425	0.991878	0.974282	1.39517	1.96125	1.2434				0.0576938	0.200657	0.428105	0.805414	0.705357	0.874443	1.37162	1.43204	1.1493	1.03938	1.1128
256	0.874191	0.848215	0.893342	0.69801	0.694186	0.627396	0.526513	0.439573	0.656683	0.558448	0.535061	0.486366	0.488108	0.175551	0.062829	0.0793519	0.182486	0.137444	0.186224	0.0973449	0.187423	0.0111695	0.153533	0.00653406	0.0580892	0.376574	0.48011	0.214651	0.313055	0.747065	1.11552	1.08822	1.49574	2.02917	1.33144				0.0718236	0.335157	0.528274	0.911912	0.812898	0.947528	1.40924	1.49634	1.22875	1.09154	1.18101
257	0.992055	0.97779	1.02657	0.829845	0.834335	0.771957	0.674996	0.597218	0.824704	0.710762	0.695808	0.660798	0.662247	0.309627	0.206165	0.0972835	0.023082	0.0151981	0.0295453	0.0644821	0.0268408	0.165637	0.306488	0.139626	0.201998	0.535384	0.61808	0.332187	0.486237	0.896954	1.25175	1.25379	1.71954	2.20969	1.50211				0.223903	0.447702	0.630506	1.07186	0.989577	1.03726	1.50025	1.6324	1.33881	1.19905	1.28106
258	0.989806	1.01163	1.06189	0.83661	0.845008	0.801014	0.700247	0.612593	0.853685	0.735097	0.703701	0.676067	0.694675	0.315431	0.200308	0.112478	0.00551546	0.0133817	0.0440923	0.0615934	0.0268062	0.148366	0.280002	0.125635	0.184584	0.500948	0.584539	0.311788	0.453822	0.849535	1.21654	1.22148	1.66162	2.14802	1.45196				0.130812	0.357529	0.555494	0.985022	0.881671	0.964683	1.44459	1.56344	1.26087	1.13117	1.22236
259	0.979652	0.991254	1.03736	0.823913	0.841713	0.798716	0.676051	0.588005	0.843857	0.729591	0.690986	0.641181	0.663519	0.305369	0.174629	0.0604345	0.0362267	0.0111142	0.0777216	0.0377367	0.029696	0.121292	0.247589	0.114536	0.183027	0.465027	0.559306	0.324293	0.410036	0.818248	1.19693	1.17116	1.54177	2.01914	1.36057				0.0942577	0.361342	0.534558	0.913826	0.791111	0.925266	1.36827	1.47056	1.20744	1.05794	1.1719
260	0.984424	0.985955	1.04058	0.849513	0.878805	0.841548	0.716348	0.640176	0.910439	0.799141	0.774106	0.720638	0.74664	0.387998	0.262528	0.162893	0.0730585	0.105321	0.0461869	0.177051	0.125234	0.285606	0.395992	0.261381	0.346823	0.632948	0.722986	0.487852	0.602058	1.00469	1.38169	1.3665	1.76932	2.20965	1.56355				0.344464	0.583282	0.714162	1.13444	1.02852	1.06777	1.4752	1.62585	1.35407	1.17447	1.28679
261	1.30473	1.33904	1.40282	1.19355	1.22794	1.20754	1.08999	1.01394	1.29559	1.17262	1.1456	1.1093	1.14406	0.74017	0.616034	0.557776	0.451749	0.46404	0.399939	0.538845	0.481404	0.641327	0.723185	0.575678	0.662549	0.944118	1.00954	0.76278	0.913351	1.27504	1.63825	1.65201	2.08173	2.46918	1.82016				0.515209	0.716125	0.865995	1.33811	1.2278	1.21794	1.6571	1.84203	1.53556	1.36905	1.49658
262	1.31664	1.38169	1.43918	1.20558	1.25325	1.25008	1.107	1.0194	1.32785	1.19938	1.14274	1.10069	1.15772	0.736425	0.582749	0.530146	0.439375	0.425296	0.337299	0.498527	0.450693	0.565061	0.632699	0.515559	0.597046	0.827546	0.900369	0.694828	0.784186	1.13269	1.51686	1.51266	1.85865	2.23741	1.6279				0.294893	0.522088	0.678835	1.10501	0.953067	1.02164	1.46355	1.62027	1.32573	1.16049	1.32318
263	1.05875	1.07447	1.13387	0.951585	0.998929	0.977103	0.839524	0.773813	1.06966	0.950785	0.928515	0.868986	0.90192	0.529901	0.400829	0.314491	0.233859	0.264364	0.202039	0.351597	0.325116	0.465576	0.547412	0.4251	0.529808	0.779579	0.865073	0.66645	0.748815	1.14182	1.51842	1.48567	1.83003	2.21482	1.61903				0.452768	0.724447	0.824485	1.20445	1.07647	1.14891	1.51085	1.66001	1.42741	1.22928	1.36431
264	0.939867	0.975023	1.02761	0.834504	0.898874	0.888351	0.733113	0.66946	0.987182	0.857465	0.826121	0.77118	0.818987	0.414071	0.277424	0.230009	0.151711	0.164205	0.0992122	0.273351	0.259288	0.395761	0.449709	0.33446	0.449755	0.693297	0.773026	0.579602	0.696825	1.06546	1.44783	1.43767	1.81703	2.15436	1.58313				0.462067	0.685259	0.732989	1.16735	1.05648	1.00785	1.33301	1.54042	1.28384	1.05464	1.18472
265	1.09128	1.14773	1.19584	0.985429	1.04884	1.03882	0.889902	0.829664	1.14312	0.992206	0.960502	0.922606	0.962605	0.515424	0.385879	0.365957	0.261326	0.258158	0.191533	0.360029	0.33633	0.471945	0.501924	0.369086	0.485595	0.723311	0.779471	0.580057	0.713052	1.05537	1.42075	1.42223	1.80379	2.10019	1.52867				0.358743	0.584303	0.650972	1.08907	0.967961	0.938895	1.28351	1.4919	1.23602	1.02749	1.16387
266	1.01174	1.06454	1.09352	0.882178	0.954707	0.934991	0.759805	0.700283	1.02142	0.856687	0.810172	0.758924	0.794326	0.34907	0.203533	0.161032	0.0639795	0.054805	0.0242599	0.14663	0.131913	0.235622	0.260712	0.147597	0.264201	0.463186	0.528708	0.36742	0.432438	0.786394	1.16119	1.12896	1.42541	1.73012	1.19475				0.0729151	0.355656	0.416295	0.772805	0.624521	0.704695	1.0218	1.17973	0.975665	0.766804	0.918543
267	0.799641	0.840786	0.878092	0.697755	0.783201	0.774518	0.594059	0.548791	0.882623	0.730688	0.701914	0.635808	0.676625	0.25794	0.120925	0.0857547	0.0126634	0.0221062	0.04213	0.145774	0.163585	0.271685	0.284944	0.186502	0.326466	0.517815	0.591049	0.454406	0.519142	0.880845	1.25342	1.21141	1.49973	1.76551	1.27784				0.303621	0.594268	0.582895	0.923731	0.790213	0.815753	1.04456	1.22609	1.05745	0.804142	0.945574
268	0.898966	0.977394	1.01942	0.815519	0.911156	0.923075	0.744105	0.696709	1.04723	0.889935	0.851767	0.80735	0.868534	0.408293	0.268852	0.289461	0.208696	0.19155	0.126803	0.337489	0.352036	0.458442	0.450469	0.352565	0.489981	0.68057	0.743624	0.598171	0.707109	1.03082	1.40462	1.39502	1.72769	1.94402	1.46517				0.461392	0.68799	0.655578	1.07163	0.948339	0.855941	1.0894	1.33226	1.11385	0.845785	0.99248
269	0.999985	1.10593	1.14115	0.912136	1.01001	1.02736	0.845972	0.795581	1.15067	0.977512	0.924703	0.896821	0.962893	0.466918	0.320426	0.366946	0.272385	0.227395	0.153726	0.374581	0.377175	0.458807	0.441371	0.348588	0.472617	0.638754	0.699134	0.563502	0.644788	0.95217	1.33124	1.31488	1.60618	1.81439	1.34331				0.27496	0.515946	0.514066	0.906534	0.753177	0.734972	0.998812	1.21626	0.999926	0.75088	0.91648
270	0.790329	0.866379	0.901928	0.709997	0.807818	0.816665	0.634162	0.599212	0.945122	0.776912	0.748128	0.69515	0.740901	0.286694	0.153239	0.165028	0.086067	0.0763604	0.0135472	0.221027	0.254668	0.341288	0.318042	0.231392	0.382749	0.537134	0.599654	0.49859	0.543	0.879	1.24173	1.19354	1.4302	1.62836	1.20133				0.288253	0.603268	0.565436	0.858826	0.702161	0.770745	0.952801	1.11943	0.992831	0.733839	0.884381
271	0.733795	0.814123	0.867028	0.692853	0.797747	0.826417	0.652873	0.625619	0.978687	0.82852	0.816662	0.760177	0.816354	0.377683	0.2575	0.292085	0.22613	0.230802	0.183132	0.397866	0.454147	0.560813	0.519166	0.431643	0.605096	0.768228	0.820657	0.723527	0.81243	1.13249	1.47991	1.45223	1.72768	1.86581	1.47037				0.647388	0.933585	0.837212	1.16424	1.03047	0.984371	1.1058	1.3247	1.19602	0.904891	1.04465
272	0.888013	1.0059	1.06204	0.857987	0.963446	1.00845	0.844519	0.812335	1.16941	1.01187	0.991117	0.959107	1.02765	0.547713	0.428711	0.514388	0.433518	0.411283	0.362828	0.591224	0.639142	0.740839	0.680161	0.589034	0.75577	0.913487	0.952117	0.848767	0.964242	1.24754	1.58899	1.58409	1.87842	1.96839	1.57982				0.697766	0.946706	0.855892	1.22668	1.08613	0.996517	1.14118	1.39058	1.23098	0.942847	1.09378
273	0.934233	1.07334	1.10994	0.8908	1.01361	1.05963	0.869931	0.842495	1.21612	1.03695	0.993265	0.970187	1.04442	0.538042	0.402336	0.509864	0.424602	0.366802	0.310812	0.562199	0.601512	0.649732	0.580873	0.515619	0.661249	0.75897	0.810691	0.746787	0.776588	1.05024	1.4069	1.36779	1.55275	1.64125	1.30053				0.413813	0.699384	0.619209	0.918682	0.734751	0.763728	0.901813	1.1026	0.977292	0.690736	0.879263
274	0.935355	1.06388	1.09056	0.896473	1.04028	1.08474	0.869138	0.855538	1.2407	1.06024	1.01613	0.974196	1.04656	0.564843	0.425351	0.522013	0.453101	0.40093	0.350051	0.602044	0.659512	0.689633	0.605109	0.556395	0.710221	0.772488	0.82593	0.79627	0.792932	1.05871	1.40828	1.35459	1.48742	1.54496	1.26436				0.489241	0.785736	0.655217	0.922699	0.743495	0.750241	0.813578	1.02303	0.933299	0.615671	0.818155
275	0.999758	1.11767	1.14758	0.95883	1.08979	1.1268	0.928964	0.917785	1.27982	1.09702	1.06922	1.02954	1.08562	0.594363	0.474233	0.577559	0.488849	0.44874	0.404766	0.631346	0.690484	0.756995	0.642657	0.562342	0.735676	0.824159	0.838695	0.787536	0.863874	1.09602	1.41061	1.39959	1.61043	1.59392	1.31412				0.55948	0.816671	0.656159	0.982862	0.829625	0.716193	0.762073	1.02745	0.917159	0.604605	0.793147
276	0.842198	0.996989	1.02889	0.813527	0.946495	1.00244	0.815542	0.801836	1.16984	0.986148	0.951944	0.938079	1.01318	0.494982	0.380227	0.539648	0.44959	0.388065	0.353414	0.605296	0.66606	0.727687	0.611575	0.544688	0.712304	0.800658	0.823752	0.779082	0.864446	1.08741	1.4059	1.39841	1.61309	1.57239	1.31288				0.596249	0.853074	0.673755	0.991172	0.834507	0.726083	0.749145	1.01107	0.909812	0.58595	0.754982
277	1.01032	1.18302	1.20094	0.989984	1.15106	1.21499	0.998372	0.999353	1.38848	1.19361	1.14431	1.13214	1.21341	0.694216	0.56965	0.748066	0.662814	0.576467	0.547732	0.816693	0.87639	0.883317	0.756822	0.717354	0.865673	0.8796	0.916434	0.920763	0.906343	1.11176	1.43665	1.38824	1.46633	1.40863	1.22673				0.544951	0.827567	0.639716	0.886774	0.694253	0.671269	0.655403	0.888297	0.82897	0.482846	0.708855
278	1.04952	1.19147	1.23851	1.06727	1.20452	1.27417	1.0904	1.09246	1.44808	1.28479	1.27728	1.22834	1.28713	0.826282	0.727673	0.857537	0.785089	0.7603	0.733059	0.949202	1.05108	1.11198	0.944345	0.876873	1.08241	1.12129	1.10474	1.11534	1.17489	1.35774	1.62591	1.61756	1.74665	1.61028	1.45332				0.844198	1.13047	0.922299	1.16389	0.98308	0.905225	0.844358	1.08769	1.04972	0.733406	0.940834
279	0.908393	1.06335	1.0888	0.8905	1.03274	1.09034	0.899478	0.900791	1.2586	1.07046	1.04589	1.02666	1.09156	0.579846	0.481647	0.657357	0.5639	0.507641	0.486087	0.719431	0.799785	0.864236	0.698268	0.628018	0.815725	0.873517	0.859547	0.846011	0.95663	1.11923	1.38991	1.4078	1.60787	1.43816	1.27752				0.717729	0.955397	0.694057	1.00066	0.857236	0.64658	0.561289	0.865669	0.792216	0.453966	0.631918
280	0.989208	1.15719	1.17879	0.97131	1.10616	1.16442	0.985675	0.991863	1.33025	1.13218	1.11103	1.1044	1.15672	0.629526	0.54536	0.746529	0.632926	0.563915	0.550921	0.771554	0.847446	0.900716	0.706021	0.629611	0.814685	0.841425	0.802633	0.811603	0.900461	1.02823	1.2728	1.28883	1.43195	1.20341	1.09097				0.523344	0.78847	0.543248	0.793894	0.61238	0.49598	0.399054	0.661458	0.625926	0.312756	0.511526
281	1.1566	1.32533	1.35332	1.16945	1.31348	1.38566	1.20023	1.21547	1.55359	1.36947	1.35634	1.32654	1.3761	0.888131	0.806281	0.989305	0.894184	0.840716	0.828594	1.03381	1.13574	1.16981	0.947529	0.885134	1.08458	1.05968	1.01009	1.06583	1.10135	1.20607	1.43425	1.43224	1.47541	1.21374	1.17582				0.662205	0.946301	0.694479	0.882061	0.676508	0.610616	0.467033	0.708074	0.7111	0.392368	0.633973
282	1.18784	1.35517	1.40801	1.23301	1.36304	1.45181	1.29175	1.2979	1.62576	1.46842	1.47406	1.42984	1.48429	1.02367	0.953249	1.12535	1.04712	1.027	1.01165	1.19865	1.33152	1.40794	1.1624	1.08804	1.32604	1.33377	1.24951	1.30083	1.42434	1.50089	1.68846	1.73732	1.86058	1.51978	1.49967				1.04514	1.29851	1.01671	1.23736	1.05242	0.875836	0.699618	0.979216	0.968703	0.673913	0.886625
293	0.959429	1.21911	1.23693	0.986743	1.12608	1.23574	1.09641	1.11074	1.41484	1.231	1.19952	1.25203	1.33616	0.811268	0.782118	1.1334	1.02989	0.921575	0.969059	1.18023	1.29535	1.32288	1.04983	1.02032	1.20117	1.12774	1.02749	1.15817	1.22895	1.17589	1.29138	1.33769	1.27812	0.723171	0.95044				0.70238	0.995042	0.671888	0.6917	0.427495	0.480529	0.106476	0.269003	0.389802	0.0995173	0.315605
294	0.842569	1.07603	1.09052	0.843163	0.979508	1.06732	0.916818	0.927781	1.24448	1.04617	1.01384	1.06192	1.13759	0.586205	0.538542	0.862913	0.743376	0.631266	0.662824	0.894541	0.980565	1.01681	0.784142	0.737692	0.907013	0.885733	0.821392	0.892754	0.985969	1.01313	1.19025	1.229	1.28852	0.858802	0.936535				0.578231	0.86732	0.554872	0.676602	0.44851	0.428494	0.157356	0.358157	0.42122	0.109331	0.286585
295	0.827034	1.07267	1.06879	0.804767	0.952561	1.03215	0.867519	0.885999	1.21392	0.99408	0.941908	1.02239	1.10406	0.514701	0.46293	0.831969	0.689638	0.530815	0.583677	0.85191	0.893629	0.886777	0.700034	0.664308	0.77639	0.729134	0.720187	0.785008	0.769091	0.841921	1.07454	1.04476	1.00901	0.68845	0.735545				0.306719	0.632808	0.370051	0.440208	0.187219	0.345692	0.128504	0.249829	0.354078	0.015141	0.198464
296	1.06868	1.3053	1.32721	1.06582	1.16538	1.2484	1.14286	1.14683	1.4068	1.21012	1.19114	1.25609	1.30485	0.750974	0.739595	1.0806	0.924652	0.808889	0.859544	1.03452	1.10111	1.1535	0.880187	0.788812	0.948543	0.909485	0.755721	0.839974	0.931001	0.864574	0.961221	1.02994	1.00834	0.445629	0.593311				0.0677617	0.376984	0.17036	0.190883	0.160777	0.0868913	0.108964	0.0763472	0.00543982	0.138833	0.114254
297	0.994879	1.22735	1.26118	0.992596	1.08815	1.17404	1.07018	1.05867	1.33436	1.14773	1.12551	1.18313	1.24785	0.69101	0.660476	0.983987	0.845063	0.738247	0.762766	0.959767	1.03046	1.10858	0.865604	0.777768	0.949982	0.987979	0.857857	0.88369	1.09478	1.07286	1.1847	1.30368	1.49849	0.958923	0.980468				0.380399	0.628926	0.409564	0.606197	0.309114	0.336374	0.216445	0.384767	0.392973	0.255184	0.400015
298	0.776321	1.00966	1.03545	0.754291	0.862376	0.943457	0.816654	0.800201	1.10975	0.914625	0.870649	0.938345	1.0246	0.43993	0.378464	0.707998	0.572475	0.436497	0.448603	0.706597	0.748773	0.79744	0.62592	0.565224	0.700506	0.761226	0.730547	0.718663	0.861377	0.959479	1.19886	1.24544	1.44857	1.1568	1.02947				0.339718	0.610074	0.428403	0.65948	0.400699	0.479085	0.457585	0.628958	0.616538	0.358427	0.469436
299	0.806315	1.0598	1.07935	0.781162	0.886576	0.972977	0.854573	0.83857	1.13615	0.937854	0.881841	0.975503	1.06945	0.471063	0.419759	0.800415	0.654041	0.481472	0.515781	0.790306	0.811179	0.826467	0.670557	0.622702	0.715329	0.74158	0.726176	0.731699	0.791145	0.875887	1.11696	1.1265	1.20545	0.898073	0.822449				0.0806283	0.390333	0.266757	0.375131	0.025512	0.371713	0.39448	0.41482	0.453309	0.271188	0.413149
300	0.850022	1.11742	1.1409	0.829627	0.929353	1.02333	0.91888	0.894379	1.17991	0.990313	0.929441	1.03154	1.13549	0.545192	0.501917	0.897542	0.765637	0.590549	0.622288	0.883461	0.915696	0.942854	0.773315	0.743191	0.833839	0.881985	0.842691	0.843546	1.02357	1.04073	1.22576	1.31364	1.52399	1.05399	1.00697				0.231209	0.45451	0.302109	0.517396	0.130702	0.368749	0.395825	0.498778	0.503608	0.316572	0.389495
301	1.05822	1.2926	1.30144	0.999205	1.09772	1.15266	1.03762	1.02218	1.3055	1.0841	1.02908	1.1392	1.21098	0.583359	0.543514	0.902541	0.717342	0.540436	0.573351	0.809513	0.767626	0.817795	0.685969	0.5788	0.628093	0.727664	0.683822	0.567696	0.785767	0.819565	1.04689	1.14191	1.48466	1.16077	0.917869				0.0641661	0.0889734	0.0290648	0.392724	0.121539	0.10009	0.293053	0.579063	0.407105	0.248332	0.32055
302	1.02776	1.26394	1.30051	0.987287	1.05901	1.13227	1.04164	0.999265	1.275	1.08661	1.03225	1.12431	1.21124	0.608545	0.551557	0.884475	0.719931	0.553289	0.555901	0.802194	0.769709	0.818179	0.711188	0.613637	0.670731	0.79322	0.779336	0.644113	0.822244	0.922843	1.21542	1.27013	1.5624	1.39844	1.03907				0.221433	0.00559592	0.0659897	0.387149	0.00842301	0.317379	0.699402	0.858725	0.61253	0.538308	0.667752
303	0.859875	1.13821	1.16638	0.821117	0.902764	0.998093	0.904287	0.852977	1.1333	0.951921	0.862857	0.98108	1.10863	0.501212	0.434491	0.840512	0.710846	0.485498	0.490257	0.788154	0.766155	0.742451	0.645154	0.658245	0.653847	0.711081	0.779196	0.705901	0.834494	0.888144	1.27234	1.30343	1.52843	1.31827	1.02935				0.263078	0.0761925	0.0311444	0.219206	0.310023	0.186544	0.621328	0.705957	0.245218	0.298689	0.399068
304	0.964298	1.21655	1.22348	0.893464	0.978341	1.0342	0.939144	0.910189	1.17216	0.955659	0.883321	1.0212	1.10722	0.476318	0.442732	0.832116	0.649519	0.437097	0.471961	0.710763	0.632562	0.660548	0.569977	0.493188	0.470105	0.58505	0.569043	0.415962	0.687075	0.667684	0.957359	1.10665	1.57508	1.34954	0.963903				0.336947	0.259501	0.247094	0.260504	0.139669	0.0239556	0.464135	0.767252	0.28182	0.322804	0.266133
305	0.988201	1.23212	1.24513	0.905456	0.984867	1.03786	0.934049	0.887635	1.16515	0.954073	0.869573	0.994521	1.0902	0.453013	0.388613	0.739371	0.558799	0.344521	0.345288	0.593921	0.493135	0.52026	0.458597	0.37306	0.343249	0.484517	0.491813	0.293306	0.551357	0.586749	0.963836	1.09768	1.56645	1.5779	1.062				0.462291	0.399969	0.272266	0.28956	0.0113935	0.0410321	0.566913	0.842756	0.327071	0.330106	0.347921
317	1.0002	1.23118	1.24184	0.850858	0.887389	0.92426	0.796384	0.68003	0.954999	0.760907	0.592103	0.678605	0.799507	0.167635	0.0037838	0.153137	0.052092	0.299675	0.435266	0.296209	0.488969	0.515665	0.481734	0.590777	0.596166	0.444196	0.410074	0.541215	0.555477	0.275625	0.153664	0.168885	0.316789	0.782689	0.222491				1.1708	0.793669	0.506111	0.398913	0.658357	0.034047	0.516366	0.341981	0.13676	0.185438	0.279473
318	0.908064	1.1613	1.1553	0.738585	0.780576	0.815178	0.684569	0.566446	0.82832	0.623609	0.434787	0.551203	0.677173	0.0292375	0.130969	0.0882438	0.127328	0.429461	0.5362	0.392952	0.661288	0.701975	0.656278	0.808034	0.884028	0.709558	0.720165	0.916348	0.836002	0.612784	0.19775	0.105177	0.11691	0.619501	0.0230782				1.4562	1.11128	0.793983	0.663933	0.900268	0.286614	0.310025	0.125202	0.120531	0.0310333	0.00965913
319	1.08659	1.32095	1.30416	0.895416	0.947935	0.963004	0.812177	0.699506	0.975804	0.754793	0.571847	0.67941	0.788009	0.134101	0.0297397	0.162634	0.0582294	0.332652	0.43599	0.284553	0.540644	0.555024	0.514607	0.675228	0.760674	0.578321	0.597285	0.852273	0.720738	0.534346	0.15338	0.0340379	0.285052	0.740017	0.0859069				1.565	1.28575	0.947366	0.670382	0.886245	0.434871	0.20306	0.136642	0.1831	0.109538	0.0445465
320	1.35292	1.57749	1.58975	1.17562	1.20228	1.23528	1.08862	0.93766	1.21353	1.03492	0.840781	0.893687	1.01423	0.419195	0.211904	0.304445	0.127178	0.105198	0.263556	0.143349	0.349208	0.360033	0.32677	0.459867	0.505448	0.346683	0.362201	0.573964	0.501295	0.299073	0.0687509	0.167836	0.428256	0.879885	0.239956				1.4807	1.19496	0.810728	0.539716	0.787459	0.311246	0.362358	0.278418	0.0489419	0.0335753	0.16754
321	1.43578	1.66302	1.68987	1.25786	1.24986	1.28848	1.17288	0.995918	1.22487	1.07661	0.876798	0.921651	1.03589	0.491357	0.287561	0.351874	0.180116	0.0488411	0.207892	0.142162	0.380685	0.376234	0.317432	0.474434	0.554092	0.372288	0.414244	0.665231	0.570019	0.386268	0.088193	0.0442032	0.324172	0.807791	0.136209				1.65128	1.3495	0.886168	0.647619	0.878847	0.33041	0.401825	0.256314	0.0644654	0.0815328	0.201015
322	1.32284	1.56512	1.54899	1.10253	1.13191	1.14875	0.993801	0.840851	1.09417	0.892676	0.674877	0.762217	0.873276	0.255176	0.0614106	0.203548	0.00405037	0.287521	0.415444	0.310493	0.599737	0.615365	0.55823	0.73651	0.8715	0.685274	0.737975	1.05224	0.895302	0.760909	0.479786	0.303134	0.0618521	0.525417	0.175158				2.03191	1.78859	1.33407	1.00521	1.19033	0.756511	0.0168029	0.0902171	0.445206	0.307217	0.222555
323	1.43195	1.6456	1.62702	1.20542	1.24314	1.24383	1.0767	0.935103	1.2039	0.994278	0.795919	0.86673	0.961805	0.346526	0.153834	0.26296	0.0557247	0.187046	0.314378	0.199256	0.452661	0.441164	0.392031	0.567847	0.662498	0.466973	0.500504	0.806634	0.649528	0.488769	0.177206	0.0302698	0.357668	0.793505	0.084671				1.77919	1.58029	1.15718	0.740896	0.922791	0.613437	0.110642	0.123821	0.263737	0.176404	0.061854
324	1.54939	1.74949	1.74312	1.31495	1.32466	1.32566	1.16647	0.996338	1.24027	1.05937	0.853626	0.888586	0.974623	0.416902	0.205899	0.234408	0.0437209	0.164993	0.31643	0.249371	0.489803	0.462853	0.400091	0.577595	0.654026	0.452235	0.485892	0.777392	0.653672	0.459583	0.166323	0.041494	0.311242	0.782705	0.0696432				1.76611	1.53031	1.08087	0.716333	0.904372	0.522896	0.211529	0.17431	0.18521	0.0855682	0.0458151
334	1.78758	1.96835	2.02878	1.69668	1.74537	1.79283	1.67468	1.56649	1.87723	1.7255	1.62916	1.66463	1.77293	1.21865	1.0679	1.20636	1.0778	0.945634	0.853999	1.06263	0.961472	1.04609	1.05396	0.935234	0.944975	1.16447	1.18568	0.911881	1.15983	1.31385	1.6796	1.82366	2.33246	2.59245	1.94872				0.174685	0.112928	0.392033	1.13236	0.994544	0.748014	1.38831	1.70432	1.16071	1.08157	1.25346
335	1.67636	1.88938	1.95679	1.61005	1.66537	1.73916	1.62526	1.5147	1.83579	1.69097	1.58893	1.63336	1.76529	1.19895	1.04718	1.23704	1.1269	0.975056	0.882626	1.12359	1.04661	1.11087	1.09604	1.01291	1.02289	1.21665	1.24664	1.00114	1.26119	1.37239	1.76297	1.92656	2.43622	2.65414	2.05114				0.251706	0.116506	0.383151	1.18136	1.02585	0.693251	1.34017	1.69575	1.09046	1.00755	1.18449
336	1.6466	1.86691	1.93158	1.57668	1.62939	1.70548	1.58957	1.47517	1.79608	1.64871	1.53583	1.58382	1.72113	1.14512	0.984562	1.17724	1.06148	0.89006	0.787898	1.03633	0.942082	0.9774	0.968803	0.891341	0.88127	1.04855	1.08436	0.846955	1.04429	1.16299	1.57467	1.70465	2.12893	2.37014	1.75483				0.147462	0.171005	0.142876	0.830035	0.602443	0.492792	1.17686	1.45814	0.882932	0.835565	1.04193
337	1.69363	1.8946	1.95481	1.61796	1.68258	1.74852	1.61142	1.50383	1.84399	1.69028	1.57929	1.612	1.74178	1.17142	1.00041	1.15625	1.04029	0.887215	0.781674	1.02915	0.941517	0.981048	0.976699	0.88852	0.900495	1.06525	1.10616	0.881296	1.04194	1.2069	1.61356	1.70645	2.09594	2.33526	1.73877				0.014326	0.012795	0.26293	0.903435	0.69352	0.590547	1.20381	1.48554	0.979245	0.877664	1.10141
338	1.84109	2.03349	2.07034	1.75013	1.83754	1.88348	1.72647	1.6474	1.99336	1.80458	1.7038	1.75009	1.85585	1.25288	1.10288	1.28691	1.13918	0.982416	0.906333	1.15085	1.05572	1.10552	1.07602	0.956577	0.974479	1.13634	1.15568	0.918347	1.10566	1.24884	1.61392	1.70603	2.12359	2.25752	1.69462				0.0606133	0.045133	0.216588	0.923248	0.764735	0.506994	1.05295	1.42887	0.951046	0.801579	1.02886
339	1.59787	1.81782	1.86312	1.53099	1.61683	1.68594	1.54432	1.46381	1.80783	1.62985	1.52994	1.58828	1.71256	1.10632	0.964185	1.19666	1.06339	0.893164	0.823431	1.09399	1.01824	1.0554	1.01705	0.927889	0.94419	1.0929	1.12831	0.912693	1.10169	1.22639	1.61535	1.70789	2.11436	2.22421	1.6889				0.0634555	0.0380759	0.196607	0.896752	0.706953	0.461265	1.00499	1.38217	0.874516	0.725181	0.942745
340	1.59313	1.78867	1.83773	1.52455	1.59517	1.64886	1.52172	1.44816	1.7721	1.59072	1.51021	1.56294	1.6596	1.06235	0.933659	1.12935	0.970619	0.822198	0.754442	0.994243	0.9029	0.951668	0.920638	0.793054	0.822539	0.977231	0.992989	0.77462	0.918995	1.08592	1.45217	1.50833	1.84818	1.98243	1.42855				0.184003	0.0531265	0.145674	0.677955	0.438059	0.468207	1.00886	1.26258	0.862084	0.75787	0.980504
341	1.28451	1.47146	1.50816	1.20718	1.30303	1.35416	1.19092	1.12336	1.48152	1.2957	1.20694	1.24039	1.3463	0.759704	0.60922	0.78143	0.653339	0.518981	0.441305	0.704367	0.65476	0.697403	0.662854	0.574224	0.637489	0.781795	0.830427	0.66201	0.781794	0.994624	1.39308	1.42598	1.75115	1.90814	1.41262				0.0612694	0.192867	0.267259	0.781757	0.587804	0.51065	0.915205	1.19064	0.837057	0.636616	0.836391
342	1.34936	1.5543	1.60022	1.30419	1.4069	1.47753	1.32449	1.2669	1.62599	1.44629	1.37125	1.41128	1.52255	0.935501	0.804014	1.02341	0.900884	0.768126	0.712984	0.988291	0.962455	1.0127	0.949013	0.86191	0.938983	1.0729	1.10836	0.951424	1.10142	1.27586	1.64304	1.68803	2.02464	2.06491	1.62823				0.356245	0.446341	0.459423	1.01985	0.838512	0.645242	0.994784	1.34304	0.99386	0.751271	0.963068
343	1.38631	1.60959	1.65311	1.34431	1.44273	1.52	1.37627	1.32026	1.66904	1.4837	1.40405	1.46236	1.57535	0.968569	0.844909	1.1042	0.964802	0.804082	0.757364	1.04422	0.998862	1.02133	0.953611	0.865322	0.916721	1.01754	1.04997	0.90095	1.00168	1.15177	1.518	1.5432	1.80259	1.80797	1.394				0.0339324	0.170641	0.229859	0.71391	0.451705	0.438149	0.832145	1.11914	0.78271	0.588915	0.838127
344	1.45999	1.64686	1.69214	1.40962	1.4959	1.54989	1.40996	1.36203	1.69626	1.50262	1.44264	1.48423	1.55915	0.965549	0.846941	1.03892	0.873007	0.743589	0.687307	0.929649	0.873414	0.904877	0.831981	0.705141	0.78245	0.87726	0.876535	0.744337	0.798585	0.984734	1.32616	1.33182	1.53141	1.58343	1.16101				0.168376	0.0767643	0.177048	0.531168	0.250953	0.428801	0.815202	0.981037	0.740822	0.601262	0.853918
345	1.09858	1.2812	1.31888	1.05483	1.16613	1.22557	1.05977	1.02266	1.38368	1.19406	1.13671	1.15845	1.24549	0.67738	0.55101	0.738111	0.61627	0.509634	0.458639	0.725748	0.728213	0.76808	0.688059	0.607229	0.721702	0.819955	0.855012	0.762908	0.825799	1.04819	1.40332	1.39264	1.60658	1.64691	1.28721				0.24165	0.480398	0.445396	0.801961	0.587528	0.61475	0.836931	1.05936	0.873139	0.619853	0.825678
346	1.07092	1.27731	1.31847	1.04968	1.16328	1.24068	1.08796	1.05747	1.40958	1.22452	1.17474	1.20863	1.30157	0.729505	0.623729	0.86554	0.744116	0.630703	0.602812	0.874532	0.895834	0.94059	0.827019	0.748321	0.873494	0.956913	0.970318	0.899036	0.986993	1.16444	1.48206	1.48726	1.69422	1.61564	1.33072				0.374872	0.602169	0.515717	0.865275	0.640999	0.632952	0.788744	1.03494	0.881639	0.608191	0.815699
347	1.09664	1.29685	1.33595	1.07006	1.16717	1.23498	1.09918	1.0752	1.39833	1.20372	1.16602	1.20688	1.27231	0.692328	0.603549	0.845946	0.690834	0.573365	0.552142	0.799718	0.80382	0.834321	0.702373	0.601246	0.725246	0.773627	0.757466	0.715181	0.737625	0.908101	1.20802	1.19339	1.30155	1.22309	0.965377				0.0182131	0.29441	0.271138	0.478821	0.183735	0.432179	0.616654	0.716468	0.633332	0.452091	0.678041
348	0.984242	1.15926	1.18848	0.942337	1.04906	1.10016	0.939347	0.922651	1.26063	1.05566	1.01677	1.03531	1.08727	0.522874	0.413204	0.596865	0.454822	0.35278	0.30875	0.557175	0.574986	0.583456	0.464311	0.392991	0.528262	0.559072	0.575188	0.563243	0.524745	0.751066	1.08	1.02864	1.09127	1.11078	0.846359				0.0439802	0.31528	0.282298	0.433659	0.166808	0.454606	0.599846	0.660227	0.619127	0.415833	0.621332
349	0.758594	0.942946	0.956436	0.716682	0.861414	0.921179	0.720017	0.711249	1.09127	0.886634	0.829631	0.840817	0.925881	0.373461	0.24688	0.451558	0.352636	0.2451	0.211926	0.503073	0.546437	0.547073	0.444689	0.414628	0.547545	0.579085	0.64001	0.635469	0.606743	0.846686	1.19695	1.13367	1.21699	1.22346	0.999084				0.283884	0.606838	0.462327	0.662962	0.454328	0.560237	0.586211	0.745437	0.704768	0.389917	0.573461
357	1.4243	1.49105	1.47662	1.24896	1.299	1.21499	1.06813	1.05384	1.29873	1.01557	0.981496	0.997802	0.907469	0.32978	0.228898	0.153469	0.108598	0.142814	0.250422	0.217664	0.271116	0.202289	0.255999	0.433071	0.289692	0.157753	0.18261	0.274116	0.31837	0.0196086	0.31464	0.247358	0.359706	0.634515	0.153782				0.914713	0.430245	0.264465	0.209798	0.441797	0.135994	0.479944	0.364639	0.359705	0.326186	0.471209
358	1.83261	1.99598	1.97078	1.65248	1.73134	1.69648	1.50795	1.45633	1.76559	1.4686	1.33	1.4057	1.41727	0.712001	0.540231	0.602125	0.292223	0.0863733	0.0760803	0.011309	0.154674	0.203633	0.301769	0.464292	0.391913	0.345073	0.407885	0.480624	0.551366	0.308882	0.0207616	0.00668598	0.0813292	0.356188	0.127249				1.44071	1.00962	0.774293	0.682321	0.961537	0.354087	0.108242	0.0246327	0.119591	0.0914689	0.0977422
359	1.60758	1.80312	1.83633	1.51414	1.58866	1.63102	1.47354	1.39506	1.73684	1.53027	1.41338	1.46305	1.55676	0.928299	0.754038	0.895966	0.708001	0.520441	0.392372	0.621896	0.499244	0.454762	0.404217	0.30275	0.33587	0.38599	0.385233	0.282912	0.241881	0.445114	0.82969	0.83159	0.94691	1.16701	0.6897				0.786618	0.47025	0.248188	0.00802811	0.323401	0.0986264	0.599003	0.596923	0.356433	0.325362	0.573086
360	1.4525	1.60843	1.62928	1.32571	1.39955	1.41254	1.23782	1.15631	1.49436	1.28818	1.17579	1.19032	1.26179	0.683182	0.501495	0.548568	0.390263	0.262579	0.130593	0.3201	0.237545	0.243351	0.228566	0.127735	0.189599	0.29837	0.328408	0.202879	0.188114	0.459244	0.846251	0.829953	1.00174	1.29341	0.775351				0.612557	0.297427	0.103426	0.167273	0.089789	0.250993	0.713182	0.747762	0.518627	0.434701	0.645733
361	1.75463	1.91554	1.92206	1.58736	1.64301	1.6376	1.46129	1.35882	1.67076	1.45009	1.30349	1.3256	1.38735	0.787898	0.590297	0.599038	0.397979	0.243023	0.0842121	0.202384	0.0625033	0.0631883	0.0496178	0.0936967	0.0545675	0.0598908	0.0434704	0.106879	0.116311	0.137272	0.488075	0.498224	0.672586	1.00976	0.438676				1.08153	0.735797	0.448058	0.211832	0.475035	0.0171973	0.535836	0.497969	0.269505	0.272405	0.479678
362	1.86606	2.06088	2.09513	1.74187	1.79209	1.82711	1.67736	1.56394	1.88197	1.69226	1.54687	1.58913	1.69441	1.08454	0.891734	0.992548	0.809653	0.612231	0.466179	0.646803	0.478186	0.458671	0.444709	0.310628	0.301002	0.405309	0.381495	0.196074	0.227244	0.409652	0.770864	0.82693	1.03975	1.33275	0.738581				1.0072	0.73333	0.392957	0.0624885	0.354307	0.0398887	0.682124	0.698447	0.368273	0.400937	0.638556
363	1.61068	1.78117	1.82487	1.50225	1.55913	1.59307	1.44599	1.34379	1.67037	1.49708	1.38452	1.40688	1.5045	0.93882	0.762784	0.845508	0.699817	0.562157	0.441513	0.641358	0.532697	0.564576	0.571973	0.456186	0.482753	0.635499	0.661238	0.463883	0.536426	0.766356	1.15427	1.1923	1.47395	1.77248	1.17808				0.449422	0.235987	0.0253221	0.446258	0.202648	0.405371	0.978099	1.09756	0.740024	0.67678	0.893874
364	1.7446	1.87233	1.90169	1.59481	1.6361	1.62964	1.48105	1.37823	1.67346	1.49129	1.3841	1.38941	1.4454	0.912025	0.74181	0.740142	0.572513	0.470882	0.349983	0.480145	0.353232	0.417613	0.446836	0.290632	0.324503	0.509974	0.518226	0.297223	0.369842	0.638632	0.987393	1.01483	1.30887	1.65806	1.02194				0.574432	0.310279	0.020357	0.357629	0.142243	0.410287	0.988214	1.06199	0.754607	0.714176	0.912349
365	1.74806	1.90618	1.92635	1.57513	1.60592	1.60628	1.45717	1.33085	1.61342	1.43143	1.28881	1.30938	1.38371	0.830027	0.643524	0.661949	0.484412	0.338404	0.202315	0.319296	0.15117	0.196831	0.235003	0.0758478	0.0699711	0.256025	0.250954	0.0083235	0.0938839	0.332729	0.675538	0.735201	1.04331	1.43355	0.764687				0.955255	0.702257	0.346548	0.0328129	0.186555	0.13083	0.780514	0.817142	0.477077	0.492286	0.676466
366	1.76231	1.93873	1.98775	1.63763	1.67043	1.70485	1.57583	1.44741	1.74568	1.59128	1.46316	1.48802	1.59304	1.04523	0.863778	0.938688	0.796341	0.646144	0.518267	0.690808	0.548768	0.593795	0.624745	0.498579	0.485764	0.671842	0.684419	0.433314	0.564413	0.76117	1.13113	1.2245	1.58602	1.93978	1.2734				0.566614	0.418771	0.0582148	0.44578	0.22357	0.381919	1.0652	1.1912	0.751624	0.746932	0.94614
367	1.79923	1.92971	1.97946	1.67245	1.70536	1.71411	1.58983	1.48175	1.77099	1.61461	1.52247	1.53374	1.60451	1.08805	0.931597	0.964235	0.815073	0.719135	0.61645	0.767087	0.64143	0.735419	0.779661	0.625346	0.644686	0.872312	0.891003	0.621264	0.775711	1.02156	1.37213	1.4423	1.84695	2.19564	1.51705				0.181095	0.0297133	0.275353	0.799824	0.625912	0.702519	1.32275	1.49059	1.0877	1.03172	1.21415
368	1.58397	1.70168	1.74088	1.42337	1.4403	1.43363	1.30747	1.18343	1.45019	1.30228	1.19691	1.19618	1.25812	0.775085	0.60918	0.590991	0.446784	0.362469	0.25038	0.367885	0.233336	0.333034	0.407786	0.256468	0.268906	0.511767	0.541936	0.274259	0.406175	0.68694	1.0403	1.10011	1.49109	1.92018	1.22559				0.430432	0.239138	0.0833775	0.544074	0.374206	0.537618	1.16096	1.26047	0.884759	0.847822	1.0043
369	1.49265	1.62389	1.66364	1.32919	1.33419	1.32876	1.22344	1.09556	1.3403	1.19351	1.08845	1.10875	1.17071	0.679559	0.528454	0.539778	0.382546	0.283629	0.182231	0.288603	0.12835	0.239824	0.326802	0.164263	0.152073	0.420771	0.443402	0.142108	0.318686	0.578321	0.916211	1.00976	1.45314	1.90642	1.18114				0.54364	0.383561	0.0178444	0.469051	0.314334	0.467615	1.1345	1.22367	0.815198	0.814846	0.940026
370	1.60591	1.71927	1.77239	1.46856	1.47768	1.47059	1.38184	1.27394	1.52108	1.37592	1.30546	1.32985	1.38191	0.892977	0.768334	0.798045	0.639451	0.565534	0.488241	0.607069	0.463337	0.607452	0.687605	0.512418	0.518627	0.81541	0.83741	0.513994	0.745993	1.00342	1.33109	1.43685	1.95195	2.36213	1.62824				0.0604041	0.0395443	0.371389	0.944629	0.826774	0.832264	1.47487	1.64083	1.20615	1.17309	1.28659
371	1.49106	1.57637	1.62421	1.33676	1.34455	1.32223	1.2234	1.11546	1.36022	1.22101	1.15373	1.15958	1.20061	0.743287	0.613201	0.597541	0.448562	0.399004	0.320711	0.429292	0.295537	0.448223	0.544056	0.371409	0.390475	0.693817	0.729973	0.417508	0.624838	0.92183	1.25793	1.33901	1.83882	2.27818	1.54944				0.0444929	0.0825661	0.380552	0.921887	0.811778	0.828217	1.43328	1.58744	1.18458	1.12575	1.23691
372	1.19721	1.28387	1.32318	1.01782	1.00851	0.976704	0.887967	0.768017	0.984395	0.851017	0.774682	0.786161	0.820481	0.38291	0.255638	0.224498	0.0711567	0.0203139	0.056373	0.0266571	0.127819	0.0304929	0.156576	0.0162734	0.0176116	0.304112	0.348905	0.0261912	0.228328	0.540205	0.873161	0.957216	1.45838	1.96591	1.22016				0.36893	0.223095	0.106955	0.601909	0.493101	0.585034	1.21143	1.30439	0.909035	0.881399	0.962838
373	1.33269	1.4277	1.48017	1.17642	1.163	1.13947	1.07423	0.959725	1.16921	1.03882	0.976961	1.00471	1.04139	0.593793	0.484333	0.488318	0.329599	0.274523	0.209499	0.29661	0.136173	0.308948	0.428928	0.247938	0.239072	0.578967	0.610803	0.262798	0.521134	0.800095	1.11208	1.23482	1.79987	2.28538	1.52647				0.117305	0.0346553	0.319679	0.878507	0.788087	0.800721	1.45515	1.57519	1.1365	1.12859	1.19346
374	1.43426	1.50283	1.55742	1.28211	1.27444	1.23963	1.17341	1.07352	1.28785	1.15503	1.11341	1.1347	1.15888	0.718344	0.619758	0.61282	0.452208	0.419888	0.367065	0.456626	0.307755	0.501132	0.618084	0.425101	0.435176	0.790367	0.822343	0.466543	0.743593	1.03858	1.34457	1.46008	2.05738	2.51625	1.75545				0.189506	0.254489	0.564158	1.15846	1.09527	1.02269	1.6387	1.80445	1.37356	1.33246	1.39414
375	1.57321	1.62495	1.68096	1.41153	1.39348	1.35123	1.28594	1.17774	1.38018	1.26108	1.21529	1.22362	1.24314	0.837176	0.729806	0.684611	0.531995	0.508452	0.449352	0.525957	0.369509	0.556015	0.693336	0.504994	0.504989	0.853601	0.894955	0.54468	0.778331	1.09488	1.4026	1.49318	2.04769	2.54135	1.77178				0.186549	0.292076	0.624298	1.17613	1.099	1.10554	1.7369	1.86842	1.45808	1.42326	1.50325
376	1.25575	1.31475	1.36786	1.08486	1.05335	1.00698	0.960698	0.848524	1.0257	0.909738	0.865071	0.888908	0.903465	0.506208	0.412416	0.376558	0.217317	0.190759	0.141389	0.202227	0.0285549	0.226107	0.385332	0.19562	0.177404	0.548762	0.594388	0.228788	0.481829	0.798033	1.09539	1.20317	1.78448	2.32176	1.54195				0.0323829	0.0625405	0.420368	0.952736	0.883896	0.918335	1.56688	1.65715	1.23967	1.2347	1.27821
377	1.2743	1.33373	1.38736	1.10761	1.08211	1.03592	0.989889	0.88419	1.06769	0.944803	0.906609	0.936574	0.951107	0.537335	0.450078	0.434491	0.271139	0.242738	0.199023	0.267355	0.0974204	0.305314	0.450594	0.253926	0.241632	0.623394	0.657898	0.280017	0.578724	0.873315	1.1575	1.2942	1.93165	2.43551	1.65911				0.100856	0.134345	0.476857	1.06929	1.02389	0.953459	1.59526	1.72586	1.28209	1.27372	1.30318
386	1.00421	1.09196	1.12485	0.811426	0.785797	0.741744	0.674848	0.555165	0.736514	0.602392	0.530639	0.559534	0.578021	0.153886	0.0478949	0.0149026	0.157395	0.206042	0.265795	0.214203	0.398488	0.224852	0.0651302	0.251386	0.275851	0.0726989	0.123237	0.220093	0.0200926	0.309812	0.626188	0.704656	1.20517	1.76836	1.00236				0.560293	0.377148	0.0163372	0.417169	0.314226	0.501977	1.14169	1.16999	0.799672	0.805237	0.853289
387	0.98027	1.08088	1.10476	0.775445	0.745903	0.701108	0.629559	0.502858	0.675138	0.53664	0.44961	0.480164	0.496674	0.0723784	0.0385599	0.082965	0.26437	0.321577	0.385845	0.352909	0.55087	0.390034	0.218718	0.40407	0.438736	0.103059	0.0479794	0.376591	0.224221	0.120464	0.438538	0.490791	0.926804	1.51365	0.758008				0.779278	0.532674	0.161054	0.190179	0.0668359	0.378269	1.01595	0.985724	0.658287	0.680236	0.733295
388	0.850234	0.925566	0.946923	0.629777	0.594125	0.53979	0.458118	0.324469	0.492329	0.369994	0.283844	0.28666	0.295544	0.0811592	0.203119	0.301321	0.459478	0.487049	0.556628	0.526386	0.699698	0.540189	0.353489	0.518777	0.538705	0.212065	0.13338	0.433446	0.327013	0.0544865	0.393286	0.41152	0.80814	1.41766	0.68052				0.778101	0.509967	0.170199	0.15364	0.0269546	0.34975	0.952409	0.916094	0.615047	0.606652	0.669876
389	0.925816	0.998156	1.02241	0.721264	0.707209	0.659102	0.56101	0.440671	0.644645	0.510258	0.431128	0.430065	0.448841	0.0398249	0.0878769	0.166785	0.31896	0.347666	0.422247	0.360208	0.507977	0.351327	0.197075	0.361239	0.354995	0.0378893	0.0342872	0.259118	0.130604	0.240647	0.593887	0.618692	1.03651	1.59504	0.866815				0.592157	0.348041	0.0466573	0.329273	0.204431	0.440207	1.01759	1.04201	0.724976	0.682593	0.758844
390	0.962883	1.07498	1.09895	0.771168	0.76786	0.741609	0.634252	0.50812	0.732647	0.586833	0.486431	0.496995	0.538313	0.0840679	0.0581004	0.100258	0.25603	0.318251	0.409887	0.333862	0.480335	0.349613	0.219746	0.373474	0.367641	0.0769387	0.0138384	0.287808	0.16813	0.176165	0.542007	0.576866	0.963373	1.50131	0.7937				0.709106	0.45692	0.145814	0.210773	0.0584039	0.337152	0.926909	0.935339	0.612844	0.586401	0.672603
391	0.75843	0.887467	0.908042	0.550468	0.539369	0.529094	0.399387	0.239756	0.468252	0.345993	0.208803	0.185924	0.247178	0.167014	0.349704	0.44434	0.558029	0.616751	0.74135	0.668385	0.782531	0.685855	0.544223	0.646307	0.635425	0.38484	0.292362	0.503051	0.466794	0.101332	0.298462	0.303805	0.594561	1.17473	0.518153				0.921449	0.634114	0.334856	0.057939	0.240645	0.128159	0.695918	0.644128	0.353227	0.321008	0.420971
392	0.828123	0.933052	0.951619	0.612993	0.611329	0.596032	0.443587	0.284161	0.531635	0.415238	0.279251	0.229884	0.292119	0.10074	0.298918	0.419555	0.509221	0.554932	0.686898	0.59253	0.684394	0.597423	0.468346	0.559628	0.535319	0.301907	0.206602	0.405903	0.379295	0.0111366	0.394522	0.390932	0.680081	1.23508	0.588388				0.839094	0.566848	0.296472	0.0159309	0.162544	0.139724	0.684503	0.677341	0.381823	0.314861	0.438018
393	1.35479	1.46435	1.46309	1.13403	1.16337	1.13125	0.955008	0.825042	1.09935	0.924567	0.787883	0.7632	0.810114	0.325864	0.131948	0.0561005	0.0881074	0.170037	0.304498	0.207193	0.325916	0.251096	0.18166	0.319032	0.2888	0.0780966	0.0374143	0.255598	0.198212	0.120428	0.489708	0.504318	0.808376	1.2618	0.609557				0.896614	0.62707	0.351499	0.00226601	0.180658	0.090559	0.647991	0.688849	0.394482	0.339578	0.49501
394	0.560161	0.759226	0.853098	0.485061	0.504594	0.613992	0.47362	0.283752	0.629982	0.58522	0.424099	0.365809	0.563805	0.16216	0.0959607	0.127155	0.0899257	0.178413	0.362838	0.119351	0.111732	0.111502	0.00365395	0.0541048	0.0907871	0.236935	0.403125	0.316469	0.26728	0.605144	1.1249	1.11804	1.30232	1.83683	1.29644				0.158988	0.0643567	0.295203	0.606262	0.346141	0.625703	1.15144	1.1523	0.78614	0.672638	0.84304
395	1.55359	1.56483	1.72918	1.58637	1.5522	1.55872	1.58866	1.53478	1.74973	1.69953	1.766	1.75591	1.76473	1.46874	1.42598	1.31495	1.19679	1.28739	1.27102	1.35185	1.26414	1.44666	1.61304	1.4441	1.5081	1.79241	1.86289	1.62875	1.6525	2.06691	2.37716	2.3137	2.57701	3.01937	2.35938				1.0004	1.3975	1.69706	1.91527	1.71124	2.15869	2.67622	2.63613	2.44397	2.40004	2.56448
396	1.74037	1.78264	1.86799	1.65907	1.67188	1.65712	1.56693	1.4837	1.74667	1.63279	1.60484	1.56563	1.58801	1.2094	1.08286	0.97151	0.85369	0.871804	0.789834	0.887434	0.809801	0.934802	1.02594	0.874507	0.945663	1.17497	1.22136	1.01121	1.04932	1.41008	1.74526	1.71666	1.99125	2.39351	1.75848				0.34032	0.668821	0.930545	1.23701	1.04087	1.35291	1.86333	1.90001	1.66318	1.5857	1.77176
397	1.41163	1.44137	1.49584	1.29772	1.32127	1.27773	1.17642	1.12275	1.37641	1.21584	1.21079	1.18411	1.16711	0.739877	0.64401	0.554966	0.398269	0.427364	0.367907	0.454449	0.388261	0.540296	0.60318	0.419244	0.522382	0.770457	0.801957	0.586832	0.656871	1.02999	1.34992	1.31262	1.61068	1.96367	1.34525				0.0720801	0.430756	0.627103	0.911174	0.739056	1.03521	1.46744	1.52068	1.34406	1.24175	1.39153
398	1.38321	1.41161	1.46969	1.27957	1.30582	1.26652	1.15633	1.10171	1.36346	1.20694	1.19674	1.15119	1.13199	0.731426	0.622106	0.493351	0.358749	0.397592	0.323306	0.40662	0.364075	0.483169	0.542074	0.388911	0.4994	0.700835	0.740364	0.580745	0.575443	0.955313	1.28014	1.21515	1.41797	1.77615	1.2115				0.00134462	0.406447	0.59991	0.79576	0.59104	0.993147	1.39902	1.38796	1.25904	1.16648	1.33609
399	1.03484	1.0514	1.11417	0.93218	0.966257	0.941554	0.814593	0.745918	1.02871	0.915053	0.892396	0.823916	0.844984	0.510241	0.382032	0.243931	0.174155	0.220512	0.154363	0.282802	0.258986	0.369083	0.479123	0.377778	0.470654	0.682708	0.784576	0.630599	0.603229	1.02406	1.39735	1.31031	1.52024	1.94827	1.38331				0.246311	0.622837	0.771822	0.99585	0.818041	1.1399	1.50946	1.53048	1.37968	1.22773	1.37803
400	1.01906	1.03519	1.07762	0.892951	0.942901	0.909236	0.757523	0.696595	0.989761	0.849628	0.822545	0.754321	0.770144	0.391777	0.259327	0.150844	0.0655398	0.096823	0.0265648	0.164723	0.147675	0.264011	0.333161	0.217618	0.328789	0.542145	0.623503	0.461787	0.482441	0.880618	1.24935	1.18485	1.44155	1.81453	1.25696				0.141458	0.484643	0.589247	0.87031	0.711871	0.92457	1.26189	1.34598	1.18171	1.00122	1.14741
401	0.647224	0.676239	0.726202	0.552862	0.611921	0.596316	0.450679	0.406144	0.712838	0.572532	0.566579	0.501711	0.523491	0.14027	0.025129	0.0515146	0.121776	0.0786827	0.130216	0.0345367	0.0514284	0.171182	0.232647	0.133212	0.267267	0.476981	0.573613	0.43872	0.448461	0.86423	1.2356	1.14919	1.38146	1.7231	1.21281				0.256342	0.634746	0.678606	0.905676	0.751567	0.982554	1.234	1.30815	1.20423	0.992319	1.11265
402	0.609439	0.60981	0.650661	0.497059	0.545814	0.508323	0.363439	0.326385	0.61121	0.466642	0.472746	0.388864	0.381553	0.0361648	0.0693631	0.197802	0.261592	0.193634	0.23922	0.0998769	0.0755704	0.034448	0.109691	0.0154121	0.149412	0.341001	0.442793	0.333354	0.283238	0.72087	1.07802	0.95747	1.11854	1.48053	0.992826				0.102662	0.543157	0.600761	0.734992	0.567528	0.925867	1.15888	1.16154	1.12365	0.936035	1.05476
407	0.688272	0.686537	0.735193	0.551743	0.552798	0.506691	0.394786	0.314225	0.547826	0.465927	0.439257	0.349023	0.350891	0.138471	0.025645	0.203998	0.233113	0.15006	0.187599	0.0902736	0.119551	0.044434	0.159179	0.109428	0.155618	0.339975	0.501183	0.397492	0.223333	0.705011	1.07973	0.913541	0.978382	1.51272	0.988127				0.0127118	0.485279	0.657869	0.704087	0.514797	1.06878	1.41199	1.28526	1.23625	1.12189	1.24762
408	0.40472	0.499947	0.510667	0.211661	0.238346	0.234749	0.049732	0.0894078	0.206935	0.102428	0.0211794	0.111389	0.029258	0.351492	0.550266	0.719934	0.716975	0.712559	0.816819	0.652045	0.659144	0.625091	0.442539	0.436687	0.399807	0.230872	0.0384739	0.130038	0.287587	0.171735	0.620224	0.483767	0.574513	1.13465	0.612452				0.438597	0.0397035	0.109458	0.232684	0.0411681	0.494592	0.856893	0.780784	0.652758	0.503514	0.62391
409	0.870879	0.936991	0.905594	0.582332	0.578832	0.514604	0.316734	0.156796	0.377128	0.242087	0.0978949	0.00909662	0.000657205	0.319934	0.521713	0.765274	0.836863	0.827182	0.954899	0.903458	0.959128	0.894242	0.744726	0.814728	0.775023	0.586908	0.467253	0.600016	0.706616	0.278404	0.111212	0.0143807	0.15218	0.712189	0.133265				1.05056	0.647803	0.424229	0.284196	0.470219	0.0164919	0.458381	0.360495	0.218838	0.138539	0.265296
410	1.11815	1.1539	1.11276	0.816189	0.786532	0.677499	0.514592	0.373385	0.521288	0.376727	0.265948	0.162222	0.0979783	0.162745	0.312317	0.618109	0.734033	0.674181	0.762021	0.787657	0.872595	0.777508	0.592843	0.699462	0.670852	0.465782	0.35751	0.499936	0.639513	0.185375	0.150834	0.0210613	0.121321	0.693818	0.109604				0.995725	0.523347	0.269098	0.221011	0.401128	0.216081	0.653759	0.481493	0.413999	0.378466	0.492304
411	0.603789	0.722362	0.71447	0.373566	0.367762	0.342272	0.175711	0.0184176	0.247751	0.125746	0.0189687	0.100487	0.0637546	0.379444	0.5645	0.793174	0.83773	0.817694	0.920865	0.846785	0.882507	0.835743	0.625643	0.639045	0.623369	0.448461	0.270622	0.360516	0.5508	0.0901755	0.323236	0.181439	0.231078	0.826199	0.298653				0.758439	0.316354	0.10471	0.0640657	0.264303	0.333921	0.739858	0.569051	0.479051	0.404051	0.511378
412	0.678973	0.829138	0.808295	0.419127	0.418108	0.399443	0.211463	0.0315793	0.268361	0.126126	0.0608858	0.125789	0.0730367	0.464717	0.683692	0.872143	0.95739	0.993137	1.1394	1.08931	1.15135	1.09934	0.935693	0.978917	0.957496	0.768487	0.628895	0.746896	0.86398	0.445201	0.024753	0.107564	0.0115786	0.610787	0.0447577				1.16141	0.771189	0.526694	0.414372	0.615891	0.0767327	0.394374	0.250939	0.0897341	0.0369918	0.142333
413	1.06332	1.17323	1.11719	0.728676	0.692578	0.608712	0.428027	0.246168	0.38976	0.226046	0.0491349	0.0223253	0.0639477	0.404109	0.583528	0.845834	1.01307	1.01408	1.12749	1.19141	1.32956	1.22965	1.04574	1.17749	1.1773	0.950607	0.859808	1.03561	1.13582	0.708603	0.37503	0.464723	0.323494	0.287301	0.331926				1.5407	1.10228	0.801048	0.726894	0.900123	0.279006	0.227118	0.0398144	0.0728725	0.0684887	0.0275789
414	0.934384	1.05892	1.02172	0.64133	0.592789	0.521309	0.378284	0.206645	0.323449	0.176588	0.0174733	0.0369035	0.088941	0.384581	0.526651	0.79439	0.963645	0.933423	1.00482	1.07807	1.2176	1.11467	0.871273	0.971587	0.994689	0.770951	0.637694	0.78433	0.95488	0.494874	0.158152	0.292038	0.221489	0.416536	0.163037				1.24523	0.768982	0.47807	0.488815	0.667002	0.0417474	0.512795	0.266147	0.204911	0.214878	0.297334
415	0.622336	0.81356	0.772825	0.339193	0.32408	0.298153	0.123175	0.0617786	0.122285	0.0470392	0.261499	0.283886	0.263456	0.681094	0.86819	1.04874	1.22004	1.26055	1.36992	1.41362	1.53537	1.45062	1.22619	1.29527	1.31083	1.08941	0.932882	1.0595	1.2127	0.768033	0.368661	0.473591	0.394691	0.262464	0.29485				1.40614	0.976668	0.707846	0.690296	0.878414	0.213697	0.260761	0.0276865	0.0789574	0.0855348	0.0205027
416	0.71194	0.861048	0.795751	0.38743	0.369239	0.288268	0.129388	0.0231093	0.123154	0.0797738	0.25711	0.238298	0.268373	0.705627	0.841353	0.983788	1.22989	1.28394	1.34727	1.42124	1.64257	1.5053	1.27092	1.44255	1.48647	1.19074	1.07663	1.31369	1.36879	0.921476	0.578505	0.66106	0.463809	0.207371	0.445113				1.61307	1.19302	0.893864	0.818405	0.958371	0.339935	0.175186	0.0225256	0.147331	0.136089	0.0980884
422	0.117461	0.0813158	0.0791116	0.152702	0.213723	0.333445	0.398106	0.499117	0.396978	0.476033	0.501436	0.531757	0.581729	0.779227	0.849537	1.05771	1.17187	1.09752	1.09546	1.06772	1.20917	1.03907	0.735545	0.846919	0.873284	0.541647	0.352514	0.597613	0.654532	0.126239	0.257834	0.1283	0.386753	1.09948	0.414416				0.665671	0.27632	0.0463186	0.117283	0.0116616	0.456279	0.905299	0.807353	0.653694	0.558366	0.596034
423	0.159877	0.0743169	0.0837279	0.0890828	0.142294	0.279985	0.326563	0.393926	0.288742	0.370852	0.357527	0.377274	0.440604	0.637021	0.680855	0.88052	1.00668	0.914959	0.890591	0.859544	1.00645	0.806507	0.503358	0.643517	0.658741	0.29434	0.113311	0.3923	0.405091	0.137578	0.508238	0.381943	0.701558	1.40266	0.684124				0.37848	0.00266591	0.21527	0.420385	0.34069	0.718739	1.15409	1.09693	0.938752	0.824781	0.851017
424	0.517032	0.474507	0.513158	0.322202	0.28146	0.183102	0.139113	0.0623941	0.206689	0.122383	0.126725	0.111275	0.0783147	0.172202	0.233435	0.398756	0.52318	0.449547	0.450749	0.404529	0.538826	0.336859	0.0760707	0.223993	0.220102	0.141815	0.292784	0.00711056	0.0478289	0.548204	0.914925	0.833856	1.1965	1.85029	1.12356				0.0536884	0.286184	0.521455	0.785305	0.691469	1.01225	1.48639	1.46172	1.25133	1.15089	1.19412
425	0.747934	0.793915	0.874765	0.619223	0.591607	0.590077	0.506941	0.367279	0.590275	0.554785	0.486915	0.423	0.486115	0.231696	0.0755396	0.0858708	0.119775	0.0929567	0.178573	0.0683998	0.135561	0.0258151	0.175083	0.115436	0.136755	0.389684	0.53872	0.352687	0.32525	0.758338	1.17287	1.11552	1.36696	1.97028	1.3317				0.0177187	0.328859	0.58311	0.842939	0.667054	1.01088	1.51622	1.48176	1.22292	1.12684	1.24776
426	0.769984	0.750536	0.826785	0.641688	0.620546	0.582442	0.508306	0.408912	0.616411	0.578648	0.553861	0.489949	0.516611	0.30693	0.189038	0.00269432	0.0419416	0.0220521	0.0223966	0.0769028	0.00415611	0.134488	0.359065	0.279194	0.304952	0.57455	0.733711	0.53698	0.491679	0.966658	1.36354	1.26579	1.50971	2.11243	1.47006				0.277199	0.632291	0.849894	1.07848	0.926862	1.28213	1.73155	1.70113	1.5007	1.37748	1.4878
427	0.963533	0.909162	0.966623	0.805721	0.786854	0.709262	0.638091	0.563029	0.751431	0.677153	0.677194	0.626895	0.612493	0.366921	0.276664	0.0954897	0.000984751	0.0755066	0.0479946	0.118161	0.0222714	0.195955	0.404439	0.267415	0.304648	0.617404	0.744639	0.495966	0.521755	0.995177	1.35899	1.28102	1.60929	2.18527	1.49568				0.289954	0.630983	0.845646	1.12805	1.01079	1.29593	1.74935	1.76232	1.55575	1.43364	1.52689
428	0.786399	0.781201	0.854279	0.664264	0.659596	0.621412	0.544163	0.459714	0.688871	0.614946	0.603083	0.559549	0.58215	0.293036	0.18757	0.0511762	0.0253864	0.0316047	0.00938123	0.0999111	0.028966	0.19358	0.382933	0.267861	0.318199	0.622873	0.757775	0.523492	0.567415	1.02424	1.41569	1.3551	1.69375	2.24852	1.57916				0.361873	0.670593	0.863409	1.17582	1.04872	1.2811	1.72627	1.76688	1.52928	1.38822	1.48257
429	0.847882	0.845218	0.973639	0.830223	0.83597	0.841175	0.794918	0.728993	0.990901	0.960276	0.980277	0.936898	0.989919	0.747794	0.655857	0.530612	0.496423	0.575563	0.553199	0.701284	0.659249	0.809724	1.01675	0.934577	0.991953	1.27295	1.43437	1.23638	1.22681	1.70064	2.10445	2.01082	2.28263	2.8225	2.19552				1.03432	1.37596	1.55141	1.81455	1.6617	1.94304	2.3533	2.37704	2.16966	2.00714	2.12464
430	1.70983	1.678	1.77005	1.63235	1.64855	1.61487	1.51905	1.4464	1.69735	1.63249	1.622	1.54408	1.5615	1.30812	1.18314	1.00386	0.940523	1.00322	0.940481	1.03967	0.984684	1.11212	1.25142	1.1341	1.20446	1.44036	1.53312	1.34176	1.33707	1.75561	2.11185	2.0451	2.30206	2.77214	2.14796				0.86586	1.20447	1.41913	1.70695	1.5373	1.81704	2.26748	2.30448	2.09321	1.96489	2.13629
431	1.43874	1.41147	1.45237	1.27041	1.28782	1.22539	1.08864	1.00404	1.24932	1.13755	1.10072	1.02199	1.02288	0.701967	0.563337	0.398557	0.303493	0.342098	0.266491	0.35839	0.292707	0.429186	0.539167	0.397971	0.472911	0.723511	0.796961	0.579929	0.627999	1.02919	1.38293	1.34227	1.6617	2.11071	1.46765				0.181907	0.482717	0.671621	1.02062	0.88099	1.06652	1.51054	1.59778	1.36613	1.22718	1.37914
432	1.06749	1.06541	1.12827	0.953517	0.98537	0.953438	0.828892	0.758231	1.03365	0.929803	0.91043	0.845211	0.869339	0.537702	0.412101	0.287577	0.212439	0.257656	0.1982	0.328546	0.291003	0.429977	0.545576	0.427136	0.516512	0.769552	0.869326	0.671333	0.713911	1.13256	1.51016	1.45448	1.76271	2.20245	1.59091				0.408649	0.719154	0.857528	1.18482	1.04492	1.21905	1.60644	1.69991	1.4873	1.31311	1.44782
433	1.27161	1.21808	1.30369	1.20008	1.23001	1.18535	1.08604	1.04693	1.30464	1.21616	1.24318	1.16529	1.15863	0.885676	0.793202	0.632172	0.558251	0.647637	0.613474	0.719701	0.693924	0.8472	0.965481	0.832826	0.94049	1.18931	1.28027	1.09626	1.11206	1.5498	1.89849	1.81592	2.0839	2.50158	1.91029				0.802591	1.17031	1.30224	1.56636	1.41925	1.66256	2.01256	2.07551	1.92478	1.75316	1.89598
434	1.49604	1.45872	1.52637	1.3951	1.44019	1.4045	1.26077	1.19743	1.47951	1.39109	1.37278	1.27753	1.29876	1.01274	0.874744	0.718186	0.662113	0.716014	0.649021	0.776317	0.752165	0.871984	0.96781	0.856877	0.956075	1.17426	1.26234	1.08957	1.10568	1.51138	1.87875	1.8181	2.08924	2.49642	1.9151				0.732527	1.04325	1.17117	1.50005	1.34941	1.50453	1.8753	1.9841	1.7795	1.5919	1.76433
435	1.3048	1.31184	1.38112	1.21867	1.28087	1.2727	1.11626	1.04704	1.3644	1.26918	1.23549	1.15533	1.20857	0.875105	0.724757	0.622735	0.574124	0.602446	0.530941	0.697888	0.683173	0.797582	0.880001	0.783855	0.885077	1.10393	1.20045	1.02657	1.07413	1.4621	1.85145	1.8114	2.11845	2.50189	1.93257				0.757213	1.01338	1.10352	1.49341	1.35439	1.4001	1.75514	1.9195	1.67498	1.45575	1.62377
436	0.985867	0.981985	1.0513	0.910172	0.972949	0.959075	0.812199	0.763183	1.07406	0.969085	0.96264	0.882976	0.91764	0.584905	0.46012	0.361068	0.30677	0.357304	0.305404	0.46718	0.470531	0.599716	0.6751	0.571396	0.694548	0.918356	1.01399	0.85293	0.895007	1.30211	1.67865	1.61769	1.90636	2.26541	1.72146				0.674795	0.984215	1.03597	1.36303	1.22833	1.32272	1.61237	1.75356	1.57406	1.34443	1.4882
437	0.901221	0.884767	0.9446	0.818495	0.897368	0.885699	0.707926	0.65782	0.984482	0.890431	0.867814	0.766996	0.815294	0.515361	0.371622	0.257182	0.230831	0.276206	0.218997	0.395735	0.410997	0.510511	0.589378	0.514625	0.633025	0.825096	0.938953	0.807988	0.803888	1.21742	1.60983	1.52868	1.76725	2.13618	1.62613				0.633586	0.951462	0.976292	1.27987	1.13997	1.238	1.49323	1.63155	1.46752	1.21374	1.37067
444	0.656418	0.689859	0.698837	0.529827	0.623168	0.598799	0.390024	0.358258	0.687194	0.508583	0.475874	0.381182	0.398498	0.00360769	0.149332	0.217015	0.271459	0.260615	0.334144	0.147489	0.0972048	0.0459857	0.05221	0.110585	0.0383133	0.151101	0.234746	0.183012	0.119983	0.495693	0.858425	0.752542	0.867587	1.12412	0.731296				0.0859869	0.324742	0.305037	0.454386	0.27507	0.541313	0.6916	0.746356	0.714506	0.480329	0.628025
445	0.763731	0.826735	0.819939	0.638523	0.761661	0.750352	0.499415	0.466558	0.830412	0.640518	0.571777	0.46422	0.504548	0.106602	0.0748369	0.136193	0.158273	0.182567	0.274341	0.0544556	0.00625587	0.0172776	0.0283648	0.0316338	0.096281	0.130351	0.23702	0.246513	0.0855298	0.445888	0.824909	0.689288	0.68426	0.944951	0.620999				0.163601	0.264547	0.245077	0.328795	0.118037	0.463777	0.593505	0.603255	0.598956	0.361922	0.541344
446	0.450499	0.465785	0.480686	0.356393	0.470092	0.465104	0.230401	0.207897	0.55527	0.412614	0.382751	0.246982	0.285755	0.0237595	0.172005	0.259041	0.255832	0.228689	0.282593	0.0802143	0.00240618	0.0116117	0.024148	0.0097707	0.154107	0.21972	0.334897	0.335017	0.19003	0.582511	0.947709	0.797703	0.813185	1.08088	0.756641				0.081484	0.53074	0.47625	0.545197	0.361192	0.679626	0.75398	0.775232	0.803673	0.543189	0.696914
447	0.50717	0.544815	0.567981	0.43759	0.559327	0.567991	0.342581	0.327547	0.682897	0.53318	0.509973	0.396045	0.439368	0.0864671	0.0542531	0.0954856	0.112989	0.0957946	0.147766	0.0632546	0.144144	0.176653	0.15446	0.124093	0.285368	0.359966	0.452638	0.442407	0.35371	0.716589	1.07427	0.954887	1.01984	1.2235	0.909587				0.232824	0.645253	0.556513	0.680893	0.504587	0.720081	0.773271	0.853445	0.855312	0.572567	0.731056
448	0.821934	0.903413	0.918652	0.766609	0.90554	0.926839	0.690141	0.684177	1.04939	0.872895	0.834221	0.735631	0.777533	0.377771	0.225942	0.227716	0.193542	0.170804	0.104727	0.32668	0.408762	0.393486	0.320495	0.306786	0.46405	0.469146	0.54086	0.575274	0.446314	0.752615	1.10141	0.987379	0.973688	1.11092	0.866539				0.167062	0.572071	0.486883	0.5849	0.370304	0.621618	0.667716	0.732984	0.742061	0.468586	0.670877
449	0.689028	0.747079	0.749295	0.6239	0.768905	0.783069	0.523069	0.52158	0.879352	0.712706	0.669422	0.534611	0.575291	0.234957	0.0765702	0.0444798	0.0415733	0.0285065	0.0355206	0.17995	0.277653	0.233763	0.171738	0.185734	0.338666	0.311664	0.401939	0.470439	0.282099	0.603514	0.951961	0.806578	0.722977	0.888024	0.678609				0.0704937	0.513453	0.420504	0.448277	0.23314	0.552498	0.558803	0.579815	0.637442	0.363475	0.557482
450	0.599201	0.655696	0.657433	0.544893	0.710709	0.734262	0.459287	0.461041	0.842508	0.690788	0.641847	0.5146	0.578892	0.249035	0.0916258	0.0754295	0.0810861	0.0683624	0.0186379	0.250479	0.343727	0.312642	0.268361	0.280675	0.429122	0.422618	0.527756	0.576849	0.411608	0.742703	1.10429	0.959781	0.91285	1.07874	0.859468				0.277911	0.692474	0.559854	0.638951	0.448504	0.666536	0.648089	0.73089	0.763928	0.446099	0.638676
451	0.788713	0.861597	0.876677	0.760755	0.915401	0.947988	0.700546	0.710228	1.07212	0.912117	0.88366	0.767985	0.814562	0.450978	0.312035	0.324971	0.303628	0.292029	0.242092	0.457022	0.561485	0.547315	0.445025	0.435903	0.610594	0.59304	0.652862	0.710939	0.590623	0.869877	1.19971	1.08941	1.0568	1.12581	0.946893				0.368506	0.763044	0.611932	0.706609	0.505183	0.675446	0.633255	0.741843	0.771844	0.459971	0.668833
452	0.528448	0.620745	0.649329	0.546147	0.700452	0.758347	0.527931	0.549436	0.902798	0.761873	0.75392	0.63227	0.681697	0.356571	0.239944	0.266092	0.262738	0.267934	0.238874	0.447876	0.577628	0.556798	0.448991	0.457256	0.644145	0.604429	0.667458	0.763672	0.608191	0.891209	1.20221	1.07185	0.97657	1.03547	0.910441				0.450327	0.894305	0.737165	0.735483	0.522579	0.792695	0.695136	0.737196	0.837542	0.542171	0.727886
[truncated: 241 more columns]

## Sheet: 1otu (E148Q)-1ots (WT)
Res. #	35	36	37	38	39	40	41	42	43	44	45	46	47	48	49	50	51	52	53	54	55	56	57	58	59	60	61	62	63	64	65	66	67	68	69				75	76	77	78	79	80	81	82	83	84	85
35	0	0.00158164	0.199512	0.063507	0.221674	0.0116807	0.00518588	0.168075	0.0787032	0.0289383	0.251148	0.30898	0.46589	0.564262	0.515004	0.29167	0.318718	0.709337	0.560456	0.570046	0.360699	0.555882	0.433446	0.850946	0.699023	0.839342	0.68604	0.707586	0.857206	0.905148	1.29034	1.26678	0.769172	0.888238	0.425182				1.0437	0.715493	0.765027	0.585391	0.843198	1.0419	0.83054	1.25965	0.896644	0.803472	0.615184
36	0.00158164	0	0.00675371	0.0470028	0.226841	0.00119147	0.0146811	0.0461947	0.042176	0.07931	0.104083	0.116208	0.326644	0.445202	0.331544	0.124094	0.198643	0.544347	0.385378	0.413425	0.200444	0.375271	0.277865	0.727327	0.546022	0.664201	0.528416	0.573134	0.709788	0.709259	1.10534	1.13695	0.621223	0.747274	0.24083				0.860001	0.523031	0.554805	0.393229	0.659477	0.8513	0.662776	1.07971	0.715875	0.627697	0.454526
37	0.199512	0.00675371	0	0.0137813	0.309181	0.207898	0.106141	0.128182	0.163746	0.131043	0.213905	0.236223	0.432636	0.558031	0.46592	0.313125	0.393416	0.692769	0.513716	0.590152	0.376751	0.492614	0.40411	0.905439	0.700003	0.799192	0.698816	0.751915	0.871576	0.876757	1.1733	1.21034	0.773533	0.903554	0.45667				1.00477	0.657473	0.680796	0.545242	0.79835	0.968207	0.794601	1.23664	0.826709	0.733378	0.590521
38	0.063507	0.0470028	0.0137813	0	0.0304467	0.113767	0.0890205	0.00871649	0.0403191	0.0493236	0.103546	0.109215	0.252063	0.399962	0.342182	0.134867	0.17533	0.549286	0.359203	0.394743	0.203869	0.354915	0.218574	0.678703	0.525071	0.64152	0.503215	0.541188	0.688143	0.72281	1.0195	1.0254	0.587087	0.696739	0.282975				0.824175	0.488942	0.536908	0.378163	0.619561	0.808216	0.622029	1.06093	0.657975	0.576805	0.419935
39	0.221674	0.226841	0.309181	0.0304467	0	0.00438467	0.00201914	0.13318	0.153219	0.129093	0.0153516	0.0414509	0.239328	0.365511	0.179024	0.0278369	0.0656699	0.415906	0.218144	0.265293	0.0791108	0.231949	0.103611	0.565377	0.406499	0.501951	0.361897	0.418445	0.548982	0.550005	0.970166	0.99627	0.452511	0.57407	0.105424				0.685941	0.333719	0.373489	0.217335	0.466968	0.648646	0.463895	0.889269	0.50256	0.409584	0.24471
40	0.0116807	0.00119147	0.207898	0.113767	0.00438467	0	0.00822979	0.14596	0.071882	0.110091	0.0492384	0.0487979	0.219243	0.371589	0.199557	0.0705797	0.176392	0.45908	0.274903	0.364088	0.153915	0.266468	0.186806	0.695072	0.485864	0.572544	0.477146	0.539837	0.654648	0.636298	0.973624	1.04089	0.561328	0.69506	0.220847				0.781536	0.428994	0.443056	0.314325	0.572616	0.738666	0.574519	1.00684	0.602416	0.511336	0.370837
41	0.00518588	0.0146811	0.106141	0.0890205	0.00201914	0.00822979	0	0.0173155	0.146073	0.130638	0.113885	0.126053	0.279906	0.45581	0.371253	0.249908	0.300851	0.606196	0.404293	0.495934	0.295038	0.386688	0.281719	0.790926	0.599785	0.693189	0.599156	0.646102	0.770218	0.790105	1.02525	1.063	0.666351	0.788235	0.389437				0.89235	0.546668	0.571494	0.445485	0.687506	0.851251	0.686257	1.13976	0.706501	0.619687	0.492257
42	0.168075	0.0461947	0.128182	0.00871649	0.13318	0.14596	0.0173155	0	0.000939157	0.0550925	0.109694	0.12734	0.264163	0.427487	0.339869	0.144519	0.153683	0.54853	0.365641	0.39741	0.204083	0.366497	0.227225	0.669372	0.525585	0.645619	0.505634	0.532764	0.681383	0.720497	1.04812	1.05749	0.586053	0.699067	0.272405				0.832227	0.496522	0.538363	0.382888	0.630018	0.815779	0.630109	1.06954	0.670957	0.588161	0.429041
43	0.0787032	0.042176	0.163746	0.0403191	0.153219	0.071882	0.146073	0.000939157	0	0.00794489	0.111973	0.0652643	0.417564	0.56775	0.319027	0.154724	0.244499	0.583119	0.401009	0.451394	0.254505	0.412272	0.305594	0.767944	0.596399	0.692191	0.563545	0.61714	0.750735	0.731826	1.13811	1.20519	0.661937	0.785627	0.285835				0.87737	0.529743	0.554934	0.410951	0.668434	0.849088	0.683056	1.09895	0.712274	0.63065	0.478492
44	0.0289383	0.07931	0.131043	0.0493236	0.129093	0.110091	0.130638	0.0550925	0.00794489	0	0.00128337	0.0746524	0.109946	0.475638	0.270074	0.170272	0.258793	0.561986	0.359106	0.437843	0.244992	0.357876	0.268152	0.775907	0.583527	0.671523	0.572893	0.632372	0.768499	0.740765	0.998334	1.10381	0.673391	0.790335	0.330106				0.859909	0.52048	0.535075	0.41198	0.662718	0.836907	0.695094	1.11726	0.701152	0.636847	0.516169
45	0.251148	0.104083	0.213905	0.103546	0.0153516	0.0492384	0.113885	0.109694	0.111973	0.00128337	0	0.0183122	0.0762615	0.220966	0.253878	0.127136	0.049337	0.449583	0.274674	0.313396	0.106643	0.25106	0.130629	0.58147	0.425803	0.556772	0.440392	0.450302	0.609269	0.65463	0.855085	0.892996	0.514299	0.622753	0.218718				0.74816	0.428154	0.455384	0.317428	0.569186	0.752146	0.584793	1.0306	0.6191	0.554349	0.417976
46	0.30898	0.116208	0.236223	0.109215	0.0414509	0.0487979	0.126053	0.12734	0.0652643	0.0746524	0.0183122	0	0.0151594	0.271178	0.177687	0.00127152	0.0749928	0.392582	0.262088	0.250102	0.0443361	0.262577	0.129842	0.520561	0.393119	0.538414	0.387419	0.389409	0.556678	0.596741	0.954303	0.982187	0.476993	0.590211	0.118894				0.729912	0.408332	0.439622	0.281003	0.547153	0.742776	0.559013	0.986461	0.615709	0.544527	0.37602
47	0.46589	0.326644	0.432636	0.252063	0.239328	0.219243	0.279906	0.264163	0.417564	0.109946	0.0762615	0.0151594	0	0.0327752	0.168054	0.00240312	0.152967	0.0949849	0.0742029	0.182938	0.149586	0.00725889	0.0221158	0.464864	0.203432	0.337904	0.28399	0.274207	0.383225	0.399472	0.757452	0.823205	0.318831	0.480762	0.0603793				0.603136	0.274808	0.247246	0.132342	0.442916	0.598933	0.423166	0.869072	0.510845	0.409548	0.254555
48	0.564262	0.445202	0.558031	0.399962	0.365511	0.371589	0.45581	0.427487	0.56775	0.475638	0.220966	0.271178	0.0327752	0	0.0221162	0.306307	0.0347862	0.146586	0.100792	0.242103	0.107438	0.0407037	0.0192121	0.45432	0.176051	0.303134	0.280446	0.258161	0.364614	0.402612	0.574399	0.644546	0.279011	0.429729	0.0272735				0.543175	0.223344	0.193889	0.101409	0.397462	0.543166	0.385689	0.855251	0.457187	0.368884	0.250593
49	0.515004	0.331544	0.46592	0.342182	0.179024	0.199557	0.371253	0.339869	0.319027	0.270074	0.253878	0.177687	0.168054	0.0221162	0	0.00178315	0.317399	0.188302	0.0152905	0.0130738	0.169727	0.0186923	0.140667	0.257676	0.158359	0.305795	0.164571	0.153113	0.339576	0.39416	0.617922	0.669474	0.253057	0.350648	0.0596322				0.487921	0.177722	0.206364	0.0618551	0.31913	0.512566	0.347334	0.784508	0.389209	0.341098	0.199022
50	0.29167	0.124094	0.313125	0.134867	0.0278369	0.0705797	0.249908	0.144519	0.154724	0.170272	0.127136	0.00127152	0.00240312	0.306307	0.00178315	0	0.0203399	0.443789	0.286309	0.269941	0.140627	0.346504	0.165629	0.560952	0.473072	0.565241	0.398511	0.437221	0.605249	0.580391	1.01139	1.11247	0.518889	0.620349	0.124175				0.706496	0.366375	0.397086	0.252634	0.502597	0.693351	0.547687	0.948664	0.559131	0.506271	0.366233
51	0.318718	0.198643	0.393416	0.17533	0.0656699	0.176392	0.300851	0.153683	0.244499	0.258793	0.049337	0.0749928	0.152967	0.0347862	0.317399	0.0203399	0	0.0233477	0.11287	0.121931	0.0307847	0.0132431	0.0315877	0.517137	0.314145	0.347048	0.295057	0.367977	0.481524	0.41108	0.739265	0.923106	0.398407	0.527493	0.0397653				0.573986	0.220879	0.20666	0.112953	0.370829	0.518714	0.403743	0.817146	0.394819	0.332411	0.234952
52	0.709337	0.544347	0.692769	0.549286	0.415906	0.45908	0.606196	0.54853	0.583119	0.561986	0.449583	0.392582	0.0949849	0.146586	0.188302	0.443789	0.0233477	0	0.00258821	0.0220552	0.292544	0.211422	0.251257	0.137958	0.0233381	0.121814	0.0529948	0.00895104	0.18136	0.225708	0.32786	0.439613	0.0938522	0.202351	0.208582				0.317384	0.0163082	0.00878509	0.0968181	0.179636	0.35046	0.214196	0.661549	0.261656	0.222512	0.121621
53	0.560456	0.385378	0.513716	0.359203	0.218144	0.274903	0.404293	0.365641	0.401009	0.359106	0.274674	0.262088	0.0742029	0.100792	0.0152905	0.286309	0.11287	0.00258821	0	0.00140845	0.108863	0.0675299	0.160653	0.160345	0.133141	0.279065	0.136939	0.0953938	0.279364	0.352513	0.681005	0.730549	0.21004	0.318963	0.104933				0.471885	0.150885	0.167429	0.0330845	0.299423	0.47747	0.311566	0.75814	0.365027	0.304841	0.162002
54	0.570046	0.413425	0.590152	0.394743	0.265293	0.364088	0.495934	0.39741	0.451394	0.437843	0.313396	0.250102	0.182938	0.242103	0.0130738	0.269941	0.121931	0.0220552	0.00140845	0	0.015011	0.0861142	0.0628867	0.288376	0.194426	0.241245	0.12238	0.152613	0.300755	0.239968	0.736872	0.900159	0.230874	0.349553	0.189452				0.42089	0.077573	0.0718353	0.0445996	0.230243	0.397466	0.271371	0.668706	0.293577	0.241189	0.119731
55	0.360699	0.200444	0.376751	0.203869	0.0791108	0.153915	0.295038	0.204083	0.254505	0.244992	0.106643	0.0443361	0.149586	0.107438	0.169727	0.140627	0.0307847	0.292544	0.108863	0.015011	0	0.00759434	0.0578404	0.506247	0.359734	0.403587	0.379343	0.390552	0.544657	0.482557	0.674873	0.923425	0.463556	0.576202	0.0871726				0.62101	0.299775	0.272469	0.191748	0.458038	0.611001	0.52359	0.926578	0.508907	0.480728	0.419871
56	0.555882	0.375271	0.492614	0.354915	0.231949	0.266468	0.386688	0.366497	0.412272	0.357876	0.25106	0.262577	0.00725889	0.0407037	0.0186923	0.346504	0.0132431	0.211422	0.0675299	0.0861142	0.00759434	0	0.0166871	0.0867336	0.0620264	0.333245	0.27382	0.100533	0.311298	0.45435	0.521043	0.608357	0.257059	0.374732	0.0224014				0.537212	0.248242	0.228805	0.134225	0.421717	0.581918	0.445186	0.914246	0.510406	0.469937	0.389755
57	0.433446	0.277865	0.40411	0.218574	0.103611	0.186806	0.281719	0.227225	0.305594	0.268152	0.130629	0.129842	0.0221158	0.0192121	0.140667	0.165629	0.0315877	0.251257	0.160653	0.0628867	0.0578404	0.0166871	0	0.0237739	0.15111	0.294938	0.283014	0.16707	0.30309	0.410158	0.930578	0.976197	0.296369	0.451426	0.00750076				0.609702	0.25843	0.237073	0.141252	0.422125	0.548818	0.392019	0.86271	0.44425	0.343071	0.215885
58	0.850946	0.727327	0.905439	0.678703	0.565377	0.695072	0.790926	0.669372	0.767944	0.775907	0.58147	0.520561	0.464864	0.45432	0.257676	0.560952	0.517137	0.137958	0.160345	0.288376	0.506247	0.0867336	0.0237739	0	0.00481187	0.26981	0.252319	0.149057	0.0690139	0.241301	0.323179	0.653444	0.129843	0.00650661	0.506853				0.0382888	0.32974	0.385239	0.445501	0.164213	0.0534669	0.135112	0.255606	0.131529	0.175796	0.234801
59	0.699023	0.546022	0.700003	0.525071	0.406499	0.485864	0.599785	0.525585	0.596399	0.583527	0.425803	0.393119	0.203432	0.176051	0.158359	0.473072	0.314145	0.0233381	0.133141	0.194426	0.359734	0.0620264	0.15111	0.00481187	0	0.00623307	0.210546	0.0567751	0.201885	0.197338	0.17373	0.503462	0.124271	0.247167	0.163758				0.315685	0.00997037	0.0561232	0.0870418	0.197042	0.309277	0.245981	0.677985	0.258759	0.238085	0.246234
60	0.839342	0.664201	0.799192	0.64152	0.501951	0.572544	0.693189	0.645619	0.692191	0.671523	0.556772	0.538414	0.337904	0.303134	0.305795	0.565241	0.347048	0.121814	0.279065	0.241245	0.403587	0.333245	0.294938	0.26981	0.00623307	0	0.0321883	0.305651	0.0786814	0.145272	0.237099	0.408998	0.0776313	0.020482	0.305467				0.202511	0.0911592	0.119195	0.194249	0.0913039	0.235156	0.129095	0.597612	0.194159	0.186918	0.17351
61	0.68604	0.528416	0.698816	0.503215	0.361897	0.477146	0.599156	0.505634	0.563545	0.572893	0.440392	0.387419	0.28399	0.280446	0.164571	0.398511	0.295057	0.0529948	0.136939	0.12238	0.379343	0.27382	0.283014	0.252319	0.210546	0.0321883	0	0.0134061	0.15844	0.0239293	0.877788	1.1049	0.143417	0.229574	0.26286				0.280183	0.0814063	0.105529	0.18678	0.0679714	0.199588	0.139948	0.501277	0.0981325	0.0955289	0.0649401
62	0.707586	0.573134	0.751915	0.541188	0.418445	0.539837	0.646102	0.532764	0.61714	0.632372	0.450302	0.389409	0.274207	0.258161	0.153113	0.437221	0.367977	0.00895104	0.0953938	0.152613	0.390552	0.100533	0.16707	0.149057	0.0567751	0.305651	0.0134061	0	0.00956781	0.272749	0.0401886	0.832845	0.0230155	0.154792	0.303653				0.142277	0.208988	0.310512	0.308442	0.0422728	0.0229593	0.0167204	0.353186	0.039266	0.0389351	0.0140422
63	0.857206	0.709788	0.871576	0.688143	0.548982	0.654648	0.770218	0.681383	0.750735	0.768499	0.609269	0.556678	0.383225	0.364614	0.339576	0.605249	0.481524	0.18136	0.279364	0.300755	0.544657	0.311298	0.30309	0.0690139	0.201885	0.0786814	0.15844	0.00956781	0	0.00574615	0.436721	0.22398	0.0964996	0.0283925	0.175645				0.0538758	0.251367	0.332185	0.306957	0.0687138	0.00299211	0.00215525	0.39164	0.0335685	0.0023227	0.150668
64	0.905148	0.709259	0.876757	0.72281	0.550005	0.636298	0.790105	0.720497	0.731826	0.740765	0.65463	0.596741	0.399472	0.402612	0.39416	0.580391	0.41108	0.225708	0.352513	0.239968	0.482557	0.45435	0.410158	0.241301	0.197338	0.145272	0.0239293	0.272749	0.00574615	0	0.0120576	0.629301	0.039346	0.182173	0.450317				0.0198099	0.222266	0.216221	0.329046	0.0660252	0.155871	0.198431	0.463605	0.149443	0.331831	0.521974
65	1.29034	1.10534	1.1733	1.0195	0.970166	0.973624	1.02525	1.04812	1.13811	0.998334	0.855085	0.954303	0.757452	0.574399	0.617922	1.01139	0.739265	0.32786	0.681005	0.736872	0.674873	0.521043	0.930578	0.323179	0.17373	0.237099	0.877788	0.0401886	0.436721	0.0120576	0	0.000853295	0.601511	0.0100029	1.20561				0.274001	0.084378	0.263646	0.0779341	0.618797	0.522016	0.445883	1.10265	0.923771	0.702031	0.815371
66	1.26678	1.13695	1.21034	1.0254	0.99627	1.04089	1.063	1.05749	1.20519	1.10381	0.892996	0.982187	0.823205	0.644546	0.669474	1.11247	0.923106	0.439613	0.730549	0.900159	0.923425	0.608357	0.976197	0.653444	0.503462	0.408998	1.1049	0.832845	0.22398	0.629301	0.000853295	0	0.0286375	0.663568	0.0504976				0.461513	0.170243	0.205617	0.197302	0.667427	0.439668	0.465163	1.08026	0.733274	0.516674	0.761032
67	0.769172	0.621223	0.773533	0.587087	0.452511	0.561328	0.666351	0.586053	0.661937	0.673391	0.514299	0.476993	0.318831	0.279011	0.253057	0.518889	0.398407	0.0938522	0.21004	0.230874	0.463556	0.257059	0.296369	0.129843	0.124271	0.0776313	0.143417	0.0230155	0.0964996	0.039346	0.601511	0.0286375	0	0.0181227	0.316245				0.136767	0.170213	0.324828	0.158528	0.00826254	0.0452513	0.0566752	0.263243	0.04438	0.0153101	0.261383
68	0.888238	0.747274	0.903554	0.696739	0.57407	0.69506	0.788235	0.699067	0.785627	0.790335	0.622753	0.590211	0.480762	0.429729	0.350648	0.620349	0.527493	0.202351	0.318963	0.349553	0.576202	0.374732	0.451426	0.00650661	0.247167	0.020482	0.229574	0.154792	0.0283925	0.182173	0.0100029	0.663568	0.0181227	0	0.00522416				0.00845306	0.376006	0.630537	0.458023	0.142773	0.267326	0.130151	0.0426541	0.131932	0.0965303	0.143885
69	0.425182	0.24083	0.45667	0.282975	0.105424	0.220847	0.389437	0.272405	0.285835	0.330106	0.218718	0.118894	0.0603793	0.0272735	0.0596322	0.124175	0.0397653	0.208582	0.104933	0.189452	0.0871726	0.0224014	0.00750076	0.506853	0.163758	0.305467	0.26286	0.303653	0.175645	0.450317	1.20561	0.0504976	0.316245	0.00522416	0				0.0447936	0.093401	0.189189	0.168058	0.113774	0.0138252	0.268935	0.0859846	0.0785699	0.187819	0.331721
75	1.0437	0.860001	1.00477	0.824175	0.685941	0.781536	0.89235	0.832227	0.87737	0.859909	0.74816	0.729912	0.603136	0.543175	0.487921	0.706496	0.573986	0.317384	0.471885	0.42089	0.62101	0.537212	0.609702	0.0382888	0.315685	0.202511	0.280183	0.142277	0.0538758	0.0198099	0.274001	0.461513	0.136767	0.00845306	0.0447936				0	0.0216946	0.193926	0.296428	0.268894	0.0513434	0.262663	0.152413	0.275016	0.353756	0.46034
76	0.715493	0.523031	0.657473	0.488942	0.333719	0.428994	0.546668	0.496522	0.529743	0.52048	0.428154	0.408332	0.274808	0.223344	0.177722	0.366375	0.220879	0.0163082	0.150885	0.077573	0.299775	0.248242	0.25843	0.32974	0.00997037	0.0911592	0.0814063	0.208988	0.251367	0.222266	0.084378	0.170243	0.170213	0.376006	0.093401				0.0216946	0	0.00176315	0.0786728	0.116329	0.239102	0.0879528	0.568746	0.0770618	0.0638329	0.109649
77	0.765027	0.554805	0.680796	0.536908	0.373489	0.443056	0.571494	0.538363	0.554934	0.535075	0.455384	0.439622	0.247246	0.193889	0.206364	0.397086	0.20666	0.00878509	0.167429	0.0718353	0.272469	0.228805	0.237073	0.385239	0.0561232	0.119195	0.105529	0.310512	0.332185	0.216221	0.263646	0.205617	0.324828	0.630537	0.189189				0.193926	0.00176315	0	0.0362853	0.00017342	0.018932	0.0582234	0.36489	0.0974229	0.304388	0.311435
78	0.585391	0.393229	0.545242	0.378163	0.217335	0.314325	0.445485	0.382888	0.410951	0.41198	0.317428	0.281003	0.132342	0.101409	0.0618551	0.252634	0.112953	0.0968181	0.0330845	0.0445996	0.191748	0.134225	0.141252	0.445501	0.0870418	0.194249	0.18678	0.308442	0.306957	0.329046	0.0779341	0.197302	0.158528	0.458023	0.168058				0.296428	0.0786728	0.0362853	0	0.0140201	0.0371876	0.109581	0.482124	0.0450318	0.155142	0.179882
79	0.843198	0.659477	0.79835	0.619561	0.466968	0.572616	0.687506	0.630018	0.668434	0.662718	0.569186	0.547153	0.442916	0.397462	0.31913	0.502597	0.370829	0.179636	0.299423	0.230243	0.458038	0.421717	0.422125	0.164213	0.197042	0.0913039	0.0679714	0.0422728	0.0687138	0.0660252	0.618797	0.667427	0.00826254	0.142773	0.113774				0.268894	0.116329	0.00017342	0.0140201	0	0.00558076	0.0279482	0.490161	0.0377808	0.135137	0.158503
80	1.0419	0.8513	0.968207	0.808216	0.648646	0.738666	0.851251	0.815779	0.849088	0.836907	0.752146	0.742776	0.598933	0.543166	0.512566	0.693351	0.518714	0.35046	0.47747	0.397466	0.611001	0.581918	0.548818	0.0534669	0.309277	0.235156	0.199588	0.0229593	0.00299211	0.155871	0.522016	0.439668	0.0452513	0.267326	0.0138252				0.0513434	0.239102	0.018932	0.0371876	0.00558076	0	0.00218357	0.217268	0.171198	0.297014	0.327101
81	0.83054	0.662776	0.794601	0.622029	0.463895	0.574519	0.686257	0.630109	0.683056	0.695094	0.584793	0.559013	0.423166	0.385689	0.347334	0.547687	0.403743	0.214196	0.311566	0.271371	0.52359	0.445186	0.392019	0.135112	0.245981	0.129095	0.139948	0.0167204	0.00215525	0.198431	0.445883	0.465163	0.0566752	0.130151	0.268935				0.262663	0.0879528	0.0582234	0.109581	0.0279482	0.00218357	0	0.020498	0.130286	0.0096257	0.227825
82	1.25965	1.07971	1.23664	1.06093	0.889269	1.00684	1.13976	1.06954	1.09895	1.11726	1.0306	0.986461	0.869072	0.855251	0.784508	0.948664	0.817146	0.661549	0.75814	0.668706	0.926578	0.914246	0.86271	0.255606	0.677985	0.597612	0.501277	0.353186	0.39164	0.463605	1.10265	1.08026	0.263243	0.0426541	0.0859846				0.152413	0.568746	0.36489	0.482124	0.490161	0.217268	0.020498	0	0.0263286	0.254755	0.552637
83	0.896644	0.715875	0.826709	0.657975	0.50256	0.602416	0.706501	0.670957	0.712274	0.701152	0.6191	0.615709	0.510845	0.457187	0.389209	0.559131	0.394819	0.261656	0.365027	0.293577	0.508907	0.510406	0.44425	0.131529	0.258759	0.194159	0.0981325	0.039266	0.0335685	0.149443	0.923771	0.733274	0.04438	0.131932	0.0785699				0.275016	0.0770618	0.0974229	0.0450318	0.0377808	0.171198	0.130286	0.0263286	0	0.030263	0.0893007
84	0.803472	0.627697	0.733378	0.576805	0.409584	0.511336	0.619687	0.588161	0.63065	0.636847	0.554349	0.544527	0.409548	0.368884	0.341098	0.506271	0.332411	0.222512	0.304841	0.241189	0.480728	0.469937	0.343071	0.175796	0.238085	0.186918	0.0955289	0.0389351	0.0023227	0.331831	0.702031	0.516674	0.0153101	0.0965303	0.187819				0.353756	0.0638329	0.304388	0.155142	0.135137	0.297014	0.0096257	0.254755	0.030263	0	0.0094015
85	0.615184	0.454526	0.590521	0.419935	0.24471	0.370837	0.492257	0.429041	0.478492	0.516169	0.417976	0.37602	0.254555	0.250593	0.199022	0.366233	0.234952	0.121621	0.162002	0.119731	0.419871	0.389755	0.215885	0.234801	0.246234	0.17351	0.0649401	0.0140422	0.150668	0.521974	0.815371	0.761032	0.261383	0.143885	0.331721				0.46034	0.109649	0.311435	0.179882	0.158503	0.327101	0.227825	0.552637	0.0893007	0.0094015	0
86	0.758223	0.584763	0.726329	0.557033	0.373256	0.500709	0.633108	0.571688	0.601141	0.635228	0.567918	0.52486	0.431266	0.439192	0.355445	0.480011	0.349767	0.298614	0.339147	0.246162	0.536429	0.601603	0.414439	0.0993419	0.410863	0.409775	0.15819	0.103412	0.267775	0.512864	1.20803	1.05895	0.266841	0.172171	0.11056				0.404241	0.037514	0.249419	0.0626038	0.107586	0.339055	0.190381	0.517072	0.0568667	0.137887	0.00334488
87	0.925535	0.741384	0.83522	0.686964	0.510759	0.607916	0.718056	0.699537	0.725599	0.726164	0.673315	0.670814	0.549602	0.51362	0.473888	0.592776	0.40028	0.370361	0.436313	0.33312	0.548849	0.617335	0.423372	0.0879081	0.338281	0.341757	0.121452	0.00409995	0.0823861	0.386846	0.957559	0.698328	0.0103978	0.0714867	0.0201257				0.281849	0.0359949	0.197308	0.000240473	0.0390675	0.224261	0.0538348	0.279017	0.010632	0.0767597	0.25834
88	1.01365	0.846666	0.940077	0.796368	0.615974	0.721069	0.830436	0.809409	0.847504	0.868483	0.803023	0.792176	0.644502	0.621749	0.622156	0.747894	0.551836	0.530567	0.57426	0.489258	0.721604	0.764282	0.512509	0.0755054	0.497351	0.508568	0.292927	0.156957	0.254555	0.628542	0.833321	0.587568	0.104003	0.0012348	0.238058				0.274926	0.0507805	0.188362	0.0560021	0.0505916	0.180773	0.0158495	0.424307	0.0402349	0.116778	0.0910695
89	0.935895	0.795271	0.911337	0.743948	0.5687	0.706637	0.816566	0.769438	0.830411	0.877994	0.796713	0.771744	0.673814	0.680221	0.635779	0.770132	0.620839	0.621524	0.632459	0.575241	0.844161	0.918125	0.618579	0.255544	0.704881	0.751826	0.457113	0.368361	0.50318	0.805657	1.12138	0.931783	0.309136	0.236381	0.32536				0.401038	0.00993071	0.213963	0.0983441	0.1214	0.249208	0.102619	0.589536	0.000125914	0.0881267	0.102045
90	0.798623	0.60706	0.718406	0.579174	0.372986	0.48242	0.619644	0.590594	0.587857	0.61592	0.600589	0.569909	0.458963	0.474754	0.422234	0.462773	0.284358	0.375772	0.385409	0.227769	0.47024	0.638385	0.307685	0.106595	0.369902	0.435405	0.0679308	0.0181348	0.214877	0.46197	1.06412	0.861566	0.143653	0.0684626	0.0220206				0.353667	0.0337256	0.270606	0.0247877	0.0805606	0.332237	0.100666	0.420497	0.0732556	0.0891382	0.14959
91	0.724265	0.533986	0.622282	0.50005	0.284867	0.389374	0.519906	0.506923	0.501911	0.536887	0.530406	0.504627	0.377187	0.390957	0.373964	0.394156	0.20852	0.330228	0.316579	0.175006	0.41568	0.564164	0.206098	0.143971	0.318513	0.381566	0.0575409	0.00302179	0.189268	0.505291	0.942539	0.698163	0.138043	0.0445503	0.15059				0.399759	0.120437	0.399647	0.131722	0.131341	0.375364	0.114543	0.409384	0.0730984	0.0911603	0.133401
92	0.867432	0.700218	0.777322	0.654073	0.4537	0.557342	0.671708	0.665258	0.684902	0.719863	0.691211	0.676559	0.526671	0.532824	0.553653	0.601143	0.393352	0.508785	0.487896	0.374968	0.584508	0.698303	0.306451	0.0482037	0.445445	0.50352	0.208861	0.128439	0.291207	0.622226	0.865413	0.62078	0.155735	0.0907177	0.231147				0.377179	0.0633555	0.296258	0.105609	0.130363	0.307368	0.0878923	0.513013	0.057494	0.00785958	0.109754
93	0.900704	0.726017	0.802042	0.673924	0.477355	0.578053	0.691604	0.690495	0.700837	0.719613	0.709132	0.707458	0.586314	0.588999	0.573623	0.594801	0.379733	0.536393	0.519837	0.376106	0.544283	0.707311	0.304939	0.0692169	0.431969	0.498088	0.165795	0.105006	0.264224	0.525387	0.993334	0.760133	0.126416	0.098739	0.0756933				0.362187	0.0257404	0.230213	0.0259354	0.105171	0.296048	0.0606556	0.485933	0.0699974	0.00540923	0.186345
94	0.722883	0.546266	0.601172	0.481644	0.286027	0.388554	0.493215	0.507413	0.514849	0.534044	0.545896	0.559495	0.481663	0.480988	0.447218	0.440699	0.257604	0.452344	0.431233	0.305911	0.476462	0.66468	0.314601	0.0793198	0.449996	0.547832	0.234684	0.169629	0.339996	0.63638	1.206	0.920874	0.271054	0.245775	0.221047				0.585955	0.281986	0.514731	0.262968	0.329913	0.542417	0.259019	0.618377	0.308844	0.230451	0.0104484
95	0.698114	0.5187	0.549502	0.45279	0.250013	0.332795	0.43058	0.462255	0.464983	0.482538	0.492973	0.507524	0.378301	0.371954	0.396966	0.387576	0.176196	0.373599	0.337133	0.225127	0.387033	0.5395	0.167196	0.0255717	0.330284	0.427296	0.145712	0.0640024	0.2361	0.58859	0.947054	0.64211	0.164006	0.125726	0.226054				0.506133	0.234495	0.476701	0.224993	0.265774	0.468198	0.179976	0.556106	0.214255	0.15101	0.0628339
96	0.646332	0.455248	0.482922	0.399112	0.180641	0.24689	0.351041	0.384708	0.366564	0.381328	0.402023	0.403227	0.241418	0.248389	0.29558	0.249668	0.0220719	0.264967	0.189455	0.0744378	0.208692	0.363535	0.0516939	0.135246	0.178605	0.287357	0.00396849	0.0630478	0.13171	0.45927	0.74776	0.484634	0.0528706	0.0321624	0.081392				0.391445	0.114968	0.325789	0.0802006	0.155595	0.367008	0.0916976	0.498767	0.117184	0.0637513	0.150976
97	0.851525	0.674542	0.692887	0.59934	0.399229	0.479799	0.569953	0.61534	0.604933	0.611751	0.651152	0.680174	0.581317	0.577766	0.57794	0.503044	0.294691	0.566858	0.497837	0.365006	0.464874	0.646887	0.250428	0.155734	0.438823	0.528756	0.220962	0.165713	0.325124	0.595476	1.08662	0.807164	0.203879	0.196131	0.158911				0.499021	0.183518	0.397998	0.1644	0.248476	0.442759	0.172783	0.583161	0.223028	0.126376	0.0786186
98	0.705967	0.534054	0.560242	0.478052	0.261312	0.363601	0.469599	0.507775	0.490457	0.533791	0.59609	0.606106	0.534052	0.562128	0.562741	0.463287	0.296908	0.601121	0.525569	0.386408	0.539281	0.751395	0.356474	0.216952	0.565038	0.673534	0.343342	0.293266	0.485359	0.779149	1.26739	0.970422	0.399852	0.353854	0.38015				0.691776	0.410506	0.678348	0.400872	0.432068	0.655937	0.378348	0.714129	0.4036	0.350002	0.131096
99	0.727609	0.572509	0.590674	0.522298	0.301476	0.404192	0.506876	0.548945	0.53974	0.599783	0.654901	0.655531	0.551034	0.591399	0.639381	0.538136	0.365069	0.677164	0.575904	0.453133	0.609691	0.789495	0.368886	0.28143	0.619021	0.719544	0.40637	0.356486	0.551509	0.865283	1.17774	0.881281	0.442656	0.381419	0.502433				0.703186	0.42543	0.702375	0.444553	0.448084	0.656955	0.404622	0.768164	0.394919	0.355187	0.188745
109	0.710549	0.500594	0.54441	0.410359	0.237648	0.306708	0.395577	0.400157	0.313304	0.271812	0.378643	0.388072	0.539804	0.535312	0.284657	0.0365227	0.0140726	0.378761	0.258593	0.119065	0.109134	0.383649	0.115924	0.192055	0.309554	0.402348	0.0945492	0.124132	0.286115	0.330014	1.23966	1.12196	0.213821	0.284594	0.195735				0.488886	0.145941	0.270975	0.0226839	0.231518	0.457199	0.207139	0.527147	0.293345	0.193491	0.0718361
110	0.824399	0.591403	0.607218	0.50202	0.308879	0.357601	0.446614	0.463313	0.339667	0.306109	0.439589	0.435011	0.558946	0.560961	0.333086	0.0519734	0.012768	0.393034	0.263068	0.0911016	0.102947	0.38883	0.0884448	0.108331	0.272488	0.362078	0.0171956	0.0443999	0.21637	0.269737	1.20508	1.05873	0.132486	0.174919	0.271373				0.389066	0.0603957	0.22124	0.0532939	0.127787	0.371258	0.112802	0.398885	0.198052	0.112539	0.161795
111	0.371261	0.146084	0.193528	0.133541	0.101579	0.00715472	0.139802	0.177061	0.0512847	0.0936538	0.29714	0.302303	0.402252	0.482555	0.362847	0.0733118	0.0329287	0.515062	0.415113	0.240136	0.264507	0.606619	0.304553	0.345214	0.530072	0.689646	0.349034	0.345916	0.565212	0.693332	1.47881	1.31111	0.518894	0.557464	0.167567				0.832697	0.532961	0.702586	0.406721	0.584864	0.848893	0.568814	0.87647	0.654962	0.583906	0.28993
112	0.397222	0.150675	0.171809	0.101406	0.129877	0.0688361	0.0554523	0.0868826	0.0604129	0.0468187	0.149296	0.148403	0.273559	0.34144	0.191118	0.119313	0.138702	0.342209	0.220411	0.0754232	0.0475433	0.368824	0.0951403	0.221311	0.33135	0.485147	0.179271	0.182096	0.385674	0.489359	1.2359	1.10172	0.3315	0.396008	0.0393701				0.650591	0.34076	0.474052	0.202348	0.413293	0.662156	0.390665	0.73	0.484016	0.401186	0.1193
113	0.516428	0.17753	0.191431	0.151265	0.128271	0.133527	0.0173748	0.0279558	0.235843	0.231676	0.00901399	0.0598356	0.0452409	0.133389	0.0468855	0.445953	0.452515	0.0529897	0.0819581	0.298164	0.307473	0.0588432	0.230633	0.160604	0.0176642	0.141971	0.213206	0.202351	0.0301064	0.0948634	0.907848	0.801374	0.0197729	0.0226156	0.480431				0.269706	0.0107542	0.134383	0.172233	0.0475059	0.336353	0.0626813	0.339688	0.166286	0.118168	0.191161
114	0.557187	0.22743	0.286264	0.303993	0.0251296	0.01306	0.221675	0.246737	0.0359053	0.0320395	0.327332	0.243517	0.305169	0.445642	0.324133	0.113969	0.13473	0.427223	0.269389	0.0130585	0.0488937	0.435927	0.0791867	0.117169	0.328932	0.48867	0.0791653	0.0985647	0.364551	0.438518	1.19799	1.08192	0.293557	0.28498	0.140807				0.511036	0.24074	0.44741	0.113429	0.276196	0.597568	0.340228	0.589439	0.399367	0.393609	0.0993299
115	1.06211	0.791775	0.756982	0.7212	0.448345	0.463626	0.549682	0.562265	0.3525	0.367451	0.537011	0.457784	0.552942	0.618187	0.422401	0.0255153	0.0167143	0.481932	0.236627	0.0832463	0.0811647	0.332045	0.0417471	0.127331	0.258539	0.332056	0.0178097	0.0344169	0.222057	0.276337	0.987172	0.863754	0.0830194	0.0978106	0.247042				0.26283	0.0757621	0.115083	0.148653	0.00497342	0.244029	0.0164675	0.353544	0.0449488	0.0137421	0.234571
116	0.748376	0.535918	0.468461	0.397342	0.217257	0.239887	0.277146	0.293919	0.150542	0.147762	0.307846	0.285137	0.481769	0.51901	0.300639	0.0316352	0.00695853	0.428864	0.232773	0.135715	0.0769405	0.32919	0.0486116	0.259345	0.315248	0.410386	0.11837	0.1588	0.322143	0.378138	1.13935	1.02043	0.21891	0.283846	0.141139				0.47635	0.132853	0.273993	0.0249565	0.216357	0.441978	0.194752	0.547801	0.261856	0.165155	0.0761777
117	0.295923	0.10375	0.0945903	0.112256	0.0612448	0.00600272	0.112795	0.196012	0.0459302	0.0852753	0.351221	0.380406	0.551647	0.629665	0.509279	0.188264	0.186838	0.686368	0.566163	0.430866	0.37963	0.711513	0.458166	0.594533	0.689817	0.850005	0.540796	0.546333	0.749082	0.853468	1.62917	1.47761	0.694916	0.755328	0.314164				1.01667	0.713602	0.866238	0.573982	0.771384	1.02667	0.74514	1.06217	0.83955	0.753513	0.465355
127	0.571671	0.38295	0.435307	0.367054	0.0966794	0.192276	0.332647	0.348687	0.269463	0.33616	0.4489	0.394711	0.301334	0.415241	0.423758	0.163096	0.0354605	0.498518	0.291071	0.151898	0.228106	0.453478	0.00846275	0.160202	0.371397	0.484363	0.161965	0.169711	0.39355	0.568354	0.96185	0.808774	0.278729	0.278149	0.128329				0.514284	0.197373	0.38519	0.143334	0.258651	0.493033	0.265552	0.665076	0.260483	0.220473	0.0258504
128	0.667396	0.483307	0.56174	0.479611	0.202601	0.290502	0.443254	0.433663	0.346809	0.410166	0.496618	0.39256	0.24037	0.372427	0.38357	0.103109	0.0356755	0.415163	0.132944	0.0357084	0.0883633	0.252339	0.194243	0.0632447	0.215966	0.302131	0.0198181	0.0440405	0.254236	0.393404	0.703935	0.604861	0.124542	0.140628	0.0263882				0.338739	0.0102234	0.162735	0.0451768	0.0912096	0.307047	0.104189	0.531209	0.0886426	0.0460765	0.119775
129	0.55504	0.389193	0.45412	0.365704	0.12359	0.206808	0.335042	0.329985	0.303357	0.362615	0.387986	0.320297	0.139031	0.233067	0.308871	0.169767	0.0175357	0.356421	0.134386	0.0655759	0.147635	0.279507	0.167667	0.0479294	0.233672	0.335374	0.0791618	0.0727829	0.288567	0.491683	0.663002	0.53586	0.170402	0.179353	0.106127				0.412945	0.0996376	0.253223	0.0557771	0.176264	0.380306	0.175751	0.620527	0.15453	0.115963	0.0337089
130	0.564162	0.405763	0.464127	0.364115	0.144465	0.249627	0.367602	0.379067	0.375918	0.430766	0.468462	0.451341	0.333904	0.407328	0.447956	0.340342	0.162275	0.523912	0.386189	0.270682	0.381934	0.575383	0.122496	0.210645	0.458411	0.571919	0.272022	0.251357	0.461346	0.688897	1.00344	0.825622	0.346527	0.347598	0.270699				0.600647	0.279427	0.460028	0.245185	0.350021	0.558246	0.334471	0.766007	0.326723	0.273812	0.102351
131	0.837015	0.647454	0.721179	0.610423	0.387497	0.473084	0.6026	0.61282	0.569863	0.580591	0.632087	0.619756	0.492411	0.539216	0.509091	0.354619	0.141645	0.486172	0.335649	0.164581	0.234837	0.426664	0.0434051	0.0504851	0.264119	0.337293	0.0182873	0.0235514	0.210835	0.360035	0.855796	0.716391	0.0811867	0.101957	0.0990817				0.317048	0.0233177	0.131588	0.0810411	0.0635901	0.274202	0.0514739	0.472955	0.0671657	0.000973337	0.195385
132	0.644394	0.493923	0.590003	0.447614	0.25872	0.367074	0.486827	0.466586	0.493911	0.524623	0.509653	0.495749	0.376169	0.444443	0.439825	0.410548	0.187468	0.509092	0.381229	0.259275	0.319752	0.475768	0.0126647	0.210457	0.368513	0.445655	0.188195	0.186973	0.364508	0.509321	0.881183	0.789813	0.237688	0.286147	0.0771258				0.476656	0.126809	0.239017	0.0690848	0.234541	0.416705	0.220317	0.680582	0.224175	0.14954	0.00658496
133	0.598456	0.429426	0.498714	0.378172	0.197357	0.268426	0.375297	0.380123	0.406173	0.408361	0.368995	0.372838	0.186073	0.193396	0.24262	0.314608	0.04897	0.235398	0.185542	0.1206	0.211009	0.343488	0.0829917	0.000240187	0.213556	0.346824	0.119178	0.0513624	0.248411	0.508443	0.718444	0.577188	0.160447	0.204083	0.0877911				0.470588	0.157092	0.268242	0.0960782	0.261216	0.444919	0.227324	0.706129	0.257668	0.193553	0.0290358
134	0.655326	0.47722	0.531736	0.407966	0.229152	0.303804	0.400989	0.418614	0.438039	0.425937	0.407731	0.434304	0.301446	0.287932	0.28286	0.327514	0.0824178	0.267502	0.248166	0.1507	0.250169	0.419936	0.031419	0.0246197	0.23785	0.362717	0.0977491	0.0267773	0.204375	0.480955	0.904871	0.69793	0.13115	0.172547	0.0395651				0.478884	0.159608	0.295289	0.0938539	0.253317	0.444298	0.185737	0.646146	0.250906	0.157862	0.0655793
135	1.05637	0.889865	0.996637	0.839288	0.658914	0.769204	0.88621	0.863234	0.881436	0.883073	0.86112	0.864331	0.778403	0.781164	0.697058	0.729845	0.486565	0.644723	0.640371	0.434513	0.516815	0.675421	0.206352	0.095937	0.35549	0.346534	0.00457373	0.0119977	0.147967	0.235124	0.892337	0.774547	0.0240111	0.00144264	0.237567				0.158614	0.220528	0.0850213	0.26383	0.113444	0.0696213	0.127346	0.301564	0.125491	0.206133	0.386813
136	0.631938	0.478386	0.598842	0.430877	0.263369	0.378014	0.494232	0.446057	0.497799	0.518903	0.442405	0.419878	0.321127	0.345144	0.266654	0.413439	0.222121	0.300426	0.30021	0.230598	0.411228	0.595636	0.129977	0.0851916	0.38043	0.465821	0.176582	0.149126	0.330093	0.485479	0.936124	0.867612	0.222612	0.274119	0.0416793				0.460938	0.101766	0.193729	0.0418932	0.218388	0.389558	0.208664	0.671791	0.205621	0.134729	0.0176122
137	0.822932	0.62045	0.720523	0.590631	0.398761	0.469189	0.601	0.587088	0.581276	0.570396	0.541033	0.525251	0.343186	0.33451	0.32463	0.405794	0.140729	0.199416	0.234268	0.0604815	0.225519	0.37843	0.0399986	0.347168	0.0450917	0.116541	0.217676	0.276434	0.0695025	0.178193	0.62548	0.493109	0.13003	0.119786	0.268123				0.180794	0.126137	0.00173128	0.208237	0.0347945	0.185118	0.0504988	0.379755	0.000598206	0.0269878	0.274226
138	0.780987	0.607154	0.709563	0.544854	0.379124	0.485491	0.592614	0.565158	0.597431	0.591043	0.544716	0.548383	0.488346	0.468116	0.358197	0.459994	0.278311	0.325784	0.364107	0.257978	0.423521	0.578912	0.326501	0.0223109	0.338671	0.398805	0.0892746	0.0426062	0.185055	0.363262	1.17245	0.97818	0.115906	0.150638	0.100975				0.400677	0.0373086	0.168214	0.0272093	0.140363	0.328243	0.0905137	0.498568	0.147413	0.0445238	0.203061
139	0.978894	0.80461	0.920268	0.739707	0.595511	0.690329	0.791126	0.752857	0.792456	0.754942	0.683887	0.69315	0.638638	0.591159	0.441076	0.594873	0.385491	0.343371	0.418143	0.306785	0.387518	0.490801	0.301908	0.104059	0.18221	0.153154	0.17376	0.15897	0.0397197	0.0144804	0.928062	0.833804	0.13271	0.065871	0.470048				0.118064	0.25472	0.186132	0.36125	0.130913	0.0487226	0.155662	0.233479	0.0886434	0.171797	0.398731
140	0.594947	0.42137	0.536155	0.363985	0.22735	0.309852	0.412062	0.374003	0.426892	0.393588	0.294888	0.298256	0.185547	0.140595	0.0478226	0.271451	0.0647721	0.0658664	0.0323394	0.00158726	0.155414	0.201185	0.0937796	0.335843	0.0369609	0.12892	0.0239761	0.124947	0.0511935	0.259768	0.960601	0.879457	0.0953209	0.217185	0.169649				0.465981	0.122794	0.140113	0.00264467	0.272942	0.426194	0.22584	0.699594	0.319375	0.2187	0.0251502
141	0.733229	0.524639	0.626248	0.479081	0.324783	0.381516	0.496652	0.482488	0.495493	0.444595	0.387732	0.397511	0.244396	0.186882	0.13729	0.302172	0.0548278	0.0371076	0.094045	0.0417127	0.0968756	0.186416	0.0679118	0.56201	0.147809	0.125184	0.417374	0.486377	0.30189	0.0821075	0.773862	0.619946	0.207074	0.133472	0.465217				0.266312	0.0251984	0.0180603	0.189686	0.104063	0.320071	0.0464047	0.467664	0.255895	0.186055	0.141289
148	1.1896	0.82946	0.829787	0.753703	0.621099	0.444186	0.545855	0.641404	0.43514	0.112356	0.219337	0.26483	0.0108627	0.108379	0.276861	0.637225	0.955895	0.595998	0.597192	1.10979	1.11537	0.657431	0.8809	1.0017	0.861221	0.625554	0.968722	1.03225	0.755073	0.715699	0.0754664	0.058797	0.739827	0.642877	1.35874				0.354241	0.576523	0.559671	0.831653	0.450004	0.158558	0.439885	0.146357	0.192376	0.235303	0.581743
149	0.144863	0.275604	0.0121156	0.0235086	0.369361	0.3256	0.108429	0.11684	0.272417	0.153724	0.280621	0.149063	0.00556912	0.349222	0.411045	0.0805719	0.170912	0.598301	0.733902	0.145886	0.281467	0.991877	0.726672	0.450873	0.794079	1.15608	0.646486	0.568203	0.998065	1.06347	1.74742	1.74389	1.01423	0.978092	0.323043				1.17839	0.997045	1.17411	0.813197	1.06474	1.49319	1.27574	1.45772	1.39289	1.48771	1.16785
150	0.765262	0.557387	0.867591	0.75823	0.412294	0.653832	0.99837	0.892157	0.732898	0.9577	1.19885	1.05524	1.0565	1.37629	1.31546	0.935452	0.864818	1.46899	1.38585	0.87562	1.05161	1.46206	0.90259	0.859094	1.19587	1.24469	0.693001	0.807875	1.10305	0.994568	1.66921	1.73649	0.894799	0.798641	0.399334				0.753293	0.401087	0.649019	0.391757	0.467565	0.799178	0.718606	0.963586	0.583733	0.681078	0.563243
151	0.809394	0.657803	0.852288	0.670249	0.466497	0.639956	0.814887	0.739761	0.72676	0.765885	0.817743	0.812964	0.907188	0.976165	0.705951	0.484501	0.396797	0.756513	0.518313	0.340979	0.350061	0.542282	0.15057	0.402816	0.48734	0.495593	0.180446	0.282646	0.452188	0.390388	1.08244	1.11808	0.308068	0.351356	0.0928037				0.409172	0.0321856	0.14765	0.0418015	0.139303	0.358603	0.208044	0.564905	0.181238	0.1398	0.0199307
152	0.542095	0.282137	0.442688	0.346499	0.100315	0.178254	0.403408	0.398393	0.21377	0.221664	0.432716	0.40643	0.467735	0.589051	0.410112	0.0473275	0.0290778	0.536407	0.431714	0.205929	0.173904	0.525819	0.254022	0.39721	0.480282	0.62108	0.301412	0.326204	0.548177	0.556516	1.25885	1.24665	0.472761	0.528671	0.00375267				0.672507	0.355583	0.464538	0.226145	0.457413	0.719569	0.516892	0.844609	0.573322	0.534981	0.303761
153	0.351484	0.0945354	0.233765	0.159795	0.136999	0.0298326	0.203336	0.198528	0.0155533	0.0919563	0.326716	0.272023	0.295038	0.474394	0.38908	0.0138487	0.0186511	0.553658	0.439207	0.203594	0.226079	0.599576	0.265977	0.384419	0.539606	0.708249	0.360397	0.371311	0.622828	0.696952	1.32668	1.26162	0.553931	0.586508	0.154247				0.77994	0.474339	0.618218	0.35587	0.553606	0.829704	0.607405	0.94219	0.651818	0.624492	0.380795
154	0.727167	0.475925	0.610842	0.531777	0.221943	0.292151	0.51632	0.505187	0.294745	0.330492	0.513414	0.385851	0.249286	0.435455	0.326979	0.151731	0.196877	0.357865	0.0822293	0.118874	0.0747805	0.205536	0.212227	0.02566	0.1646	0.275508	0.0558173	0.0109657	0.22899	0.278263	0.771155	0.747383	0.120323	0.143517	0.216505				0.301486	0.0184197	0.117516	0.115194	0.0682366	0.325386	0.130426	0.497836	0.13676	0.120407	0.0815774
155	0.569323	0.354564	0.446413	0.328052	0.107904	0.156729	0.305382	0.318936	0.177	0.12948	0.256832	0.227841	0.269036	0.372873	0.177378	0.16171	0.157029	0.325066	0.128589	0.0484631	0.0405476	0.205239	0.049852	0.257377	0.252636	0.374056	0.137786	0.163127	0.346188	0.394894	0.927492	0.898971	0.257885	0.342252	0.0966264				0.507031	0.173476	0.255191	0.0546534	0.286897	0.503705	0.294914	0.696407	0.346916	0.275331	0.0705388
156	0.147698	0.110332	0.075288	0.14901	0.410472	0.350494	0.197269	0.170883	0.313747	0.278303	0.0455295	0.0211928	0.0874558	0.21492	0.157889	0.134275	0.167169	0.368769	0.27051	0.164383	0.0588276	0.376931	0.157983	0.394931	0.410655	0.599115	0.352673	0.335072	0.543274	0.656573	1.19851	1.10879	0.490767	0.578808	0.136161				0.815663	0.51124	0.602667	0.367219	0.61016	0.846825	0.596456	0.98963	0.687243	0.60973	0.360368
157	0.266683	0.0349775	0.0507565	0.00628783	0.278663	0.226309	0.0998275	0.0671897	0.177763	0.142502	0.0347874	0.0211594	0.035588	0.175618	0.16651	0.132017	0.194815	0.342265	0.181449	0.0831673	0.0239124	0.301384	0.0118452	0.266043	0.325657	0.496905	0.237027	0.227302	0.446162	0.585475	1.01439	0.908548	0.371949	0.432597	0.0997567				0.671296	0.36699	0.48564	0.250473	0.454706	0.691986	0.450334	0.857423	0.50772	0.447146	0.220071
158	0.356525	0.141808	0.169219	0.10537	0.152176	0.138429	0.0226479	0.00644739	0.0992938	0.101843	0.0352589	0.00614981	0.00158384	0.157281	0.159315	0.113264	0.178154	0.330697	0.143049	0.0963438	0.0130798	0.210849	0.0369111	0.30188	0.286956	0.439973	0.228081	0.226925	0.424213	0.535358	0.873079	0.809969	0.335036	0.411312	0.0689773				0.610464	0.296433	0.385699	0.185946	0.404337	0.620602	0.404182	0.835615	0.451939	0.387505	0.195091
159	0.292247	0.0385805	0.00337748	0.0576545	0.309107	0.319013	0.245823	0.211195	0.292315	0.297131	0.0995322	0.0576547	0.0236839	0.146778	0.128387	0.133637	0.177032	0.314624	0.167421	0.12463	0.0267437	0.216942	0.0174694	0.351103	0.299494	0.465874	0.264117	0.255736	0.442557	0.550106	0.948548	0.875825	0.364475	0.458278	0.0610441				0.669187	0.358085	0.435761	0.229223	0.469807	0.686751	0.454243	0.881638	0.529303	0.449737	0.236856
160	0.294709	0.0549217	0.0281586	0.0518468	0.308587	0.306244	0.260474	0.204041	0.28592	0.2705	0.101854	0.0883259	0.0392525	0.072426	0.069755	0.207962	0.260645	0.238363	0.0642961	0.0102207	0.0953113	0.142971	0.109574	0.195685	0.199743	0.362912	0.134406	0.125958	0.32526	0.465929	0.848059	0.733975	0.241698	0.313458	0.00928586				0.552487	0.247624	0.356978	0.130081	0.340856	0.566675	0.320695	0.745	0.38633	0.3131	0.0926878
161	0.396842	0.22593	0.157068	0.146602	0.081164	0.0897955	0.0673389	0.0135167	0.0330658	0.0296781	0.0697195	0.0757183	0.0472595	0.150998	0.199288	0.0356085	0.117701	0.338248	0.132232	0.117354	0.0144087	0.184643	0.0778392	0.271218	0.260314	0.399097	0.199801	0.195756	0.379627	0.530103	0.787862	0.674609	0.27393	0.341125	0.0971044				0.56091	0.246617	0.354531	0.156145	0.347148	0.550948	0.325394	0.77902	0.366385	0.292094	0.112217
162	0.358319	0.29005	0.216786	0.228232	0.0811587	0.0759371	0.0672147	0.189138	0.175716	0.182025	0.278656	0.287996	0.308362	0.420552	0.443303	0.226754	0.185251	0.596422	0.376538	0.403445	0.263016	0.391633	0.173727	0.590076	0.512295	0.626489	0.464925	0.480374	0.634329	0.746788	0.991587	0.910951	0.515812	0.602643	0.329501				0.780577	0.445276	0.53011	0.361811	0.56228	0.743553	0.538076	1.00687	0.56942	0.480152	0.327334
163	0.355825	0.232515	0.141175	0.169994	0.0592038	0.0413859	0.0280403	0.0226267	0.0369845	0.0186176	0.15873	0.128	0.204822	0.337509	0.312838	0.0334765	0.0283004	0.482129	0.246591	0.235786	0.127392	0.296619	0.0422764	0.428909	0.394975	0.510877	0.305317	0.33364	0.508393	0.610762	0.926575	0.841503	0.391218	0.459215	0.175762				0.640601	0.309292	0.421388	0.22323	0.410289	0.615211	0.401989	0.842661	0.426866	0.351407	0.179151
164	0.3176	0.224713	0.135572	0.169538	0.0638374	0.0337696	0.0148759	0.0361953	0.0134988	0.0622112	0.182693	0.13876	0.159528	0.294658	0.317585	0.0408681	0.0108797	0.471012	0.220401	0.203125	0.131091	0.28615	0.00867967	0.358803	0.367623	0.480437	0.262913	0.287175	0.473015	0.607422	0.851962	0.737314	0.347925	0.393673	0.197936				0.591359	0.267664	0.404892	0.199766	0.355661	0.562436	0.348621	0.792716	0.356335	0.2911	0.129374
174	0.317031	0.110449	0.0523344	0.104373	0.118988	0.0884033	0.00447339	0.0690847	0.0912215	0.0272662	0.218498	0.197974	0.33663	0.463651	0.382662	0.0430865	0.0594214	0.559506	0.362024	0.286591	0.186853	0.441359	0.185743	0.493635	0.496063	0.6339	0.37707	0.403523	0.597374	0.680004	1.18509	1.09643	0.500805	0.566046	0.182365				0.760963	0.4389	0.565073	0.32649	0.527405	0.763163	0.528628	0.919565	0.577978	0.506801	0.287307
175	0.521187	0.286544	0.226588	0.207509	0.0115565	0.0261573	0.0930259	0.112518	0.0605343	0.0229217	0.19218	0.160829	0.363969	0.457214	0.290842	0.0492839	0.00500621	0.463436	0.268909	0.193059	0.0913264	0.347557	0.105904	0.398011	0.393348	0.514129	0.25437	0.292136	0.469005	0.519583	1.14318	1.06727	0.37394	0.450506	0.0056831				0.630059	0.296256	0.412797	0.176589	0.390274	0.62063	0.38595	0.760665	0.446708	0.363188	0.134421
176	0.429393	0.25194	0.191544	0.121299	0.0128999	0.0234563	0.0581098	0.0655393	0.0605083	0.0427889	0.147839	0.140658	0.399602	0.478078	0.288791	0.00109158	0.0662519	0.488911	0.306711	0.278086	0.134665	0.36177	0.175059	0.524357	0.453656	0.567652	0.354798	0.397492	0.550253	0.580185	1.1804	1.13665	0.460329	0.564326	0.0818529				0.724099	0.378441	0.4598	0.252593	0.489703	0.698283	0.474998	0.868647	0.538838	0.44028	0.226153
177	0.331162	0.193514	0.159936	0.0908486	0.0240469	0.0239957	0.0687271	0.132188	0.0512467	0.0538085	0.236255	0.264666	0.477301	0.557997	0.415426	0.152522	0.189535	0.614099	0.429872	0.421353	0.267912	0.473088	0.285271	0.659342	0.577688	0.694722	0.500604	0.533874	0.684749	0.737128	1.24883	1.19806	0.590098	0.695232	0.259489				0.85982	0.51338	0.59043	0.397297	0.629073	0.827441	0.609157	1.02882	0.665229	0.565179	0.367461
178	0.329079	0.130433	0.16692	0.125697	0.0898823	0.000630295	0.132161	0.198553	0.0469773	0.0861839	0.326578	0.343028	0.505341	0.606369	0.480863	0.163653	0.179033	0.66313	0.492619	0.418611	0.308786	0.569429	0.336406	0.632236	0.621551	0.754601	0.508912	0.534384	0.714697	0.777999	1.35208	1.28327	0.626791	0.709126	0.273187				0.890074	0.55617	0.660879	0.438235	0.656782	0.880773	0.653346	1.04404	0.710135	0.627111	0.408264
179	0.435485	0.197014	0.220102	0.125451	0.0549161	0.0261744	0.0754207	0.0754237	0.108745	0.102925	0.10668	0.0901069	0.335815	0.406359	0.194665	0.115476	0.0612377	0.383947	0.234296	0.162429	0.0365504	0.308319	0.118443	0.401927	0.365093	0.494934	0.259377	0.289396	0.456871	0.48623	1.16034	1.11626	0.384316	0.485844	0.0375077				0.66	0.326506	0.40665	0.185523	0.434617	0.656505	0.425236	0.795297	0.505944	0.413784	0.177242
180	0.40166	0.164893	0.282888	0.19244	0.0206395	0.0371227	0.20287	0.204598	0.0377959	0.0295003	0.211118	0.178622	0.426059	0.525635	0.314409	0.00828189	0.0732755	0.510671	0.357221	0.296323	0.142638	0.402175	0.237795	0.570373	0.490129	0.616379	0.402364	0.440281	0.60775	0.606996	1.1981	1.20694	0.528884	0.632589	0.0883157				0.765457	0.432415	0.496232	0.295633	0.552724	0.772995	0.569415	0.944468	0.632453	0.555097	0.345359
181	0.244564	0.0746029	0.198284	0.0620679	0.143285	0.0108018	0.154284	0.163259	0.0565509	0.0755794	0.274719	0.309453	0.522743	0.612292	0.42358	0.148767	0.185904	0.631613	0.464432	0.427078	0.285652	0.51887	0.328344	0.675681	0.609665	0.727227	0.520851	0.555722	0.717137	0.743951	1.29591	1.28119	0.630922	0.733053	0.25405				0.877051	0.532182	0.602339	0.412131	0.650884	0.85648	0.653634	1.05478	0.702277	0.616096	0.420391
182	0.414115	0.141165	0.217568	0.115074	0.0935285	0.0827873	0.0752009	0.0811783	0.136711	0.165371	0.0463236	0.0206787	0.203463	0.287524	0.0873695	0.231855	0.203452	0.272617	0.171478	0.0595144	0.0614806	0.253352	0.074914	0.312017	0.29029	0.448076	0.208325	0.215573	0.401764	0.440081	1.10788	1.07421	0.348532	0.452	0.0997045				0.639101	0.322061	0.388954	0.166513	0.435253	0.666201	0.433961	0.799257	0.531129	0.44898	0.201939
183	0.349039	0.0849491	0.171862	0.0450353	0.0829852	0.121571	0.0193772	0.0100525	0.210911	0.28719	0.0744832	0.0893924	0.162702	0.218859	0.0148033	0.271068	0.221968	0.187785	0.136094	0.0591485	0.118657	0.189932	0.101577	0.359765	0.262745	0.421904	0.230216	0.235053	0.395133	0.400549	1.10567	1.10955	0.359822	0.495992	0.144807				0.666717	0.348623	0.37431	0.172481	0.478619	0.692253	0.465539	0.825592	0.583908	0.485418	0.239357
184	0.0410609	0.182032	0.0670478	0.215259	0.312046	0.334863	0.168125	0.176844	0.341032	0.404138	0.182026	0.110095	0.24197	0.278293	0.0875443	0.00124032	0.0220335	0.378399	0.37086	0.393338	0.137171	0.394945	0.374213	0.716863	0.533714	0.692179	0.57119	0.56585	0.695382	0.714469	1.31137	1.32736	0.660017	0.821998	0.20523				0.981755	0.65111	0.648742	0.484825	0.797279	0.978772	0.765969	1.16986	0.874001	0.75782	0.544094
185	0.183341	0.0896697	0.00460239	0.11706	0.264322	0.313881	0.147099	0.12482	0.304027	0.427566	0.237893	0.241207	0.0997667	0.0199185	0.121684	0.312357	0.327907	0.150839	0.204858	0.130613	0.0889505	0.260106	0.2127	0.450377	0.338727	0.549253	0.38576	0.34017	0.513298	0.575911	1.18662	1.16862	0.497416	0.644598	0.0291914				0.850085	0.546369	0.557069	0.365284	0.686763	0.894741	0.660856	1.05604	0.798368	0.695833	0.451538
186	0.24396	0.0423844	0.171889	0.0130728	0.12428	0.0728775	0.044992	0.0126413	0.0840369	0.165281	0.0815269	0.111095	0.18198	0.213352	0.104117	0.273845	0.179799	0.146155	0.127173	0.0939865	0.0523998	0.232414	0.182535	0.424496	0.325693	0.459809	0.299031	0.31472	0.44735	0.433659	1.24117	1.2568	0.431575	0.588067	0.0756467				0.749411	0.40885	0.416059	0.235013	0.54357	0.730169	0.512998	0.870355	0.623727	0.505569	0.267737
187	0.385533	0.204651	0.365941	0.164082	0.106937	0.135721	0.236803	0.154038	0.105145	0.038466	0.0111007	0.0378118	0.258645	0.276855	0.066916	0.210188	0.113759	0.140054	0.110488	0.091224	0.102464	0.149707	0.13734	0.43981	0.271342	0.38301	0.250811	0.285806	0.40449	0.333206	1.06224	1.15674	0.373158	0.53208	0.174529				0.631886	0.293973	0.279733	0.123815	0.443432	0.626011	0.444062	0.792701	0.538177	0.4388	0.234439
188	0.166341	0.0873311	0.0552234	0.0501541	0.112467	0.182838	0.00314738	0.0333554	0.0484845	0.266446	0.105479	0.021409	0.0159352	0.115911	0.017079	0.110505	0.0215674	0.275947	0.451604	0.473186	0.112876	0.426501	0.530284	0.805501	0.552676	0.749717	0.671221	0.617754	0.748248	0.746904	1.31954	1.39189	0.73737	0.914734	0.194688				1.04906	0.746394	0.705924	0.561767	0.917412	1.09963	0.909095	1.29686	1.04225	0.939455	0.738605
189	0.0652626	0.183006	0.0462573	0.180743	0.280278	0.298429	0.134268	0.142415	0.224331	0.366277	0.265817	0.255751	0.223134	0.117003	0.285249	0.319252	0.362161	0.0212559	0.185108	0.165796	0.0760028	0.296013	0.424541	0.60483	0.420082	0.638356	0.55749	0.491447	0.628942	0.649029	1.38472	1.42037	0.663707	0.855586	0.109184				1.03363	0.724793	0.682287	0.523971	0.887564	1.06438	0.850452	1.22467	1.00414	0.879779	0.645903
190	0.238198	0.0154777	0.184617	0.0235874	0.0445801	0.0355076	0.108016	0.0629877	0.00839318	0.125054	0.0617492	0.0643866	0.0618765	0.103692	0.138772	0.144088	0.139404	0.0287596	0.165056	0.130922	0.0652921	0.23923	0.369404	0.541303	0.352479	0.508333	0.431898	0.416606	0.525509	0.454943	1.29573	1.40271	0.559837	0.755253	0.0718488				0.875202	0.557871	0.499715	0.353784	0.721756	0.890122	0.703467	1.02245	0.840953	0.724667	0.503438
193	0.327797	0.166704	0.387232	0.197653	0.192078	0.22936	0.335244	0.233029	0.177422	0.0673361	0.150913	0.109446	0.450217	0.489298	0.157746	0.0445812	0.180499	0.369774	0.332042	0.333312	0.126543	0.350043	0.367372	0.696945	0.493224	0.585443	0.46745	0.526521	0.629962	0.507935	1.23114	1.37895	0.59436	0.754737	0.00339909				0.802725	0.465048	0.442215	0.297415	0.618178	0.800833	0.64288	0.963084	0.720172	0.630576	0.442642
194	0.37225	0.161083	0.345664	0.22892	0.246268	0.209742	0.332797	0.304055	0.194223	0.0551952	0.223985	0.23895	0.522385	0.542291	0.27732	0.152845	0.233356	0.453974	0.472819	0.430709	0.206448	0.483031	0.526916	0.772253	0.582823	0.713667	0.581437	0.606482	0.721114	0.616638	1.41359	1.5323	0.707748	0.87517	0.050599				0.954785	0.641474	0.612844	0.447293	0.794715	0.990849	0.808546	1.10345	0.929472	0.832393	0.609109
195	0.232329	0.00756707	0.1589	0.0377929	0.00883545	0.0229827	0.124949	0.102893	0.0316773	0.137758	0.0459125	0.0594403	0.327945	0.357536	0.0957751	0.0436013	0.0249279	0.288012	0.330652	0.264864	0.0772333	0.390586	0.427886	0.610384	0.471425	0.620822	0.473327	0.483591	0.609101	0.536957	1.42954	1.50102	0.621739	0.794241	0.025466				0.927599	0.615082	0.591506	0.406532	0.756105	0.952481	0.742099	1.02999	0.8834	0.770939	0.516894
196	0.348742	0.131494	0.286342	0.133833	0.0622288	0.0737447	0.203892	0.158307	0.0248381	0.0662424	0.0944566	0.0773717	0.382289	0.411144	0.113019	0.0868572	0.000468063	0.310712	0.276383	0.211297	0.0401768	0.330454	0.287326	0.527815	0.410338	0.537845	0.359869	0.390042	0.526498	0.465391	1.27749	1.33534	0.498635	0.6447	0.0806777				0.764331	0.435865	0.445404	0.257659	0.571732	0.776397	0.574429	0.894381	0.682363	0.583916	0.349748
197	0.582751	0.425089	0.585974	0.414996	0.378876	0.410503	0.491598	0.406786	0.277526	0.210907	0.349739	0.288058	0.633125	0.671181	0.326103	0.0643476	0.192446	0.50289	0.38384	0.311249	0.168499	0.426687	0.32224	0.597817	0.500169	0.586776	0.373786	0.444178	0.581587	0.479164	1.2843	1.36723	0.515401	0.632827	0.067935				0.696767	0.355002	0.395882	0.20461	0.484752	0.70222	0.525051	0.828481	0.593428	0.516634	0.305313
198	0.604707	0.356072	0.518215	0.455626	0.407974	0.379102	0.53529	0.540927	0.361154	0.273678	0.511398	0.517329	0.776827	0.812705	0.557361	0.315189	0.371482	0.708158	0.680957	0.552236	0.391756	0.72325	0.660322	0.819052	0.744951	0.88365	0.651042	0.676038	0.836194	0.753048	1.6309	1.69038	0.800628	0.917859	0.13721				1.01335	0.710175	0.749124	0.529716	0.838432	1.0809	0.88143	1.14425	0.998033	0.924508	0.673738
199	0.570101	0.27712	0.428534	0.376051	0.254175	0.235581	0.428086	0.449001	0.230671	0.164201	0.427964	0.431228	0.636156	0.687794	0.460822	0.181564	0.203841	0.598525	0.579274	0.402535	0.275119	0.644721	0.543074	0.642777	0.628207	0.787242	0.517651	0.526794	0.713867	0.664523	1.55537	1.57614	0.682886	0.783236	0.0382098				0.915581	0.623167	0.683727	0.440517	0.739665	0.999783	0.782515	1.04238	0.908473	0.842377	0.571684
200	0.688359	0.455703	0.496755	0.351829	0.230223	0.213099	0.284761	0.231809	0.0293124	0.0273626	0.13663	0.0665529	0.335476	0.373254	0.0583459	0.275816	0.191071	0.193301	0.0571046	0.0675191	0.16667	0.126681	0.0462461	0.157587	0.140801	0.245968	0.018297	0.032633	0.193771	0.147586	1.00394	1.0068	0.127937	0.227352	0.415505				0.360269	0.0300094	0.102331	0.126938	0.139565	0.373982	0.15592	0.457671	0.248735	0.16757	0.0828891
201	0.592698	0.420618	0.461456	0.299247	0.217818	0.227117	0.26793	0.193609	0.0276912	0.00890085	0.141759	0.0774059	0.399715	0.434503	0.0979609	0.209198	0.0949261	0.254327	0.113276	0.0175754	0.0868895	0.185413	0.032167	0.253735	0.218297	0.30506	0.053926	0.120965	0.262024	0.192719	1.10079	1.11427	0.195341	0.303464	0.362428				0.417733	0.0749348	0.1434	0.0788695	0.184447	0.407359	0.195234	0.485094	0.281855	0.190255	0.0541812
201	0.658745	0.436437	0.498491	0.377647	0.276469	0.2718	0.355059	0.31572	0.129992	0.076017	0.258383	0.213275	0.483417	0.512169	0.201907	0.104319	0.0290315	0.324915	0.226235	0.0797843	0.00941563	0.303947	0.156224	0.281253	0.28744	0.391782	0.111238	0.160287	0.317387	0.246372	1.23135	1.23525	0.265153	0.361624	0.348188				0.486925	0.168164	0.245091	0.000568898	0.27035	0.513606	0.293268	0.538333	0.402067	0.321587	0.0538611
201	0.564547	0.35919	0.43266	0.314632	0.194839	0.242868	0.340095	0.320869	0.179523	0.150483	0.326797	0.311969	0.587428	0.609581	0.314404	0.0360461	0.100998	0.464726	0.371461	0.240973	0.175414	0.484594	0.319322	0.427896	0.466017	0.571478	0.289427	0.332886	0.487619	0.454493	1.46095	1.41785	0.441706	0.53758	0.112824				0.697474	0.367573	0.459213	0.209543	0.459733	0.693231	0.457435	0.717208	0.562209	0.466051	0.192315
201	0.715335	0.53129	0.589333	0.46945	0.341102	0.407067	0.491542	0.480947	0.358482	0.33711	0.497724	0.486856	0.754584	0.773173	0.480967	0.184522	0.243609	0.627323	0.486637	0.370343	0.308991	0.588614	0.370627	0.529537	0.571674	0.658041	0.367088	0.421803	0.575342	0.556013	1.47944	1.42371	0.494726	0.57481	0.00705925				0.715689	0.366459	0.481548	0.241392	0.461418	0.690765	0.467339	0.766345	0.540529	0.448572	0.202764
215	0.191246	0.136191	0.234279	0.122444	0.178917	0.18387	0.212219	0.17223	0.0725712	0.0561491	0.232555	0.225329	0.587204	0.648395	0.378605	0.142585	0.276377	0.610183	0.470701	0.465473	0.291189	0.515525	0.417492	0.781532	0.645346	0.743188	0.566578	0.633257	0.757228	0.706585	1.4184	1.45526	0.690065	0.825604	0.199017				0.931234	0.576026	0.614484	0.428887	0.701627	0.898369	0.698128	1.05303	0.76606	0.660811	0.449884
216	0.201476	0.160665	0.272459	0.134482	0.207634	0.152882	0.169091	0.086258	0.0522621	0.0692793	0.102974	0.0607508	0.384075	0.481959	0.232504	0.00463034	0.132956	0.453774	0.305857	0.305138	0.114704	0.323755	0.239135	0.640433	0.474011	0.571626	0.411384	0.481785	0.608828	0.542515	1.15286	1.22679	0.534479	0.667857	0.041413				0.748199	0.400873	0.427275	0.255629	0.53563	0.734315	0.551467	0.913413	0.610818	0.520711	0.327585
217	0.0871374	0.0997289	0.244119	0.106179	0.227641	0.211359	0.219198	0.163698	0.0882529	0.0867546	0.244356	0.226046	0.561975	0.655672	0.419913	0.193234	0.321766	0.659066	0.487367	0.509332	0.325416	0.513252	0.403231	0.830189	0.673302	0.766624	0.609131	0.67814	0.805101	0.768143	1.32727	1.37293	0.720931	0.849155	0.292165				0.943914	0.587183	0.626076	0.457572	0.717716	0.908508	0.723002	1.11181	0.767948	0.672298	0.490067
218	0.186536	0.0390294	0.0598014	0.0329918	0.048933	0.133938	0.0109492	0.000552893	0.1852	0.234108	0.0118874	0.0407975	0.334654	0.398275	0.198926	0.0177452	0.0541589	0.417286	0.322745	0.308412	0.0938657	0.34118	0.267713	0.623742	0.466777	0.604061	0.444666	0.471936	0.610519	0.600048	1.20937	1.2336	0.553783	0.69538	0.0796023				0.833612	0.502176	0.523618	0.341085	0.63712	0.837377	0.626407	1.00648	0.719979	0.618255	0.400852
219	0.205252	0.0405894	0.161814	0.0208178	0.101926	0.023188	0.0440153	0.00747541	0.145233	0.25702	0.0555776	0.0441374	0.259499	0.319696	0.0939891	0.0757138	0.019547	0.310252	0.23578	0.246229	0.00678678	0.231369	0.211041	0.592488	0.384522	0.50959	0.386257	0.423326	0.5412	0.492224	1.09396	1.16817	0.490926	0.649793	0.0193059				0.755364	0.422069	0.41362	0.254465	0.570101	0.756883	0.564132	0.9363	0.658014	0.554864	0.351518
220	0.137249	0.00937714	0.1688	0.0771175	0.283289	0.11766	0.171498	0.176023	0.111954	0.0594182	0.130415	0.176574	0.446481	0.516588	0.340695	0.209094	0.288062	0.559294	0.471796	0.511238	0.252118	0.441169	0.424163	0.854168	0.619572	0.742689	0.640564	0.676231	0.792699	0.75393	1.22554	1.30751	0.72864	0.882856	0.263227				0.974914	0.642743	0.633475	0.490017	0.795746	0.977175	0.798669	1.1947	0.874016	0.778438	0.601028
221	0.0754905	0.106866	0.152535	0.0317879	0.0136691	0.0256138	0.24193	0.215948	0.154917	0.0555518	0.258964	0.262054	0.576708	0.674781	0.454349	0.270002	0.358765	0.690193	0.553761	0.571712	0.357095	0.554543	0.474024	0.89781	0.717792	0.829319	0.689718	0.737457	0.873915	0.839102	1.31622	1.38985	0.79654	0.92585	0.35559				1.01422	0.67518	0.696202	0.540215	0.8156	1.00854	0.836274	1.22915	0.884049	0.802817	0.632114
222	0.178733	0.026178	0.241359	0.0485313	0.0329241	0.0665715	0.18938	0.0927125	0.021873	0.0709104	0.062928	0.0355636	0.431782	0.488944	0.189474	0.0477348	0.173963	0.447314	0.348085	0.380509	0.161287	0.362584	0.324355	0.730611	0.531518	0.632418	0.51014	0.563988	0.680394	0.61682	1.19972	1.29628	0.620563	0.769245	0.132497				0.849541	0.503966	0.503449	0.355462	0.650447	0.832011	0.660626	1.03613	0.722465	0.62908	0.449688
223	0.17197	0.0809534	0.273631	0.0291584	0.107819	0.094693	0.114139	0.0227007	0.0564714	0.233114	0.162082	0.187937	0.118979	0.208836	0.0569716	0.119896	0.0136741	0.192699	0.121205	0.202139	0.053292	0.102698	0.132379	0.589721	0.320595	0.412812	0.35084	0.410185	0.498119	0.414207	0.92319	1.06237	0.446368	0.618637	0.0370782				0.679641	0.333611	0.295896	0.17975	0.49435	0.65227	0.494878	0.879608	0.559962	0.459314	0.298673
224	0.0355975	0.077877	0.107435	0.055808	0.0517981	0.00257057	0.0983594	0.0488127	0.164126	0.0939752	0.0137562	0.0577905	0.355505	0.444641	0.245371	0.255532	0.351484	0.517263	0.437748	0.553514	0.274285	0.395765	0.42197	0.914614	0.630215	0.730487	0.684607	0.727919	0.819276	0.771004	1.14613	1.26437	0.753559	0.919182	0.332388				0.988682	0.648042	0.615603	0.508387	0.810748	0.964927	0.810798	1.22668	0.864907	0.767314	0.625712
225	0.284778	0.089898	0.244035	0.131177	0.148533	0.0531353	0.218236	0.245901	0.313622	0.0732026	0.0744724	0.188233	0.410351	0.40442	0.251796	0.269734	0.224096	0.455777	0.445695	0.492682	0.167909	0.367828	0.395472	0.803402	0.537098	0.68293	0.607279	0.602879	0.72436	0.703372	1.09308	1.19098	0.664872	0.821637	0.200848				0.916583	0.602353	0.574741	0.448164	0.770023	0.946949	0.780044	1.18985	0.867159	0.781405	0.619969
226	0.45731	0.307047	0.472263	0.28842	0.339463	0.302827	0.363479	0.300833	0.354963	0.0613088	0.0484317	0.0688855	0.232565	0.235925	0.0157087	0.0464693	0.0504149	0.170199	0.198874	0.252043	0.0762502	0.116034	0.203002	0.596381	0.292322	0.418716	0.372356	0.38251	0.47722	0.403456	0.87561	1.0274	0.434017	0.610803	0.0954641				0.675689	0.358367	0.300972	0.190683	0.536931	0.700638	0.546297	0.92912	0.644746	0.553194	0.392719
227	0.212567	0.101479	0.292638	0.121721	0.211609	0.19466	0.260189	0.183679	0.29062	0.0826551	0.0143676	0.0608433	0.210578	0.28606	0.121881	0.260602	0.356004	0.349375	0.359002	0.506313	0.186357	0.278688	0.401438	0.891032	0.534581	0.628157	0.641821	0.680322	0.74292	0.653041	0.995373	1.18492	0.693493	0.879499	0.220812				0.911337	0.582995	0.508679	0.433326	0.764399	0.902004	0.773473	1.17104	0.835882	0.742866	0.620976
228	0.0848722	0.0329682	0.129014	0.0292623	0.0223067	0.000685227	0.0950237	0.0517692	0.193827	0.00696889	0.100282	0.00384392	0.0584706	0.218797	0.111385	0.366191	0.475849	0.432724	0.422813	0.624526	0.309762	0.358513	0.464076	0.994646	0.645023	0.732024	0.754053	0.788779	0.854399	0.796518	1.06046	1.22595	0.792247	0.969981	0.390723				1.01689	0.682896	0.620204	0.54931	0.859363	0.990303	0.86206	1.28699	0.906758	0.813159	0.706312
229	0.191306	0.0728316	0.204376	0.000338572	0.0480197	0.0361018	0.0702547	0.0175198	0.15476	0.0922863	0.24677	0.16326	0.168153	0.17112	0.275842	0.0693468	0.0727189	0.0336166	0.106626	0.356149	0.0388207	0.0473901	0.25143	0.754567	0.345166	0.449367	0.520283	0.531021	0.563592	0.511712	0.91271	1.07346	0.539537	0.757748	0.103571				0.830639	0.489574	0.394004	0.332055	0.677544	0.785913	0.639786	1.06655	0.724771	0.600135	0.470953
230	0.276004	0.179904	0.355001	0.135111	0.196694	0.210974	0.238989	0.132682	0.25016	0.0644216	0.109303	0.0871297	0.0574392	0.0497413	0.191042	0.0603762	0.126228	0.0519855	0.0583478	0.24951	0.0917194	0.0356187	0.185888	0.67527	0.255235	0.333996	0.423662	0.465532	0.485125	0.366633	0.72511	0.972924	0.465786	0.683087	0.0192723				0.699404	0.366349	0.250188	0.208579	0.559116	0.663726	0.550958	0.938372	0.618544	0.514189	0.407831
252	0.783776	0.577102	0.737317	0.599371	0.578063	0.583516	0.684374	0.628338	0.520897	0.416918	0.531572	0.519924	0.737127	0.727975	0.430101	0.337729	0.398507	0.478624	0.5638	0.431433	0.340743	0.615642	0.714376	0.609632	0.571631	0.652813	0.492592	0.514721	0.588562	0.366267	1.58276	1.75711	0.649918	0.802771	0.247807				0.8382	0.61309	0.550396	0.376647	0.731488	0.912385	0.756653	0.761502	0.932646	0.84837	0.587642
253	0.472022	0.265604	0.415476	0.26919	0.229912	0.248827	0.347485	0.288093	0.178443	0.0895517	0.20464	0.18725	0.413232	0.407523	0.0986883	0.00886173	0.0567805	0.155911	0.227436	0.0881148	0.0302854	0.311053	0.385237	0.257437	0.263566	0.340825	0.165145	0.196248	0.27546	0.0695669	1.35193	1.49724	0.35678	0.508135	0.502974				0.599812	0.372659	0.316395	0.122075	0.45686	0.632393	0.455074	0.434411	0.625778	0.534539	0.253767
254	0.559584	0.335096	0.489128	0.345833	0.295803	0.31083	0.421764	0.369572	0.260863	0.164447	0.275515	0.26275	0.455284	0.443882	0.154057	0.0668231	0.10761	0.188179	0.284481	0.131842	0.0810998	0.364599	0.454449	0.273452	0.295039	0.378745	0.20652	0.220077	0.302277	0.0977734	1.3806	1.5277	0.394982	0.542992	0.486197				0.639782	0.43248	0.367487	0.174564	0.519958	0.695999	0.520527	0.477115	0.705941	0.619044	0.335817
255	0.550164	0.32338	0.469419	0.323325	0.271621	0.280425	0.386744	0.335211	0.221952	0.119151	0.231104	0.217108	0.411443	0.398016	0.104071	0.00288031	0.0400873	0.138235	0.22442	0.0676669	0.00570411	0.296452	0.372098	0.215402	0.228149	0.317612	0.133723	0.14745	0.239045	0.0449007	1.31177	1.44445	0.31573	0.463069	0.554425				0.563034	0.338438	0.285132	0.0852208	0.436119	0.623794	0.440153	0.437818	0.626986	0.538026	0.252734
256	0.514164	0.288112	0.419501	0.278546	0.217009	0.227575	0.330085	0.281358	0.155719	0.0629765	0.190114	0.172354	0.382653	0.373276	0.0701079	0.0658271	0.0235723	0.114116	0.174915	0.00862929	0.0427694	0.260087	0.29615	0.145427	0.183055	0.27176	0.0575594	0.0778429	0.179631	0.00178818	1.29223	1.39178	0.242726	0.375004	0.600509				0.490936	0.261783	0.237276	0.0157284	0.344627	0.545208	0.348312	0.348251	0.529777	0.442958	0.146634
257	0.640873	0.403101	0.538458	0.402486	0.325221	0.342101	0.457163	0.414436	0.289772	0.201647	0.328848	0.31316	0.50002	0.488509	0.198142	0.0726814	0.0958302	0.224547	0.298137	0.11603	0.0872392	0.392241	0.424816	0.208269	0.28437	0.370657	0.144418	0.153367	0.257718	0.0813662	1.40062	1.48888	0.3256	0.440289	0.528573				0.556509	0.350757	0.336812	0.107896	0.425038	0.630007	0.436739	0.391804	0.625769	0.54837	0.249286
258	0.765124	0.534288	0.671431	0.515905	0.436239	0.462197	0.568969	0.516062	0.407492	0.315101	0.414347	0.394379	0.574492	0.551998	0.250869	0.1409	0.157428	0.258571	0.327311	0.147661	0.122322	0.406655	0.435308	0.210649	0.286422	0.354987	0.1265	0.139366	0.235982	0.044207	1.36321	1.45665	0.28255	0.390172	0.574854				0.470879	0.249324	0.243532	0.0266146	0.341368	0.547251	0.37117	0.338953	0.554146	0.481365	0.202028
259	0.765482	0.521795	0.649164	0.513941	0.427284	0.439782	0.55468	0.515324	0.383103	0.291145	0.422478	0.404736	0.588905	0.575883	0.282869	0.133944	0.147333	0.305541	0.361352	0.166857	0.129765	0.444828	0.445236	0.249785	0.326562	0.416981	0.163118	0.172136	0.291983	0.128357	1.42035	1.48542	0.326979	0.428623	0.512153				0.53116	0.303299	0.318868	0.0800568	0.394311	0.6218	0.425456	0.432547	0.611374	0.539088	0.243389
260	0.508512	0.278273	0.399665	0.259122	0.163529	0.198259	0.308864	0.265975	0.14309	0.0745409	0.204363	0.184412	0.39037	0.384329	0.0819266	0.0714634	0.0398927	0.131052	0.170868	0.0105408	0.0144426	0.295731	0.277173	0.0807445	0.192146	0.275048	0.0207494	0.0433978	0.15929	0.016889	1.36368	1.39846	0.218325	0.323966	0.563272				0.484066	0.250434	0.270855	0.0175618	0.304785	0.516552	0.298819	0.283071	0.471324	0.386244	0.0746179
261	0.759126	0.524439	0.659569	0.517105	0.408978	0.456416	0.579586	0.536768	0.424634	0.361588	0.479914	0.460432	0.642006	0.633608	0.341755	0.21105	0.224586	0.372328	0.424293	0.234096	0.250615	0.551311	0.532672	0.27785	0.419182	0.491366	0.228987	0.243216	0.356543	0.206017	1.56827	1.59835	0.405935	0.490891	0.388062				0.618853	0.394655	0.432382	0.18372	0.457732	0.674165	0.474892	0.429607	0.648591	0.575109	0.277514
262	0.774902	0.539881	0.675657	0.532654	0.419574	0.469438	0.595027	0.553156	0.44139	0.379643	0.498536	0.478861	0.661778	0.655578	0.362615	0.223619	0.235577	0.400339	0.443354	0.251859	0.26392	0.569774	0.536616	0.305585	0.442315	0.519228	0.246895	0.263425	0.385984	0.245714	1.58751	1.60525	0.421139	0.506054	0.357261				0.631711	0.386282	0.435276	0.184188	0.461316	0.687586	0.48418	0.48375	0.653173	0.577755	0.28157
263	0.75125	0.511692	0.629219	0.501541	0.38334	0.424098	0.547319	0.515845	0.385281	0.327143	0.470816	0.452175	0.644816	0.643454	0.353136	0.176286	0.189835	0.400834	0.424277	0.223999	0.231046	0.554889	0.48935	0.281725	0.425114	0.512114	0.218102	0.235087	0.369904	0.252767	1.57693	1.56965	0.394557	0.470436	0.357696				0.616654	0.373087	0.442685	0.172394	0.435979	0.674407	0.454744	0.468657	0.621975	0.548173	0.239416
264	0.687575	0.444125	0.548375	0.418304	0.287382	0.331156	0.450429	0.421792	0.294436	0.239125	0.374873	0.356083	0.530451	0.523007	0.240196	0.0680689	0.0663634	0.270508	0.293543	0.084617	0.117413	0.435987	0.353771	0.0962658	0.281337	0.361472	0.0553923	0.0678949	0.202272	0.0999684	1.45226	1.41868	0.234208	0.294998	0.490173				0.472998	0.246367	0.329441	0.0438479	0.284133	0.521865	0.291867	0.265646	0.461002	0.391506	0.0732798
265	0.871607	0.625945	0.736074	0.59808	0.459519	0.508914	0.631109	0.600801	0.484731	0.426262	0.543468	0.525121	0.674549	0.659008	0.382569	0.230436	0.207915	0.388183	0.41751	0.200776	0.243919	0.549341	0.461692	0.163804	0.367125	0.435373	0.118764	0.12578	0.257877	0.148325	1.50022	1.46072	0.269783	0.313329	0.458495				0.458931	0.227528	0.327218	0.0480613	0.280525	0.526245	0.312351	0.283283	0.481848	0.422443	0.1198
266	0.830001	0.562752	0.672946	0.559246	0.406325	0.441003	0.582637	0.565947	0.420254	0.363297	0.516138	0.497099	0.634467	0.636288	0.379021	0.187626	0.157565	0.397683	0.422742	0.181825	0.212782	0.557234	0.448085	0.179606	0.380157	0.481106	0.141966	0.14215	0.307051	0.223338	1.51577	1.46777	0.317027	0.360011	0.409166				0.527186	0.295207	0.402843	0.105042	0.352626	0.624734	0.392163	0.410902	0.566588	0.512733	0.190672
267	0.515816	0.249157	0.328937	0.218731	0.0531581	0.0883355	0.21737	0.206965	0.0582807	0.0113031	0.168466	0.148787	0.290304	0.293936	0.0416615	0.170264	0.196688	0.0745622	0.0773648	0.156504	0.105255	0.242078	0.0983971	0.153212	0.075575	0.18349	0.160921	0.156659	0.0153671	0.0199789	1.26971	1.17629	0.0472569	0.0940204	0.597916				0.351742	0.123382	0.237525	0.0877062	0.139451	0.405245	0.130666	0.152444	0.299169	0.233513	0.119019
268	0.586278	0.331514	0.423594	0.303484	0.137075	0.192347	0.323644	0.308738	0.184341	0.146745	0.282876	0.26593	0.39713	0.396532	0.1491	0.0257329	0.0593377	0.174649	0.18953	0.0361499	0.0427165	0.369347	0.233156	0.0727081	0.188716	0.279794	0.0588266	0.0565993	0.103071	0.0666779	1.39233	1.28791	0.142847	0.177343	0.484644				0.436829	0.216292	0.340226	0.0169917	0.220545	0.476102	0.208638	0.185712	0.372928	0.308863	0.035629
269	0.819681	0.564684	0.652877	0.519256	0.35519	0.404103	0.52528	0.507563	0.393708	0.337817	0.447279	0.432078	0.539627	0.51951	0.268487	0.109813	0.0510711	0.254064	0.267844	0.0341996	0.104492	0.410104	0.263894	0.0606854	0.19678	0.268247	0.0843513	0.0822942	0.06953	0.0126177	1.32566	1.22515	0.0678386	0.0889183	0.57244				0.290983	0.0483621	0.18498	0.121055	0.0831049	0.347658	0.105016	0.108625	0.266616	0.21343	0.104934
270	0.889969	0.62677	0.716911	0.609602	0.423885	0.476845	0.618299	0.612392	0.474449	0.440504	0.588878	0.570346	0.677454	0.683249	0.451349	0.244594	0.188576	0.464727	0.456748	0.207269	0.278508	0.615283	0.423615	0.139377	0.406594	0.499369	0.117902	0.119303	0.297419	0.27186	1.51267	1.39279	0.275959	0.280603	0.333117				0.477145	0.229742	0.401933	0.0810429	0.266576	0.553327	0.305864	0.353083	0.452701	0.409938	0.0902161
271	0.810398	0.553256	0.629496	0.524538	0.333741	0.39321	0.527858	0.52621	0.396744	0.372118	0.516369	0.500191	0.60288	0.606605	0.385319	0.186473	0.126701	0.399716	0.387838	0.147729	0.240202	0.567084	0.36289	0.0553703	0.35267	0.440663	0.061533	0.058554	0.231324	0.23485	1.48055	1.32757	0.221659	0.215605	0.332606				0.455856	0.224507	0.413461	0.0773303	0.231819	0.509934	0.245691	0.26203	0.389238	0.343955	0.0158518
272	0.874382	0.633125	0.720819	0.597171	0.41267	0.489617	0.619842	0.610243	0.51257	0.490556	0.601446	0.589928	0.682043	0.675929	0.456505	0.307049	0.238534	0.461756	0.464378	0.241572	0.353103	0.64997	0.461035	0.112514	0.427263	0.496391	0.132622	0.126726	0.281119	0.284435	1.55277	1.38855	0.27154	0.26201	0.258667				0.495457	0.252773	0.44451	0.12394	0.266148	0.528874	0.273769	0.277608	0.41622	0.363489	0.0504997
273	0.869778	0.588663	0.668239	0.566636	0.354922	0.398849	0.546603	0.548838	0.408707	0.371551	0.506451	0.484325	0.518639	0.521178	0.330445	0.134813	0.0279247	0.296396	0.291582	0.0116974	0.117953	0.450765	0.213313	0.144286	0.190147	0.28416	0.132893	0.143297	0.0558612	0.0680757	1.25226	1.09832	0.0293609	0.000421856	0.521113				0.239795	0.00880156	0.21274	0.134795	0.0221327	0.336264	0.0720287	0.10684	0.213367	0.200221	0.134987
274	0.689343	0.398871	0.468255	0.390356	0.155146	0.200275	0.359585	0.369996	0.206454	0.192457	0.360822	0.329522	0.366516	0.394639	0.222354	0.0188962	0.112717	0.220353	0.191255	0.0921593	0.0267065	0.384533	0.11063	0.204951	0.145429	0.262607	0.164125	0.173839	0.0489451	0.104337	1.22738	1.05242	0.0388055	0.00343293	0.460429				0.29571	0.0817841	0.303752	0.0715891	0.0659767	0.389794	0.0996994	0.142942	0.227005	0.219294	0.137226
275	0.52052	0.317936	0.390963	0.272151	0.0907868	0.203406	0.32406	0.325529	0.265007	0.280531	0.391446	0.396165	0.519287	0.528859	0.329995	0.19521	0.15191	0.412682	0.398809	0.23028	0.369598	0.661326	0.454919	0.173916	0.5055	0.597243	0.270846	0.264232	0.421306	0.523911	1.73269	1.5005	0.46452	0.482393	0.0919009				0.853142	0.606944	0.796687	0.458836	0.577925	0.804174	0.48478	0.539104	0.616831	0.514551	0.16886
276	1.16378	0.91428	1.02975	0.934975	0.703976	0.803167	0.978197	0.973381	0.858451	0.88194	1.02112	0.991921	1.02385	1.06235	0.906305	0.734501	0.63783	0.914506	0.91105	0.645166	0.807207	1.13047	0.871829	0.462757	0.86189	0.948654	0.523794	0.500008	0.697596	0.747149	1.86907	1.6757	0.64544	0.556999	0.170276				0.736444	0.512444	0.806744	0.462922	0.529674	0.851029	0.622578	0.622018	0.738461	0.749518	0.458999
277	1.1013	0.804884	0.846941	0.764249	0.520375	0.545181	0.683539	0.702951	0.549145	0.508467	0.636269	0.609095	0.567296	0.556709	0.413543	0.19759	0.0306146	0.308175	0.266286	0.0347694	0.0854651	0.385116	0.0476155	0.332705	0.0476903	0.110275	0.351617	0.36927	0.173519	0.116362	0.919931	0.712998	0.27782	0.372032	0.698615				0.147913	0.381641	0.0963698	0.455611	0.388272	0.0624046	0.312804	0.255849	0.227404	0.195356	0.486309
278	0.66737	0.402918	0.438564	0.354557	0.120724	0.176106	0.305795	0.325836	0.204723	0.195594	0.322128	0.304629	0.31057	0.314207	0.174162	0.01779	0.142475	0.148501	0.106633	0.136398	0.0082064	0.30479	0.00412192	0.340024	0.0455067	0.131301	0.274266	0.296039	0.103292	0.0224849	1.0544	0.806947	0.129788	0.19122	0.455686				0.157588	0.052063	0.214145	0.16406	0.104711	0.184881	0.120621	0.0726941	0.0270634	0.0417022	0.370478
279	0.928861	0.693343	0.756757	0.656436	0.438369	0.525812	0.659319	0.669552	0.583284	0.590784	0.696503	0.685912	0.706078	0.709609	0.567408	0.426878	0.311549	0.555554	0.539157	0.317056	0.481686	0.754701	0.481951	0.0927963	0.492889	0.560523	0.17768	0.146241	0.312518	0.431034	1.49195	1.23719	0.278964	0.201768	0.0366071				0.500719	0.290769	0.579855	0.227555	0.255792	0.524687	0.24967	0.258044	0.351376	0.331436	0.0386352
280	0.853531	0.608835	0.685672	0.590254	0.353934	0.442303	0.592777	0.598471	0.50526	0.522888	0.628308	0.604556	0.587264	0.607507	0.491251	0.349998	0.219575	0.472051	0.45353	0.213814	0.402039	0.682291	0.380112	0.0253751	0.409793	0.488064	0.0823786	0.0511775	0.24579	0.383866	1.36794	1.11971	0.215852	0.118809	0.0781941				0.432706	0.224483	0.532325	0.162998	0.180666	0.483615	0.203188	0.221682	0.281423	0.297171	0.00842697
281	1.03522	0.793533	0.845204	0.76371	0.520206	0.600449	0.739822	0.759222	0.6598	0.677056	0.789307	0.769358	0.73871	0.754132	0.655397	0.487658	0.341335	0.622255	0.576227	0.336822	0.506266	0.775209	0.428919	0.0704534	0.48631	0.554987	0.140042	0.105801	0.290934	0.447812	1.33921	1.06658	0.204405	0.0953511	0.0326414				0.368811	0.140422	0.47385	0.124292	0.116694	0.401399	0.141204	0.226568	0.199315	0.209113	0.048988
282	0.957041	0.736045	0.778824	0.689498	0.464742	0.555862	0.679885	0.702619	0.632654	0.652465	0.746824	0.741689	0.729	0.731804	0.633441	0.505588	0.368897	0.617153	0.586406	0.383281	0.561849	0.806672	0.496208	0.125056	0.541509	0.605668	0.235734	0.189903	0.351749	0.540854	1.43508	1.13305	0.299195	0.199423	0.128732				0.529379	0.328547	0.656897	0.307316	0.27995	0.528415	0.248922	0.301406	0.322567	0.305714	0.0464176
293	1.08537	0.905685	0.973485	0.850893	0.649222	0.760688	0.872869	0.876423	0.881526	0.910155	0.911018	0.910173	0.820169	0.808522	0.776551	0.793731	0.617308	0.729386	0.736801	0.600247	0.818654	0.955799	0.663843	0.249219	0.684666	0.721661	0.430108	0.337517	0.459742	0.757605	1.30425	0.981118	0.360699	0.234632	0.402831				0.534051	0.274214	0.628587	0.377578	0.304672	0.50269	0.261385	0.464879	0.297034	0.284328	0.144698
294	0.901647	0.690825	0.747445	0.627668	0.426489	0.510898	0.621662	0.633073	0.611901	0.607516	0.625097	0.631102	0.54956	0.518631	0.455431	0.45134	0.263917	0.377796	0.39677	0.233606	0.42206	0.585268	0.315171	0.129204	0.293025	0.328652	0.0188724	0.0611269	0.0618057	0.304096	1.07412	0.762854	0.00478358	0.0860674	0.0591304				0.294948	0.0521368	0.351071	0.047779	0.0372494	0.257652	0.0471996	0.087986	0.0250302	0.0151781	0.251679
295	0.945035	0.762865	0.777399	0.632917	0.492704	0.558538	0.609953	0.644709	0.683547	0.624153	0.584445	0.652493	0.587728	0.481874	0.405885	0.502282	0.27875	0.299926	0.360539	0.281099	0.383647	0.47552	0.286254	0.110219	0.193635	0.209903	0.0072958	0.112856	0.0845401	0.204602	1.05007	0.670423	0.158327	0.129458	0.17027				0.302279	0.0162211	0.154054	0.0580564	0.0593966	0.163929	0.203899	0.149107	0.011261	0.26712	0.520155
296	0.741232	0.48829	0.547186	0.44574	0.233913	0.269553	0.397106	0.416362	0.364927	0.324893	0.337867	0.336578	0.152471	0.105655	0.0977579	0.118509	0.145827	0.0866405	0.0313871	0.238616	0.070452	0.0724099	0.209965	0.7414	0.304959	0.285037	0.610266	0.708894	0.565489	0.309384	0.338626	0.0781608	0.595964	0.687179	0.629133				0.150542	0.352051	0.119374	0.475248	0.417257	0.138742	0.539071	0.384496	0.501839	0.479017	0.846576
297	0.64378	0.459428	0.556393	0.405548	0.219584	0.339111	0.455359	0.432189	0.447983	0.468323	0.446462	0.437419	0.386962	0.372451	0.280058	0.341589	0.207068	0.247819	0.280497	0.170241	0.417702	0.541391	0.338706	0.12397	0.335298	0.356143	0.115369	0.0595372	0.182781	0.430146	1.27775	1.00789	0.24724	0.182961	0.194833				0.64453	0.394931	0.667633	0.367249	0.37513	0.608027	0.257579	0.321023	0.336201	0.272461	0.037448
298	1.04769	0.828724	0.934499	0.794803	0.596246	0.68982	0.824551	0.805534	0.776759	0.771846	0.783223	0.768331	0.697628	0.680736	0.579787	0.594582	0.424172	0.49132	0.543552	0.349237	0.547463	0.727488	0.5192	0.0340275	0.409126	0.434179	0.0828043	0.0129579	0.148789	0.263115	1.24893	1.01533	0.0760904	0.0348189	0.215383				0.210881	0.0762861	0.208921	0.0819393	0.047503	0.245419	0.010802	0.0607303	0.102309	0.134317	0.109799
299	0.961305	0.76965	0.882187	0.724515	0.542965	0.651712	0.774014	0.742875	0.751353	0.754261	0.726254	0.714091	0.64711	0.62794	0.526321	0.600439	0.439471	0.456192	0.511646	0.371197	0.582284	0.717996	0.531982	0.00328406	0.439726	0.456964	0.150545	0.0768983	0.19523	0.350209	1.29481	1.05433	0.125343	0.0575371	0.105483				0.307757	0.0374203	0.193665	0.0409721	0.0323561	0.270402	0.0380285	0.250985	0.0974747	0.0686431	0.156054
300	0.824498	0.637993	0.733152	0.569402	0.411627	0.50651	0.606042	0.583153	0.615823	0.596204	0.534346	0.541733	0.457432	0.400651	0.315174	0.453061	0.279918	0.204328	0.292027	0.202568	0.40045	0.454797	0.344891	0.205681	0.19331	0.163077	0.0117312	0.119124	0.0737741	0.12294	1.05355	0.793928	0.0718932	0.10502	0.165302				0.325039	0.00419148	0.167568	0.0455988	0.0667514	0.233395	0.108424	0.0683922	0.0351059	0.101553	0.345294
301	1.04005	0.853784	0.947913	0.771112	0.625721	0.720931	0.809787	0.783791	0.816796	0.781267	0.719468	0.73421	0.687935	0.613278	0.485819	0.617382	0.457084	0.366582	0.462595	0.368448	0.533162	0.590779	0.523758	0.0462045	0.305733	0.251554	0.0713063	0.032017	0.0316465	0.037256	1.19018	0.935942	0.0960756	0.136751	0.340339				0.147143	0.221387	0.0472176	0.235534	0.144999	0.00975459	0.236711	0.219969	0.106659	0.180918	0.318101
302	1.15586	0.968678	1.0935	0.911106	0.758779	0.864548	0.972312	0.926499	0.949831	0.926044	0.869986	0.86473	0.830902	0.780969	0.630527	0.751492	0.60985	0.526457	0.620034	0.507388	0.673472	0.754724	0.703917	0.113873	0.468288	0.418805	0.184783	0.0983394	0.132549	0.0992547	1.37875	1.17381	0.0252566	0.0247915	0.41179				0.0847978	0.301023	0.130765	0.325631	0.199062	0.0203507	0.119881	0.0578649	0.0202165	0.0333751	0.164566
303	0.831715	0.654739	0.78685	0.600209	0.453328	0.562693	0.669851	0.614121	0.655998	0.642469	0.556997	0.543166	0.483271	0.439821	0.311761	0.479755	0.348936	0.20691	0.304165	0.232916	0.441827	0.462327	0.436219	0.142838	0.243953	0.169852	0.0285782	0.0469487	0.00961982	0.00461988	1.28703	1.09454	0.0179277	0.0281368	0.314052				0.293694	0.102063	0.0220958	0.191463	0.0131493	0.166228	0.0238661	0.124448	0.0635684	0.001871	0.162939
304	0.865987	0.669257	0.791553	0.615668	0.470591	0.558709	0.666532	0.624882	0.650823	0.616189	0.544197	0.540403	0.459289	0.397955	0.28968	0.451077	0.296975	0.144757	0.273212	0.17401	0.353398	0.382829	0.384517	0.244908	0.111372	0.0440213	0.0847976	0.201607	0.187134	0.224571	0.961038	0.843335	0.163688	0.219365	0.544238				0.149254	0.181601	0.115136	0.3301	0.107345	0.0832078	0.122228	0.376469	0.112244	0.0643583	0.0987184
305	1.01438	0.825912	0.96308	0.769557	0.6325	0.734662	0.839404	0.780793	0.808645	0.775307	0.702576	0.69159	0.664272	0.606555	0.442575	0.58934	0.474336	0.322664	0.438037	0.343416	0.509337	0.549899	0.575509	0.0128104	0.303355	0.223157	0.083237	0.00864008	0.0071521	0.129556	1.24704	1.1546	0.00121103	0.0171248	0.564512				0.100377	0.252707	0.171184	0.338833	0.13936	0.0387367	0.0536688	0.227779	0.105929	0.0719159	0.0433468
317	0.675566	0.521474	0.713664	0.471495	0.379571	0.501001	0.594379	0.469683	0.504858	0.460045	0.366887	0.3109	0.44707	0.425928	0.0858539	0.174333	0.211758	0.0771934	0.117356	0.0531566	0.108212	0.199656	0.264091	0.138011	0.173576	0.124037	0.0114024	0.0893133	0.13626	0.132131	1.13035	1.31938	0.158983	0.311548	0.571496				0.305356	0.057809	0.0980467	0.226085	0.0839193	0.233708	0.131453	0.279363	0.190344	0.120519	0.0426014
318	0.220711	0.019506	0.197838	0.00532745	0.0789544	0.019017	0.102321	0.0248709	0.0246873	0.0564514	0.101914	0.125262	0.110007	0.123667	0.33213	0.202829	0.245281	0.373613	0.19576	0.30453	0.264001	0.0867487	0.136974	0.114911	0.0660922	0.0250128	0.0369392	0.0337143	0.115233	0.0592191	1.17276	1.38264	0.343174	0.609866	0.423117				0.76054	0.444701	0.285611	0.18557	0.599424	0.681521	0.527382	0.66317	0.661707	0.530082	0.31347
319	0.472401	0.261125	0.417725	0.225203	0.148306	0.191767	0.295744	0.231488	0.221372	0.113608	0.0770409	0.0696027	0.0971656	0.0443733	0.176363	0.0682131	0.136549	0.267362	0.0929005	0.22525	0.221357	0.0494319	0.13692	0.215639	0.148806	0.083761	0.156463	0.1885	0.107665	0.312625	0.954751	1.14484	0.0642874	0.277316	0.790653				0.439775	0.174417	0.0242439	0.106502	0.323238	0.435549	0.273825	0.31868	0.46824	0.353936	0.118407
320	0.590273	0.39325	0.568668	0.36352	0.292995	0.35263	0.454813	0.369079	0.355022	0.258911	0.229206	0.204471	0.298901	0.26316	0.0110443	0.0554177	0.0455442	0.0517435	0.0780587	0.0354322	0.0503495	0.125888	0.279232	0.0582566	0.0662986	0.105895	0.0107809	0.0252195	0.0863203	0.152185	1.0811	1.28856	0.185928	0.370991	0.665124				0.429009	0.144227	0.0400236	0.0894227	0.295516	0.434357	0.303293	0.369756	0.456507	0.364091	0.154234
321	0.508979	0.327617	0.517449	0.3028	0.254201	0.314295	0.408555	0.308094	0.309306	0.210862	0.157406	0.128617	0.220211	0.187727	0.0796658	0.0236563	0.0383116	0.118947	0.0273704	0.0461529	0.0858369	0.0512174	0.26016	0.108563	0.0413003	0.0707114	0.0507587	0.0772339	0.103399	0.167802	0.954367	1.25836	0.22499	0.442307	0.6356				0.459188	0.175685	0.0238387	0.0596597	0.33661	0.440747	0.340514	0.405102	0.471595	0.379792	0.202433
322	0.501491	0.309999	0.47945	0.269166	0.22033	0.266795	0.353275	0.268939	0.271873	0.158337	0.0993445	0.0866325	0.141472	0.0819167	0.157164	0.0303918	0.0583879	0.247325	0.0720492	0.161541	0.192728	0.0693935	0.155816	0.116182	0.14076	0.110468	0.124107	0.136542	0.113911	0.381668	0.762852	1.06908	0.0414298	0.262868	0.856189				0.330943	0.0833269	0.105705	0.184593	0.237017	0.320688	0.213053	0.210633	0.380068	0.283503	0.095102
323	0.307334	0.105578	0.267793	0.0618985	0.00211177	0.0487591	0.140269	0.0603431	0.0416076	0.0656199	0.0934901	0.110288	0.0275356	0.075183	0.333989	0.260068	0.275238	0.392531	0.240376	0.358245	0.360211	0.188879	0.00972981	0.29103	0.255925	0.211903	0.278224	0.271307	0.21995	0.459555	0.799174	1.03833	0.0425221	0.170123	0.900878				0.323032	0.0728839	0.0964628	0.220961	0.180573	0.27776	0.126821	0.0925406	0.296447	0.190234	0.0475211
324	0.589669	0.39787	0.584929	0.379361	0.330277	0.38445	0.481791	0.387634	0.363877	0.265072	0.247597	0.220551	0.343486	0.311847	0.0299892	0.0863799	0.11117	0.00390677	0.137449	0.0411151	0.00566925	0.173297	0.351545	0.164809	0.131778	0.161965	0.0960265	0.119922	0.15165	0.121721	1.06603	1.33508	0.259445	0.449489	0.634403				0.462644	0.207043	0.0751864	0.0289956	0.352952	0.473738	0.368287	0.36961	0.516406	0.431089	0.233408
334	0.518354	0.261229	0.413915	0.261381	0.133338	0.17996	0.323619	0.28164	0.204019	0.131663	0.188565	0.17223	0.218322	0.196038	0.0156808	0.0213368	0.0840047	0.073877	0.0666561	0.137456	0.0546794	0.195799	0.259913	0.21699	0.0126455	0.0822063	0.121381	0.157811	0.0438119	0.200974	1.15032	1.22768	0.117321	0.205697	0.709126				0.450983	0.311746	0.255717	0.0201916	0.341635	0.519515	0.317824	0.106898	0.530502	0.466883	0.157518
335	0.695696	0.453767	0.617029	0.453928	0.314664	0.386292	0.532005	0.478881	0.422488	0.372377	0.404496	0.380352	0.416218	0.398122	0.190939	0.21169	0.149581	0.130278	0.26057	0.0737161	0.193291	0.40465	0.455348	0.0530612	0.213067	0.250043	0.0525112	0.0200768	0.117389	0.0457713	1.3116	1.37526	0.260588	0.322916	0.530168				0.523939	0.366638	0.341667	0.125674	0.412708	0.580104	0.410801	0.17081	0.601063	0.546671	0.275139
336	0.741622	0.504653	0.654534	0.48344	0.356553	0.416952	0.546011	0.495525	0.449289	0.37814	0.392456	0.376999	0.408004	0.370039	0.156171	0.19106	0.111579	0.0720296	0.205481	0.0214467	0.109357	0.310824	0.370921	0.128793	0.104972	0.139559	0.0651599	0.103105	0.00759888	0.183815	1.19487	1.25021	0.10009	0.175573	0.722717				0.346407	0.148669	0.123476	0.0885811	0.23607	0.420461	0.249663	0.0954661	0.461982	0.396632	0.13061
337	0.72161	0.471697	0.611938	0.452705	0.31985	0.369849	0.502824	0.46197	0.391153	0.315684	0.362593	0.34822	0.398188	0.366068	0.141416	0.125024	0.048893	0.0748674	0.191813	0.0177959	0.0573943	0.306123	0.329683	0.135372	0.0989594	0.158546	0.0890905	0.120059	9.52484e-05	0.148624	1.23098	1.25263	0.092536	0.160455	0.713905				0.349938	0.15474	0.160494	0.0848668	0.225308	0.440413	0.240522	0.120745	0.457565	0.393559	0.0951965
338	0.70532	0.447908	0.579598	0.430302	0.277705	0.332307	0.472102	0.43908	0.360123	0.29825	0.357016	0.340865	0.376265	0.349918	0.141461	0.108037	0.0196439	0.07355	0.178135	0.0457918	0.0614881	0.317623	0.295809	0.20872	0.0848983	0.143683	0.136244	0.170721	0.0381916	0.149399	1.22072	1.19464	0.0526667	0.0817721	0.688133				0.318569	0.148624	0.198142	0.0832883	0.17706	0.413292	0.192377	0.0200533	0.404966	0.358347	0.0406151
339	0.902009	0.658875	0.79298	0.63335	0.480037	0.546821	0.680644	0.642635	0.588169	0.531794	0.559879	0.545399	0.559641	0.523957	0.326838	0.333852	0.228315	0.237182	0.344999	0.138755	0.257471	0.470919	0.45039	0.0954526	0.212688	0.242163	0.0324192	0.0778697	0.0337758	0.0855514	1.28088	1.23478	0.0832273	0.0865671	0.639882				0.262842	0.06406	0.144327	0.115774	0.127761	0.368593	0.180002	0.0134619	0.394203	0.354064	0.0771601
340	0.856636	0.634069	0.769696	0.594336	0.450337	0.532027	0.653715	0.605242	0.567886	0.516145	0.530063	0.51459	0.568393	0.533075	0.300613	0.305369	0.225519	0.242296	0.323518	0.141367	0.252447	0.458684	0.426042	0.037822	0.24042	0.259352	0.0158241	0.0253835	0.0803388	0.0444771	1.36775	1.31083	0.114241	0.1544	0.576538				0.315031	0.0431112	0.118544	0.124745	0.122262	0.345454	0.155057	0.10297	0.328542	0.265069	0.00206116
341	1.01506	0.743577	0.887234	0.761366	0.580281	0.638668	0.80747	0.783067	0.676128	0.632663	0.730946	0.708062	0.731955	0.733085	0.54136	0.457251	0.354331	0.490237	0.578794	0.312901	0.418871	0.727056	0.647454	0.147945	0.464607	0.552122	0.198902	0.154886	0.329409	0.244932	1.55609	1.48756	0.346621	0.331215	0.402527				0.475316	0.279644	0.418264	0.118384	0.354286	0.659144	0.45367	0.376624	0.666967	0.645757	0.33685
342	0.727535	0.471603	0.616729	0.485291	0.290245	0.375212	0.545812	0.514246	0.427065	0.415471	0.498917	0.467106	0.486751	0.504897	0.326011	0.257245	0.169016	0.306353	0.37735	0.134585	0.306345	0.59782	0.48856	0.0181586	0.369469	0.455069	0.11343	0.085188	0.270202	0.247323	1.55566	1.44338	0.350609	0.335411	0.270281				0.607775	0.413072	0.561441	0.234592	0.432242	0.72315	0.467307	0.355423	0.660006	0.623534	0.276322
343	1.0698	0.843765	0.972256	0.813295	0.641584	0.730972	0.864859	0.829258	0.787453	0.75606	0.780921	0.766473	0.779371	0.754394	0.5643	0.558722	0.440911	0.496747	0.566323	0.3638	0.503128	0.716932	0.612308	0.0928324	0.440335	0.462747	0.127973	0.0942283	0.217214	0.158752	1.47461	1.33539	0.180622	0.148591	0.410613				0.283525	0.000477953	0.177325	0.089655	0.077506	0.35127	0.164008	0.144852	0.325304	0.295199	0.0434245
344	1.09484	0.863235	0.985798	0.831138	0.660507	0.740748	0.873249	0.843122	0.786234	0.743485	0.786921	0.776012	0.80901	0.782766	0.572373	0.525432	0.408448	0.512405	0.562713	0.339506	0.443811	0.688815	0.552117	0.104183	0.414146	0.448745	0.080452	0.0675542	0.208297	0.139087	1.42836	1.3088	0.148462	0.13315	0.463209				0.253074	0.0426028	0.125174	0.145655	0.0396384	0.319489	0.127583	0.181033	0.268013	0.239859	0.0193343
345	0.809186	0.569215	0.691263	0.558002	0.362378	0.454468	0.607207	0.584196	0.505174	0.496084	0.58112	0.560029	0.605018	0.61624	0.424121	0.325401	0.237133	0.425708	0.455602	0.2254	0.374708	0.667881	0.492573	0.0820045	0.44124	0.522145	0.153491	0.140322	0.317955	0.330974	1.57727	1.41806	0.327444	0.315312	0.206106				0.553953	0.294649	0.480137	0.165757	0.329998	0.614451	0.360782	0.390787	0.509798	0.464445	0.142376
346	1.13027	0.903346	1.04509	0.912982	0.698918	0.81652	0.984868	0.953983	0.886797	0.909425	0.985469	0.953407	0.966496	0.996053	0.837072	0.758272	0.654669	0.83318	0.863707	0.628409	0.815441	1.09126	0.886008	0.406635	0.820949	0.886421	0.489437	0.456982	0.632884	0.661722	1.81937	1.63579	0.574207	0.489712	0.0822358				0.618063	0.344344	0.623765	0.324272	0.40632	0.720867	0.52669	0.548696	0.649404	0.650079	0.393377
347	1.19922	0.976393	1.11318	0.975562	0.765254	0.87617	1.03692	1.00709	0.947905	0.95861	1.01868	0.991748	0.983239	1.00267	0.849903	0.783758	0.650589	0.819962	0.849536	0.604533	0.768426	1.03373	0.801563	0.328874	0.725756	0.777299	0.347648	0.32196	0.495107	0.505382	1.61249	1.4406	0.373792	0.28902	0.109002				0.376058	0.0581728	0.325334	0.0465011	0.13367	0.445948	0.276109	0.389108	0.348548	0.368846	0.150964
348	0.912089	0.674589	0.764048	0.631797	0.436277	0.510354	0.641118	0.634288	0.562121	0.530332	0.598698	0.592761	0.602467	0.589894	0.412145	0.305361	0.169474	0.375046	0.374081	0.13858	0.257365	0.531961	0.276821	0.0632075	0.273251	0.341971	0.0549324	0.0586245	0.118337	0.161778	1.27707	1.09955	0.0643955	0.054401	0.38195				0.287275	0.0136555	0.175903	0.121929	0.0354343	0.312241	0.0569898	0.218016	0.166202	0.122666	0.179242
349	0.841864	0.589028	0.677279	0.568808	0.347718	0.424033	0.574066	0.573671	0.471696	0.464065	0.571825	0.552418	0.560075	0.574791	0.418433	0.263482	0.14198	0.403799	0.39128	0.136632	0.281692	0.589138	0.311066	0.0428199	0.332974	0.424449	0.00934009	0.00323777	0.198467	0.273351	1.35827	1.16138	0.163267	0.122606	0.264403				0.388879	0.128356	0.360425	0.0229028	0.142605	0.446986	0.175163	0.275311	0.28434	0.266017	0.056902
357	0.304864	0.0735719	0.186536	0.0224906	0.119789	0.0595	0.0619012	0.0240249	0.0532735	0.114671	0.0386555	0.0569813	0.0936925	0.100419	0.180777	0.317444	0.316225	0.0784859	0.0582886	0.224568	0.189272	0.13704	0.0603913	0.0289326	0.0966647	0.232612	0.0110843	0.00354337	0.158817	0.152837	1.31496	1.25215	0.219514	0.358451	0.359072				0.617866	0.305729	0.332486	0.0888242	0.399516	0.609027	0.339525	0.570541	0.505468	0.378042	0.0521767
358	0.238035	0.0304115	0.150439	0.0444929	0.155794	0.0929612	0.0044077	0.0534669	0.0862397	0.1691	0.158501	0.17974	0.0400548	0.0557931	0.362135	0.4218	0.418683	0.289064	0.24895	0.387622	0.337319	0.0559652	0.0613371	0.146562	0.0526964	0.0630771	0.113232	0.0932135	0.0389825	0.00130114	1.21953	1.19587	0.138804	0.323074	0.452438				0.579792	0.248251	0.220078	0.0142493	0.358005	0.524297	0.266759	0.505943	0.433831	0.282104	0.0292028
359	0.433398	0.170756	0.281886	0.133641	0.00538238	0.01537	0.145301	0.12496	0.0395667	0.0620596	0.0016817	0.0087801	0.0196236	0.00399621	0.225038	0.295219	0.39921	0.262836	0.169377	0.423132	0.361869	0.0295734	0.0609451	0.388504	0.171951	0.0238617	0.298869	0.321986	0.126313	0.159732	1.0955	1.0526	0.0128986	0.117593	0.694939				0.421795	0.16245	0.157307	0.105677	0.256779	0.486915	0.20729	0.350369	0.438136	0.327818	0.0314439
360	0.403842	0.179704	0.290069	0.108195	0.0113509	0.0427973	0.141604	0.0934456	0.031563	0.0512717	0.00963747	0.0269321	0.110223	0.0804784	0.215823	0.30386	0.322273	0.194565	0.157495	0.334996	0.287021	0.00719132	0.0512276	0.254677	0.0985266	0.0119869	0.258403	0.232835	0.0966145	0.17392	1.14396	1.11435	0.0174767	0.119848	0.669892				0.372485	0.0711395	0.0754179	0.167712	0.149612	0.346761	0.0894453	0.2157	0.263125	0.142581	0.183482
361	0.669369	0.452545	0.612176	0.431073	0.32349	0.388863	0.510436	0.445336	0.385768	0.309958	0.354714	0.329059	0.482098	0.467895	0.164941	0.101354	0.101385	0.193094	0.251408	0.0873728	0.088483	0.356124	0.363822	0.190333	0.271167	0.340824	0.113316	0.139203	0.258813	0.104392	1.36423	1.42328	0.290169	0.413896	0.46417				0.516083	0.213745	0.220656	0.0144558	0.335463	0.543264	0.360097	0.483515	0.507681	0.421308	0.161633
362	0.584359	0.359596	0.519929	0.342014	0.230273	0.291568	0.419209	0.358194	0.306139	0.229844	0.260255	0.237911	0.339092	0.323272	0.0550195	0.0395726	0.011219	0.0508152	0.149497	0.022522	0.0106096	0.267283	0.320413	0.0437809	0.167007	0.242945	0.0403862	0.0463577	0.166419	0.0110513	1.33202	1.39355	0.249448	0.387914	0.5324				0.530085	0.245942	0.221335	0.0190236	0.365897	0.557655	0.367613	0.445217	0.540651	0.444766	0.173056
363	0.607896	0.372713	0.518593	0.350061	0.228112	0.285566	0.412874	0.361997	0.292535	0.219419	0.272113	0.252564	0.358435	0.339194	0.0735222	0.0247211	0.00906523	0.0642242	0.15019	0.0412783	0.00719654	0.278359	0.291699	0.0272851	0.142802	0.217243	0.0236034	0.0200508	0.106894	0.0327628	1.32938	1.35332	0.186934	0.298288	0.584546				0.473464	0.211429	0.213431	0.0191473	0.302941	0.510646	0.301339	0.321076	0.48607	0.396907	0.100032
364	0.498189	0.266564	0.410279	0.238826	0.136416	0.182471	0.299689	0.244773	0.165726	0.0809284	0.144881	0.124525	0.267512	0.24907	0.0380618	0.109176	0.113102	0.0237559	0.0558424	0.121379	0.108836	0.17255	0.203593	0.0321324	0.0768832	0.160037	0.0563644	0.0428015	0.0750292	0.0739063	1.25748	1.31329	0.160861	0.2977	0.622091				0.46952	0.203791	0.180734	0.0412169	0.296099	0.490948	0.279697	0.320852	0.460754	0.361835	0.063875
365	0.441363	0.217463	0.382931	0.205479	0.118433	0.167028	0.288438	0.223379	0.160326	0.0734693	0.11839	0.0969793	0.228743	0.214864	0.0629098	0.0857048	0.0805083	0.0492153	0.0618103	0.0904718	0.0885181	0.17003	0.267433	0.0411679	0.107585	0.188217	0.0313196	0.0430854	0.140734	0.0392251	1.27162	1.3895	0.258105	0.426707	0.563373				0.574433	0.309026	0.23821	0.0523852	0.418156	0.582708	0.395025	0.428167	0.571747	0.466389	0.190363
366	0.408651	0.183192	0.345814	0.166336	0.0682454	0.125162	0.247797	0.183131	0.126842	0.048971	0.0828514	0.0606286	0.169858	0.151384	0.114401	0.119581	0.128773	0.122947	0.0062531	0.166221	0.125292	0.11606	0.207931	0.100006	0.0250893	0.0910678	0.0712198	0.0620014	0.0338277	0.149565	1.21754	1.32817	0.178497	0.33739	0.640369				0.522021	0.274143	0.196833	0.00381317	0.359131	0.513507	0.322433	0.283784	0.501162	0.399587	0.115774
367	0.487999	0.259158	0.410226	0.23561	0.134714	0.188494	0.306443	0.246704	0.175669	0.0979734	0.15145	0.130198	0.2622	0.240296	0.0390234	0.0814178	0.0858695	0.0431143	0.0526935	0.118319	0.0831743	0.172549	0.226646	0.0759178	0.0591379	0.12096	0.0778724	0.066152	0.0315446	0.145468	1.23166	1.31439	0.143154	0.273773	0.668666				0.444304	0.208494	0.166905	0.0466162	0.279991	0.45558	0.260964	0.204801	0.440916	0.350494	0.0598782
368	0.613943	0.398301	0.567205	0.388235	0.306804	0.363154	0.478783	0.407305	0.339222	0.260835	0.314115	0.289009	0.452468	0.436023	0.138569	0.0976398	0.123067	0.154002	0.246294	0.0988298	0.100549	0.345871	0.424426	0.193531	0.263456	0.316996	0.143427	0.166659	0.24538	0.0344894	1.36604	1.49727	0.33323	0.474244	0.514234				0.56281	0.314143	0.265438	0.0820821	0.415405	0.585021	0.423745	0.397386	0.588361	0.50142	0.242034
369	0.422315	0.200903	0.378445	0.202537	0.127034	0.176354	0.299252	0.229432	0.167916	0.084258	0.127897	0.106737	0.236887	0.222936	0.0465235	0.0467309	0.030153	0.0417695	0.0883598	0.0509994	0.0445322	0.190599	0.324028	0.0657769	0.127251	0.192019	0.0696589	0.0817752	0.153431	0.0629497	1.24563	1.4225	0.30194	0.47607	0.56173				0.607026	0.377774	0.269358	0.106746	0.470111	0.606815	0.4444	0.384329	0.615505	0.519152	0.255921
370	0.648205	0.398252	0.559971	0.406815	0.316908	0.34465	0.477992	0.431475	0.347691	0.250884	0.318553	0.30854	0.398913	0.372749	0.134722	0.122931	0.092657	0.0973015	0.247208	0.0674082	0.073135	0.331809	0.450162	0.0907311	0.19547	0.275793	0.115007	0.0851422	0.173258	0.0252661	1.2771	1.41916	0.304805	0.437613	0.601495				0.570833	0.40421	0.317297	0.130669	0.495167	0.660189	0.491456	0.372498	0.706394	0.628251	0.348126
371	0.681634	0.446795	0.604546	0.441709	0.3615	0.395306	0.513882	0.457511	0.3728	0.279224	0.348448	0.332687	0.467275	0.440659	0.168187	0.128692	0.127179	0.150421	0.268225	0.0993662	0.0946205	0.349869	0.442463	0.143089	0.227538	0.291141	0.115453	0.111131	0.189319	0.022009	1.29574	1.43469	0.288407	0.415119	0.6006				0.509725	0.31942	0.257313	0.0701542	0.409337	0.580468	0.420515	0.323349	0.614644	0.539118	0.269096
372	0.688473	0.466783	0.630979	0.45655	0.398397	0.428062	0.534079	0.467448	0.396303	0.290796	0.338914	0.323377	0.461752	0.427822	0.150063	0.136802	0.146144	0.125473	0.253393	0.107682	0.0764464	0.30618	0.43672	0.175829	0.205493	0.259892	0.123901	0.123875	0.179917	0.0607135	1.20455	1.39723	0.278772	0.426858	0.636276				0.479141	0.283791	0.18799	0.0353505	0.395241	0.546967	0.410682	0.329405	0.599495	0.521622	0.275605
373	0.777976	0.542059	0.714182	0.553704	0.488786	0.514598	0.63747	0.581078	0.508928	0.404448	0.457367	0.44862	0.552192	0.519566	0.274609	0.287852	0.276988	0.234673	0.394535	0.243875	0.2233	0.450501	0.609354	0.288875	0.334139	0.397043	0.282868	0.258413	0.310529	0.0733881	1.3116	1.51793	0.435852	0.583322	0.501824				0.641131	0.486303	0.36635	0.227407	0.597468	0.734674	0.606922	0.476293	0.810514	0.736595	0.492238
374	0.665944	0.435967	0.596671	0.427203	0.356911	0.390022	0.502071	0.440457	0.36512	0.26722	0.320527	0.305774	0.43068	0.395865	0.128537	0.116289	0.115001	0.0926777	0.226314	0.0689609	0.0657521	0.294484	0.416109	0.0926746	0.167769	0.216453	0.072752	0.064512	0.11841	0.116132	1.16978	1.35149	0.233799	0.363336	0.670203				0.436554	0.280985	0.185603	0.0265399	0.362462	0.506767	0.371828	0.216225	0.563809	0.495517	0.242971
375	0.822262	0.601139	0.76484	0.595556	0.540641	0.568736	0.673867	0.607834	0.529396	0.426235	0.484515	0.468745	0.617305	0.583511	0.301857	0.277645	0.293143	0.277289	0.40104	0.253151	0.221963	0.451856	0.576394	0.307257	0.340408	0.388083	0.246138	0.246093	0.293954	0.0450852	1.30838	1.50397	0.38218	0.515901	0.542441				0.537613	0.365414	0.277737	0.129519	0.472676	0.624105	0.501025	0.38553	0.690036	0.621092	0.380676
376	0.514436	0.293673	0.473203	0.309407	0.264974	0.292212	0.407495	0.342064	0.271855	0.170821	0.226393	0.215144	0.350997	0.327938	0.0682164	0.077627	0.102697	0.0604088	0.213015	0.0857022	0.055414	0.278296	0.453096	0.201475	0.212209	0.273786	0.186966	0.188735	0.230399	0.0171251	1.203	1.44487	0.38339	0.558589	0.526937				0.636053	0.469164	0.319573	0.191479	0.55639	0.672392	0.542673	0.415215	0.721398	0.639069	0.392667
377	0.584046	0.34781	0.517784	0.36348	0.312275	0.328157	0.447488	0.393991	0.315924	0.206472	0.26878	0.264314	0.374352	0.341866	0.101083	0.114289	0.113511	0.0668547	0.23623	0.0912907	0.0651572	0.293636	0.470311	0.157706	0.191464	0.25929	0.165957	0.144062	0.187773	0.0503661	1.15607	1.38816	0.34584	0.505197	0.578247				0.593842	0.473258	0.317842	0.186088	0.550038	0.666807	0.536517	0.361848	0.735828	0.662502	0.408838
386	0.430987	0.208102	0.392561	0.229834	0.18372	0.210209	0.332302	0.268851	0.203173	0.100365	0.153908	0.144307	0.272007	0.255986	0.00478883	0.0241351	0.0469198	0.0105732	0.170698	0.0506302	0.0102318	0.241893	0.43059	0.214195	0.204005	0.282941	0.209844	0.210625	0.263595	0.0318972	1.24632	1.48154	0.425759	0.625026	0.475166				0.727072	0.521747	0.368106	0.237608	0.628367	0.746306	0.600002	0.540489	0.779381	0.681101	0.429495
387	0.575942	0.348117	0.522387	0.364215	0.33104	0.335661	0.450595	0.397338	0.333343	0.2037	0.253143	0.255401	0.363928	0.332772	0.0963212	0.129667	0.128672	0.0802856	0.258226	0.140071	0.0530587	0.287648	0.497775	0.302791	0.241998	0.336832	0.274013	0.251543	0.304732	0.0797667	1.2293	1.46472	0.438687	0.642954	0.487981				0.715754	0.506864	0.352966	0.231131	0.652006	0.78159	0.637271	0.637805	0.839297	0.738337	0.495854
388	0.455604	0.249045	0.423696	0.248969	0.223102	0.240566	0.339444	0.267255	0.201294	0.0837036	0.133018	0.120226	0.283646	0.262295	0.0179944	0.024356	0.0172041	0.000965181	0.131744	0.0246132	0.0594203	0.173853	0.343664	0.224064	0.157374	0.234202	0.14799	0.164127	0.217547	0.0157861	1.15838	1.38611	0.329461	0.527721	0.556753				0.592844	0.352244	0.223231	0.089693	0.482189	0.619903	0.472512	0.494937	0.646196	0.545552	0.30298
389	0.620711	0.396278	0.566147	0.405069	0.353884	0.375263	0.490015	0.429757	0.347376	0.240286	0.312863	0.300389	0.4581	0.438863	0.161343	0.127048	0.150442	0.174107	0.296881	0.157146	0.0985593	0.357274	0.487382	0.303048	0.296125	0.37711	0.240661	0.24521	0.319074	0.101411	1.3394	1.51745	0.41499	0.58082	0.481589				0.652696	0.426448	0.337432	0.173624	0.548891	0.713159	0.555615	0.551424	0.741735	0.651044	0.392357
390	0.724347	0.495482	0.665916	0.500841	0.439322	0.463588	0.582126	0.522999	0.449762	0.339168	0.396153	0.38448	0.515382	0.489195	0.221345	0.206316	0.206489	0.210941	0.343554	0.196229	0.140865	0.392696	0.525514	0.308736	0.310229	0.389517	0.249011	0.241221	0.318988	0.100622	1.33137	1.50498	0.402541	0.560376	0.505468				0.616267	0.387388	0.306051	0.144778	0.526978	0.698694	0.548724	0.558673	0.740969	0.655326	0.406727
391	0.665615	0.483057	0.703417	0.514424	0.455893	0.541209	0.665793	0.564266	0.516692	0.462889	0.505968	0.464667	0.691016	0.705815	0.376432	0.348178	0.44682	0.463162	0.53196	0.447612	0.413572	0.629364	0.73333	0.67419	0.639797	0.674969	0.547953	0.612009	0.667706	0.417764	1.64383	1.84602	0.723419	0.884923	0.116307				0.87119	0.572946	0.521851	0.380026	0.710043	0.871138	0.753085	0.813484	0.862606	0.779251	0.570984
392	0.533117	0.328345	0.538139	0.386489	0.327333	0.392037	0.534389	0.4646	0.38616	0.330888	0.432879	0.411665	0.643564	0.667748	0.365461	0.303994	0.392313	0.480984	0.564661	0.462738	0.418956	0.688752	0.788447	0.71754	0.701167	0.780713	0.639651	0.681153	0.761369	0.563122	1.81318	1.96274	0.846819	1.01696	0.0225552				1.08487	0.803433	0.751919	0.579833	0.920616	1.08834	0.925184	0.985136	1.06448	0.962703	0.708793
393	0.259096	0.0247275	0.204294	0.0600763	0.0256872	0.0210366	0.168467	0.117536	0.0201544	0.0447921	0.0696256	0.0538696	0.239302	0.260149	0.0144467	0.0897529	0.0423482	0.080891	0.183995	0.0423229	0.0270518	0.335962	0.42529	0.277748	0.322943	0.438385	0.279013	0.294305	0.405157	0.261604	1.5605	1.65226	0.536857	0.715151	0.259189				0.900918	0.638126	0.576329	0.369662	0.727998	0.898903	0.682233	0.731428	0.858332	0.739277	0.433485
394	0.519379	0.27956	0.442782	0.288504	0.205042	0.231818	0.364531	0.315584	0.223147	0.125149	0.214123	0.200469	0.349026	0.343831	0.0715243	0.00426621	0.0100285	0.109816	0.216229	0.0530423	0.00780616	0.309315	0.390607	0.227971	0.25339	0.364591	0.185854	0.185287	0.301986	0.146212	1.38106	1.48122	0.384474	0.542816	0.437946				0.673368	0.410764	0.364248	0.164905	0.533997	0.727374	0.531194	0.619555	0.717329	0.617042	0.334562
395	0.541777	0.335259	0.466193	0.272566	0.195768	0.236248	0.3202	0.247419	0.167574	0.0684523	0.125101	0.0933887	0.3046	0.279407	0.0610432	0.181574	0.140278	0.0170608	0.00799537	0.141524	0.181158	0.091135	0.0908787	0.0147875	0.0407707	0.111655	0.102791	0.0600573	0.0474806	0.11091	1.12384	1.20068	0.0800351	0.222832	0.668542				0.342558	0.0401946	0.0284352	0.177831	0.150284	0.346716	0.148665	0.275666	0.299106	0.20033	0.0720533
396	0.436804	0.214913	0.349753	0.184026	0.0931368	0.135885	0.243308	0.186915	0.0861002	0.00901446	0.107712	0.0838298	0.294764	0.288207	0.0272449	0.160477	0.118884	0.0403998	0.0786936	0.0800292	0.100651	0.198454	0.196969	0.0778803	0.14144	0.230356	0.00531539	0.0367734	0.154078	0.0181113	1.30399	1.35092	0.21172	0.349848	0.539292				0.509917	0.227097	0.223695	0.00461792	0.315635	0.516723	0.298175	0.384416	0.461416	0.357857	0.0590203
397	0.77267	0.53021	0.646129	0.490495	0.373547	0.406508	0.517768	0.47708	0.366345	0.278968	0.376954	0.356387	0.515631	0.492011	0.194294	0.0447456	0.0312146	0.201835	0.230962	0.0231348	0.0198872	0.325295	0.264823	0.0593786	0.185075	0.26509	0.0262349	0.00868792	0.128814	0.000646487	1.28292	1.29273	0.13835	0.223806	0.615888				0.355492	0.0866004	0.138099	0.114157	0.177424	0.41826	0.207803	0.278463	0.375513	0.30347	0.0090122
398	0.837662	0.606281	0.77005	0.638249	0.510056	0.580122	0.733468	0.696016	0.583242	0.541462	0.682045	0.664811	0.868479	0.884886	0.594274	0.426136	0.446926	0.681866	0.697547	0.511985	0.496841	0.82105	0.745165	0.623235	0.723963	0.816192	0.522999	0.548347	0.696679	0.580844	1.79237	1.80071	0.68159	0.760193	0.0442699				0.846946	0.551801	0.633321	0.388211	0.658302	0.907831	0.714675	0.843676	0.847124	0.77856	0.508199
399	0.786896	0.560772	0.709885	0.584544	0.475238	0.531597	0.670274	0.635846	0.512936	0.465516	0.619537	0.604043	0.833442	0.847555	0.548566	0.36364	0.403408	0.646373	0.654147	0.480202	0.450796	0.776387	0.709548	0.617156	0.697954	0.793229	0.512964	0.542313	0.6833	0.567061	1.79127	1.80398	0.680606	0.771927	0.0504265				0.875853	0.586591	0.655504	0.408077	0.684884	0.92565	0.721493	0.839237	0.861501	0.782865	0.50105
400	0.319	0.128991	0.237175	0.0670527	0.0392805	0.0448074	0.13523	0.0824498	0.00253823	0.0331481	0.0680378	0.0500448	0.31255	0.308361	0.023707	0.183009	0.117036	0.0937444	0.0795756	0.0501415	0.0323092	0.255201	0.181882	0.0932727	0.207541	0.281121	0.0314775	0.0801449	0.192928	0.112874	1.44303	1.40245	0.238539	0.363481	0.391877				0.580864	0.269543	0.314153	0.0615626	0.324053	0.515603	0.26466	0.370652	0.403453	0.277837	0.0342268
401	0.563698	0.313396	0.372886	0.224074	0.0831715	0.106559	0.195707	0.168735	0.0403475	0.0398161	0.0708371	0.0484338	0.211245	0.185501	0.110528	0.318491	0.333606	0.092208	0.114035	0.324136	0.30473	0.00985389	0.131448	0.298622	0.131332	0.0436914	0.365461	0.341516	0.189325	0.247607	1.01327	0.944792	0.182042	0.104427	0.81933				0.121614	0.155456	0.0729196	0.36104	0.103463	0.140798	0.121219	0.0167678	0.0382469	0.0467135	0.375991
402	0.592577	0.337918	0.410493	0.278474	0.130174	0.15601	0.264347	0.243142	0.0979099	0.0318317	0.172782	0.149362	0.326306	0.323699	0.0372165	0.201657	0.201383	0.0943973	0.0619382	0.144413	0.144362	0.191078	0.0402085	0.0583869	0.0801548	0.188702	0.131038	0.108603	0.0585167	0.0152077	1.19269	1.13065	0.0542298	0.135246	0.570666				0.343577	0.0557066	0.143667	0.138422	0.124528	0.376419	0.119275	0.277772	0.269155	0.185192	0.135324
407	0.439991	0.247551	0.405119	0.248519	0.180445	0.234482	0.34564	0.285673	0.178944	0.121958	0.258289	0.235346	0.544915	0.563005	0.229078	0.0423282	0.144627	0.394533	0.369597	0.272939	0.174038	0.466835	0.42694	0.541607	0.4973	0.594607	0.38428	0.435017	0.557513	0.448036	1.50639	1.56177	0.550748	0.69062	0.112106				0.797971	0.469378	0.490178	0.283083	0.587532	0.794894	0.592393	0.820894	0.707681	0.605204	0.348153
408	0.373772	0.137198	0.290836	0.154361	0.0733834	0.0949399	0.229854	0.190987	0.0650754	0.0166411	0.13181	0.120259	0.352988	0.371729	0.080894	0.0752876	0.0197132	0.210234	0.254026	0.119764	0.028833	0.35834	0.371477	0.386123	0.362016	0.492594	0.292771	0.310262	0.443355	0.342202	1.45599	1.51029	0.482054	0.636302	0.236195				0.784601	0.487787	0.479897	0.264484	0.60543	0.814355	0.594558	0.786089	0.753123	0.645483	0.358789
409	0.57365	0.367458	0.534166	0.380752	0.33522	0.359598	0.469941	0.408691	0.302544	0.210579	0.32985	0.308432	0.564276	0.57079	0.251391	0.112503	0.18939	0.359325	0.38912	0.272011	0.163724	0.455311	0.483451	0.520178	0.460389	0.556651	0.368109	0.406584	0.516223	0.356027	1.46405	1.577	0.532175	0.681518	0.235569				0.753581	0.454517	0.440293	0.24723	0.584984	0.789451	0.607533	0.773623	0.747426	0.654715	0.400036
410	0.525242	0.342708	0.519444	0.345807	0.320257	0.348901	0.442791	0.361529	0.269594	0.173222	0.272196	0.239487	0.524818	0.53519	0.197095	0.0593417	0.163514	0.326031	0.331973	0.247347	0.112879	0.380455	0.408433	0.535672	0.426576	0.513228	0.346706	0.400355	0.501876	0.336624	1.35404	1.49115	0.501306	0.658053	0.231694				0.709781	0.393005	0.371999	0.19717	0.532856	0.728644	0.558709	0.768032	0.677149	0.58469	0.352242
411	0.279754	0.0867772	0.273892	0.0939473	0.0420487	0.092379	0.209725	0.129765	0.0545666	0.0248702	0.0640368	0.0356819	0.313815	0.338249	0.00905523	0.0905058	0.0185947	0.178264	0.212385	0.153202	0.0348226	0.30568	0.362378	0.496681	0.386359	0.485447	0.351246	0.39782	0.494341	0.359199	1.39385	1.50932	0.525265	0.705577	0.163781				0.802042	0.472868	0.435384	0.266815	0.609227	0.784548	0.598606	0.832285	0.719695	0.605465	0.364554
412	0.26015	0.0542911	0.252059	0.0864363	0.0375144	0.0805062	0.212346	0.141187	0.0677402	0.0150569	0.0742366	0.055247	0.288153	0.314861	0.0151686	0.0401743	0.0503237	0.160589	0.244051	0.176392	0.0717805	0.345422	0.458749	0.524243	0.419635	0.525183	0.418539	0.453971	0.540485	0.385241	1.4809	1.62297	0.610029	0.807211	0.13513				0.90457	0.591715	0.525305	0.36562	0.729535	0.892629	0.711836	0.899697	0.848616	0.730462	0.483835
413	0.441961	0.251124	0.444428	0.277062	0.270041	0.285912	0.390252	0.315089	0.246288	0.12947	0.206007	0.190605	0.423378	0.43099	0.13125	0.0817103	0.169286	0.242457	0.319955	0.260426	0.104653	0.354973	0.479455	0.584154	0.424067	0.519281	0.422043	0.459339	0.534825	0.347953	1.35095	1.54165	0.57555	0.767288	0.203241				0.810687	0.509342	0.433181	0.290885	0.664187	0.831841	0.675325	0.864961	0.810756	0.708582	0.48528
414	0.0967623	0.235738	0.039281	0.168645	0.198573	0.0783386	0.0565985	0.0845561	0.108557	0.112929	0.0673902	0.127533	0.225892	0.318918	0.0428852	0.059938	0.17987	0.242742	0.258894	0.322952	0.223214	0.403394	0.524004	0.821233	0.6276	0.670972	0.633815	0.751184	0.790217	0.593443	1.57933	1.79458	0.842835	1.05927	0.195913				1.0904	0.717879	0.643882	0.530906	0.85232	0.977287	0.837669	1.07513	0.885317	0.763292	0.574713
415	0.0865683	0.160834	0.040989	0.0641713	0.0822367	0.105219	0.0689695	0.0564992	0.0176439	0.151424	0.0206869	0.0212851	0.158504	0.198155	0.0232698	0.0870206	0.123291	0.194329	0.407018	0.404151	0.19748	0.487298	0.746841	0.867845	0.631716	0.801608	0.809398	0.785398	0.851455	0.738994	1.67465	1.84019	0.962526	1.21193	0.218126				1.32574	1.03251	0.906103	0.785447	1.20318	1.33787	1.15554	1.3992	1.3218	1.18247	0.946698
416	0.132743	0.0487436	0.183855	0.00297559	0.0230962	0.0352722	0.166798	0.068606	0.0323272	0.0400173	8.15478e-05	0.0298388	0.178514	0.22442	0.0622003	0.0324256	0.0942133	0.0911211	0.203504	0.196229	0.0970054	0.305706	0.502484	0.626512	0.455408	0.530963	0.518788	0.585251	0.624393	0.413376	1.45175	1.69993	0.730373	0.965067	0.0227644				1.00867	0.684392	0.563695	0.459523	0.830592	0.948557	0.811274	0.980703	0.910509	0.792414	0.588873
422	0.361177	0.173182	0.340394	0.187083	0.193479	0.190759	0.277686	0.210747	0.116067	0.00132192	0.104785	0.0933353	0.337683	0.340356	0.0390768	0.0439266	0.0474113	0.138129	0.211057	0.129303	0.00990395	0.253899	0.372346	0.424369	0.298608	0.395089	0.281657	0.319881	0.393105	0.197603	1.29158	1.47486	0.455787	0.65043	0.360579				0.719422	0.438211	0.351915	0.195343	0.572421	0.737818	0.56584	0.694555	0.721387	0.61267	0.361285
423	0.457723	0.229188	0.379674	0.281775	0.287094	0.245853	0.358253	0.337837	0.211201	0.079945	0.23965	0.256853	0.467465	0.46614	0.211993	0.118372	0.16928	0.297472	0.408101	0.293193	0.141328	0.451486	0.581245	0.565124	0.460524	0.59617	0.466052	0.466681	0.559977	0.393733	1.51018	1.66156	0.641433	0.832374	0.215421				0.942356	0.700697	0.612352	0.431433	0.828561	1.01059	0.8131	0.913588	1.00894	0.899532	0.613647
424	0.357917	0.150069	0.332553	0.20305	0.180955	0.200111	0.322935	0.272663	0.173	0.0866237	0.216481	0.212832	0.450158	0.464558	0.177465	0.0986551	0.183522	0.290354	0.383928	0.283562	0.19202	0.479008	0.598131	0.564575	0.504465	0.60919	0.482654	0.513024	0.59433	0.409881	1.61382	1.77105	0.695354	0.886583	0.13584				0.996241	0.73359	0.6508	0.474655	0.842065	1.00532	0.818469	0.885	0.982523	0.869453	0.592329
425	0.556824	0.350971	0.516895	0.363301	0.329262	0.347537	0.45206	0.389122	0.288433	0.190223	0.297717	0.279979	0.512721	0.511941	0.202079	0.0987415	0.16924	0.281764	0.345988	0.225939	0.130436	0.411157	0.487017	0.45398	0.402006	0.491622	0.327612	0.36049	0.450501	0.259322	1.43961	1.585	0.501303	0.664179	0.32825				0.733366	0.460173	0.41227	0.230068	0.584903	0.771743	0.597078	0.691407	0.755812	0.659546	0.398397
426	0.644586	0.450937	0.600065	0.445856	0.41221	0.429953	0.519349	0.452501	0.339399	0.248334	0.366341	0.340057	0.600456	0.600729	0.271191	0.122458	0.204833	0.356928	0.380459	0.253595	0.157972	0.441915	0.46897	0.464761	0.423919	0.504623	0.306451	0.351628	0.449632	0.262649	1.4386	1.56324	0.468129	0.610768	0.341266				0.666623	0.383392	0.368447	0.172081	0.503946	0.706983	0.531078	0.639036	0.677605	0.588969	0.329419
427	0.656432	0.448231	0.614878	0.496696	0.456874	0.481643	0.604248	0.561642	0.444772	0.370961	0.523323	0.515396	0.76863	0.782253	0.482278	0.349052	0.426249	0.5908	0.645289	0.515703	0.436443	0.742223	0.79051	0.738934	0.72422	0.823194	0.630804	0.662224	0.764322	0.592621	1.82106	1.92996	0.816939	0.964294	0.00606196				1.05155	0.78818	0.768258	0.561195	0.894256	1.09352	0.904509	0.973387	1.06419	0.968413	0.688421
428	0.527793	0.310307	0.484346	0.357954	0.293943	0.336857	0.473002	0.428241	0.317627	0.256983	0.402206	0.391638	0.631575	0.650007	0.354229	0.233184	0.303992	0.46652	0.530855	0.395619	0.347657	0.657598	0.705759	0.614416	0.635416	0.736675	0.543686	0.572194	0.678614	0.520749	1.7939	1.88329	0.753553	0.903201	0.0516471				1.02573	0.761841	0.741051	0.526714	0.855665	1.04896	0.848396	0.902689	1.01018	0.907689	0.616429
429	0.613269	0.401486	0.556562	0.41749	0.344881	0.388992	0.509241	0.459501	0.346248	0.28326	0.420499	0.40249	0.652798	0.662589	0.348358	0.195401	0.262977	0.451649	0.48031	0.336678	0.285404	0.592162	0.591204	0.526503	0.553805	0.644729	0.418912	0.455175	0.569893	0.420373	1.66631	1.73187	0.602876	0.732188	0.171152				0.837032	0.554138	0.5672	0.34416	0.654546	0.865215	0.66607	0.759656	0.816021	0.721768	0.439783
430	0.584096	0.37095	0.507853	0.386804	0.319872	0.348327	0.463137	0.424543	0.293369	0.229758	0.391035	0.376833	0.634167	0.646871	0.339171	0.159194	0.227497	0.447183	0.465764	0.316336	0.255881	0.576037	0.560449	0.508129	0.536109	0.636566	0.399429	0.433238	0.554923	0.418557	1.65692	1.70911	0.585673	0.711735	0.182221				0.833933	0.558669	0.578806	0.342693	0.649877	0.867389	0.655437	0.748531	0.8109	0.716178	0.421888
431	0.603237	0.382031	0.524454	0.408825	0.33119	0.366672	0.493009	0.459052	0.329632	0.272162	0.435467	0.423887	0.664621	0.678675	0.3813	0.214466	0.272311	0.481351	0.517109	0.356659	0.31919	0.645033	0.637148	0.526447	0.58748	0.689128	0.448683	0.475218	0.597289	0.461701	1.75059	1.79562	0.647684	0.768654	0.13386				0.907141	0.650973	0.670633	0.426409	0.728349	0.943889	0.727925	0.775042	0.89231	0.798818	0.493618
432	0.567866	0.312916	0.444865	0.341002	0.234259	0.25539	0.39809	0.378261	0.227474	0.163721	0.341363	0.330256	0.526843	0.542334	0.271138	0.0887249	0.111281	0.348449	0.395083	0.19863	0.173011	0.526415	0.498754	0.337946	0.436199	0.559793	0.291574	0.298033	0.446316	0.339799	1.6157	1.63056	0.500072	0.606443	0.276079				0.781505	0.542685	0.576072	0.308073	0.614122	0.852044	0.616345	0.664183	0.799289	0.714154	0.387433
433	1.03352	0.834013	0.938814	0.793358	0.699324	0.747738	0.837153	0.78918	0.669156	0.611658	0.741126	0.713389	0.964876	0.955805	0.619353	0.407094	0.455751	0.683067	0.64528	0.472652	0.4469	0.741393	0.633999	0.545186	0.634994	0.690168	0.38677	0.436322	0.556689	0.414093	1.67747	1.68664	0.513397	0.582236	0.214532				0.641691	0.345818	0.443292	0.196694	0.439234	0.678232	0.491208	0.582105	0.616328	0.546083	0.283352
434	0.941829	0.693894	0.795267	0.701401	0.595678	0.601827	0.724172	0.706334	0.536254	0.469388	0.657644	0.637966	0.844478	0.853281	0.567928	0.335121	0.355292	0.622188	0.623615	0.411657	0.374829	0.723145	0.637167	0.496392	0.599204	0.702141	0.389327	0.405986	0.556048	0.436391	1.68499	1.69131	0.547	0.614414	0.229873				0.722278	0.479781	0.565237	0.289489	0.559144	0.82145	0.607925	0.660954	0.772474	0.712019	0.408519
435	0.639521	0.428356	0.532817	0.400646	0.296461	0.349055	0.452618	0.416385	0.295397	0.250178	0.394198	0.376045	0.613915	0.614344	0.303144	0.112684	0.156815	0.38284	0.378954	0.206566	0.209662	0.52199	0.443501	0.295245	0.422518	0.499482	0.214799	0.249186	0.371594	0.261784	1.5953	1.57758	0.393458	0.480267	0.317768				0.638561	0.374753	0.446813	0.178911	0.426932	0.648588	0.421989	0.455004	0.572396	0.48321	0.177364
436	0.584174	0.337312	0.423	0.307446	0.17494	0.20474	0.3198	0.29892	0.149242	0.0954161	0.25785	0.237717	0.43191	0.4346	0.150494	0.069076	0.0583821	0.20634	0.20173	0.00643317	0.00152806	0.340863	0.229945	0.0546681	0.211546	0.311103	0.00584994	0.0121288	0.163801	0.0866808	1.37741	1.33065	0.181204	0.251521	0.51454				0.446858	0.198276	0.287832	0.00689995	0.243119	0.492757	0.244093	0.29134	0.407349	0.331014	0.00314325
437	0.895628	0.652211	0.722902	0.62201	0.489401	0.50919	0.617807	0.60122	0.434957	0.382895	0.560999	0.53601	0.736894	0.741669	0.454027	0.19818	0.209126	0.502015	0.468231	0.251469	0.245404	0.584739	0.437833	0.289725	0.439744	0.529263	0.185795	0.209411	0.363739	0.277482	1.5305	1.48279	0.334339	0.37953	0.364251				0.515771	0.259949	0.386282	0.0919294	0.319127	0.584953	0.357435	0.421773	0.505182	0.445462	0.140859
444	0.906654	0.654925	0.711044	0.595813	0.420501	0.460538	0.57024	0.56464	0.422824	0.375155	0.51782	0.498916	0.640138	0.634247	0.372098	0.119141	0.0839785	0.397237	0.333341	0.108427	0.139603	0.459169	0.228159	0.0841649	0.287453	0.369665	0.00358161	0.0211277	0.191213	0.167993	1.32553	1.21382	0.132816	0.159569	0.430237				0.337927	0.0444034	0.205601	0.0925054	0.101635	0.371715	0.127601	0.277183	0.246161	0.186152	0.111159
445	0.822619	0.533982	0.590599	0.507321	0.296181	0.316874	0.456046	0.46297	0.271538	0.233912	0.419752	0.386359	0.492862	0.519952	0.291022	0.023295	0.0640486	0.325538	0.244763	0.00917267	0.0186019	0.374574	0.108799	0.0106163	0.214336	0.330422	0.0597514	0.0407477	0.166524	0.170639	1.2144	1.10943	0.110813	0.133081	0.43636				0.333082	0.0506803	0.214115	0.097402	0.106294	0.399244	0.144925	0.331315	0.258491	0.21552	0.0936411
446	0.418129	0.146023	0.176479	0.103111	0.102039	0.0711784	0.054011	0.0667227	0.113717	0.12786	0.0743069	0.0518362	0.203149	0.240774	0.0239239	0.281839	0.294308	0.118815	0.0423177	0.167555	0.148562	0.212966	0.0261008	0.0837018	0.1027	0.243911	0.11084	0.102714	0.100653	0.15261	1.19652	1.05622	0.0852826	0.135266	0.415782				0.415949	0.142722	0.288381	0.0359927	0.177862	0.453081	0.157043	0.353917	0.290182	0.215566	0.125788
447	0.403369	0.176344	0.23028	0.152185	0.0339698	0.0438777	0.173649	0.193254	0.0666011	0.0768785	0.266206	0.269073	0.437073	0.473177	0.267816	0.0193616	0.00732904	0.393865	0.342223	0.155947	0.203905	0.555596	0.331842	0.226964	0.447509	0.58432	0.24054	0.243435	0.434395	0.509823	1.61184	1.43617	0.438489	0.486702	0.0244321				0.793543	0.519485	0.679459	0.351097	0.539597	0.799258	0.493202	0.665879	0.626546	0.534608	0.189317
448	0.550245	0.307622	0.358875	0.281523	0.0691729	0.142272	0.278496	0.298841	0.164705	0.173905	0.353195	0.346065	0.462997	0.501874	0.317672	0.0581286	0.0160642	0.411385	0.344358	0.135594	0.201133	0.547559	0.276238	0.157435	0.40764	0.538907	0.168304	0.17005	0.373734	0.461468	1.49233	1.30901	0.350452	0.373093	0.0797909				0.6615	0.384327	0.570563	0.241695	0.408831	0.683317	0.38869	0.580627	0.503721	0.433422	0.102816
449	0.483636	0.23961	0.257985	0.19512	0.0221025	0.0369972	0.158023	0.188218	0.0422741	0.0520741	0.243186	0.236224	0.358385	0.400583	0.226402	0.0636947	0.0998946	0.329442	0.233904	0.0412881	0.0813541	0.421448	0.133643	0.0877064	0.304595	0.441347	0.0806033	0.0834929	0.288469	0.391779	1.34461	1.15849	0.252731	0.282822	0.14543				0.57763	0.294708	0.476369	0.152118	0.323036	0.592573	0.293766	0.527164	0.402297	0.32711	0.00343762
450	0.290322	0.0882827	0.090539	0.0258587	0.152522	0.0775881	0.0205163	0.0618335	0.0443218	0.0304566	0.154936	0.17644	0.343232	0.371342	0.193706	0.0564897	0.0777712	0.331577	0.255782	0.100622	0.134192	0.466063	0.216661	0.168742	0.374903	0.515973	0.18606	0.181672	0.367708	0.493999	1.5046	1.28775	0.360486	0.412043	0.0125994				0.757339	0.478126	0.647245	0.318365	0.491358	0.737334	0.412115	0.634835	0.539933	0.432525	0.0913231
451	0.643474	0.407665	0.44933	0.407362	0.177505	0.257098	0.404469	0.441157	0.296006	0.332479	0.53957	0.528682	0.624826	0.683804	0.538295	0.254566	0.202306	0.633461	0.549591	0.328415	0.413839	0.766298	0.45445	0.320036	0.608751	0.741944	0.345691	0.343396	0.561704	0.677532	1.65052	1.43908	0.523285	0.509421	0.142752				0.802026	0.543744	0.780032	0.42801	0.545277	0.834928	0.541639	0.712798	0.635228	0.588574	0.267485
452	0.657726	0.382936	0.399881	0.364332	0.0907879	0.139472	0.283873	0.31371	0.131926	0.158866	0.358234	0.315568	0.352247	0.41484	0.284811	0.042599	0.120323	0.329469	0.202525	0.040604	0.051672	0.391308	0.0172046	0.0915704	0.209431	0.33293	0.0874262	0.0832116	0.150285	0.273099	1.14017	0.933702	0.0825451	0.0479413	0.261634				0.333788	0.0754094	0.325948	0.02924	0.0746128	0.378195	0.0921003	0.290443	0.159112	0.138205	0.169905
[truncated: 241 more columns]

## Sheet: 2fec (E203Q)-1ots (WT)
Res. #	35	36	37	38	39	40	41	42	43	44	45	46	47	48	49	50	51	52	53	54	55	56	57	58	59	60	61	62	63	64	65	66	67	68	69				75	76	77	78	79	80	81	82	83	84	85
35	0	0.0203415	0.0528058	0.0629309	0.00787556	0.0254146	0.0459479	0.0229142	0.388055	0.264917	0.421378	0.310195	0.396251	0.471994	0.531192	0.233963	0.19183	0.291214	0.365873	0.218681	0.324174	0.406599	0.383859	0.497995	0.656582	0.684472	0.56957	0.675381	0.503838	0.639965	0.602825	0.457944	0.72225	0.649633	0.20212				1.12601	0.53623	0.767371	0.552153	0.566689	0.69079	0.70258	0.608294	0.687013	0.716126	0.74335
36	0.0203415	0	0.0281879	0.0583986	0.0975501	0.159505	0.163233	0.124113	0.287014	0.105448	0.219296	0.164873	0.265118	0.308255	0.36456	0.0991275	0.0445436	0.123711	0.208987	0.0600693	0.151238	0.223368	0.238656	0.356829	0.483536	0.510201	0.394665	0.504072	0.335805	0.470855	0.431944	0.296932	0.547381	0.48444	0.00920767				0.970495	0.377809	0.591739	0.3844	0.417305	0.547219	0.550469	0.465039	0.550438	0.563016	0.584254
37	0.0528058	0.0281879	0	0.0174053	0.109439	0.122391	0.00716214	0.0579622	0.407207	0.220517	0.324619	0.285177	0.412915	0.445442	0.46884	0.24534	0.196261	0.244695	0.323076	0.192499	0.288994	0.327722	0.353163	0.504236	0.622318	0.642774	0.534367	0.643837	0.471083	0.607153	0.55502	0.410897	0.66431	0.611265	0.145723				1.12825	0.538062	0.737224	0.511517	0.538769	0.676629	0.678147	0.594239	0.661834	0.660672	0.687234
38	0.0629309	0.0583986	0.0174053	0	0.0148849	0.0937388	0.0282312	0.00727964	0.287472	0.201926	0.351143	0.231867	0.340071	0.420344	0.449276	0.178909	0.145278	0.224134	0.286147	0.151934	0.268261	0.321416	0.303444	0.447326	0.601325	0.621068	0.509475	0.619526	0.445281	0.578964	0.529844	0.382435	0.646904	0.580459	0.142218				1.08414	0.496507	0.711947	0.480279	0.490161	0.626708	0.636542	0.542026	0.605991	0.623356	0.654846
39	0.00787556	0.0975501	0.109439	0.0148849	0	0.00389447	0.0543851	0.0298959	0.38821	0.271599	0.367117	0.284425	0.38615	0.448169	0.498735	0.212965	0.173515	0.262105	0.331127	0.187045	0.293191	0.363026	0.353918	0.476124	0.619541	0.637447	0.523647	0.640172	0.465276	0.594853	0.562998	0.429836	0.679055	0.609851	0.154496				1.08616	0.488876	0.707898	0.500598	0.519203	0.648555	0.658809	0.569223	0.643262	0.661253	0.690749
40	0.0254146	0.159505	0.122391	0.0937388	0.00389447	0	0.00472987	0.067659	0.301006	0.248574	0.336969	0.247687	0.356467	0.451971	0.475648	0.195268	0.158594	0.254259	0.30444	0.133437	0.260314	0.322357	0.32289	0.458807	0.601369	0.616646	0.477108	0.605847	0.4576	0.572612	0.509831	0.39946	0.649394	0.573286	0.104365				1.06357	0.475975	0.687589	0.461222	0.47916	0.638991	0.651316	0.549937	0.619512	0.639596	0.66922
41	0.0459479	0.163233	0.00716214	0.0282312	0.0543851	0.00472987	0	0.0277409	0.0226656	0.0450865	0.267085	0.111547	0.206899	0.359397	0.378052	0.0968029	0.0689898	0.175207	0.216506	0.0530511	0.197813	0.252847	0.230574	0.382292	0.549707	0.569706	0.432129	0.553448	0.406604	0.526876	0.448034	0.322968	0.592927	0.51518	0.0723379				1.03167	0.456126	0.666206	0.413961	0.419046	0.588608	0.601066	0.490639	0.551292	0.57643	0.607389
42	0.0229142	0.124113	0.0579622	0.00727964	0.0298959	0.067659	0.0277409	0	0.0329028	0.253613	0.433445	0.225776	0.31458	0.457157	0.495878	0.171446	0.15813	0.26854	0.305486	0.158856	0.298826	0.361213	0.314226	0.452963	0.627734	0.638992	0.517848	0.640741	0.469268	0.591547	0.546872	0.414955	0.674294	0.595405	0.167423				1.0811	0.489705	0.710599	0.482987	0.482183	0.626311	0.643457	0.541009	0.599733	0.627086	0.664499
43	0.388055	0.287014	0.407207	0.287472	0.38821	0.301006	0.0226656	0.0329028	0	0.0171048	0.103128	0.133248	0.0142028	0.0157932	0.0567183	0.187933	0.237234	0.168918	0.0932731	0.226357	0.131587	0.0783076	0.0570004	0.0738786	0.189141	0.203593	0.102509	0.220436	0.0372934	0.170737	0.144192	0.0124413	0.249448	0.192302	0.272688				0.690731	0.0941842	0.287539	0.0841183	0.119815	0.255376	0.251935	0.173181	0.255107	0.254063	0.274127
44	0.264917	0.105448	0.220517	0.201926	0.271599	0.248574	0.0450865	0.253613	0.0171048	0	0.00398411	0.138098	0.222644	0.224169	0.263527	0.0970497	0.00392529	0.0411936	0.135702	0.0106568	0.0737128	0.1109	0.16104	0.305849	0.407264	0.434817	0.324522	0.429017	0.263143	0.40323	0.336713	0.198627	0.451686	0.400442	0.0756162				0.939093	0.36193	0.537934	0.305948	0.344541	0.507286	0.498904	0.41575	0.491117	0.481929	0.500448
45	0.421378	0.219296	0.324619	0.351143	0.367117	0.336969	0.267085	0.433445	0.103128	0.00398411	0	0.010556	0.035686	0.0259863	0.118722	0.0909723	0.195632	0.122832	0.0264545	0.169399	0.073177	0.0218644	0.0175181	0.119614	0.262825	0.302714	0.194476	0.283584	0.115094	0.265542	0.191013	0.0335854	0.311768	0.251311	0.193238				0.800623	0.236736	0.422045	0.170757	0.19696	0.364773	0.35736	0.263439	0.342461	0.35007	0.367279
46	0.310195	0.164873	0.285177	0.231867	0.284425	0.247687	0.111547	0.225776	0.133248	0.138098	0.010556	0	0.0470141	0.119274	0.209737	0.0581192	0.0983948	0.0198506	0.0473434	0.0703585	0.032809	0.0862289	0.07005	0.199073	0.340547	0.357332	0.266008	0.374974	0.18022	0.321053	0.295997	0.14971	0.398963	0.337057	0.100331				0.840778	0.248724	0.444413	0.231584	0.253166	0.391189	0.390245	0.306595	0.380752	0.386004	0.41114
47	0.396251	0.265118	0.412915	0.340071	0.38615	0.356467	0.206899	0.31458	0.0142028	0.222644	0.035686	0.0470141	0	0.0273778	0.068221	0.126662	0.22046	0.128477	0.0690858	0.229004	0.121101	0.0708166	0.0408421	0.0917892	0.201194	0.211422	0.101174	0.22906	0.0559002	0.181344	0.142914	0.0280565	0.259769	0.198639	0.270171				0.706152	0.115695	0.295801	0.0857369	0.121874	0.279768	0.275052	0.191961	0.27098	0.26734	0.28672
48	0.471994	0.308255	0.445442	0.420344	0.448169	0.451971	0.359397	0.457157	0.0157932	0.224169	0.0259863	0.119274	0.0273778	0	0.0131137	0.0288533	0.210022	0.184931	0.100247	0.248543	0.157323	0.139022	0.0955632	0.0621941	0.175366	0.195964	0.0834512	0.193908	0.0305301	0.164551	0.0864647	0.045279	0.210704	0.153696	0.303071				0.705995	0.138488	0.303686	0.0578312	0.0903891	0.272869	0.263685	0.173948	0.245162	0.237983	0.255528
49	0.531192	0.36456	0.46884	0.449276	0.498735	0.475648	0.378052	0.495878	0.0567183	0.263527	0.118722	0.209737	0.068221	0.0131137	0	0.00455541	0.164227	0.222233	0.136156	0.19965	0.130697	0.127409	0.126221	0.0258523	0.155631	0.179258	0.105059	0.194484	0.0101419	0.146478	0.101828	0.0655866	0.196828	0.145533	0.279634				0.694072	0.12037	0.291072	0.0550892	0.0829	0.239422	0.226053	0.146036	0.220653	0.212435	0.230301
50	0.233963	0.0991275	0.24534	0.178909	0.212965	0.195268	0.0968029	0.171446	0.187933	0.0970497	0.0909723	0.0581192	0.126662	0.0288533	0.00455541	0	0.00677414	0.0835541	0.10446	0.00518473	0.11807	0.157459	0.135205	0.264331	0.397126	0.393666	0.304706	0.438025	0.23769	0.363295	0.35415	0.233234	0.458927	0.392363	0.0448014				0.880427	0.278398	0.465104	0.265808	0.283443	0.430077	0.432073	0.348535	0.412561	0.412356	0.441997
51	0.19183	0.0445436	0.196261	0.145278	0.173515	0.158594	0.0689898	0.15813	0.237234	0.00392529	0.195632	0.0983948	0.22046	0.210022	0.164227	0.00677414	0	0.0419152	0.0349834	0.086457	0.0842815	0.0808549	0.12648	0.304614	0.406816	0.391851	0.284183	0.439288	0.266657	0.377937	0.332915	0.238151	0.45913	0.397206	0.0613356				0.915516	0.326678	0.489785	0.271156	0.294454	0.472291	0.470214	0.381311	0.434139	0.42136	0.445732
52	0.291214	0.123711	0.244695	0.224134	0.262105	0.254259	0.175207	0.26854	0.168918	0.0411936	0.122832	0.0198506	0.128477	0.184931	0.222233	0.0835541	0.0419152	0	0.0100754	0.0312311	0.0882654	0.0442977	0.0579472	0.242424	0.387841	0.395795	0.3002	0.411759	0.228771	0.367896	0.293906	0.152035	0.412861	0.355843	0.0691608				0.917328	0.351684	0.507067	0.255785	0.272379	0.459815	0.451803	0.360038	0.40976	0.396908	0.420639
53	0.365873	0.208987	0.323076	0.286147	0.331127	0.30444	0.216506	0.305486	0.0932731	0.135702	0.0264545	0.0473434	0.0690858	0.100247	0.136156	0.10446	0.0349834	0.0100754	0	0.0394531	0.0569292	0.0722674	0.0111906	0.133028	0.280735	0.309858	0.258612	0.345326	0.121258	0.283779	0.265159	0.102127	0.353932	0.297731	0.11236				0.831156	0.249594	0.415745	0.195913	0.217142	0.373944	0.361163	0.282999	0.352332	0.34263	0.364423
54	0.218681	0.0600693	0.192499	0.151934	0.187045	0.133437	0.0530511	0.158856	0.226357	0.0106568	0.169399	0.0703585	0.229004	0.248543	0.19965	0.00518473	0.086457	0.0312311	0.0394531	0	0.00173417	0.125721	0.227442	0.263677	0.331136	0.382589	0.321623	0.425588	0.233383	0.389005	0.372439	0.250616	0.477861	0.421989	0.0483441				0.93887	0.354152	0.510022	0.313711	0.357506	0.527699	0.510906	0.438164	0.52054	0.502663	0.514692
55	0.324174	0.151238	0.288994	0.268261	0.293191	0.260314	0.197813	0.298826	0.131587	0.0737128	0.073177	0.032809	0.121101	0.157323	0.130697	0.11807	0.0842815	0.0882654	0.0569292	0.00173417	0	0.0238844	0.0978898	0.220244	0.329048	0.339982	0.22365	0.353546	0.202913	0.330099	0.239398	0.141381	0.386904	0.31951	0.145486				0.874801	0.319179	0.457985	0.216898	0.251164	0.468576	0.456472	0.363126	0.42658	0.414104	0.427273
56	0.406599	0.223368	0.327722	0.321416	0.363026	0.322357	0.252847	0.361213	0.0783076	0.1109	0.0218644	0.0862289	0.0708166	0.139022	0.127409	0.157459	0.0808549	0.0442977	0.0722674	0.125721	0.0238844	0	0.0376506	0.0734751	0.218801	0.350623	0.28444	0.305604	0.108131	0.315058	0.222684	0.0345119	0.330487	0.281516	0.140789				0.880307	0.34289	0.474402	0.217116	0.255009	0.461742	0.434652	0.353899	0.430359	0.412023	0.422066
57	0.383859	0.238656	0.353163	0.303444	0.353918	0.32289	0.230574	0.314226	0.0570004	0.16104	0.0175181	0.07005	0.0408421	0.0955632	0.126221	0.135205	0.12648	0.0579472	0.0111906	0.227442	0.0978898	0.0376506	0	0.0348246	0.108192	0.154223	0.253288	0.312296	0.0275347	0.215083	0.26308	0.0939932	0.308185	0.270628	0.128422				0.804795	0.210074	0.34441	0.154472	0.187736	0.338003	0.309017	0.255924	0.321833	0.279075	0.288869
58	0.497995	0.356829	0.504236	0.447326	0.476124	0.458807	0.382292	0.452963	0.0738786	0.305849	0.119614	0.199073	0.0917892	0.0621941	0.0258523	0.264331	0.304614	0.242424	0.133028	0.263677	0.220244	0.0734751	0.0348246	0	0.018221	0.0410769	0.0951412	0.155685	0.0501996	0.0305538	0.0392268	4.34262e-05	0.163478	0.0919616	0.339053				0.606838	0.0191811	0.143888	0.0544906	0.0211405	0.180668	0.164985	0.0850417	0.146664	0.1237	0.129796
59	0.656582	0.483536	0.622318	0.601325	0.619541	0.601369	0.549707	0.627734	0.189141	0.407264	0.262825	0.340547	0.201194	0.175366	0.155631	0.397126	0.406816	0.387841	0.280735	0.331136	0.329048	0.218801	0.108192	0.018221	0	0.0300091	0.0598015	0.0181587	0.122173	0.00907716	0.130357	0.225641	0.0402869	0.0374573	0.458327				0.561349	0.0409253	0.146775	0.121018	0.077841	0.18193	0.161339	0.0675245	0.141344	0.131349	0.135059
60	0.684472	0.510201	0.642774	0.621068	0.637447	0.616646	0.569706	0.638992	0.203593	0.434817	0.302714	0.357332	0.211422	0.195964	0.179258	0.393666	0.391851	0.395795	0.309858	0.382589	0.339982	0.350623	0.154223	0.0410769	0.0300091	0	0.0238423	0.0535724	0.17983	0.0355048	0.0932386	0.21511	0.0450978	0.0561964	0.381863				0.522526	0.00794448	0.118105	0.146177	0.127811	0.119732	0.0997809	0.00557808	0.0799126	0.0945313	0.103541
61	0.56957	0.394665	0.534367	0.509475	0.523647	0.477108	0.432129	0.517848	0.102509	0.324522	0.194476	0.266008	0.101174	0.0834512	0.105059	0.304706	0.284183	0.3002	0.258612	0.321623	0.22365	0.28444	0.253288	0.0951412	0.0598015	0.0238423	0	0.0317	0.0168107	0.108977	0.0490168	0.010033	0.227637	0.0986739	0.323061				0.62311	0.0862352	0.215862	0.000809386	0.0511809	0.316924	0.301799	0.211849	0.328352	0.347296	0.358249
62	0.675381	0.504072	0.643837	0.619526	0.640172	0.605847	0.553448	0.640741	0.220436	0.429017	0.283584	0.374974	0.22906	0.193908	0.194484	0.438025	0.439288	0.411759	0.345326	0.425588	0.353546	0.305604	0.312296	0.155685	0.0181587	0.0535724	0.0317	0	0.0185068	0.0619847	0.141818	0.126602	0.0810733	0.0202139	0.496099				0.566649	0.0654432	0.136596	0.103562	0.0262788	0.264652	0.241635	0.171498	0.250184	0.231465	0.229119
63	0.503838	0.335805	0.471083	0.445281	0.465276	0.4576	0.406604	0.469268	0.0372934	0.263143	0.115094	0.18022	0.0559002	0.0305301	0.0101419	0.23769	0.266657	0.228771	0.121258	0.233383	0.202913	0.108131	0.0275347	0.0501996	0.122173	0.17983	0.0168107	0.0185068	0	0.0484725	0.0591443	0.106066	0.155796	0.0623986	0.201559				0.692489	0.191105	0.259875	0.0314146	0.032716	0.25025	0.228253	0.111128	0.117506	0.0923269	0.0590395
64	0.639965	0.470855	0.607153	0.578964	0.594853	0.572612	0.526876	0.591547	0.170737	0.40323	0.265542	0.321053	0.181344	0.164551	0.146478	0.363295	0.377937	0.367896	0.283779	0.389005	0.330099	0.315058	0.215083	0.0305538	0.00907716	0.0355048	0.108977	0.0619847	0.0484725	0	0.0149522	0.00445293	0.168833	0.00995959	0.217				0.560488	0.0438931	0.13428	0.123354	0.113215	0.187647	0.174244	0.0604344	0.122685	0.143367	0.13751
65	0.602825	0.431944	0.55502	0.529844	0.562998	0.509831	0.448034	0.546872	0.144192	0.336713	0.191013	0.295997	0.142914	0.0864647	0.101828	0.35415	0.332915	0.293906	0.265159	0.372439	0.239398	0.222684	0.26308	0.0392268	0.130357	0.0932386	0.0490168	0.141818	0.0591443	0.0149522	0	0.0274892	0.101324	0.078225	0.41124				0.697248	0.202476	0.202904	0.0236881	0.153761	0.428666	0.365163	0.377892	0.423106	0.345708	0.283997
66	0.457944	0.296932	0.410897	0.382435	0.429836	0.39946	0.322968	0.414955	0.0124413	0.198627	0.0335854	0.14971	0.0280565	0.045279	0.0655866	0.233234	0.238151	0.152035	0.102127	0.250616	0.141381	0.0345119	0.0939932	4.34262e-05	0.225641	0.21511	0.010033	0.126602	0.106066	0.00445293	0.0274892	0	0.0474071	0.210864	0.13546				0.88516	0.402081	0.339589	0.123464	0.189979	0.433372	0.34778	0.32907	0.29706	0.170931	0.0778486
67	0.72225	0.547381	0.66431	0.646904	0.679055	0.649394	0.592927	0.674294	0.249448	0.451686	0.311768	0.398963	0.259769	0.210704	0.196828	0.458927	0.45913	0.412861	0.353932	0.477861	0.386904	0.330487	0.308185	0.163478	0.0402869	0.0450978	0.227637	0.0810733	0.155796	0.168833	0.101324	0.0474071	0	0.02245	0.0506702				0.685187	0.28966	0.248164	0.0100376	0.0608243	0.377128	0.34336	0.308509	0.284472	0.220181	0.169001
68	0.649633	0.48444	0.611265	0.580459	0.609851	0.573286	0.51518	0.595405	0.192302	0.400442	0.251311	0.337057	0.198639	0.153696	0.145533	0.392363	0.397206	0.355843	0.297731	0.421989	0.31951	0.281516	0.270628	0.0919616	0.0374573	0.0561964	0.0986739	0.0202139	0.0623986	0.00995959	0.078225	0.210864	0.02245	0	0.00255372				0.654921	0.195031	0.103428	0.063594	0.0515417	0.350981	0.2696	0.275572	0.263831	0.196877	0.113353
69	0.20212	0.00920767	0.145723	0.142218	0.154496	0.104365	0.0723379	0.167423	0.272688	0.0756162	0.193238	0.100331	0.270171	0.303071	0.279634	0.0448014	0.0613356	0.0691608	0.11236	0.0483441	0.145486	0.140789	0.128422	0.339053	0.458327	0.381863	0.323061	0.496099	0.201559	0.217	0.41124	0.13546	0.0506702	0.00255372	0				1.01587	0.676137	0.580167	0.297622	0.285388	0.642702	0.504664	0.311708	0.334521	0.314414	0.119937
75	1.12601	0.970495	1.12825	1.08414	1.08616	1.06357	1.03167	1.0811	0.690731	0.939093	0.800623	0.840778	0.706152	0.705995	0.694072	0.880427	0.915516	0.917328	0.831156	0.93887	0.874801	0.880307	0.804795	0.606838	0.561349	0.522526	0.62311	0.566649	0.692489	0.560488	0.697248	0.88516	0.685187	0.654921	1.01587				0	0.0335879	0.0392316	0.627653	0.392941	0.518419	0.557009	0.583395	0.501219	0.553455	0.552636
76	0.53623	0.377809	0.538062	0.496507	0.488876	0.475975	0.456126	0.489705	0.0941842	0.36193	0.236736	0.248724	0.115695	0.138488	0.12037	0.278398	0.326678	0.351684	0.249594	0.354152	0.319179	0.34289	0.210074	0.0191811	0.0409253	0.00794448	0.0862352	0.0654432	0.191105	0.0438931	0.202476	0.402081	0.28966	0.195031	0.676137				0.0335879	0	0.0335875	0.252711	0.160854	0.0661244	0.0746504	0.0296773	0.0756	0.104514	0.04801
77	0.767371	0.591739	0.737224	0.711947	0.707898	0.687589	0.666206	0.710599	0.287539	0.537934	0.422045	0.444413	0.295801	0.303686	0.291072	0.465104	0.489785	0.507067	0.415745	0.510022	0.457985	0.474402	0.34441	0.143888	0.146775	0.118105	0.215862	0.136596	0.259875	0.13428	0.202904	0.339589	0.248164	0.103428	0.580167				0.0392316	0.0335875	0	0.0307633	0.234411	0.165	0.157641	0.0607168	0.0452766	0.206535	0.151942
78	0.552153	0.3844	0.511517	0.480279	0.500598	0.461222	0.413961	0.482987	0.0841183	0.305948	0.170757	0.231584	0.0857369	0.0578312	0.0550892	0.265808	0.271156	0.255785	0.195913	0.313711	0.216898	0.217116	0.154472	0.0544906	0.121018	0.146177	0.000809386	0.103562	0.0314146	0.123354	0.0236881	0.123464	0.0100376	0.063594	0.297622				0.627653	0.252711	0.0307633	0	0.0103091	0.339973	0.0784256	0.0508143	0.124774	0.134495	0.00715288
79	0.566689	0.417305	0.538769	0.490161	0.519203	0.47916	0.419046	0.482183	0.119815	0.344541	0.19696	0.253166	0.121874	0.0903891	0.0829	0.283443	0.294454	0.272379	0.217142	0.357506	0.251164	0.255009	0.187736	0.0211405	0.077841	0.127811	0.0511809	0.0262788	0.032716	0.113215	0.153761	0.189979	0.0608243	0.0515417	0.285388				0.392941	0.160854	0.234411	0.0103091	0	0.0317795	0.148531	0.0700467	0.041386	0.0456202	0.0583088
80	0.69079	0.547219	0.676629	0.626708	0.648555	0.638991	0.588608	0.626311	0.255376	0.507286	0.364773	0.391189	0.279768	0.272869	0.239422	0.430077	0.472291	0.459815	0.373944	0.527699	0.468576	0.461742	0.338003	0.180668	0.18193	0.119732	0.316924	0.264652	0.25025	0.187647	0.428666	0.433372	0.377128	0.350981	0.642702				0.518419	0.0661244	0.165	0.339973	0.0317795	0	0.0318317	0.0835348	0.062401	0.0378402	0.0506109
81	0.70258	0.550469	0.678147	0.636542	0.658809	0.651316	0.601066	0.643457	0.251935	0.498904	0.35736	0.390245	0.275052	0.263685	0.226053	0.432073	0.470214	0.451803	0.361163	0.510906	0.456472	0.434652	0.309017	0.164985	0.161339	0.0997809	0.301799	0.241635	0.228253	0.174244	0.365163	0.34778	0.34336	0.2696	0.504664				0.557009	0.0746504	0.157641	0.0784256	0.148531	0.0318317	0	0.0160296	0.103353	0.0611288	0.0250583
82	0.608294	0.465039	0.594239	0.542026	0.569223	0.549937	0.490639	0.541009	0.173181	0.41575	0.263439	0.306595	0.191961	0.173948	0.146036	0.348535	0.381311	0.360038	0.282999	0.438164	0.363126	0.353899	0.255924	0.0850417	0.0675245	0.00557808	0.211849	0.171498	0.111128	0.0604344	0.377892	0.32907	0.308509	0.275572	0.311708				0.583395	0.0296773	0.0607168	0.0508143	0.0700467	0.0835348	0.0160296	0	0.00785945	0.0359608	0.00191831
83	0.687013	0.550438	0.661834	0.605991	0.643262	0.619512	0.551292	0.599733	0.255107	0.491117	0.342461	0.380752	0.27098	0.245162	0.220653	0.412561	0.434139	0.40976	0.352332	0.52054	0.42658	0.430359	0.321833	0.146664	0.141344	0.0799126	0.328352	0.250184	0.117506	0.122685	0.423106	0.29706	0.284472	0.263831	0.334521				0.501219	0.0756	0.0452766	0.124774	0.041386	0.062401	0.103353	0.00785945	0	0.0231461	0.0306611
84	0.716126	0.563016	0.660672	0.623356	0.661253	0.639596	0.57643	0.627086	0.254063	0.481929	0.35007	0.386004	0.26734	0.237983	0.212435	0.412356	0.42136	0.396908	0.34263	0.502663	0.414104	0.412023	0.279075	0.1237	0.131349	0.0945313	0.347296	0.231465	0.0923269	0.143367	0.345708	0.170931	0.220181	0.196877	0.314414				0.553455	0.104514	0.206535	0.134495	0.0456202	0.0378402	0.0611288	0.0359608	0.0231461	0	0.00180106
85	0.74335	0.584254	0.687234	0.654846	0.690749	0.66922	0.607389	0.664499	0.274127	0.500448	0.367279	0.41114	0.28672	0.255528	0.230301	0.441997	0.445732	0.420639	0.364423	0.514692	0.427273	0.422066	0.288869	0.129796	0.135059	0.103541	0.358249	0.229119	0.0590395	0.13751	0.283997	0.0778486	0.169001	0.113353	0.119937				0.552636	0.04801	0.151942	0.00715288	0.0583088	0.0506109	0.0250583	0.00191831	0.0306611	0.00180106	0
86	0.777614	0.634272	0.73978	0.690851	0.729945	0.703471	0.633303	0.687393	0.331958	0.563149	0.42088	0.460275	0.3434	0.314159	0.294129	0.483634	0.485879	0.46431	0.420351	0.57662	0.470295	0.488379	0.359451	0.168111	0.187634	0.136087	0.387002	0.277169	0.0465771	0.0964331	0.327938	0.130565	0.1914	0.12113	0.0501961				0.448479	0.141314	0.00946564	0.0635769	0.116056	0.0914537	0.12324	0.12114	0.0757031	0.0606522	0.00740055
87	0.830393	0.680908	0.781543	0.740181	0.768738	0.745829	0.689535	0.729825	0.372006	0.609515	0.491805	0.502147	0.379903	0.368948	0.35298	0.500038	0.50055	0.504026	0.455836	0.585531	0.500912	0.542746	0.356703	0.177128	0.247944	0.213778	0.403708	0.3085	0.115429	0.160897	0.344809	0.161435	0.241407	0.153373	0.166709				0.393348	0.136704	0.0566238	0.000259847	0.104718	0.146876	0.122392	0.11301	0.152138	0.0371509	0.0920693
88	0.675878	0.528771	0.632594	0.595867	0.623683	0.631332	0.581305	0.604613	0.231789	0.486449	0.371524	0.365759	0.269874	0.276453	0.23	0.390747	0.426099	0.429702	0.349255	0.499497	0.473681	0.491734	0.265512	0.180962	0.302216	0.285957	0.472535	0.409696	0.240217	0.326097	0.438032	0.24645	0.403474	0.317492	0.349712				0.658229	0.169967	0.363164	0.203159	0.0658484	0.096296	0.125782	0.0779826	0.00633955	0.0621913	0.194051
89	0.760863	0.594364	0.698049	0.672525	0.691888	0.675435	0.62956	0.670251	0.272516	0.513661	0.410139	0.410432	0.278239	0.277795	0.256117	0.395737	0.388121	0.405144	0.341331	0.438024	0.380467	0.426815	0.163002	0.0315417	0.159399	0.133625	0.265979	0.204009	0.0245753	0.0550539	0.155719	0.043592	0.131776	0.0344359	0.0473053				0.448789	0.0770411	0.108727	0.083914	0.161032	0.0754184	0.0832459	0.157283	0.139172	0.0808508	0.0323782
90	0.681642	0.550172	0.637917	0.585022	0.631908	0.615378	0.540188	0.578706	0.258084	0.492827	0.365153	0.377375	0.284182	0.267093	0.240933	0.38849	0.393585	0.382589	0.35062	0.508024	0.425198	0.46266	0.276378	0.161525	0.25924	0.235621	0.438576	0.372816	0.103176	0.221095	0.408199	0.180599	0.319524	0.267351	0.162222				0.60504	0.0359204	0.227445	0.138922	0.0814143	0.0551564	0.0561946	0.053434	0.0708483	0.0882817	0.161494
91	0.930747	0.775372	0.821731	0.79187	0.847776	0.80403	0.721789	0.777245	0.440757	0.629372	0.524428	0.547018	0.421089	0.367999	0.359974	0.504199	0.451902	0.418741	0.415892	0.546104	0.41617	0.429273	0.24358	0.115121	0.165106	0.133157	0.343583	0.224695	0.0788281	0.0432548	0.218099	0.0649128	0.0530327	0.0339655	0.0116354				0.382547	0.121782	0.0283661	0.0568795	0.0903661	0.177096	0.205242	0.139883	0.124276	0.174949	0.102355
92	0.739701	0.566873	0.625608	0.612641	0.649335	0.621169	0.561163	0.605823	0.228871	0.433599	0.349969	0.347324	0.220285	0.194929	0.175911	0.301463	0.26345	0.253266	0.2227	0.330831	0.255646	0.271738	0.0354017	0.0251179	0.0893678	0.0854899	0.247359	0.165914	0.100091	0.0516337	0.149932	0.118143	0.0871557	0.0500968	0.0330641				0.509743	0.0295209	0.195962	0.0025939	0.0456319	0.0206635	0.0543899	0.0800146	0.0489722	0.0412731	0.0211831
93	0.739668	0.588881	0.658643	0.624901	0.664975	0.640627	0.572827	0.610792	0.273115	0.492154	0.39763	0.386996	0.276747	0.263286	0.246588	0.340271	0.31185	0.311995	0.285249	0.386908	0.317602	0.354232	0.104638	0.0498996	0.19008	0.169739	0.296621	0.260672	0.0229965	0.10936	0.234319	0.00475452	0.185422	0.127676	0.0158638				0.525236	0.0218153	0.1764	0.0260797	0.0239854	0.0138968	0.016249	0.0494341	0.0211158	0.00330399	0.0559649
94	0.658337	0.521614	0.578157	0.534226	0.578252	0.551966	0.47951	0.504536	0.216536	0.429669	0.339895	0.315193	0.223241	0.214173	0.20009	0.265495	0.251131	0.25591	0.236972	0.35466	0.293048	0.341154	0.119932	0.0592403	0.200696	0.188029	0.333231	0.295735	0.0272558	0.162407	0.320538	0.0827652	0.26319	0.21474	0.103019				0.565359	0.0362438	0.245546	0.135077	0.0814722	0.0364296	0.0368961	0.0173045	0.0496395	0.0900412	0.131448
95	0.603917	0.468022	0.51988	0.487926	0.532611	0.534481	0.47332	0.484061	0.188127	0.40967	0.338233	0.298866	0.229404	0.237005	0.208929	0.283957	0.291698	0.302843	0.276815	0.40267	0.379512	0.421004	0.192417	0.173496	0.338036	0.349788	0.488675	0.443455	0.197195	0.347798	0.461855	0.209929	0.421077	0.375603	0.302824				0.757305	0.271235	0.476935	0.321423	0.244486	0.218898	0.224271	0.192289	0.197398	0.244392	0.291129
96	0.618722	0.441679	0.484363	0.476002	0.496848	0.472775	0.422191	0.438129	0.0904291	0.289722	0.241361	0.180174	0.0728806	0.075521	0.049446	0.0780766	0.0506279	0.0602652	0.0187894	0.102113	0.0832786	0.108316	0.146255	0.129132	0.051164	0.0575026	0.153475	0.128897	0.121126	0.0362317	0.110923	0.13917	0.107556	0.0547295	0.0766628				0.512545	0.0221776	0.224117	0.0143349	0.0424223	0.0116241	0.0246358	0.0876642	0.0528908	0.00758005	0.0118827
97	0.640247	0.488201	0.527719	0.497259	0.526457	0.496567	0.433251	0.442403	0.160041	0.357596	0.30323	0.235964	0.145719	0.152166	0.138502	0.125588	0.104423	0.122761	0.0960937	0.173342	0.151155	0.196857	0.0451838	0.0459063	0.13378	0.127629	0.215262	0.208989	0.0544942	0.0896522	0.200899	0.0355252	0.185013	0.126853	0.0281418				0.518391	0.00796141	0.213305	0.0568293	0.00455069	0.00278579	0.000659865	0.0478595	0.00934229	0.0405726	0.0762124
98	0.528446	0.401501	0.412237	0.372562	0.43226	0.408816	0.325768	0.336281	0.112143	0.291203	0.227879	0.185961	0.127704	0.114824	0.101185	0.135012	0.122278	0.121094	0.128038	0.251932	0.21052	0.252891	0.064472	0.0544849	0.203169	0.216509	0.362754	0.32174	0.0507271	0.224201	0.366488	0.0978341	0.312001	0.289764	0.175555				0.685946	0.19464	0.392225	0.261688	0.221036	0.158403	0.140332	0.12571	0.168146	0.191906	0.206687
99	0.519776	0.384394	0.384358	0.364537	0.427521	0.420698	0.346383	0.35559	0.113003	0.286353	0.24377	0.200229	0.150188	0.141886	0.124018	0.17244	0.160664	0.158734	0.170644	0.291717	0.268122	0.301011	0.114871	0.132578	0.29077	0.323076	0.460387	0.408945	0.149912	0.337905	0.437505	0.152407	0.394383	0.376158	0.274427				0.818638	0.357212	0.545391	0.367928	0.318073	0.286038	0.265102	0.238982	0.269733	0.292567	0.307336
109	0.633793	0.570835	0.650357	0.534217	0.55533	0.478567	0.390581	0.375818	0.350162	0.509635	0.428495	0.346713	0.300561	0.33117	0.369709	0.142483	0.133948	0.207314	0.200044	0.153311	0.175306	0.27321	0.115087	0.0962247	0.268997	0.233246	0.190945	0.299823	0.0684491	0.155082	0.277395	0.15293	0.321399	0.223993	0.105513				0.486886	0.13257	0.14128	0.065428	0.0503156	0.0672641	0.108946	0.0460059	0.126413	0.193693	0.243306
110	0.602157	0.551182	0.60492	0.484739	0.500543	0.428464	0.344903	0.311199	0.324161	0.469092	0.402712	0.30448	0.272702	0.30481	0.339558	0.121878	0.11879	0.191153	0.192217	0.167171	0.180352	0.282954	0.123991	0.0943285	0.265671	0.234261	0.215316	0.307335	0.0703161	0.162642	0.305528	0.167494	0.332583	0.241412	0.0588676				0.476264	0.131818	0.14801	0.0937243	0.075555	0.0582464	0.10064	0.0484115	0.128387	0.199385	0.246127
111	0.272435	0.20489	0.27161	0.182938	0.18619	0.156191	0.110341	0.0670746	0.0608888	0.244271	0.240251	0.124373	0.112475	0.190962	0.256744	0.0391071	0.0511596	0.163227	0.202383	0.175274	0.215507	0.353026	0.206222	0.19156	0.392492	0.413282	0.402394	0.466755	0.247176	0.385438	0.491326	0.322496	0.545383	0.465139	0.161048				0.792937	0.213284	0.480861	0.372105	0.357683	0.365703	0.385099	0.316323	0.410922	0.482291	0.503556
112	0.264219	0.200814	0.287444	0.199355	0.192287	0.164133	0.129318	0.083301	0.119143	0.294615	0.314885	0.195128	0.190209	0.282627	0.368734	0.102916	0.107418	0.234429	0.282664	0.215056	0.274087	0.412535	0.282249	0.285977	0.486476	0.506374	0.461544	0.543115	0.332001	0.464862	0.542138	0.386479	0.615227	0.527933	0.184367				0.871608	0.279371	0.547797	0.421345	0.410729	0.44877	0.473194	0.395831	0.487993	0.555634	0.584708
113	0.460276	0.423377	0.491096	0.380097	0.366688	0.308521	0.262605	0.207369	0.30522	0.432362	0.426805	0.301095	0.291802	0.362577	0.427012	0.142328	0.141811	0.254736	0.279866	0.206083	0.257238	0.384672	0.247203	0.238395	0.427976	0.421578	0.367227	0.465385	0.251728	0.357788	0.456439	0.322443	0.520655	0.423594	0.0829224				0.699395	0.0972009	0.38127	0.290638	0.277347	0.295906	0.335338	0.264846	0.353692	0.429215	0.46887
114	0.415996	0.384159	0.455682	0.372055	0.350976	0.331346	0.319522	0.256825	0.346675	0.492301	0.531912	0.391502	0.385537	0.479434	0.553667	0.274896	0.279345	0.408308	0.441802	0.375146	0.434092	0.574005	0.418518	0.407575	0.618105	0.624535	0.579339	0.662185	0.451557	0.566593	0.660662	0.51164	0.727029	0.627537	0.318076				0.901218	0.315144	0.609052	0.508826	0.479851	0.48991	0.533964	0.458496	0.54024	0.629194	0.670189
115	0.483717	0.411339	0.441596	0.352319	0.315137	0.280163	0.240203	0.142015	0.219723	0.33879	0.36959	0.183873	0.19222	0.278211	0.315381	0.00890787	0.0200138	0.128538	0.136541	0.0680217	0.146196	0.25408	0.0898333	0.122781	0.335285	0.329635	0.276226	0.368419	0.148319	0.263877	0.337967	0.180069	0.406214	0.310409	0.00591187				0.632416	0.041652	0.323341	0.19151	0.162011	0.190193	0.229171	0.149033	0.220583	0.298471	0.342596
116	0.4198	0.424431	0.453617	0.335216	0.332776	0.303117	0.249548	0.164679	0.37555	0.450323	0.471033	0.329107	0.369824	0.436216	0.48446	0.190206	0.193961	0.29102	0.323063	0.254398	0.322831	0.4256	0.305881	0.345623	0.530592	0.522574	0.469516	0.570949	0.345391	0.462206	0.544946	0.393898	0.605807	0.520239	0.171766				0.837558	0.228049	0.503479	0.389811	0.374476	0.396144	0.43306	0.365013	0.437425	0.495556	0.541205
117	0.433263	0.436416	0.466829	0.365592	0.338339	0.31302	0.290948	0.204984	0.397096	0.480319	0.523596	0.370227	0.392985	0.474361	0.5332	0.231654	0.233346	0.349143	0.381904	0.307068	0.373478	0.497126	0.360198	0.374018	0.573228	0.571683	0.517671	0.611075	0.395317	0.509217	0.597771	0.449249	0.66315	0.568376	0.238686				0.850514	0.255882	0.547057	0.444835	0.422709	0.432686	0.47574	0.40394	0.482791	0.560596	0.603416
127	0.336974	0.181634	0.249349	0.226007	0.219446	0.230455	0.201672	0.165377	0.0950222	0.140457	0.150333	0.0071128	0.0327495	0.0634493	0.0635532	0.0867593	0.0552859	0.0371483	0.0156882	0.0163354	0.108293	0.197819	0.0224984	0.0518779	0.302325	0.333449	0.310224	0.363662	0.153271	0.303682	0.327601	0.129975	0.411045	0.325415	0.0658084				0.77537	0.228415	0.473336	0.253217	0.203662	0.284556	0.301051	0.196719	0.24991	0.324359	0.357262
128	0.468142	0.29557	0.363197	0.353469	0.357836	0.359148	0.31723	0.314695	0.0214685	0.200599	0.194245	0.0543159	0.0120794	0.0810006	0.0587737	0.0687048	0.0599857	0.00934565	0.0420983	0.0375903	0.0517144	0.0930836	0.0990934	0.0188935	0.244641	0.262877	0.230386	0.292837	0.069123	0.221007	0.223908	0.022484	0.300958	0.22661	0.0663342				0.714964	0.156703	0.378665	0.144158	0.110407	0.212675	0.221777	0.125836	0.174646	0.218096	0.253878
129	0.482189	0.333482	0.403772	0.390385	0.41946	0.461003	0.418743	0.415568	0.0738165	0.3129	0.284012	0.190696	0.163686	0.225639	0.17987	0.163801	0.182579	0.217241	0.164487	0.204757	0.287611	0.296474	0.0690397	0.203357	0.427809	0.433605	0.423279	0.473163	0.235358	0.380286	0.381569	0.163443	0.433343	0.36583	0.12439				0.855015	0.303533	0.514	0.271752	0.216119	0.310398	0.32713	0.240389	0.24975	0.277171	0.335249
130	0.496819	0.343779	0.41569	0.394218	0.412382	0.425753	0.383491	0.380548	0.0551189	0.294846	0.257757	0.163145	0.105087	0.159422	0.130237	0.0996174	0.113416	0.161035	0.112772	0.161882	0.21631	0.264478	0.00848535	0.0867512	0.317175	0.3306	0.344258	0.378953	0.142339	0.288837	0.324584	0.109285	0.37221	0.296169	0.0787518				0.748945	0.203151	0.428895	0.210566	0.151335	0.223655	0.239646	0.151631	0.178263	0.231219	0.280331
131	0.569507	0.396742	0.463006	0.439045	0.458056	0.410049	0.347334	0.382413	0.0439749	0.253418	0.195086	0.127586	0.0108594	0.0286783	0.023543	0.0434268	0.0748585	0.0417813	0.0858908	0.0523465	0.0344767	0.0227339	0.207572	0.151328	0.0576554	0.0731388	0.084835	0.127018	0.115171	0.0432017	0.0965995	0.107964	0.149994	0.0786458	0.202321				0.543523	0.0168739	0.201343	0.00245368	0.0161165	0.0630665	0.0577975	0.0256586	0.0536762	0.101213	0.11908
132	0.474987	0.308804	0.381743	0.360086	0.404009	0.375598	0.299001	0.360695	0.0106822	0.204969	0.113856	0.108688	0.00848263	0.00232631	0.0203686	0.0445562	0.0011682	0.00218613	0.0145641	0.0498788	0.0572317	0.0913594	0.0860221	0.00784314	0.195448	0.236514	0.245214	0.277569	0.0294284	0.21251	0.230204	0.0117297	0.28378	0.229065	0.0886176				0.74794	0.184976	0.375869	0.154603	0.150481	0.259338	0.245755	0.169668	0.240877	0.255316	0.277035
133	0.457675	0.302941	0.366519	0.345283	0.406438	0.401165	0.320347	0.377146	0.0142021	0.2277	0.123222	0.1455	0.0727174	0.0505667	0.00832733	0.179328	0.158202	0.137264	0.141322	0.258205	0.24246	0.262535	0.0725459	0.152542	0.322941	0.381093	0.43632	0.424758	0.158108	0.35834	0.375374	0.120858	0.392974	0.354126	0.0901797				0.886765	0.339808	0.51336	0.284521	0.266593	0.365091	0.349256	0.28863	0.330975	0.325845	0.36146
134	0.632592	0.48226	0.535036	0.502826	0.564083	0.531383	0.442073	0.499391	0.169977	0.367993	0.263764	0.279188	0.179347	0.14064	0.122056	0.240104	0.189728	0.159111	0.162179	0.277613	0.199762	0.212323	0.00959953	0.0259731	0.157945	0.166847	0.284394	0.259707	0.0429113	0.141958	0.237074	0.02313	0.205522	0.173269	0.0570751				0.653635	0.0949581	0.273439	0.0961801	0.0848948	0.12553	0.101025	0.0680313	0.127115	0.117356	0.14322
135	0.475739	0.355799	0.446675	0.381636	0.439293	0.424563	0.331122	0.374489	0.0808638	0.322327	0.181203	0.195356	0.132048	0.122501	0.0932415	0.217322	0.21829	0.208668	0.20624	0.347085	0.283116	0.330497	0.149269	0.147258	0.294302	0.294115	0.385715	0.408305	0.114115	0.271794	0.390254	0.178889	0.380752	0.329722	0.0525216				0.759066	0.152598	0.349161	0.204925	0.18917	0.236539	0.233749	0.19047	0.242132	0.24086	0.286148
136	0.388611	0.23361	0.342438	0.304865	0.337632	0.322217	0.256546	0.309226	0.0717266	0.177332	0.0490782	0.0634797	0.0411557	0.0375198	0.0750257	0.0789406	0.085194	0.102185	0.0433387	0.169672	0.157419	0.242364	0.0292803	0.00999842	0.225575	0.291503	0.324143	0.348275	0.108221	0.284161	0.317698	0.125257	0.382026	0.309361	0.00797859				0.807708	0.234531	0.42212	0.211855	0.194721	0.325727	0.319425	0.232621	0.295564	0.319035	0.353562
137	0.541787	0.363085	0.446715	0.42834	0.460952	0.411208	0.348243	0.418899	0.0231255	0.233067	0.127999	0.155663	0.00210144	0.028684	0.0299861	0.114402	0.0582098	0.0565114	0.0301196	0.125689	0.0268916	0.0730598	0.178926	0.241853	0.0989696	0.0730791	0.0787221	0.0384773	0.209189	0.00829384	0.0719403	0.155661	0.108297	0.0552953	0.184844				0.597707	0.0694795	0.238679	0.0224533	0.0264818	0.147309	0.096901	0.0166183	0.142858	0.178602	0.153551
138	0.537839	0.407093	0.497729	0.436873	0.487784	0.452146	0.364136	0.417603	0.108059	0.334196	0.189978	0.219267	0.119905	0.0912904	0.0738471	0.218863	0.207801	0.188984	0.168916	0.328435	0.219779	0.262555	0.0985074	0.00639372	0.0986106	0.0747429	0.258554	0.241741	0.0436041	0.100815	0.291339	0.0820657	0.249646	0.205514	0.023595				0.617566	0.0181539	0.201305	0.0929235	0.0869446	0.111281	0.0854327	0.0553678	0.14155	0.140851	0.156381
139	0.629695	0.501551	0.62513	0.55744	0.592257	0.559447	0.482034	0.536514	0.217023	0.461973	0.30845	0.340853	0.232189	0.221625	0.215068	0.350536	0.339979	0.339568	0.316971	0.441362	0.314097	0.372544	0.226593	0.0411657	0.159398	0.100482	0.170098	0.234429	0.0305841	0.0479438	0.207354	0.0752125	0.217162	0.126756	0.169064				0.49552	0.129249	0.0724553	0.0432615	0.0533302	0.0333208	0.0380909	0.0286406	0.057082	0.0891112	0.127914
140	0.794389	0.635371	0.774598	0.734905	0.746395	0.719435	0.672805	0.730649	0.335161	0.588149	0.460839	0.487615	0.341825	0.349376	0.351091	0.497551	0.482714	0.520313	0.475819	0.532337	0.438066	0.544011	0.347416	0.00184005	0.161466	0.0930754	0.0430742	0.11946	0.111856	0.0881321	0.0140715	0.101388	0.070518	0.073846	0.35632				0.348176	0.237945	0.0435883	0.235264	0.255053	0.0721712	0.0639055	0.184549	0.0779399	0.00135049	0.0400029
141	0.852934	0.690743	0.820264	0.782941	0.795036	0.756513	0.711515	0.770374	0.384438	0.627112	0.508753	0.533975	0.379473	0.378813	0.390898	0.527129	0.502828	0.536102	0.500588	0.56765	0.458852	0.555595	0.382134	0.0635356	0.164299	0.123687	0.17419	0.136101	0.0654271	0.0802426	0.0524436	0.0464575	0.0787872	0.0850476	0.283247				0.267482	0.313713	0.107022	0.262865	0.302366	0.138221	0.128803	0.259611	0.115263	0.0175423	0.0772634
148	0.52697	0.433721	0.535111	0.423187	0.470532	0.368788	0.245223	0.301203	0.147622	0.321171	0.154618	0.171995	0.0774088	0.0581122	0.0981237	0.025689	0.0695146	0.0252528	0.0324786	0.0938886	0.0985478	0.00116665	0.0911266	0.125431	0.00666063	0.00956106	0.0582933	0.0665126	0.144454	0.0397583	0.0674341	0.0365826	0.130656	0.0556664	0.350393				0.419226	0.199669	0.0185543	0.0799035	0.0436739	0.0246109	0.0238065	0.0367484	0.0827155	0.107445	0.119163
149	0.398749	0.307771	0.412731	0.311086	0.346652	0.284106	0.190386	0.216607	0.0661337	0.284724	0.163347	0.139417	0.0805682	0.107727	0.151031	0.0420063	0.039079	0.102553	0.118943	0.11881	0.10971	0.217951	0.103467	0.0700512	0.223824	0.218532	0.210759	0.303949	0.07248	0.192979	0.317803	0.179991	0.361036	0.287701	0.068812				0.635033	0.0172379	0.251829	0.157019	0.168716	0.20788	0.216224	0.158522	0.260058	0.294632	0.317784
150	0.397093	0.272123	0.368623	0.295798	0.335075	0.27798	0.185654	0.22992	0.0137276	0.216034	0.101741	0.0800971	0.000598619	0.026165	0.0596128	0.0260522	0.0347938	0.0252083	0.0379997	0.0417983	0.0501055	0.151727	0.0174783	0.0258396	0.199443	0.215986	0.208087	0.284241	0.0483221	0.196154	0.279281	0.114523	0.33454	0.266362	0.0926889				0.688035	0.0853082	0.303877	0.158483	0.169079	0.240431	0.237933	0.17048	0.268561	0.296361	0.315873
151	0.498907	0.354197	0.462708	0.40082	0.431026	0.33941	0.246319	0.320675	0.0438064	0.255615	0.149341	0.13943	0.00817585	0.0286355	0.105224	0.1398	0.163475	0.060013	0.053829	0.167583	0.099414	0.0168442	0.0928672	0.0680069	0.109548	0.129644	0.0584156	0.159383	0.0433818	0.0930567	0.127924	0.00904936	0.221651	0.141462	0.26781				0.580399	0.0154411	0.202081	0.0342415	0.0576412	0.168467	0.167217	0.0848864	0.194842	0.228857	0.243899
152	0.585656	0.459573	0.563844	0.483264	0.498919	0.38542	0.296512	0.334004	0.170473	0.345562	0.266526	0.197617	0.0807234	0.131924	0.201807	0.117862	0.1324	0.0169478	0.023264	0.152713	0.0782083	0.0408569	0.0916613	0.0803148	0.107293	0.106756	0.0180719	0.133896	0.0633529	0.0478356	0.0969926	0.0218965	0.192981	0.0969982	0.300662				0.476142	0.126464	0.117697	0.028053	0.0168227	0.0763748	0.0922183	0.00557311	0.112214	0.167847	0.192528
153	0.413646	0.281213	0.387891	0.326181	0.319412	0.265018	0.215712	0.214036	0.0336363	0.264529	0.246858	0.125606	0.0587833	0.157059	0.233459	0.0474013	0.0377765	0.0909051	0.102403	0.0144446	0.0917497	0.219574	0.0575216	0.0776571	0.292806	0.307863	0.24223	0.334251	0.12867	0.25609	0.304204	0.15677	0.394803	0.299569	0.0557071				0.68794	0.0956212	0.349309	0.188252	0.177284	0.258994	0.279448	0.18768	0.278609	0.345158	0.376
154	0.416312	0.266458	0.369757	0.325172	0.333119	0.299464	0.238661	0.257885	0.0196903	0.230757	0.205426	0.0792546	0.0243117	0.120613	0.176997	0.0891139	0.0698113	0.0340837	0.032967	0.0368207	0.0601791	0.151419	0.00246544	0.074362	0.286284	0.301042	0.235773	0.327634	0.114556	0.252472	0.272448	0.110215	0.363999	0.279662	0.0794791				0.72505	0.136053	0.369006	0.173929	0.162704	0.265816	0.279149	0.186134	0.261267	0.307957	0.341166
155	0.447845	0.289105	0.411144	0.36549	0.356537	0.280774	0.218406	0.248133	0.00598335	0.229505	0.228313	0.0655542	0.000501012	0.123184	0.207682	0.176628	0.15885	0.0204612	0.00701342	0.14117	0.0233157	0.0844841	0.0309373	0.0399449	0.241719	0.257791	0.158532	0.267265	0.0769331	0.204884	0.207528	0.0694847	0.320215	0.229442	0.170946				0.668955	0.0774491	0.313649	0.120004	0.121916	0.240808	0.255208	0.157075	0.245308	0.294755	0.322967
156	0.211463	0.0619171	0.150136	0.0943639	0.0669481	0.0111033	0.0341733	0.0804062	0.141857	0.057217	0.116982	0.0418308	0.0384383	0.0845034	0.197795	0.123523	0.127165	0.0204418	0.0875338	0.0277803	0.064266	0.200508	0.100975	0.147351	0.350099	0.393278	0.314578	0.39656	0.205598	0.356835	0.368461	0.207584	0.474217	0.391302	0.00135101				0.833386	0.252784	0.495376	0.306392	0.311951	0.410898	0.418364	0.324314	0.424587	0.478501	0.495957
157	0.290467	0.135018	0.209461	0.175198	0.153359	0.145793	0.107115	0.0507321	0.096893	0.113634	0.176847	0.0236416	0.0033767	0.119415	0.177484	0.109628	0.0919249	0.0281322	0.0550893	0.0232286	0.086653	0.187667	0.0464347	0.130603	0.353754	0.383125	0.313974	0.395709	0.194088	0.34061	0.34529	0.170506	0.445424	0.36121	0.0122397				0.81613	0.241414	0.484682	0.273498	0.254742	0.353791	0.368778	0.268859	0.341752	0.398624	0.428846
158	0.43325	0.271002	0.322071	0.30119	0.33137	0.301424	0.203698	0.218907	0.00375305	0.155824	0.184144	0.0141526	0.0610095	0.1237	0.146351	0.0944561	0.103727	0.0493111	0.00940373	0.0683706	0.0277233	0.0724464	0.0116827	0.118785	0.297518	0.314445	0.253282	0.338702	0.120172	0.272379	0.265503	0.0806372	0.347432	0.284854	0.0904502				0.780659	0.197044	0.411435	0.191898	0.190138	0.296967	0.301189	0.217482	0.281528	0.301231	0.332421
159	0.251616	0.00239658	0.0152968	0.0415363	0.055129	0.180092	0.310692	0.418238	0.346512	0.269389	0.165836	0.284548	0.231747	0.151912	0.0274672	0.294602	0.348846	0.230424	0.109672	0.226321	0.150951	0.0318013	0.0698023	0.00535727	0.179995	0.249857	0.174013	0.231766	0.0459701	0.227017	0.198706	0.00911059	0.304863	0.243207	0.178919				0.76435	0.204212	0.419021	0.192492	0.221236	0.342046	0.327116	0.236852	0.348816	0.380446	0.380165
160	0.12744	0.0734986	0.0212696	0.0489255	0.154195	0.13257	0.136259	0.294792	0.299645	0.138432	0.00558111	0.238026	0.186361	0.0320664	0.0376559	0.286158	0.27847	0.127441	0.08226	0.199255	0.0699466	0.0526261	0.072211	0.0117255	0.248163	0.296995	0.201541	0.281932	0.110239	0.260903	0.23271	0.0632278	0.363571	0.271668	0.0946106				0.749002	0.192952	0.443347	0.205282	0.189654	0.311184	0.323069	0.205497	0.292037	0.364353	0.381567
161	0.173368	0.0325255	0.0804978	0.0745139	0.0578032	0.140466	0.134458	0.0323557	0.0505252	0.112628	0.2594	0.0407094	0.111588	0.250363	0.278495	0.017605	0.0325805	0.137188	0.159615	0.0806211	0.216111	0.281652	0.154249	0.288339	0.514409	0.539517	0.459266	0.545954	0.354164	0.497088	0.466085	0.284312	0.575114	0.495396	0.157365				0.988264	0.423232	0.659492	0.410829	0.377852	0.494327	0.513718	0.405709	0.451658	0.500221	0.53985
162	0.229806	0.119051	0.132011	0.14977	0.191346	0.28063	0.253919	0.193536	0.197357	0.262895	0.42723	0.247497	0.334356	0.430558	0.44669	0.203491	0.192165	0.256825	0.298336	0.218407	0.336456	0.370195	0.295124	0.450778	0.635139	0.650608	0.574531	0.665194	0.461076	0.606347	0.573711	0.387884	0.665097	0.602941	0.233892				1.11216	0.533215	0.751569	0.509853	0.493663	0.60721	0.620615	0.529677	0.57167	0.591256	0.633513
163	0.197261	0.0893997	0.114171	0.0979349	0.044584	0.145611	0.144514	0.00778182	0.111012	0.179383	0.335644	0.115362	0.205786	0.3285	0.345585	0.0518024	0.0584358	0.156414	0.183901	0.0870258	0.220066	0.282058	0.177891	0.313631	0.52358	0.538414	0.448976	0.548145	0.355053	0.489987	0.464712	0.293109	0.572297	0.492665	0.131812				0.968278	0.389566	0.632136	0.396891	0.370756	0.47971	0.50286	0.399937	0.448778	0.493888	0.535815
164	0.187024	0.0837457	0.0973149	0.0945301	0.0470865	0.167747	0.184347	0.0224325	0.0509944	0.154956	0.30649	0.0705431	0.159861	0.29435	0.288633	0.0204323	0.0437553	0.138802	0.145227	0.0697753	0.213793	0.265765	0.130233	0.276418	0.506959	0.519645	0.43897	0.532886	0.340219	0.473175	0.444236	0.263039	0.55171	0.469106	0.149385				0.949264	0.384742	0.631093	0.379478	0.333745	0.440507	0.468432	0.358606	0.391881	0.445345	0.492279
174	0.0576016	0.0528772	0.12226	0.115353	0.0734848	0.124052	0.176317	0.1106	0.348586	0.387487	0.566363	0.405559	0.445168	0.564931	0.659443	0.328535	0.309582	0.451503	0.518231	0.391357	0.499017	0.621865	0.524962	0.596399	0.806234	0.840013	0.74688	0.838113	0.652695	0.793393	0.793493	0.632719	0.90563	0.817257	0.433495				1.23953	0.656175	0.920618	0.724756	0.710738	0.799219	0.824187	0.724395	0.802025	0.865112	0.897615
175	0.297226	0.29261	0.328112	0.229683	0.182486	0.171619	0.152805	0.049492	0.335386	0.361558	0.442005	0.279728	0.337393	0.426462	0.485317	0.153356	0.147761	0.263626	0.307858	0.196453	0.292794	0.398706	0.303515	0.370662	0.56057	0.568004	0.481374	0.589404	0.387727	0.51114	0.544266	0.399026	0.637797	0.549764	0.161489				0.926043	0.322451	0.589419	0.431487	0.423623	0.490239	0.520379	0.43484	0.512259	0.568128	0.606841
176	0.323771	0.313313	0.358473	0.225463	0.150961	0.120648	0.0865139	0.033852	0.30709	0.300916	0.363167	0.199433	0.274433	0.361255	0.408578	0.0656469	0.0594944	0.17175	0.211292	0.0813688	0.18754	0.284029	0.210123	0.291978	0.469539	0.472645	0.368479	0.489734	0.298242	0.414549	0.431505	0.301833	0.536205	0.448154	0.032258				0.840227	0.231775	0.489449	0.323183	0.32417	0.411459	0.439145	0.35056	0.429309	0.477253	0.514829
177	0.260643	0.202521	0.283853	0.187914	0.158865	0.149413	0.0913794	0.0265889	0.272746	0.293229	0.373735	0.208737	0.291081	0.378767	0.424077	0.0978557	0.0914919	0.193282	0.236744	0.1191	0.229691	0.310669	0.239846	0.343778	0.521524	0.528133	0.432428	0.547233	0.34974	0.475842	0.480734	0.336101	0.581975	0.502127	0.0938712				0.932114	0.327517	0.571917	0.384811	0.382842	0.479142	0.501299	0.412467	0.481852	0.519447	0.557848
178	0.243554	0.211504	0.329229	0.252143	0.2445	0.253447	0.232323	0.167685	0.356175	0.454571	0.538564	0.392117	0.430148	0.528896	0.60056	0.2683	0.26592	0.383826	0.422131	0.310907	0.41485	0.512932	0.409585	0.487291	0.68106	0.684445	0.596119	0.708489	0.504633	0.625378	0.651215	0.507794	0.74662	0.657702	0.273526				1.04827	0.440235	0.700216	0.531457	0.516498	0.596542	0.628914	0.540177	0.605791	0.657173	0.703578
179	0.237022	0.196172	0.287302	0.166943	0.144192	0.0722837	0.0231826	0.0388616	0.200624	0.259347	0.289999	0.179066	0.215519	0.290775	0.376684	0.0536247	0.0367874	0.157503	0.216857	0.0937218	0.175259	0.292667	0.226998	0.275822	0.443907	0.458185	0.368749	0.478662	0.283944	0.409888	0.444979	0.312899	0.541177	0.458077	0.0382283				0.84418	0.23805	0.489229	0.340681	0.353828	0.432634	0.451199	0.370281	0.465	0.50944	0.537059
180	0.356646	0.258104	0.407892	0.318007	0.283209	0.138108	0.104118	0.0665426	0.256259	0.291149	0.332874	0.202448	0.209365	0.307092	0.394481	0.0221628	0.00546635	0.138451	0.184203	0.0092773	0.116508	0.236919	0.174746	0.232121	0.405854	0.420626	0.293219	0.416357	0.248264	0.361571	0.358002	0.248348	0.483606	0.388071	0.0570155				0.791071	0.191745	0.440046	0.266649	0.280973	0.3991	0.420847	0.324492	0.420381	0.471229	0.499988
181	0.178133	0.116275	0.285191	0.179064	0.194389	0.199231	0.129253	0.099306	0.222579	0.389868	0.407	0.323958	0.364496	0.445359	0.516433	0.188731	0.18597	0.291331	0.325516	0.205551	0.314922	0.39563	0.321632	0.417303	0.588997	0.585594	0.488544	0.615011	0.414865	0.531246	0.546637	0.417946	0.647201	0.564094	0.151551				0.979972	0.365867	0.60546	0.430736	0.428337	0.530042	0.554808	0.467386	0.533003	0.567047	0.610355
182	0.462497	0.393873	0.455589	0.314383	0.366967	0.243562	0.0864455	0.0559579	0.112656	0.216301	0.106189	0.00535207	0.0282557	0.0607201	0.091559	0.210069	0.195708	0.117732	0.0955523	0.180113	0.10438	0.0216404	0.0905993	0.024388	0.125572	0.119097	0.0525672	0.1717	0.046167	0.0769912	0.135516	0.00112839	0.209783	0.138872	0.272855				0.539483	0.0777173	0.15255	0.0127142	0.0329401	0.104737	0.113836	0.0451661	0.136555	0.161011	0.186815
183	0.0734506	0.0635905	0.19155	0.0144763	0.0442437	0.0216132	0.143526	0.168282	0.0273266	0.15335	0.047842	0.0284691	0.134013	0.160457	0.227733	0.00387937	0.00525266	0.0775982	0.145051	0.0665665	0.124652	0.20998	0.211137	0.280053	0.388323	0.387606	0.323573	0.451754	0.241692	0.365795	0.430447	0.31258	0.503621	0.446014	0.00111953				0.845324	0.217332	0.435429	0.312906	0.347686	0.417896	0.422519	0.363796	0.452699	0.456411	0.479556
184	0.184604	0.054171	0.239033	0.170145	0.16391	0.040269	0.000203453	0.0901532	0.0509837	0.220422	0.210945	0.263879	0.228557	0.286545	0.439228	0.155274	0.0736277	0.216851	0.304472	0.11705	0.193183	0.322338	0.316493	0.357224	0.49127	0.521054	0.397958	0.514195	0.353545	0.477402	0.466829	0.362987	0.59108	0.508511	0.0297204				0.938637	0.343335	0.564741	0.393628	0.429926	0.563626	0.570808	0.483879	0.58918	0.617878	0.636921
185	0.128085	0.0062088	0.181383	0.104687	0.0987174	0.0355061	0.00985734	0.0410899	0.12292	0.168182	0.13223	0.146937	0.108534	0.225306	0.395396	0.151695	0.0992374	0.248882	0.338784	0.183726	0.253435	0.387068	0.354255	0.383215	0.53219	0.558666	0.457414	0.570688	0.391303	0.51855	0.532192	0.418115	0.643277	0.560299	0.110276				0.979019	0.376046	0.602183	0.439698	0.463567	0.583027	0.593619	0.508966	0.606372	0.637491	0.662531
186	0.402679	0.312857	0.443021	0.328366	0.354846	0.227317	0.122014	0.181129	0.103718	0.251896	0.124713	0.13542	0.0574353	0.086644	0.183634	0.0563812	0.106268	0.00820573	0.0531066	0.101447	0.0541244	0.0777363	0.0503888	0.0412097	0.165969	0.177879	0.0779767	0.204199	0.0304027	0.140571	0.186739	0.0981701	0.288127	0.206658	0.255091				0.588144	0.0183958	0.202903	0.0788049	0.124291	0.227513	0.230864	0.158611	0.279826	0.307114	0.319374
187	0.122122	0.0452993	0.237208	0.120027	0.122775	0.0357264	0.0315937	0.0341428	0.00149535	0.189932	0.0740585	0.129151	0.154462	0.199573	0.301754	0.148126	0.115069	0.204354	0.26937	0.138974	0.190711	0.294189	0.330687	0.370235	0.452967	0.457386	0.352328	0.497384	0.332008	0.434031	0.466728	0.39752	0.573665	0.50186	0.0130232				0.893369	0.279524	0.487716	0.359823	0.405894	0.521557	0.5276	0.457419	0.555214	0.563488	0.582427
188	0.260651	0.114325	0.301622	0.249536	0.250246	0.145266	0.101175	0.226726	0.0125209	0.205619	0.125351	0.23672	0.136122	0.20195	0.374138	0.275586	0.128058	0.257169	0.344054	0.128689	0.17443	0.31041	0.342988	0.351586	0.44859	0.48003	0.340122	0.464435	0.327177	0.43865	0.413668	0.340536	0.550448	0.46481	0.0429006				0.896045	0.309933	0.511999	0.343876	0.394405	0.555501	0.558187	0.472617	0.584178	0.604553	0.619381
189	0.131631	0.0274194	0.188959	0.0900408	0.111956	0.0364245	0.0504882	0.0246644	0.178575	0.0578601	0.0947024	0.0428508	0.113864	0.0427714	0.0560497	0.0012014	0.013187	0.0801116	0.151166	0.0733084	0.0955616	0.208375	0.262776	0.279144	0.348872	0.364489	0.297054	0.432692	0.250075	0.36939	0.425498	0.340847	0.515282	0.455854	0.0212918				0.871907	0.256	0.446668	0.321191	0.371796	0.483232	0.476828	0.415789	0.515671	0.509226	0.520569
190	0.155986	0.0706916	0.23508	0.120965	0.14034	0.0421336	0.046442	0.0361469	0.100124	0.0794306	0.0792743	0.0050264	0.0717162	0.0422192	0.0512601	0.000579492	0.0305216	0.0415824	0.0978799	0.00287198	0.00720688	0.123223	0.205463	0.195115	0.231211	0.244396	0.164382	0.313568	0.161447	0.260936	0.329645	0.284138	0.424134	0.368851	0.131891				0.755149	0.144066	0.325049	0.229588	0.300391	0.407309	0.395281	0.34217	0.454876	0.44172	0.441516
193	0.495592	0.455296	0.635061	0.48985	0.489794	0.355471	0.262002	0.323801	0.405241	0.434927	0.298434	0.326108	0.310194	0.308354	0.378924	0.142919	0.0639452	0.162766	0.193055	0.0259176	0.029237	0.148963	0.164919	0.165298	0.254591	0.257403	0.0890663	0.238458	0.122451	0.193245	0.182602	0.155992	0.324789	0.224904	0.295068				0.575177	0.0148338	0.20626	0.0774966	0.13453	0.28219	0.29839	0.21487	0.335136	0.368716	0.386906
194	0.247376	0.244203	0.416822	0.259047	0.2455	0.116656	0.0566995	0.105664	0.271836	0.304831	0.202041	0.23142	0.253772	0.268126	0.349575	0.145284	0.101805	0.187536	0.239352	0.0816703	0.120157	0.234962	0.274799	0.28035	0.349762	0.350282	0.218035	0.367957	0.233824	0.310971	0.345963	0.315073	0.462675	0.380664	0.130631				0.705278	0.102167	0.32179	0.229786	0.292066	0.400644	0.412267	0.345222	0.461949	0.481228	0.495143
195	0.322407	0.286721	0.415246	0.266958	0.267148	0.103807	0.0227658	0.0778385	0.163044	0.212432	0.106269	0.130607	0.0867983	0.0981858	0.20237	0.0095362	0.0756126	0.0272024	0.0896556	0.0704276	0.0562416	0.0861071	0.111614	0.0694035	0.148645	0.163601	0.0454339	0.175701	0.036938	0.127596	0.180749	0.134665	0.287838	0.207463	0.293634				0.529241	0.0663933	0.153609	0.0740847	0.146764	0.240715	0.242245	0.181089	0.321232	0.344297	0.345587
196	0.29048	0.262596	0.425126	0.276837	0.277275	0.162378	0.0886594	0.117591	0.241045	0.330684	0.229543	0.230508	0.241117	0.270009	0.355108	0.113745	0.0789375	0.180665	0.228015	0.0814384	0.132006	0.251603	0.245751	0.253074	0.360603	0.359233	0.244234	0.386479	0.223503	0.314052	0.361596	0.297616	0.467651	0.381456	0.0939316				0.718294	0.105051	0.338645	0.233918	0.276475	0.373062	0.389344	0.317842	0.428203	0.458128	0.479417
197	0.304382	0.271103	0.406434	0.28017	0.259028	0.0837144	0.0506784	0.0963802	0.29826	0.293757	0.265507	0.261209	0.243499	0.278452	0.398952	0.119932	0.0504287	0.17844	0.256422	0.0769075	0.120697	0.267714	0.271847	0.261428	0.374204	0.398061	0.269736	0.390936	0.244682	0.349384	0.372802	0.300235	0.491675	0.402908	0.0931895				0.750031	0.154542	0.392057	0.277462	0.332583	0.437865	0.448176	0.372713	0.503207	0.540653	0.551016
198	0.360758	0.335345	0.445989	0.312555	0.283556	0.103411	0.067235	0.104665	0.278503	0.285653	0.248204	0.234719	0.19158	0.224717	0.347268	0.0731338	0.00197431	0.132146	0.206197	0.0307472	0.0548013	0.217114	0.213567	0.163153	0.273277	0.297222	0.170637	0.287254	0.148088	0.244745	0.288638	0.228256	0.402888	0.308942	0.182686				0.608117	0.0203726	0.266256	0.182764	0.245773	0.334809	0.345769	0.275809	0.422627	0.468697	0.472647
199	0.334483	0.295545	0.420941	0.297538	0.276044	0.131846	0.0959281	0.121344	0.249091	0.319777	0.280654	0.25626	0.213308	0.260411	0.381558	0.114274	0.0616766	0.194285	0.263283	0.114215	0.139866	0.302302	0.273547	0.220758	0.348553	0.368071	0.261244	0.375613	0.219118	0.319393	0.383735	0.309202	0.486722	0.392444	0.0676796				0.685376	0.0898555	0.343969	0.263729	0.311591	0.385028	0.400481	0.33064	0.468956	0.520368	0.529708
200	0.343705	0.310312	0.443063	0.338624	0.302585	0.175129	0.170074	0.179033	0.367502	0.419832	0.431321	0.378452	0.34989	0.416198	0.540664	0.230388	0.181625	0.327791	0.396653	0.236458	0.286535	0.44737	0.395569	0.367907	0.521393	0.54161	0.426544	0.540052	0.378405	0.482793	0.528542	0.440156	0.640072	0.538164	0.0892305				0.844132	0.246829	0.514212	0.40953	0.439314	0.520209	0.545344	0.464373	0.589177	0.652227	0.672011
201	0.495099	0.514779	0.619297	0.486458	0.445138	0.313018	0.298076	0.286683	0.538379	0.54788	0.541675	0.470599	0.460506	0.516187	0.613797	0.294133	0.251754	0.385231	0.43424	0.271098	0.323189	0.47342	0.416038	0.38852	0.536712	0.540155	0.412198	0.538585	0.381197	0.465293	0.516374	0.447375	0.62826	0.517153	0.0667966				0.775335	0.174842	0.454733	0.369419	0.396022	0.47097	0.50833	0.428513	0.549166	0.619578	0.647627
	0.387901	0.449175	0.545721	0.367579	0.352526	0.259865	0.201075	0.169558	0.422418	0.473115	0.405541	0.343825	0.370317	0.405887	0.47034	0.205185	0.194166	0.289373	0.323901	0.221826	0.255698	0.379742	0.328141	0.304924	0.429596	0.409783	0.320382	0.455508	0.272305	0.347725	0.454492	0.386875	0.530054	0.435418	0.0137108				0.653545	0.0365166	0.310015	0.271208	0.297429	0.326106	0.363571	0.305934	0.413778	0.467255	0.499119
	0.292346	0.330365	0.426937	0.263692	0.26311	0.187971	0.126352	0.0966578	0.305709	0.396761	0.33402	0.275728	0.300184	0.340094	0.411076	0.170399	0.166888	0.26092	0.305939	0.23567	0.260419	0.387149	0.329541	0.304205	0.434821	0.423026	0.365178	0.484983	0.284864	0.378348	0.503813	0.410392	0.563144	0.480523	0.0830483				0.720777	0.103309	0.37075	0.331551	0.35499	0.364123	0.393085	0.34183	0.448451	0.495468	0.522115
	0.0120335	0.0485893	0.214378	0.116259	0.118786	0.107346	0.121358	0.126519	0.360371	0.491824	0.525219	0.508352	0.540392	0.616347	0.756888	0.535373	0.515818	0.647565	0.755989	0.681752	0.70924	0.869015	0.834155	0.812752	0.959916	0.990932	0.942349	1.03401	0.838094	0.970402	1.06583	0.939822	1.13914	1.0635	0.657581				1.36817	0.760062	1.02472	0.945272	0.965292	0.992356	1.01259	0.952711	1.06057	1.10471	1.1254
215	0.203515	0.396747	0.499251	0.276745	0.23498	0.201235	0.153163	0.081433	0.531132	0.476908	0.448485	0.35501	0.470093	0.521832	0.54944	0.241457	0.242326	0.330998	0.360726	0.224048	0.321123	0.405922	0.376764	0.455041	0.589498	0.570293	0.448239	0.602754	0.425443	0.511139	0.544469	0.46583	0.652326	0.563235	0.10635				0.901376	0.273059	0.5283	0.403565	0.419296	0.505724	0.540411	0.460872	0.53891	0.575278	0.617268
216	0.177074	0.393383	0.546065	0.324443	0.253499	0.237008	0.213887	0.152086	0.601002	0.521843	0.512049	0.41605	0.536819	0.601956	0.622713	0.309328	0.305744	0.400587	0.426375	0.264556	0.378007	0.459341	0.439614	0.532732	0.66889	0.654103	0.509757	0.669167	0.512315	0.593558	0.593688	0.525919	0.722866	0.628949	0.155415				0.992712	0.372721	0.622879	0.472365	0.487947	0.603675	0.63843	0.547287	0.622938	0.660867	0.702354
217	0.163667	0.300003	0.456572	0.278821	0.211568	0.159015	0.146926	0.0951684	0.527441	0.433034	0.46928	0.361595	0.460128	0.53386	0.573782	0.247952	0.228517	0.335708	0.37691	0.211108	0.324996	0.41346	0.387167	0.482213	0.631244	0.632219	0.494968	0.636238	0.474917	0.575377	0.561652	0.468164	0.690602	0.600954	0.135383				1.00456	0.394741	0.639065	0.464914	0.479892	0.602117	0.628917	0.534612	0.613921	0.651543	0.687725
218	0.21038	0.237725	0.418151	0.269002	0.245488	0.142017	0.112928	0.0937311	0.481598	0.417924	0.421115	0.346516	0.417838	0.475931	0.539154	0.217296	0.188889	0.301961	0.350406	0.184908	0.283315	0.3854	0.359751	0.430262	0.573422	0.576869	0.445923	0.583588	0.418836	0.520928	0.522456	0.431221	0.645187	0.555431	0.0881144				0.942854	0.332511	0.576347	0.418887	0.440327	0.555034	0.579129	0.490209	0.579305	0.617256	0.649602
219	0.0521574	0.0541106	0.206443	0.0395903	0.00507503	0.150629	0.179082	0.135396	0.220979	0.128528	0.113688	0.119045	0.204157	0.226374	0.303958	0.0539431	0.00436448	0.0917094	0.172289	0.0168435	0.0870504	0.181294	0.220907	0.296568	0.390887	0.406153	0.287812	0.418758	0.25842	0.37299	0.373804	0.283693	0.48682	0.42073	0.0816581				0.842781	0.236034	0.448226	0.297138	0.348665	0.464861	0.46805	0.394698	0.495799	0.504315	0.520276
220	0.00582105	0.0463514	0.153635	0.00118204	0.027247	0.180532	0.193865	0.115901	0.27649	0.143252	0.141082	0.15587	0.281678	0.300686	0.351507	0.119297	0.0745226	0.143844	0.219109	0.0686366	0.154895	0.222936	0.267459	0.380287	0.475823	0.487463	0.367018	0.500067	0.339166	0.455172	0.433609	0.335398	0.550279	0.488434	0.00897277				0.946332	0.341776	0.54502	0.366583	0.409851	0.541316	0.544819	0.46636	0.551424	0.553287	0.574536
221	0.134239	0.0624758	0.273692	0.127457	0.125235	0.0220828	0.0797365	0.0588134	0.296123	0.221112	0.185996	0.149594	0.262274	0.307568	0.353567	0.0734842	0.0390318	0.130905	0.188022	0.029617	0.13453	0.20894	0.216373	0.325807	0.450105	0.457593	0.333859	0.46851	0.302423	0.416123	0.394955	0.292067	0.516026	0.443136	0.03249				0.895046	0.29085	0.504729	0.318658	0.347744	0.481838	0.49203	0.405512	0.48675	0.50177	0.528699
222	0.118282	0.0437996	0.270363	0.154842	0.14312	0.0417323	0.00450567	0.0654345	0.274493	0.308349	0.240889	0.272457	0.365149	0.384241	0.45704	0.209332	0.163141	0.259412	0.318881	0.148547	0.236397	0.328107	0.348751	0.426616	0.534364	0.541553	0.409775	0.551128	0.396841	0.500235	0.489088	0.410014	0.614892	0.536451	0.0432051				0.956332	0.351273	0.566746	0.402951	0.440377	0.575588	0.587309	0.503141	0.593684	0.611226	0.635773
223	0.0525121	0.138291	0.100026	0.00498431	0.0103065	0.113904	0.128934	0.0129408	0.181069	0.203586	0.145244	0.227082	0.379779	0.390313	0.437594	0.2687	0.24022	0.296047	0.357972	0.208971	0.296687	0.357149	0.423775	0.537987	0.611119	0.613362	0.484604	0.635655	0.489818	0.589064	0.567599	0.500306	0.693405	0.629695	0.119327				1.07424	0.469839	0.66384	0.494556	0.539749	0.683679	0.688967	0.609451	0.688323	0.685477	0.70747
224	0.334367	0.226532	0.442943	0.329149	0.314496	0.268284	0.107336	0.176519	0.149065	0.15118	0.0647301	0.0736776	0.107935	0.16115	0.201912	0.0403263	0.121101	0.0213546	0.0316165	0.176804	0.0719981	0.00281859	0.0426398	0.151743	0.256521	0.273394	0.119884	0.255259	0.127292	0.231468	0.164544	0.0851771	0.311392	0.235917	0.268784				0.71786	0.136215	0.329102	0.119669	0.162625	0.337832	0.341453	0.247076	0.335715	0.347064	0.365739
225	0.351673	0.226943	0.436641	0.349869	0.347802	0.305078	0.191908	0.273883	0.0943857	0.311134	0.126653	0.139385	0.17495	0.221882	0.254162	0.0159074	0.0896614	0.0335487	0.0650305	0.153801	0.0324733	0.0506958	0.0649392	0.16459	0.285528	0.29475	0.142289	0.285434	0.148997	0.249454	0.196197	0.119568	0.342645	0.259972	0.231228				0.727569	0.140076	0.339214	0.136388	0.171391	0.343035	0.350729	0.254142	0.341175	0.359159	0.381528
226	0.36195	0.262088	0.453525	0.350788	0.362505	0.272795	0.1591	0.261698	0.17005	0.259683	0.100117	0.184221	0.187702	0.178501	0.24222	0.0753606	0.0264271	0.0594341	0.105702	0.114826	0.0408174	0.0504559	0.110657	0.177769	0.2501	0.264509	0.109492	0.252241	0.132403	0.226274	0.179089	0.126602	0.323302	0.246873	0.277782				0.696794	0.113266	0.298832	0.120783	0.178876	0.350714	0.351101	0.266502	0.367532	0.373969	0.387557
227	0.34046	0.220786	0.426466	0.352565	0.344394	0.288132	0.198162	0.301773	0.165327	0.232287	0.108059	0.200977	0.217326	0.230882	0.267342	0.139956	0.0472275	0.10904	0.146986	0.0769429	0.00272175	0.0706655	0.150264	0.245334	0.307137	0.324001	0.154187	0.295047	0.199018	0.286639	0.200271	0.155554	0.360108	0.285438	0.248414				0.7647	0.197832	0.370199	0.165814	0.223608	0.421229	0.420896	0.328929	0.420104	0.42242	0.4361
228	0.223132	0.0774564	0.270018	0.218748	0.214113	0.191654	0.110307	0.210166	0.0877377	0.0610306	0.0554097	0.0515684	0.0474356	0.142777	0.160822	0.07522	0.0146028	0.0771493	0.0996855	0.0976654	0.0218723	0.0619605	0.129316	0.272465	0.357577	0.362224	0.208412	0.359431	0.243998	0.336305	0.252605	0.190809	0.408275	0.338564	0.162634				0.84625	0.272523	0.441705	0.218101	0.25658	0.452809	0.453961	0.356897	0.426075	0.424023	0.443583
229	0.412111	0.301612	0.45129	0.359401	0.405703	0.349622	0.196196	0.309081	0.0704618	0.178804	0.0558727	0.094124	0.0369314	0.0571628	0.0044463	0.0140692	0.161451	0.133335	0.0713403	0.272767	0.238694	0.172674	0.0535845	0.0452521	0.0701542	0.0906129	0.033273	0.101676	0.0301157	0.0804126	0.0289632	0.0399758	0.15618	0.106776	0.416335				0.616292	0.0372961	0.1845	0.00715886	0.0621813	0.238757	0.221358	0.150696	0.242667	0.217752	0.222779
230	0.262252	0.154481	0.356919	0.264728	0.25713	0.220823	0.132829	0.212053	0.0072526	0.120233	0.0487464	0.0506279	0.0192293	0.0432041	0.0680486	0.0446482	0.00448701	0.0278832	0.0232154	0.17609	0.0930547	0.0485277	0.0529532	0.163822	0.194676	0.190447	0.0244185	0.199136	0.119175	0.179231	0.107559	0.107496	0.273336	0.203884	0.324261				0.673877	0.102775	0.256051	0.0658321	0.121475	0.322088	0.321281	0.231879	0.306742	0.296879	0.309539
252	0.376652	0.422531	0.589122	0.421832	0.406946	0.307963	0.264224	0.301504	0.429257	0.520195	0.38876	0.423057	0.414826	0.423361	0.490395	0.392924	0.396686	0.449138	0.472392	0.421899	0.382525	0.497628	0.548737	0.435022	0.430848	0.399543	0.316759	0.459617	0.3823	0.37577	0.545495	0.633413	0.608217	0.534469	0.119046				0.501828	0.00919714	0.208619	0.347841	0.437283	0.427949	0.45323	0.441039	0.569392	0.593613	0.590439
253	0.33983	0.390829	0.54546	0.369647	0.357262	0.260452	0.208918	0.235872	0.364777	0.462466	0.326071	0.349065	0.339176	0.346316	0.40737	0.306228	0.313199	0.364364	0.382902	0.345291	0.3017	0.416897	0.451165	0.32735	0.330353	0.292715	0.224529	0.362419	0.274858	0.265924	0.45871	0.54003	0.507157	0.434555	0.0511172				0.364925	0.1397	0.0847703	0.248691	0.332261	0.295191	0.324047	0.318551	0.44575	0.475355	0.473028
254	0.375519	0.406561	0.564759	0.395502	0.386989	0.288621	0.233463	0.267279	0.352634	0.465606	0.321167	0.351429	0.327349	0.330739	0.391148	0.312431	0.318268	0.364739	0.379228	0.351144	0.296685	0.409688	0.444623	0.305116	0.29967	0.261577	0.19817	0.330655	0.252262	0.236093	0.434151	0.524461	0.478495	0.406332	0.0346138				0.319137	0.172922	0.045834	0.22066	0.30732	0.270436	0.297359	0.295233	0.425102	0.453887	0.448056
255	0.35204	0.373437	0.536029	0.380115	0.37003	0.267504	0.223687	0.265337	0.351827	0.464619	0.337421	0.37077	0.343817	0.355297	0.431397	0.343214	0.342548	0.403009	0.432548	0.394353	0.344374	0.472035	0.51339	0.377759	0.384195	0.361789	0.296848	0.426339	0.341761	0.34775	0.533391	0.601638	0.588062	0.517616	0.11863				0.498863	0.0152817	0.205736	0.346074	0.435727	0.41299	0.43133	0.421062	0.559208	0.585125	0.573607
256	0.362782	0.394008	0.545005	0.388818	0.377163	0.272681	0.233047	0.267834	0.382697	0.487404	0.374164	0.395428	0.370758	0.386139	0.467911	0.356819	0.352195	0.422437	0.459284	0.41799	0.370564	0.508598	0.536066	0.397854	0.420891	0.402454	0.343761	0.46514	0.367374	0.38435	0.575074	0.623085	0.625412	0.552862	0.163719				0.529616	0.0142293	0.247868	0.389577	0.474585	0.436385	0.456999	0.446867	0.589222	0.62304	0.611676
257	0.453534	0.467814	0.61738	0.469437	0.459246	0.351846	0.312824	0.35183	0.429277	0.54727	0.433439	0.455814	0.413171	0.426865	0.51108	0.4151	0.406868	0.477837	0.512731	0.481169	0.420266	0.563084	0.58256	0.417511	0.437748	0.420676	0.371353	0.478349	0.39009	0.399675	0.601433	0.655138	0.643166	0.568278	0.206704				0.492323	0.00556005	0.240593	0.410101	0.497444	0.444777	0.466681	0.463457	0.612739	0.652876	0.636556
258	0.369514	0.386407	0.548544	0.392112	0.387448	0.300403	0.253223	0.284406	0.345727	0.48954	0.356933	0.378806	0.351661	0.369172	0.435951	0.360037	0.373484	0.432758	0.453576	0.445488	0.393291	0.518411	0.538323	0.394112	0.412035	0.381413	0.344434	0.469502	0.369888	0.374007	0.59471	0.650581	0.629177	0.562277	0.210248				0.511024	0.00800146	0.223019	0.388232	0.463745	0.407074	0.431208	0.42809	0.557447	0.587807	0.579485
259	0.411545	0.436103	0.594435	0.441017	0.434382	0.346888	0.306957	0.334282	0.426988	0.562116	0.446454	0.459973	0.439215	0.462969	0.538891	0.435944	0.443217	0.514206	0.546182	0.52555	0.480644	0.616156	0.627862	0.492059	0.528661	0.504921	0.46334	0.585135	0.468508	0.489587	0.696941	0.726312	0.735745	0.662278	0.293645				0.645319	0.106357	0.352935	0.490798	0.560021	0.51075	0.538783	0.529042	0.661304	0.698062	0.695469
260	0.422242	0.456357	0.595803	0.43065	0.427945	0.341862	0.289187	0.303908	0.404378	0.536706	0.412874	0.413643	0.394154	0.411017	0.474512	0.36721	0.37686	0.439985	0.462538	0.453838	0.405048	0.533509	0.52461	0.3838	0.424848	0.389759	0.361108	0.477877	0.350393	0.364291	0.591932	0.616441	0.614047	0.540604	0.209268				0.477087	0.0514623	0.201938	0.36686	0.427624	0.348222	0.383389	0.381638	0.508468	0.552641	0.554439
261	0.739938	0.746885	0.896471	0.749334	0.746083	0.657441	0.612527	0.638219	0.683609	0.83315	0.712162	0.719611	0.675414	0.691311	0.760666	0.673894	0.673358	0.737789	0.758427	0.752359	0.684925	0.817474	0.800222	0.624799	0.660099	0.624256	0.592321	0.691743	0.575745	0.573916	0.795244	0.827283	0.809251	0.717921	0.400957				0.575844	0.0684666	0.340337	0.526846	0.584647	0.512364	0.564779	0.569051	0.702078	0.760399	0.771414
262	0.696174	0.69542	0.848093	0.706246	0.702678	0.615433	0.572912	0.599293	0.637368	0.79233	0.676878	0.682712	0.637178	0.658009	0.731753	0.637535	0.63398	0.704515	0.729304	0.716421	0.653204	0.79044	0.769335	0.59901	0.646921	0.615698	0.577812	0.680258	0.554867	0.564218	0.773056	0.789761	0.795885	0.700098	0.363321				0.615088	0.0804786	0.358232	0.509048	0.561272	0.508922	0.56039	0.554042	0.688672	0.74908	0.76332
263	0.610774	0.623165	0.758608	0.611971	0.606839	0.516373	0.473606	0.489982	0.566136	0.705292	0.60242	0.593736	0.555217	0.578971	0.655263	0.531219	0.52572	0.604464	0.634799	0.613613	0.561147	0.705511	0.67218	0.51371	0.57938	0.553251	0.519175	0.619315	0.481942	0.506513	0.715716	0.713299	0.740797	0.649386	0.317983				0.593947	0.0574391	0.336557	0.475818	0.52482	0.459534	0.505641	0.495653	0.631491	0.695209	0.704989
264	0.486293	0.501141	0.624741	0.470444	0.472586	0.391077	0.33631	0.343964	0.407637	0.558634	0.443608	0.428948	0.395161	0.414929	0.476446	0.370677	0.378251	0.44588	0.466695	0.475415	0.420228	0.554325	0.510766	0.353595	0.417565	0.383745	0.380963	0.475922	0.330118	0.353474	0.597676	0.589533	0.601996	0.525987	0.243521				0.45022	0.0741772	0.19474	0.364469	0.408749	0.300478	0.341267	0.342945	0.469437	0.528364	0.531999
265	0.467666	0.457063	0.587122	0.44587	0.447916	0.364963	0.313172	0.32954	0.342936	0.510903	0.396411	0.387155	0.336267	0.358685	0.424218	0.335802	0.340689	0.412033	0.432988	0.445999	0.384449	0.524433	0.479198	0.305655	0.372403	0.345831	0.348149	0.435326	0.297289	0.323731	0.567326	0.556953	0.574966	0.498751	0.219827				0.443238	0.0804609	0.18556	0.346712	0.393602	0.293687	0.327702	0.32563	0.461928	0.522022	0.51699
266	0.420038	0.398615	0.53195	0.404728	0.397806	0.309949	0.274187	0.29288	0.310161	0.476678	0.38888	0.372534	0.314451	0.352413	0.43824	0.319331	0.31467	0.410716	0.448197	0.434563	0.385033	0.548446	0.500519	0.329461	0.421025	0.415878	0.402735	0.486033	0.347025	0.398172	0.610821	0.57994	0.642271	0.559316	0.244556				0.580034	0.0430781	0.314868	0.424491	0.472894	0.405418	0.431591	0.412085	0.563136	0.629015	0.617857
267	0.292962	0.280199	0.373827	0.229456	0.231619	0.140908	0.078361	0.078278	0.113004	0.263089	0.162137	0.126798	0.0779695	0.100104	0.162884	0.0340141	0.0328468	0.110338	0.133796	0.137294	0.089514	0.233703	0.157842	0.0064948	0.105822	0.0857887	0.0942729	0.175675	0.0100785	0.0650624	0.299323	0.245907	0.310823	0.238328	0.0364256				0.27344	0.264324	0.00218866	0.114562	0.151217	0.0489202	0.0719203	0.0568973	0.194505	0.262916	0.252781
268	0.433467	0.397792	0.504621	0.378548	0.375807	0.284671	0.236061	0.246912	0.229287	0.397115	0.303304	0.273463	0.200337	0.226863	0.296972	0.188684	0.181526	0.266236	0.288003	0.293466	0.233195	0.387711	0.303273	0.115485	0.214	0.198256	0.208784	0.273213	0.128931	0.170515	0.406385	0.366103	0.417189	0.333939	0.0901865				0.302212	0.202159	0.0744632	0.213076	0.246829	0.138897	0.169742	0.15675	0.304314	0.389867	0.375053
269	0.330663	0.310587	0.422939	0.281839	0.298838	0.23231	0.162924	0.168659	0.150872	0.339082	0.214757	0.194919	0.152971	0.17266	0.217381	0.148412	0.167846	0.225847	0.237002	0.288338	0.231099	0.355422	0.284723	0.134442	0.21956	0.187938	0.233465	0.314169	0.140471	0.188786	0.458218	0.403323	0.4454	0.387154	0.145579				0.417655	0.137803	0.118535	0.252775	0.28259	0.156323	0.179237	0.177633	0.297745	0.349622	0.343611
270	0.433996	0.42265	0.531627	0.394411	0.410254	0.354692	0.293377	0.288095	0.296768	0.484794	0.380719	0.345299	0.314137	0.344755	0.39404	0.297552	0.316148	0.384979	0.403715	0.445316	0.400415	0.530274	0.442346	0.30866	0.415651	0.388233	0.427524	0.502956	0.310812	0.37186	0.61955	0.539731	0.60894	0.539613	0.292412				0.583836	0.0165912	0.291885	0.39723	0.410323	0.294971	0.332123	0.325067	0.434895	0.496918	0.50897
271	0.522501	0.499352	0.601107	0.475477	0.484474	0.425902	0.374567	0.367682	0.356769	0.54496	0.455715	0.410048	0.362468	0.396696	0.449313	0.348365	0.360465	0.437567	0.453651	0.491163	0.443814	0.582395	0.472838	0.319003	0.435801	0.411725	0.454747	0.51264	0.330961	0.386193	0.634091	0.553579	0.620819	0.543707	0.338191				0.53486	0.00436735	0.290364	0.413974	0.41751	0.2833	0.328354	0.322829	0.435236	0.518549	0.527536
272	0.611703	0.571127	0.683916	0.566208	0.576656	0.521925	0.471184	0.472479	0.410492	0.617041	0.518449	0.481918	0.421182	0.453291	0.500674	0.431472	0.444597	0.515829	0.52408	0.575218	0.516783	0.650664	0.537424	0.364154	0.473686	0.445195	0.498566	0.547321	0.372397	0.41554	0.671307	0.596654	0.648097	0.566751	0.383624				0.524214	0.00432026	0.286151	0.426555	0.424378	0.286423	0.339818	0.339867	0.450996	0.539175	0.552167
273	0.625967	0.549816	0.656621	0.558127	0.555043	0.480026	0.437723	0.445783	0.340109	0.540481	0.461592	0.414337	0.319041	0.356515	0.418751	0.316405	0.304832	0.395799	0.405698	0.413756	0.358384	0.512184	0.36946	0.179572	0.319279	0.302747	0.318211	0.365139	0.197667	0.246825	0.456599	0.375841	0.467255	0.360514	0.145271				0.381999	0.153433	0.150314	0.225893	0.216969	0.139879	0.192637	0.159475	0.291763	0.411121	0.422046
274	0.519285	0.451249	0.539742	0.439516	0.435509	0.366948	0.324397	0.316232	0.240124	0.43263	0.367332	0.299271	0.219537	0.262739	0.319458	0.193975	0.190922	0.284768	0.294115	0.306707	0.269191	0.420655	0.264016	0.105273	0.26077	0.248509	0.276319	0.32101	0.140674	0.20775	0.417972	0.315186	0.428039	0.332481	0.135088				0.392029	0.132447	0.164221	0.222391	0.206758	0.111571	0.15566	0.120799	0.240514	0.357701	0.363645
275	0.515839	0.472914	0.555501	0.440875	0.459955	0.410669	0.349854	0.339739	0.279872	0.478297	0.386836	0.335034	0.282144	0.308479	0.342906	0.271376	0.28651	0.34868	0.353353	0.421361	0.370182	0.49207	0.352994	0.207737	0.332353	0.304401	0.385209	0.420268	0.221803	0.285578	0.545425	0.433273	0.509375	0.44266	0.301431				0.458378	0.056535	0.219612	0.333963	0.317077	0.152029	0.194801	0.196108	0.288113	0.37587	0.386425
276	0.570268	0.502948	0.595845	0.494183	0.509702	0.459454	0.403488	0.403005	0.285769	0.49897	0.405278	0.359494	0.28664	0.313643	0.347066	0.297296	0.308361	0.37139	0.368915	0.438317	0.380353	0.503684	0.353597	0.188636	0.315403	0.288423	0.371016	0.39648	0.208365	0.2647	0.518837	0.409975	0.485569	0.409727	0.281721				0.424611	0.0904561	0.190813	0.298121	0.273648	0.122668	0.169714	0.164685	0.261348	0.363761	0.373314
277	0.752902	0.686654	0.748393	0.64347	0.675274	0.620392	0.540899	0.537366	0.43078	0.619804	0.518621	0.471164	0.403419	0.405493	0.423267	0.371665	0.366459	0.400534	0.394956	0.471151	0.40086	0.491444	0.322062	0.187882	0.307515	0.2574	0.345535	0.368024	0.129959	0.18785	0.434556	0.290121	0.367514	0.291775	0.161671				0.330381	0.220737	0.0603331	0.144905	0.104031	0.0508638	0.0132846	0.0225882	0.0809898	0.16936	0.223396
278	0.734946	0.661295	0.742084	0.654654	0.658484	0.617978	0.577889	0.559978	0.444047	0.654933	0.594075	0.516301	0.440895	0.483266	0.517365	0.42872	0.435612	0.514303	0.507725	0.555635	0.517623	0.645994	0.453557	0.303782	0.462989	0.438705	0.504358	0.52031	0.32519	0.383883	0.603014	0.47437	0.57596	0.480485	0.381477				0.478861	0.0132661	0.290561	0.365365	0.307816	0.166479	0.23832	0.223174	0.295351	0.428007	0.46257
279	0.660953	0.580375	0.649467	0.557318	0.574647	0.521751	0.46201	0.457412	0.319752	0.52178	0.434715	0.380139	0.297367	0.313006	0.336426	0.293652	0.294929	0.346142	0.335749	0.412994	0.348298	0.455974	0.279153	0.116989	0.242165	0.206856	0.306873	0.308971	0.111993	0.162589	0.41559	0.287916	0.357537	0.282979	0.22459				0.261067	0.209696	0.0669724	0.182693	0.135149	0.0514427	0.00818257	0.016919	0.0843151	0.200778	0.224215
280	0.662522	0.578047	0.648968	0.56145	0.589643	0.549502	0.484075	0.48371	0.321465	0.534276	0.43964	0.394233	0.318226	0.329824	0.342363	0.331729	0.339493	0.378271	0.36566	0.465814	0.400286	0.494041	0.316877	0.170931	0.293606	0.258687	0.383436	0.376966	0.164342	0.228273	0.482924	0.332897	0.412865	0.349489	0.295617				0.390483	0.103104	0.160085	0.250678	0.198688	0.0141565	0.0657983	0.0796345	0.133594	0.233316	0.262106
281	0.672563	0.590855	0.673097	0.597396	0.609465	0.594259	0.556326	0.535686	0.3795	0.612098	0.552851	0.474307	0.408943	0.457271	0.475245	0.424184	0.447995	0.520601	0.505625	0.583125	0.558096	0.67487	0.468144	0.342279	0.512649	0.497615	0.594946	0.594496	0.397418	0.473582	0.686554	0.533301	0.656003	0.573321	0.520166				0.63473	0.160681	0.446965	0.485829	0.409252	0.26502	0.326966	0.309364	0.35896	0.489518	0.519761
282	0.711163	0.625679	0.688596	0.611361	0.632036	0.604931	0.553387	0.538419	0.378	0.593167	0.521739	0.454469	0.382355	0.407698	0.418141	0.390996	0.404603	0.454918	0.438147	0.533225	0.48664	0.583486	0.384168	0.250933	0.393313	0.366395	0.489932	0.472799	0.270428	0.337778	0.573166	0.414633	0.508148	0.441859	0.440839				0.459142	0.0266318	0.290059	0.367922	0.293442	0.0988396	0.158106	0.169259	0.204259	0.320111	0.350914
293	0.951943	0.817169	0.886466	0.841775	0.875672	0.856106	0.797151	0.81546	0.512953	0.737755	0.644928	0.621357	0.516794	0.511046	0.497145	0.585476	0.581407	0.590409	0.556518	0.680578	0.605108	0.651889	0.439649	0.301151	0.40166	0.370046	0.54082	0.457942	0.239718	0.304883	0.492579	0.283363	0.367229	0.304171	0.365206				0.41991	0.0296613	0.18757	0.196094	0.0898151	0.0717278	0.00354838	0.0492806	0.0140996	0.101644	0.203934
294	0.727297	0.58833	0.653491	0.602101	0.631362	0.583597	0.519605	0.545743	0.261533	0.472579	0.375847	0.355177	0.235695	0.22301	0.224554	0.287634	0.269434	0.28379	0.257696	0.3696	0.277625	0.341209	0.139999	0.0224888	0.0764425	0.0379895	0.200298	0.141462	0.0695287	0.0101623	0.21905	0.0385669	0.123922	0.0646538	0.0857778				0.210502	0.253513	0.034406	0.0103184	0.0867816	0.255048	0.221763	0.202656	0.189394	0.0789199	0.0393489
295	0.684554	0.567302	0.60288	0.535327	0.612517	0.558604	0.44565	0.496198	0.246594	0.426898	0.28634	0.319362	0.228207	0.159788	0.144664	0.287193	0.256687	0.202365	0.205485	0.389443	0.245298	0.252777	0.122973	0.00327155	0.0305865	0.0219305	0.237045	0.15695	0.148746	0.0294603	0.258489	0.00195933	0.0812099	0.0978088	0.043587				0.399389	0.139224	0.00571066	0.0288438	0.0272047	0.172659	0.215439	0.127995	0.0912413	0.152338	0.126924
296	0.786629	0.601611	0.678606	0.658264	0.667888	0.600118	0.5555	0.604802	0.231717	0.438096	0.357639	0.34812	0.172607	0.156384	0.176178	0.249442	0.192722	0.220644	0.189853	0.250992	0.138708	0.214071	0.0217279	0.240019	0.141739	0.183264	0.0593413	0.138163	0.326696	0.299623	0.119201	0.284645	0.175968	0.274828	0.261599				0.00395636	0.465224	0.259039	0.345716	0.430201	0.484529	0.490437	0.539676	0.520926	0.337379	0.312136
297	0.641686	0.518084	0.631728	0.570612	0.590258	0.57822	0.531184	0.54714	0.246245	0.506727	0.394138	0.373737	0.276877	0.29796	0.283935	0.378081	0.413214	0.445194	0.390731	0.525689	0.475833	0.547952	0.359811	0.19685	0.311214	0.282219	0.45463	0.41734	0.272359	0.316689	0.555573	0.428345	0.508185	0.434213	0.474267				0.540895	0.0525353	0.303274	0.349751	0.242641	0.116294	0.169003	0.157631	0.188267	0.360224	0.34776
298	0.627716	0.499802	0.607235	0.543115	0.564079	0.523475	0.467957	0.499766	0.212087	0.451887	0.335895	0.329213	0.213345	0.219356	0.226382	0.303367	0.308846	0.34034	0.306886	0.418513	0.334786	0.422297	0.254184	0.0515222	0.151966	0.117798	0.262042	0.236103	0.0705007	0.108738	0.362554	0.241471	0.3142	0.233592	0.181921				0.363742	0.173977	0.0752876	0.124865	0.0656779	0.0332488	0.00202496	0.0256015	0.0691911	0.211343	0.202588
299	0.681838	0.537966	0.647692	0.595445	0.616059	0.573878	0.519347	0.562495	0.234999	0.472951	0.355997	0.361422	0.230206	0.229009	0.235315	0.336779	0.329199	0.355328	0.320099	0.424607	0.33033	0.412802	0.236197	0.0168005	0.115142	0.0793938	0.220959	0.182666	0.00536305	0.0427577	0.268154	0.135062	0.229796	0.130129	0.0429265				0.354458	0.208382	0.0250493	0.00165427	0.0655944	0.0775126	0.0609054	0.119772	0.015258	0.143155	0.152653
300	0.676886	0.520546	0.632959	0.590344	0.606971	0.561511	0.513421	0.56324	0.208849	0.44352	0.328387	0.34327	0.198812	0.192745	0.200859	0.325147	0.315445	0.33848	0.297006	0.400302	0.302499	0.37527	0.213752	0.0260288	0.0409102	0.00705177	0.157711	0.0927213	0.0291805	0.0253143	0.202787	0.0998214	0.166325	0.0620195	0.0568026				0.286145	0.239006	0.0251274	0.0428323	0.125277	0.119415	0.123988	0.205423	0.0698182	0.190268	0.118772
301	0.69167	0.544114	0.660095	0.60727	0.622846	0.563164	0.512758	0.566704	0.2415	0.46959	0.350333	0.370386	0.222807	0.21476	0.238002	0.344189	0.327765	0.3561	0.327981	0.420161	0.306144	0.395236	0.265019	0.00646295	0.0449039	0.0133988	0.132383	0.0823429	0.018491	0.0326116	0.215657	0.152721	0.1754	0.0698587	0.0345336				0.152935	0.37644	0.131779	0.0492517	0.0932128	0.122758	0.104007	0.148354	0.0715013	0.232295	0.164569
302	0.664133	0.519256	0.639713	0.583069	0.602217	0.535891	0.47927	0.542947	0.222743	0.445498	0.316937	0.351464	0.201981	0.187658	0.217425	0.329816	0.305163	0.329497	0.310863	0.397542	0.267972	0.361538	0.260411	0.0335203	0.0118219	0.0191822	0.074987	0.0510715	0.0606101	0.0669977	0.18104	0.123126	0.162826	0.0542777	0.0980156				0.233556	0.333742	0.110779	0.0815585	0.0753975	0.0325236	0.0444361	0.102028	0.158554	0.245743	0.194413
303	0.736144	0.591567	0.711626	0.656909	0.686202	0.635138	0.569767	0.636481	0.294068	0.517283	0.371912	0.42388	0.286316	0.256596	0.264551	0.434271	0.422456	0.41404	0.382262	0.507137	0.373462	0.41776	0.344316	0.0744594	0.0601328	0.00625369	0.168776	0.104556	0.0294275	0.0649176	0.220795	0.137169	0.132629	0.030913	0.0960541				0.281778	0.3235	0.157591	0.163571	0.166518	0.0698626	0.101589	0.156315	0.110934	0.145957	0.125789
304	0.732684	0.595472	0.722207	0.660965	0.687075	0.640336	0.578258	0.638087	0.307195	0.536573	0.388218	0.435127	0.305413	0.282157	0.28602	0.451259	0.455483	0.448908	0.406934	0.536465	0.417944	0.457038	0.3866	0.138462	0.114245	0.061136	0.218473	0.164595	0.0852706	0.031796	0.333891	0.299844	0.227641	0.151903	0.116856				0.21842	0.392819	0.2055	0.0648447	0.0907787	0.0586719	0.0557638	0.023435	0.19386	0.202042	0.165904
305	0.579562	0.460103	0.594846	0.516405	0.542974	0.492078	0.424216	0.481921	0.189155	0.41857	0.257852	0.306	0.189006	0.169008	0.175373	0.32273	0.33647	0.330991	0.289553	0.417403	0.301498	0.346785	0.29725	0.0571833	0.0363392	0.0253862	0.0946816	0.107786	0.0327265	0.0229108	0.310489	0.321915	0.240762	0.190296	0.0802641				0.251838	0.349205	0.164269	0.00386448	0.0374213	0.00603034	0.00783469	0.00662604	0.166348	0.178766	0.134873
317	0.440604	0.351079	0.520684	0.4139	0.429723	0.35641	0.281817	0.35296	0.151363	0.355443	0.177042	0.247435	0.154536	0.147937	0.190154	0.259358	0.258581	0.268453	0.256324	0.275155	0.178898	0.257079	0.30796	0.143601	0.131066	0.102575	0.0224092	0.185625	0.0921891	0.101945	0.246101	0.298056	0.321583	0.239499	0.213263				0.466873	0.12596	0.0578579	0.0504755	0.124626	0.226199	0.227578	0.187212	0.315253	0.32027	0.318002
318	0.498441	0.431474	0.609321	0.477643	0.498293	0.459118	0.365661	0.412607	0.209661	0.429127	0.205158	0.268671	0.2125	0.192014	0.171516	0.28517	0.336893	0.287691	0.208559	0.279627	0.200366	0.188988	0.213138	0.0954853	0.0361706	0.0693856	0.168131	0.0607937	0.0172777	0.0972289	0.081363	0.226012	0.150061	0.0589992	0.342654				0.220732	0.382171	0.213399	0.194368	0.145541	0.0344011	0.0152678	0.0608498	0.0273466	0.0373213	0.0522792
319	0.587774	0.492843	0.661445	0.563047	0.575354	0.488164	0.423927	0.505834	0.301888	0.488614	0.321466	0.403705	0.294098	0.275541	0.330005	0.416789	0.403598	0.412244	0.408866	0.433018	0.309838	0.390742	0.457029	0.239775	0.177151	0.155622	0.0836658	0.192967	0.161488	0.132231	0.283563	0.390533	0.341359	0.253257	0.180127				0.338989	0.184889	0.00987387	0.0593053	0.166114	0.259998	0.261368	0.248348	0.399738	0.404556	0.388886
320	0.541086	0.469639	0.645412	0.528212	0.537458	0.451369	0.383035	0.455121	0.306149	0.484754	0.310454	0.384948	0.300443	0.287488	0.338101	0.386833	0.38123	0.391895	0.38571	0.386785	0.287923	0.368437	0.429154	0.254546	0.209628	0.176438	0.0862325	0.226084	0.172	0.147132	0.291094	0.392539	0.359754	0.270304	0.173721				0.360588	0.18274	0.00693515	0.0672635	0.159226	0.244119	0.25647	0.232749	0.370016	0.382635	0.378996
321	0.511407	0.443427	0.618698	0.496494	0.508505	0.420634	0.341882	0.419899	0.270884	0.428745	0.239362	0.329998	0.250255	0.220643	0.261467	0.328588	0.32129	0.309658	0.294482	0.280177	0.182546	0.241022	0.325385	0.171947	0.0933039	0.0603089	0.053851	0.0909594	0.0717628	0.0334638	0.140389	0.281828	0.230249	0.148122	0.323173				0.267235	0.249351	0.0942376	0.0464945	0.0625767	0.172538	0.173728	0.149906	0.282478	0.280684	0.269768
322	0.518837	0.444098	0.608201	0.490407	0.508461	0.415745	0.333189	0.416157	0.247691	0.403629	0.212962	0.309668	0.216646	0.175241	0.215797	0.308014	0.295211	0.276099	0.262747	0.271816	0.15146	0.205372	0.291061	0.104117	0.00391401	0.0271459	0.118561	0.00367584	0.000322164	0.0524674	0.0745744	0.236489	0.146228	0.0730196	0.36345				0.141519	0.334299	0.200623	0.110725	0.0169773	0.109889	0.0990792	0.0926978	0.236159	0.225937	0.200483
323	0.513271	0.453381	0.611803	0.481208	0.49852	0.401553	0.316576	0.389353	0.25713	0.411995	0.222467	0.30413	0.217918	0.180886	0.222293	0.283106	0.27064	0.262407	0.251715	0.261513	0.145242	0.212506	0.274584	0.0799176	0.00625973	0.0341818	0.111238	0.00553577	0.0194272	0.0693862	0.0937691	0.233301	0.146065	0.0692098	0.32991				0.0732434	0.410698	0.24726	0.122197	0.00698617	0.0465031	0.0470293	0.0439972	0.192	0.196182	0.175684
324	0.658735	0.616537	0.789851	0.648722	0.656974	0.564602	0.484572	0.549755	0.457851	0.604047	0.41304	0.489074	0.423041	0.392204	0.429454	0.462616	0.455916	0.447839	0.431073	0.416429	0.318004	0.379375	0.441232	0.276517	0.204497	0.152516	0.0444646	0.179419	0.146639	0.0868115	0.217394	0.362601	0.280369	0.182731	0.249384				0.152401	0.33833	0.150434	0.0399141	0.0621627	0.139249	0.165506	0.15436	0.288818	0.30719	0.311315
334	0.690056	0.629571	0.780686	0.657939	0.669502	0.583524	0.519166	0.571616	0.439829	0.62889	0.469197	0.51271	0.420002	0.408264	0.454176	0.49266	0.493389	0.516575	0.508964	0.560972	0.44717	0.542058	0.539417	0.306089	0.279393	0.232921	0.240099	0.305064	0.244728	0.194424	0.44924	0.534971	0.428668	0.352837	0.12332				0.110798	0.324722	0.0982673	0.162524	0.24338	0.167528	0.201678	0.233416	0.375647	0.414288	0.400093
335	0.57178	0.507632	0.660665	0.538681	0.555559	0.488726	0.420186	0.465724	0.304378	0.515355	0.345373	0.385432	0.300626	0.291993	0.317955	0.385588	0.407951	0.420068	0.394395	0.48013	0.376275	0.450877	0.437075	0.219899	0.194354	0.134047	0.175098	0.24744	0.183576	0.123782	0.419691	0.507035	0.38315	0.327328	0.156812				0.105056	0.356384	0.142228	0.13584	0.197962	0.0930801	0.123042	0.157467	0.272934	0.303858	0.288029
336	0.584875	0.499604	0.658004	0.554525	0.563093	0.48392	0.429484	0.488257	0.302971	0.511674	0.361734	0.406766	0.299588	0.299682	0.349725	0.405917	0.409002	0.443611	0.436064	0.491752	0.383125	0.488312	0.487065	0.242133	0.23168	0.202041	0.214062	0.279097	0.228908	0.196108	0.448775	0.520927	0.447982	0.375573	0.117409				0.265127	0.220388	0.00168984	0.202318	0.287085	0.246566	0.259426	0.274241	0.431449	0.459502	0.428794
337	0.651434	0.594376	0.745398	0.619705	0.634313	0.560768	0.492787	0.535704	0.405785	0.608631	0.446933	0.479686	0.398444	0.394104	0.431504	0.462371	0.472132	0.495942	0.484353	0.547141	0.442327	0.534426	0.515846	0.299621	0.298142	0.243051	0.257807	0.3408	0.239964	0.20511	0.472281	0.520169	0.449156	0.368927	0.117711				0.224148	0.298773	0.0500463	0.159579	0.213882	0.146148	0.189739	0.206915	0.337314	0.381102	0.384607
338	0.701839	0.637586	0.783509	0.666738	0.678754	0.608702	0.549432	0.587697	0.445335	0.657089	0.510576	0.531229	0.442435	0.446311	0.487027	0.512878	0.522604	0.558673	0.549556	0.618649	0.516509	0.620996	0.578976	0.349567	0.366942	0.320036	0.360468	0.416207	0.313589	0.287174	0.56632	0.592241	0.529704	0.450976	0.255885				0.257364	0.23978	0.0234601	0.263049	0.308421	0.198814	0.248108	0.275244	0.408547	0.464115	0.462337
339	0.730416	0.659334	0.808111	0.694686	0.712006	0.657758	0.594033	0.630078	0.453389	0.681982	0.524781	0.547617	0.462806	0.464942	0.488057	0.547706	0.570531	0.591946	0.568625	0.667294	0.564581	0.647374	0.600994	0.379003	0.387994	0.326899	0.395211	0.447997	0.33321	0.296505	0.59959	0.615448	0.536752	0.462273	0.293252				0.270096	0.269435	0.00115062	0.244409	0.271151	0.157022	0.218924	0.255439	0.366777	0.415626	0.430226
340	0.73102	0.648748	0.786887	0.679133	0.697278	0.622705	0.554274	0.601542	0.423146	0.632763	0.481205	0.510482	0.40781	0.400015	0.438939	0.480078	0.472496	0.498226	0.490857	0.558311	0.437007	0.534745	0.487805	0.242897	0.26376	0.212109	0.238748	0.29601	0.169863	0.147627	0.405188	0.407713	0.374381	0.275437	0.0328818				0.191968	0.366825	0.0971106	0.064509	0.0979813	0.0526672	0.103214	0.107467	0.255632	0.320628	0.332768
341	0.615253	0.551574	0.674175	0.552611	0.575609	0.50039	0.422973	0.45721	0.325147	0.525767	0.374491	0.388772	0.303448	0.295833	0.329719	0.340667	0.33972	0.366801	0.359662	0.429678	0.323811	0.422385	0.356138	0.14366	0.185158	0.130449	0.173926	0.2392	0.0886116	0.0855379	0.362781	0.342695	0.326683	0.246902	0.0296733				0.187896	0.369955	0.105684	0.0634515	0.0903636	0.00785192	0.0354033	0.0421932	0.172346	0.236665	0.244073
342	0.806858	0.728656	0.856483	0.750742	0.768708	0.706708	0.643436	0.674647	0.503297	0.723084	0.58637	0.592076	0.496403	0.499015	0.531425	0.556933	0.558198	0.592771	0.582569	0.663449	0.556352	0.658422	0.569824	0.337561	0.386827	0.334597	0.400953	0.430413	0.279916	0.269756	0.545695	0.50808	0.485791	0.390948	0.2309				0.244752	0.301636	0.00603427	0.19065	0.191166	0.0735816	0.148946	0.170501	0.29198	0.378612	0.405324
343	0.664752	0.577615	0.716649	0.618108	0.634815	0.587993	0.529716	0.560351	0.356309	0.597739	0.460013	0.464981	0.373221	0.38851	0.413176	0.45781	0.475936	0.515026	0.497265	0.593413	0.501249	0.603864	0.515997	0.294309	0.359933	0.315483	0.398362	0.435337	0.281746	0.289227	0.568444	0.516505	0.522287	0.434619	0.252721				0.404963	0.181659	0.0983907	0.24136	0.236241	0.150935	0.208494	0.212629	0.33351	0.405845	0.426502
344	0.690057	0.595705	0.73538	0.643161	0.649464	0.585069	0.536745	0.571819	0.381096	0.611435	0.495082	0.492901	0.384106	0.408938	0.460863	0.453492	0.445304	0.51172	0.514395	0.555926	0.464124	0.600457	0.502694	0.264387	0.361202	0.335061	0.356158	0.404705	0.253289	0.275024	0.494541	0.443513	0.495118	0.380167	0.132041				0.399725	0.177871	0.115576	0.196514	0.197129	0.171446	0.22776	0.199041	0.344773	0.442724	0.46483
345	0.660139	0.578241	0.685847	0.582628	0.602795	0.534357	0.46578	0.490643	0.333888	0.543586	0.420654	0.409121	0.314174	0.319953	0.355877	0.34055	0.332223	0.377272	0.373487	0.436015	0.344162	0.457466	0.334956	0.133315	0.22801	0.18538	0.242418	0.283948	0.100669	0.130236	0.382387	0.302961	0.350682	0.259584	0.0679171				0.279294	0.288753	0.00664945	0.0976458	0.0901787	0.00487232	0.0455897	0.033871	0.153221	0.24799	0.26774
346	0.491526	0.407751	0.511577	0.41243	0.443705	0.39765	0.324084	0.344886	0.161042	0.389434	0.25805	0.24816	0.169963	0.175927	0.188968	0.221135	0.239184	0.268969	0.253279	0.368816	0.287756	0.381393	0.255826	0.085397	0.179563	0.140019	0.266491	0.290865	0.0955501	0.150024	0.439726	0.327937	0.385702	0.332039	0.195496				0.43226	0.135367	0.111769	0.212284	0.2021	0.0601105	0.0813771	0.0836598	0.184684	0.249803	0.247756
347	0.50645	0.40452	0.510167	0.422889	0.450788	0.400119	0.329449	0.358099	0.140863	0.371262	0.2456	0.236984	0.143365	0.151369	0.169112	0.198232	0.203752	0.240305	0.226441	0.32486	0.243278	0.345881	0.205168	0.0318222	0.147714	0.117692	0.222937	0.250854	0.0474417	0.11722	0.368285	0.244113	0.340632	0.270745	0.0838608				0.455997	0.130621	0.116681	0.145823	0.134101	0.0635748	0.0779349	0.0517408	0.168445	0.24115	0.24303
348	0.420201	0.315909	0.416181	0.32973	0.346464	0.280609	0.217374	0.240656	0.0521458	0.272129	0.168907	0.140023	0.0413155	0.0654717	0.10443	0.0644845	0.0615611	0.128727	0.127569	0.17799	0.120531	0.254561	0.104529	0.0540199	0.0958027	0.0891661	0.147728	0.191605	0.00101779	0.0896605	0.300701	0.178526	0.314103	0.23626	0.00253132				0.457797	0.113103	0.141806	0.136593	0.137649	0.0959741	0.102084	0.055098	0.193121	0.276165	0.263661
349	0.364162	0.271973	0.362972	0.272712	0.287794	0.230621	0.171732	0.179706	0.0226633	0.240846	0.149038	0.103704	0.0209267	0.0517563	0.0869935	0.0348288	0.0439648	0.114245	0.112735	0.174693	0.128529	0.261612	0.104963	0.041058	0.111122	0.10509	0.182431	0.215456	0.0238728	0.116072	0.343179	0.214059	0.345543	0.276095	0.0900451				0.461519	0.081494	0.177595	0.19674	0.187937	0.100867	0.109025	0.0710474	0.195738	0.287395	0.268505
357	0.280736	0.207675	0.341816	0.227401	0.238402	0.149695	0.0830268	0.120431	0.0240044	0.223721	0.106339	0.107296	0.0321485	0.0684095	0.147786	0.0502254	0.0406853	0.130799	0.169305	0.146346	0.108514	0.261383	0.223258	0.0956565	0.206614	0.215694	0.192688	0.294687	0.122297	0.217272	0.377262	0.301661	0.431709	0.357858	0.0331054				0.616408	0.0127284	0.248913	0.227879	0.276564	0.298949	0.299871	0.254579	0.399463	0.433751	0.428301
358	0.417247	0.349519	0.49865	0.375465	0.395729	0.32049	0.238573	0.283601	0.156867	0.364349	0.204014	0.231344	0.162017	0.172818	0.222109	0.192245	0.186318	0.230816	0.23838	0.242709	0.177656	0.287016	0.262327	0.13051	0.203851	0.175053	0.134706	0.270733	0.100721	0.154218	0.322087	0.285806	0.370937	0.287708	0.111542				0.512964	0.107691	0.122555	0.112394	0.154807	0.197345	0.212099	0.167862	0.292633	0.321931	0.335084
359	0.5199	0.427507	0.581859	0.484952	0.489369	0.405854	0.355054	0.408853	0.240156	0.454833	0.330994	0.354162	0.244844	0.269981	0.345551	0.322486	0.300029	0.374927	0.398684	0.397144	0.308193	0.457131	0.423567	0.204135	0.286049	0.280427	0.243575	0.336374	0.202652	0.246395	0.417551	0.39094	0.467837	0.364096	0.00811515				0.508655	0.0787698	0.175025	0.197164	0.242323	0.28227	0.305078	0.262311	0.421523	0.478109	0.482527
360	0.316952	0.268527	0.423144	0.295245	0.304322	0.233591	0.17282	0.205399	0.127639	0.336412	0.199862	0.211576	0.155216	0.185499	0.245909	0.198618	0.213291	0.27939	0.29795	0.319542	0.263513	0.394454	0.377387	0.228414	0.297936	0.28033	0.274629	0.389072	0.235426	0.287555	0.501397	0.471898	0.531517	0.461089	0.100836				0.602129	0.000996569	0.241272	0.29823	0.347356	0.331134	0.345234	0.319947	0.452295	0.481953	0.480584
361	0.580366	0.532638	0.714407	0.589027	0.589626	0.51786	0.467035	0.510328	0.434535	0.636525	0.493943	0.524074	0.466998	0.490389	0.554281	0.515833	0.515591	0.569451	0.581649	0.574278	0.504565	0.619513	0.617402	0.461497	0.501485	0.463557	0.394682	0.529439	0.397322	0.406447	0.570574	0.588753	0.621599	0.513222	0.109512				0.583342	0.0120625	0.248487	0.297386	0.33875	0.381016	0.42777	0.391284	0.5141	0.564471	0.593913
362	0.447088	0.383322	0.549228	0.427813	0.437161	0.358641	0.294496	0.347229	0.220795	0.42239	0.264845	0.306551	0.229217	0.238905	0.293267	0.299396	0.303317	0.343991	0.34759	0.367912	0.284364	0.393884	0.408312	0.229119	0.249335	0.219075	0.180709	0.309389	0.197854	0.208327	0.40882	0.438767	0.448548	0.366912	0.0196406				0.46418	0.119851	0.105007	0.176385	0.241003	0.265286	0.282363	0.258678	0.3956	0.420896	0.420041
363	0.481446	0.438332	0.579652	0.438226	0.458598	0.376387	0.291025	0.330748	0.242717	0.427176	0.254665	0.285993	0.220119	0.209972	0.246396	0.242337	0.245767	0.267383	0.260098	0.297114	0.205757	0.298342	0.282204	0.104038	0.124637	0.0705981	0.0542891	0.176035	0.0445269	0.0400603	0.279299	0.303815	0.288916	0.211759	0.116719				0.240042	0.339096	0.104026	0.0158604	0.0712233	0.0422489	0.0672553	0.0562386	0.188147	0.22325	0.226146
364	0.766034	0.741334	0.892136	0.741097	0.753898	0.665392	0.584247	0.62091	0.581824	0.744439	0.573643	0.603779	0.546613	0.531918	0.573047	0.536076	0.524977	0.546257	0.539622	0.539352	0.4472	0.537537	0.519116	0.343029	0.356141	0.290102	0.223752	0.351204	0.223942	0.195584	0.388058	0.433572	0.409806	0.296467	0.0663282				0.236477	0.3312	0.0618671	0.0579099	0.104429	0.109993	0.170814	0.155307	0.282289	0.341836	0.376331
365	0.689743	0.656142	0.825436	0.681744	0.689706	0.605758	0.533038	0.580245	0.515307	0.685967	0.511579	0.557515	0.499571	0.489423	0.532118	0.524127	0.523086	0.54059	0.531773	0.533528	0.443865	0.528662	0.5441	0.373566	0.359966	0.301039	0.225167	0.36149	0.264988	0.229167	0.409326	0.487218	0.445775	0.340227	0.0492795				0.298365	0.253638	0.010186	0.105236	0.169091	0.19951	0.247284	0.231767	0.359689	0.402142	0.424741
366	0.654368	0.619233	0.784697	0.639888	0.652258	0.577575	0.501122	0.544	0.457156	0.642415	0.460373	0.504223	0.445385	0.434119	0.464621	0.483837	0.497742	0.50619	0.486892	0.523647	0.428949	0.501889	0.512597	0.333957	0.308908	0.239861	0.198599	0.327387	0.233732	0.182928	0.407151	0.495208	0.415797	0.323844	0.0105649				0.219505	0.319884	0.0830354	0.0826084	0.143298	0.136771	0.184834	0.185648	0.30373	0.340442	0.359274
367	0.58219	0.541476	0.7075	0.578942	0.579533	0.488849	0.438654	0.488834	0.423706	0.600433	0.45871	0.496209	0.422776	0.43144	0.498441	0.479654	0.478927	0.529386	0.541759	0.550934	0.464501	0.586711	0.601263	0.402582	0.405705	0.377061	0.343525	0.444527	0.364768	0.351924	0.567925	0.631754	0.592829	0.510552	0.170775				0.424988	0.081482	0.154789	0.324392	0.404268	0.374651	0.403238	0.404207	0.549787	0.586532	0.577923
368	0.545469	0.512681	0.676762	0.542121	0.541963	0.438023	0.383322	0.440358	0.402894	0.55336	0.408355	0.456186	0.386438	0.385855	0.457934	0.427555	0.41571	0.462316	0.480337	0.464209	0.379112	0.499945	0.533447	0.347362	0.33844	0.31362	0.253462	0.364265	0.293993	0.282774	0.469826	0.546481	0.513144	0.430073	0.0466329				0.381412	0.1222	0.100748	0.24713	0.339852	0.337008	0.358493	0.353017	0.503638	0.534375	0.523219
369	0.588074	0.557218	0.726771	0.583816	0.588197	0.495981	0.429173	0.483819	0.423307	0.581529	0.41104	0.466548	0.403123	0.391518	0.440728	0.44521	0.447181	0.467256	0.46277	0.465944	0.376162	0.465566	0.505365	0.326808	0.287889	0.241478	0.17872	0.300782	0.245834	0.201391	0.393814	0.50944	0.428678	0.345432	0.0211337				0.244042	0.243557	0.0344777	0.135413	0.226388	0.2313	0.260248	0.261845	0.39535	0.42057	0.41791
370	0.508203	0.482931	0.655822	0.511734	0.515081	0.435383	0.375101	0.42035	0.360463	0.538029	0.371708	0.415822	0.35891	0.3598	0.404399	0.411679	0.432177	0.459502	0.450152	0.477718	0.397902	0.48998	0.517308	0.340286	0.312467	0.26292	0.233341	0.352904	0.295412	0.249535	0.484569	0.599273	0.502843	0.435436	0.129231				0.287042	0.187087	0.0200903	0.234354	0.31503	0.27096	0.299169	0.310069	0.429852	0.454	0.445654
371	0.628217	0.611065	0.775393	0.630055	0.630165	0.533902	0.476394	0.524874	0.50235	0.653884	0.499712	0.543017	0.483068	0.479242	0.538371	0.515611	0.516081	0.552222	0.558077	0.558858	0.473082	0.580194	0.607545	0.421768	0.399205	0.3586	0.310996	0.419161	0.355976	0.320557	0.530119	0.630186	0.55394	0.47332	0.137405				0.313124	0.15115	0.0709875	0.27631	0.365105	0.329877	0.363351	0.37348	0.510243	0.543863	0.538539
372	0.450476	0.432499	0.6063	0.462925	0.460158	0.362695	0.308961	0.365197	0.342132	0.487676	0.332749	0.387649	0.331376	0.329782	0.391873	0.377092	0.38171	0.417808	0.425283	0.416448	0.340456	0.445838	0.498457	0.329791	0.295248	0.263338	0.204687	0.325724	0.284617	0.251919	0.446599	0.569022	0.492365	0.424763	0.0613217				0.327748	0.132942	0.0589277	0.242494	0.343481	0.329199	0.344406	0.346643	0.481428	0.499355	0.480852
373	0.606898	0.584636	0.774996	0.637106	0.631752	0.550904	0.506002	0.55932	0.509728	0.679348	0.521354	0.575439	0.521441	0.528029	0.580767	0.589887	0.612737	0.644524	0.638056	0.650877	0.578323	0.671414	0.72178	0.553657	0.507514	0.464731	0.417904	0.539394	0.513424	0.456695	0.666458	0.815767	0.699833	0.633029	0.310176				0.448501	0.0182779	0.207175	0.430837	0.523011	0.498095	0.525861	0.537632	0.652353	0.671087	0.660554
374	0.557206	0.556812	0.734468	0.575945	0.57574	0.499714	0.439792	0.477713	0.459307	0.625359	0.453604	0.495273	0.455073	0.455015	0.492402	0.490211	0.519397	0.541387	0.525658	0.550181	0.47848	0.56129	0.592113	0.429488	0.390209	0.329666	0.295106	0.420847	0.373068	0.308835	0.544253	0.686142	0.559124	0.492801	0.209115				0.260158	0.171418	0.0283695	0.28099	0.359199	0.299346	0.338106	0.357326	0.462091	0.487504	0.486709
375	0.731801	0.735813	0.907166	0.748209	0.744999	0.652544	0.592358	0.636728	0.644565	0.781861	0.616165	0.662874	0.618811	0.609591	0.657389	0.634772	0.643019	0.666374	0.661575	0.656768	0.577048	0.666669	0.705159	0.537	0.492818	0.438635	0.375983	0.494997	0.446715	0.38739	0.585203	0.720113	0.609549	0.526335	0.190321				0.299266	0.132673	0.0790763	0.308172	0.398829	0.370144	0.414361	0.430427	0.552537	0.583736	0.588813
376	0.520433	0.515555	0.6871	0.529703	0.527496	0.430945	0.365877	0.418246	0.404324	0.536249	0.362887	0.422002	0.37181	0.356071	0.401953	0.398389	0.405429	0.421089	0.413619	0.405452	0.324244	0.406731	0.462838	0.297348	0.236108	0.187171	0.118142	0.238984	0.216833	0.152456	0.337204	0.498238	0.376078	0.303724	0.0380943				0.113131	0.294465	0.116775	0.102603	0.206589	0.195012	0.22087	0.233208	0.357771	0.376581	0.366742
377	0.672733	0.650354	0.821536	0.684437	0.680968	0.573659	0.522798	0.589316	0.554584	0.686947	0.53265	0.599525	0.529598	0.515661	0.581193	0.58658	0.581781	0.609703	0.617455	0.610225	0.515371	0.615629	0.677897	0.484766	0.418208	0.387914	0.331548	0.423062	0.418831	0.36158	0.545377	0.704183	0.577643	0.510434	0.187528				0.271685	0.0779303	0.08735	0.335327	0.455562	0.430239	0.446729	0.469697	0.608426	0.626317	0.601522
386	0.517262	0.481001	0.658752	0.531586	0.528091	0.418648	0.370592	0.446073	0.399	0.531569	0.383514	0.45844	0.387698	0.37943	0.454868	0.456054	0.444975	0.479984	0.497941	0.472062	0.385962	0.494216	0.573192	0.399003	0.343665	0.327653	0.250307	0.361635	0.344977	0.315971	0.472556	0.606538	0.534407	0.465526	0.0571008				0.40574	0.0382375	0.135054	0.292528	0.413313	0.437676	0.442569	0.442163	0.588091	0.597039	0.571218
387	0.541489	0.505958	0.674475	0.537064	0.53952	0.426887	0.359186	0.433407	0.383029	0.502799	0.336028	0.414996	0.345535	0.320747	0.384399	0.38664	0.365242	0.382506	0.392637	0.353467	0.261434	0.354478	0.432193	0.265644	0.204534	0.179557	0.0784524	0.198985	0.173175	0.141226	0.270748	0.400632	0.341003	0.259882	0.183323				0.248862	0.223109	0.0452484	0.0735212	0.192559	0.249021	0.258443	0.250123	0.398345	0.409058	0.394069
388	0.60075	0.580669	0.744799	0.60022	0.598263	0.476978	0.411434	0.481597	0.478443	0.576892	0.418958	0.490275	0.429534	0.405777	0.475455	0.441485	0.410954	0.43768	0.455523	0.393886	0.309878	0.412889	0.483227	0.324611	0.279251	0.255472	0.14229	0.264507	0.223775	0.201139	0.319018	0.430777	0.393395	0.303219	0.156358				0.293401	0.191119	0.00613751	0.114015	0.228402	0.285983	0.303798	0.290449	0.442582	0.4631	0.455581
389	0.599761	0.575094	0.749057	0.617894	0.611693	0.498551	0.454419	0.522388	0.517469	0.642424	0.506988	0.567916	0.505566	0.503873	0.58744	0.547313	0.52771	0.576975	0.605245	0.562736	0.483615	0.606758	0.666731	0.497341	0.472757	0.456817	0.371439	0.48626	0.433372	0.423104	0.574537	0.666985	0.636508	0.5516	0.12302				0.516212	0.0265601	0.239028	0.3692	0.474713	0.499848	0.51937	0.510041	0.661439	0.68657	0.675352
390	0.46749	0.439565	0.62817	0.493416	0.488231	0.400502	0.354333	0.41129	0.375388	0.537917	0.388571	0.442656	0.392626	0.404247	0.469808	0.450445	0.459967	0.503141	0.513364	0.498524	0.435012	0.542437	0.598048	0.451219	0.431479	0.402183	0.331652	0.470439	0.406794	0.391111	0.567056	0.662733	0.625109	0.548349	0.136781				0.546033	0.0207445	0.230159	0.350992	0.438223	0.460157	0.481529	0.467751	0.595811	0.614169	0.609292
391	0.460635	0.440166	0.631987	0.493637	0.486369	0.395673	0.34939	0.406829	0.399998	0.547617	0.40053	0.455954	0.418091	0.42935	0.497338	0.456937	0.460459	0.50469	0.519517	0.480979	0.428774	0.535363	0.59485	0.47204	0.459095	0.430731	0.338765	0.488156	0.41365	0.40788	0.554147	0.637667	0.627328	0.54349	0.0963808				0.594756	0.0484906	0.263228	0.343886	0.427295	0.474215	0.498254	0.473011	0.599473	0.619867	0.622757
392	0.385781	0.382167	0.564353	0.420917	0.412248	0.316366	0.274908	0.326298	0.366732	0.501292	0.369187	0.41421	0.383874	0.400148	0.477499	0.408088	0.408945	0.467373	0.495513	0.454378	0.407726	0.529824	0.581971	0.459088	0.463446	0.442999	0.365753	0.506457	0.418823	0.429746	0.592174	0.654633	0.658719	0.582667	0.148672				0.633596	0.0861746	0.306871	0.399417	0.483808	0.502025	0.521338	0.499773	0.632108	0.653153	0.649573
393	0.620016	0.600143	0.775999	0.641551	0.635673	0.538713	0.496444	0.546931	0.551252	0.700902	0.571012	0.609314	0.557644	0.570694	0.649829	0.585227	0.574434	0.634437	0.660175	0.626754	0.559248	0.687201	0.712534	0.551338	0.565256	0.540121	0.465123	0.587177	0.49233	0.494211	0.660805	0.712661	0.713851	0.617267	0.206255				0.603458	0.0626889	0.311438	0.419514	0.493882	0.50859	0.545739	0.52739	0.66807	0.709778	0.717807
394	0.535435	0.504523	0.689801	0.558601	0.553855	0.466866	0.422776	0.473805	0.449792	0.618594	0.481972	0.523045	0.474438	0.493212	0.567732	0.515591	0.512438	0.569503	0.590913	0.5623	0.501095	0.622066	0.651245	0.505789	0.522838	0.495897	0.417897	0.553162	0.449742	0.457247	0.615833	0.660788	0.67612	0.5804	0.154468				0.628318	0.0615595	0.30498	0.378656	0.44541	0.480835	0.515474	0.487834	0.619598	0.656221	0.668667
395	0.371009	0.347789	0.508702	0.368976	0.366824	0.263429	0.209597	0.25499	0.272122	0.415909	0.289447	0.318846	0.272298	0.289938	0.373702	0.276271	0.26014	0.331927	0.368187	0.316726	0.270083	0.406781	0.425529	0.295916	0.34084	0.328631	0.256773	0.386602	0.263462	0.304153	0.458672	0.466709	0.52412	0.440838	0.00903675				0.569041	0.0102394	0.227196	0.272203	0.343097	0.367485	0.384954	0.351948	0.49406	0.525984	0.526047
396	0.349193	0.356202	0.497986	0.33126	0.335345	0.242091	0.168491	0.190428	0.244779	0.383585	0.23701	0.247724	0.221353	0.229565	0.286009	0.183838	0.186095	0.239694	0.255717	0.231182	0.186603	0.303731	0.300154	0.178645	0.223479	0.18749	0.13656	0.272825	0.133709	0.158777	0.353767	0.365318	0.394817	0.317397	0.0692385				0.387029	0.194372	0.0492157	0.136456	0.197036	0.177295	0.202775	0.181204	0.309928	0.344449	0.350407
397	0.319403	0.31205	0.443211	0.283933	0.295087	0.207555	0.129368	0.148171	0.168874	0.327271	0.181724	0.185058	0.150564	0.160556	0.213241	0.122748	0.129483	0.183046	0.197614	0.197417	0.147039	0.265876	0.243455	0.113488	0.172245	0.137666	0.115116	0.239463	0.0840902	0.120522	0.338612	0.325513	0.364426	0.294167	0.0606741				0.379436	0.208008	0.0364941	0.125777	0.179315	0.136795	0.157207	0.138807	0.267843	0.303084	0.30462
398	0.306352	0.300049	0.449769	0.302043	0.305742	0.229585	0.172778	0.190177	0.233264	0.402004	0.28368	0.282295	0.260978	0.293327	0.364664	0.248551	0.256544	0.332762	0.366509	0.349548	0.317858	0.451542	0.433768	0.32606	0.404188	0.385426	0.353211	0.475947	0.310845	0.369543	0.556868	0.521095	0.597901	0.522048	0.138962				0.659264	0.0571366	0.310507	0.356639	0.402587	0.385982	0.409641	0.380043	0.504571	0.54107	0.550571
399	0.138729	0.152808	0.297525	0.145659	0.142784	0.0612114	0.0151779	0.0309506	0.131271	0.276358	0.17599	0.173342	0.164598	0.201967	0.28544	0.150931	0.159775	0.246446	0.295867	0.271272	0.248134	0.393321	0.393978	0.295277	0.370197	0.36527	0.338372	0.457137	0.29926	0.371664	0.562854	0.525839	0.60795	0.546194	0.154864				0.697308	0.107514	0.349666	0.4043	0.465055	0.43294	0.442057	0.41661	0.550076	0.576967	0.569899
400	0.0735718	0.0972692	0.225372	0.0624819	0.0685263	0.00203624	0.0626311	0.0603287	0.0352886	0.190688	0.076254	0.0623625	0.0602368	0.0921433	0.156532	0.0370992	0.0611177	0.134857	0.170954	0.179891	0.152597	0.287308	0.27112	0.170348	0.246833	0.2312	0.235695	0.350337	0.180905	0.250353	0.481119	0.437857	0.50405	0.454385	0.109945				0.578115	0.00654971	0.232343	0.319609	0.374902	0.298284	0.304528	0.290379	0.416599	0.441274	0.429764
401	0.428616	0.42313	0.524356	0.368305	0.379506	0.29067	0.212079	0.212455	0.258099	0.404721	0.283262	0.255817	0.220223	0.233505	0.286187	0.152771	0.150791	0.214503	0.231193	0.225147	0.182183	0.307265	0.237752	0.113534	0.207915	0.173087	0.15895	0.263884	0.0804929	0.130436	0.34281	0.289215	0.358813	0.277372	0.0444227				0.356156	0.230864	0.0397224	0.115133	0.145748	0.0851753	0.119575	0.0975936	0.220482	0.27908	0.293793
402	0.382012	0.377292	0.465503	0.302726	0.315236	0.21925	0.129663	0.122488	0.189359	0.32112	0.200173	0.162474	0.135249	0.148108	0.198541	0.0338074	0.0299678	0.0962492	0.113548	0.0894292	0.0640428	0.186061	0.113312	0.0192117	0.126233	0.0953095	0.0694069	0.182209	0.0124069	0.0532776	0.242169	0.172605	0.270282	0.190605	0.157911				0.341137	0.261553	0.00253453	0.0350978	0.0662067	0.0295567	0.0565249	0.0242396	0.145465	0.197893	0.213209
407	0.354532	0.391945	0.533532	0.345268	0.344276	0.253902	0.171545	0.169318	0.330242	0.427079	0.29128	0.276035	0.297665	0.313904	0.363762	0.168997	0.167333	0.234891	0.252514	0.165701	0.180826	0.288055	0.270332	0.234869	0.319022	0.284654	0.191193	0.348275	0.181406	0.233392	0.354019	0.327181	0.428802	0.339464	0.100966				0.541988	0.0789787	0.173103	0.156334	0.196997	0.236961	0.269138	0.218353	0.326718	0.363554	0.391335
408	0.396652	0.413557	0.561496	0.383784	0.386885	0.294331	0.211552	0.225078	0.32167	0.44168	0.291382	0.294096	0.291786	0.300879	0.351474	0.200922	0.197355	0.25458	0.267072	0.197922	0.187701	0.295346	0.284771	0.21617	0.282235	0.243868	0.155407	0.311831	0.156911	0.19444	0.333436	0.326864	0.401481	0.311397	0.121912				0.473891	0.13821	0.110403	0.121644	0.169128	0.202363	0.23418	0.190222	0.30571	0.3425	0.365893
409	0.272492	0.29181	0.442367	0.267136	0.260159	0.151363	0.0802442	0.107953	0.220915	0.313904	0.175417	0.193761	0.186735	0.196098	0.261863	0.116303	0.10384	0.167299	0.195377	0.1102	0.097643	0.215413	0.240829	0.16926	0.214442	0.192049	0.0961336	0.248963	0.11871	0.160389	0.28812	0.298289	0.36731	0.287535	0.173331				0.46198	0.13256	0.0973194	0.11374	0.183642	0.223672	0.241125	0.200794	0.329007	0.35322	0.360394
410	0.298215	0.308862	0.467283	0.299108	0.289131	0.170608	0.10336	0.141701	0.262576	0.335307	0.205442	0.232227	0.227454	0.236161	0.309748	0.148539	0.121361	0.191467	0.227181	0.11001	0.110683	0.229893	0.264873	0.213371	0.261988	0.248608	0.13169	0.285212	0.160075	0.210955	0.299845	0.303253	0.397263	0.31338	0.176361				0.538694	0.0573392	0.168368	0.145434	0.216288	0.288631	0.304296	0.253446	0.381268	0.404497	0.413725
411	0.35359	0.356969	0.536218	0.363308	0.362388	0.280053	0.198838	0.224491	0.291373	0.423159	0.257054	0.278483	0.288668	0.30001	0.344143	0.210645	0.211943	0.2616	0.26625	0.174876	0.183624	0.277924	0.292098	0.255229	0.308451	0.270052	0.156039	0.331604	0.192245	0.226264	0.328462	0.338855	0.420295	0.329809	0.138321				0.546466	0.0682292	0.163227	0.137128	0.187426	0.262335	0.290033	0.234979	0.341894	0.368629	0.393015
412	0.363709	0.346477	0.524508	0.372084	0.369995	0.270996	0.202778	0.253178	0.275024	0.402764	0.247582	0.294073	0.269757	0.275485	0.339796	0.250259	0.237078	0.28597	0.304401	0.222169	0.197359	0.304417	0.347996	0.268737	0.291805	0.267295	0.155295	0.317112	0.207064	0.234538	0.342155	0.3767	0.433924	0.347786	0.131526				0.533653	0.0559107	0.162274	0.163274	0.235166	0.309856	0.328148	0.282671	0.407267	0.427894	0.437525
413	0.372837	0.373204	0.567202	0.409241	0.396939	0.30321	0.24453	0.293228	0.358358	0.463154	0.311842	0.360002	0.359528	0.367272	0.424661	0.322277	0.314676	0.359989	0.373403	0.271088	0.264633	0.361429	0.416312	0.364226	0.379217	0.350509	0.217071	0.389035	0.293279	0.310428	0.392237	0.445105	0.499013	0.408409	0.0900041				0.591712	0.00828538	0.224697	0.215992	0.287646	0.380548	0.404455	0.353345	0.469636	0.49068	0.505587
414	0.409333	0.404666	0.59984	0.428192	0.417807	0.333174	0.249817	0.288225	0.328238	0.435798	0.25516	0.29489	0.300013	0.300988	0.333575	0.217097	0.207768	0.243611	0.233973	0.100739	0.117242	0.199486	0.239642	0.212781	0.241122	0.204074	0.0478938	0.23369	0.136709	0.151734	0.203255	0.253542	0.326524	0.228956	0.277951				0.462794	0.129619	0.0833726	0.0353665	0.0984709	0.218289	0.243761	0.179898	0.288922	0.312329	0.333676
415	0.514567	0.451872	0.624054	0.505467	0.512819	0.386625	0.31272	0.407754	0.351552	0.448566	0.294452	0.389022	0.321219	0.294023	0.380985	0.336475	0.267276	0.30279	0.338611	0.207431	0.150453	0.263965	0.344507	0.24388	0.235943	0.239867	0.0880501	0.226767	0.154935	0.192206	0.224654	0.265342	0.34704	0.25504	0.284768				0.509937	0.0483258	0.143621	0.0958897	0.194152	0.328966	0.332876	0.280738	0.426576	0.440361	0.439602
416	0.429074	0.384204	0.58291	0.45974	0.452849	0.352342	0.302161	0.382465	0.345627	0.469494	0.320596	0.403607	0.363224	0.363608	0.436725	0.407223	0.390125	0.423261	0.442694	0.355136	0.315059	0.41085	0.501157	0.419581	0.392947	0.378673	0.242465	0.401312	0.341402	0.35081	0.416661	0.496851	0.529815	0.443032	0.0759021				0.628279	0.0748584	0.265308	0.259039	0.350804	0.467499	0.480004	0.434508	0.560155	0.570164	0.57274
422	0.486875	0.493824	0.64494	0.502005	0.487313	0.340906	0.295611	0.366617	0.480831	0.514912	0.405297	0.463733	0.425542	0.415458	0.513708	0.390418	0.336524	0.401086	0.453744	0.33279	0.286532	0.420946	0.490943	0.378051	0.37961	0.381157	0.250281	0.376213	0.303814	0.332499	0.413099	0.464295	0.512903	0.42392	0.0872908				0.542538	0.0103336	0.226275	0.261579	0.368719	0.441057	0.453181	0.418075	0.575595	0.600746	0.593562
423	0.352577	0.381129	0.526502	0.367003	0.348227	0.21378	0.16622	0.218114	0.35715	0.400175	0.286126	0.32715	0.301741	0.299305	0.386419	0.254395	0.218895	0.283263	0.327769	0.225333	0.186238	0.317263	0.37628	0.267043	0.274769	0.266449	0.152307	0.284821	0.203516	0.227043	0.339439	0.393917	0.427099	0.344876	0.137034				0.43028	0.103307	0.115215	0.179415	0.281134	0.322184	0.33572	0.306793	0.457933	0.482911	0.47494
424	0.462857	0.494297	0.661265	0.497038	0.483517	0.378117	0.328928	0.36998	0.482479	0.570808	0.436885	0.473169	0.458862	0.463242	0.531889	0.426854	0.418658	0.471142	0.494999	0.427156	0.387989	0.503019	0.549513	0.439153	0.442606	0.413096	0.312644	0.457486	0.37164	0.372155	0.515048	0.587209	0.587628	0.5017	0.0558674				0.520747	0.0162433	0.212155	0.308836	0.39426	0.417363	0.446417	0.423508	0.555967	0.585179	0.5899
425	0.469582	0.488093	0.650427	0.490196	0.479206	0.367549	0.31448	0.35756	0.456896	0.547005	0.415119	0.449867	0.42734	0.430692	0.504312	0.390308	0.372183	0.429724	0.457738	0.380597	0.340933	0.461891	0.500018	0.387566	0.403779	0.379153	0.274759	0.416738	0.320293	0.332557	0.465065	0.517531	0.541615	0.451111	0.00452715				0.511659	0.0413356	0.193319	0.263227	0.344968	0.379784	0.407602	0.378029	0.515446	0.548352	0.554528
426	0.370434	0.405468	0.554224	0.390397	0.374881	0.258822	0.211843	0.246666	0.395337	0.466346	0.353788	0.375287	0.362298	0.372521	0.453681	0.306886	0.286365	0.357348	0.397054	0.311893	0.283895	0.4156	0.447205	0.346565	0.381004	0.364388	0.266954	0.404667	0.293896	0.324725	0.45949	0.488295	0.535743	0.450516	0.00427323				0.539686	0.0223334	0.217018	0.276956	0.356731	0.379221	0.402561	0.37099	0.510719	0.544207	0.546954
427	0.360804	0.402748	0.553933	0.390566	0.376437	0.269929	0.227294	0.259025	0.406967	0.491638	0.379058	0.39883	0.3884	0.402321	0.48161	0.347909	0.338451	0.407927	0.445868	0.38194	0.348598	0.480593	0.511248	0.400948	0.430561	0.410558	0.33012	0.464741	0.355753	0.380212	0.541131	0.577881	0.605252	0.525731	0.0968001				0.56705	0.0179157	0.257081	0.351874	0.431766	0.427023	0.451341	0.429066	0.566361	0.599148	0.598762
428	0.532978	0.549683	0.700463	0.546741	0.536587	0.425159	0.378824	0.416258	0.51235	0.614848	0.496979	0.518905	0.484764	0.494132	0.575496	0.456237	0.43777	0.506194	0.540017	0.480866	0.430214	0.565761	0.582877	0.442246	0.472203	0.450271	0.369606	0.492982	0.387377	0.402876	0.565548	0.60368	0.623491	0.532134	0.116782				0.533183	0.005553	0.245034	0.351058	0.428273	0.425406	0.457829	0.437646	0.582144	0.626218	0.629553
429	0.393356	0.382684	0.537653	0.418637	0.401096	0.275109	0.259829	0.31605	0.406427	0.507733	0.438	0.465077	0.412082	0.441214	0.564481	0.424637	0.387252	0.492659	0.564071	0.484037	0.437638	0.612209	0.639681	0.490985	0.545041	0.562356	0.486803	0.588708	0.483229	0.542026	0.684229	0.684965	0.759795	0.675906	0.23521				0.771585	0.230487	0.476661	0.538775	0.626356	0.636226	0.647237	0.616367	0.783289	0.824898	0.80767
430	0.445384	0.492759	0.628362	0.461717	0.449808	0.349036	0.302688	0.317581	0.480862	0.570089	0.465931	0.462893	0.454897	0.473471	0.549436	0.388491	0.378524	0.454919	0.49099	0.429394	0.401724	0.537189	0.534315	0.425601	0.48368	0.459214	0.386399	0.515559	0.379903	0.413175	0.57997	0.585893	0.635097	0.546554	0.138785				0.589233	0.0220544	0.285046	0.368991	0.429787	0.41318	0.449048	0.423319	0.555893	0.603266	0.614621
431	0.414521	0.454027	0.575936	0.40117	0.391548	0.284909	0.224163	0.23562	0.369506	0.464286	0.343716	0.337923	0.316507	0.325629	0.392016	0.245075	0.235205	0.301767	0.327334	0.278787	0.237476	0.368247	0.356665	0.227308	0.27716	0.244712	0.182052	0.305713	0.17428	0.194901	0.38288	0.399547	0.424797	0.338076	0.0415054				0.330254	0.217619	0.0425298	0.160628	0.224416	0.185394	0.221418	0.205016	0.34137	0.391672	0.398852
432	0.347312	0.358944	0.475966	0.315923	0.308042	0.194668	0.135818	0.153655	0.246258	0.354932	0.243074	0.236603	0.195618	0.208649	0.28536	0.141665	0.125011	0.20155	0.234454	0.188156	0.141693	0.285725	0.266105	0.121809	0.184548	0.165095	0.11351	0.224477	0.0908856	0.127331	0.31758	0.315726	0.360758	0.277831	0.094354				0.309745	0.237428	0.0194373	0.122651	0.188687	0.148361	0.172742	0.152457	0.301152	0.353131	0.348158
433	0.494087	0.52404	0.639856	0.479931	0.469893	0.367884	0.317705	0.32265	0.458601	0.56092	0.465881	0.443448	0.418918	0.440913	0.517164	0.343801	0.329517	0.413361	0.447509	0.393328	0.361751	0.505172	0.468027	0.343754	0.426027	0.402406	0.344329	0.458155	0.30643	0.347358	0.525273	0.50536	0.569348	0.475392	0.102089				0.509468	0.0565356	0.221923	0.305863	0.353223	0.318215	0.35915	0.332934	0.46785	0.530422	0.544141
434	0.395882	0.461206	0.58044	0.408226	0.404021	0.324562	0.274719	0.270037	0.450272	0.556082	0.456405	0.433879	0.439958	0.464581	0.530363	0.370226	0.377469	0.451958	0.485262	0.458431	0.432781	0.565401	0.539714	0.43525	0.507809	0.477305	0.442014	0.562165	0.402041	0.442826	0.649638	0.631792	0.678716	0.601064	0.247354				0.615245	0.0483285	0.31852	0.430983	0.477373	0.408345	0.447298	0.433415	0.553444	0.602386	0.615763
435	0.473029	0.516819	0.639163	0.477831	0.474339	0.392103	0.34519	0.347148	0.481808	0.605488	0.505261	0.485544	0.47233	0.497351	0.566432	0.424284	0.42924	0.505602	0.536994	0.520746	0.482332	0.621026	0.587872	0.457066	0.52787	0.498968	0.474331	0.581956	0.430275	0.464583	0.684385	0.671351	0.705497	0.626074	0.299443				0.594285	0.049728	0.322506	0.460619	0.50711	0.422336	0.463225	0.455387	0.580954	0.636794	0.645667
436	0.345516	0.352329	0.461564	0.318503	0.306422	0.20627	0.165681	0.172177	0.265372	0.390096	0.31053	0.281337	0.238654	0.270635	0.356388	0.195324	0.183743	0.280149	0.321509	0.286073	0.247618	0.4091	0.360543	0.211826	0.306247	0.298577	0.270487	0.361395	0.214251	0.269846	0.471268	0.43659	0.507947	0.42527	0.0934633				0.456179	0.0803529	0.191755	0.293156	0.343946	0.275701	0.301471	0.279456	0.428311	0.495384	0.486448
437	0.528839	0.574156	0.665377	0.499546	0.493822	0.407085	0.351172	0.334554	0.488271	0.594214	0.504458	0.458349	0.444538	0.468059	0.53027	0.350017	0.346443	0.425352	0.45189	0.421954	0.392882	0.529143	0.462544	0.344197	0.440722	0.407235	0.37588	0.479964	0.305563	0.347943	0.552846	0.511322	0.57296	0.48226	0.161324				0.476313	0.0841936	0.206478	0.313763	0.342847	0.263626	0.31484	0.298713	0.418258	0.48915	0.511669
444	0.240544	0.232713	0.307108	0.156709	0.175747	0.103257	0.0201169	0.00199887	0.0591665	0.212084	0.111027	0.0595376	0.0440839	0.0678633	0.115742	0.0308969	0.0189679	0.0495836	0.0756802	0.0922576	0.0684597	0.193949	0.107156	0.0220329	0.144341	0.12665	0.148904	0.235642	0.0225452	0.115705	0.328837	0.220025	0.337231	0.276541	0.0246279				0.455136	0.135799	0.121724	0.154875	0.178751	0.10164	0.116014	0.0922211	0.20839	0.255717	0.259549
445	0.24483	0.215033	0.269007	0.124784	0.139563	0.052658	0.0372432	0.0620726	0.0123629	0.126589	0.0376479	0.0323569	0.0537683	0.0275448	0.021932	0.161103	0.156716	0.0803656	0.0533479	0.0597727	0.0676242	0.0599393	0.0397638	0.103294	0.037693	0.0299441	0.0367626	0.121493	0.0965335	0.0132581	0.19257	0.0655475	0.216861	0.152325	0.169874				0.396686	0.196281	0.0582912	0.0430299	0.0666986	0.0218593	0.0294121	0.00845003	0.112611	0.162403	0.164177
446	0.0726711	0.0729094	0.0297224	0.178621	0.166925	0.231702	0.308853	0.349087	0.230961	0.0994134	0.160782	0.236813	0.225486	0.185854	0.124515	0.308302	0.292773	0.205758	0.152319	0.145623	0.144884	0.00451127	0.080061	0.129525	0.0125547	0.0281948	0.0564437	0.127317	0.0909604	0.0476788	0.232549	0.0853338	0.256641	0.212301	0.108704				0.496195	0.0814999	0.159995	0.140642	0.176072	0.111633	0.0987803	0.06543	0.195303	0.232478	0.212661
447	0.0197435	0.0288747	0.0245272	0.111999	0.0997952	0.158526	0.225694	0.258964	0.182279	0.0311326	0.0927876	0.166793	0.171569	0.129589	0.0713668	0.233382	0.215342	0.127634	0.083831	0.0618815	0.0696749	0.0744789	0.0193452	0.0918693	0.0548282	0.0665611	0.109418	0.172191	0.0399356	0.0890767	0.294377	0.152405	0.311244	0.264324	0.0163749				0.504531	0.0554563	0.192581	0.197522	0.223288	0.134183	0.126009	0.0955065	0.223	0.272884	0.250631
448	0.299274	0.301764	0.350196	0.209632	0.257128	0.221598	0.128407	0.0972444	0.160954	0.322789	0.234567	0.175079	0.189236	0.20858	0.238227	0.121253	0.143694	0.192093	0.223336	0.286524	0.265033	0.366546	0.258633	0.212874	0.346201	0.328474	0.395832	0.457061	0.203836	0.322367	0.540441	0.377426	0.516878	0.47134	0.219529				0.686448	0.0938171	0.34742	0.359461	0.359827	0.253809	0.270889	0.260427	0.343836	0.378601	0.399363
449	0.221976	0.21585	0.271497	0.154136	0.176875	0.14994	0.0935514	0.0522658	0.134	0.293939	0.263153	0.177189	0.186611	0.240936	0.299989	0.125704	0.142146	0.233149	0.281221	0.295486	0.304529	0.438605	0.320923	0.279351	0.447807	0.458049	0.48766	0.546486	0.316926	0.449704	0.617444	0.452783	0.635864	0.573681	0.296927				0.828496	0.252304	0.519038	0.481904	0.478084	0.417253	0.433916	0.395297	0.49322	0.551678	0.564382
450	0.346605	0.357748	0.386597	0.254084	0.280844	0.243278	0.17069	0.120995	0.231005	0.363768	0.315849	0.225236	0.236598	0.270824	0.310633	0.136703	0.149546	0.219653	0.252278	0.276861	0.274936	0.38957	0.262885	0.219572	0.374792	0.361838	0.399572	0.461996	0.220078	0.33494	0.526892	0.366174	0.52193	0.460408	0.209599				0.656615	0.0818876	0.353992	0.352408	0.342645	0.247212	0.275635	0.252284	0.336406	0.394625	0.419758
451	0.428567	0.386913	0.424433	0.316502	0.318259	0.267536	0.212845	0.166139	0.180985	0.335813	0.298384	0.189391	0.157242	0.202638	0.242749	0.0631631	0.0687142	0.154018	0.167331	0.178734	0.176551	0.303981	0.135366	0.0618063	0.238683	0.22661	0.256118	0.307392	0.0840204	0.185516	0.368564	0.21528	0.374997	0.294532	0.0813913				0.460239	0.0848347	0.201321	0.194643	0.167954	0.0787055	0.116204	0.0787744	0.166042	0.258864	0.282045
452	0.434619	0.384945	0.415901	0.318801	0.329385	0.293477	0.236813	0.187266	0.186871	0.347206	0.319274	0.205349	0.18278	0.230514	0.264184	0.0918667	0.10108	0.181218	0.195629	0.215664	0.223055	0.340071	0.164687	0.118368	0.30401	0.297127	0.333088	0.378981	0.144207	0.260521	0.42682	0.252167	0.432986	0.357865	0.145975				0.577985	0.0272298	0.305602	0.263941	0.230413	0.155525	0.188692	0.147511	0.223223	0.307114	0.335412
[truncated: 241 more columns]
