# Supplementary material for: A CLC-ec1 mutant reveals global conformational change and suggests a unifying mechanism for the CLC Cl–/H+ transport cycle
Source: eLife. 2020 Apr 20;9:e53479. doi: 10.7554/eLife.53479 (PMC7253180; doi:10.7554/eLife.53479)
Supplement: Figure 5—source data 2. [file elife-53479-fig5-data2.xlsx]

## Sheet: Sheet1
Source data for Figure 5 - comparison of Repeats (RMSD values)
	WT Repeat 1	WT repeat 2	QQQ Repeat 1	QQQ Repeat 2
WT repeat 1	-	-	-	-
WT Repeat 2	2.55 Å	-	-	-
QQQ Repeat 1	0.75 Å	2.60 Å	-	-
QQQ repeat 2	2.80 Å	0.69 Å	2.77 Å	-
