# Supplementary material for: A CLC-ec1 mutant reveals global conformational change and suggests a unifying mechanism for the CLC Cl–/H+ transport cycle
Source: eLife. 2020 Apr 20;9:e53479. doi: 10.7554/eLife.53479 (PMC7253180; doi:10.7554/eLife.53479)
Supplement: Figure 7—figure supplement 2—source data 1. [file elife-53479-fig7-figsupp2-data1.xlsx]

## Sheet: Sheet1
Source Data for Figure 7 - figure supplement 2
WT background
171 WT, unlabeled	Sample	replicate 1	replicate 2	average of replicates		171 WT, labeled	Sample	replicate 1	replicate 2	average of replicates
	1	670.523	excluded	670.523			1	728.409	771.491	749.95
	2	677.357	647.17	662.264			2	721.082	591.408	656.245
			average of samples	666.393					average of samples	703.098
373 WT, unlabeled	Sample	replicate 1	replicate 2	average of replicates		373 WT, labeled	Sample	replicate 1	replicate 2	average of replicates
	1	1694.63	1659.53	1677.08			1	1522.47	1420.98	1471.73
	2	1731.82	1571.23	1651.52			2	1629.56	1601.27	1615.41
			average of samples	1664.3					average of samples	1543.57
374 WT, unlabeled	Sample	replicate 1	replicate 2	average of replicates		374 WT, labeled	Sample	replicate 1	replicate 2	average of replicates
	1	1687.4	1605.45	1646.42			1	1340.15	1422.8	1381.48
	2	1641.1	1565.63	1603.37			2	1288.51	1302.08	1295.3
			average of samples	1624.9					average of samples	1338.39
385 WT, unlabeled	Sample	replicate 1	replicate 2	average of replicates		374 WT, labeled	Sample	replicate 1	replicate 2	average of replicates
	1	1336.84	1316.5	1326.67			1	1361.07	1391.19	1376.13
	2	1355.72	1265.21	1310.46			2	1369.89	1367.3	1368.6
			average of samples	1318.57					average of samples	1372.36
417 WT, unlabeled	Sample	replicate 1	replicate 2	average of replicates		417 WT, labeled	Sample	replicate 1	replicate 2	average of replicates
	1	1112.44	1138.26	1125.35			1	1344.27	1223.53	1283.9
	2	1077.23		1077.23			2	1421.81	1423.33	1422.57
			average of samples	1101.29					average of samples	1353.24
QQQ background
171 QQQ, unlabeled	Sample	replicate 1	replicate 2	average of replicates		171 QQQ, labeled	Sample	replicate 1	replicate 2	average of replicates
	1	508.813	498.512	503.663			1	376.039	392.249	384.144
	2	561.339	529.639	545.489			2	443.276	438.565	440.921
			average of samples	524.576					average of samples	412.532
373 QQQ, unlabeled	Sample	replicate 1	replicate 2	average of replicates		373 QQQ, labeled	Sample	replicate 1	replicate 2	average of replicates
	1	272.151	269.979	271.065			1	199.357	197.156	198.257
	2	264.094	271.748	267.921			2	197.225	200.389	198.807
			average of samples	269.493					average of samples	198.532
374 QQQ, unlabeled	Sample	replicate 1	replicate 2	average of replicates		374 QQQ, labeled	Sample	replicate 1	replicate 2	average of replicates
	1	381.82	428.509	405.164			1	306.851	273.127	289.989
	2	355.959	382.151	369.055			2	301.441	299.596	300.518
			average of samples	387.11					average of samples	295.254
385 QQQ, unlabeled	Sample	replicate 1	replicate 2	average of replicates		374 QQQ, labeled	Sample	replicate 1	replicate 2	average of replicates
	1	352.343	351.099	351.721			1	333.309	324.355	328.832
	2	342.564	345.181	343.872			2	327.826	326.447	327.136
			average of samples	347.797					average of samples	327.984
417 QQQ, unlabeled	Sample	replicate 1	replicate 2	average of replicates		417 QQQ, labeled	Sample	replicate 1	replicate 2	average of replicates
	1	269.226	275.638	272.432			1	376.661	342.499	359.58
	2	301.502	321.451	311.477
			average of samples	291.955					average of samples	359.58
