# Supplementary material for: A CLC-ec1 mutant reveals global conformational change and suggests a unifying mechanism for the CLC Cl–/H+ transport cycle
Source: eLife. 2020 Apr 20;9:e53479. doi: 10.7554/eLife.53479 (PMC7253180; doi:10.7554/eLife.53479)
Supplement: Figure 9—source data 1. [file elife-53479-fig9-data1.xlsx]

## Sheet: Sheet1
Source Data for Figure 9
WT		H+ turnover (s-1)				Cl- turnover (s-1)				Averages
	Sample	replicate 1	replicate 2			replicate 1	replicate 2			H (s-1)	Cl (s-1)
	1	1105.34	1201.74			2727.88	2872.8			1153.54	2800.34
	2	1073.74	1263.84			2645.63	2696.46			1168.79	2671.04
	3	984.266	946.301			1977.87	2045.06			965.284	2011.47
	4	1043.52	999.016			2008.36	2132.04			1021.27	2070.2
	5	1352	1495.89			2148.35	2185.43			1423.94	2166.89
	6	863.842	867.459			1599.25	1442.02			865.651	1520.63
	7	1092.08	966.004			2537.09	2587.31			1029.04	2562.2
	8	1153.29	1178.5			2577.91	2671.76			1165.9	2624.84
	9	863.771	1118.23			2181.86	2194.84			991	2188.35
	10	913.201	1088.5			2383.23	2337.5			1000.85	2360.37
									Average of samples	1078.53	2297.63
									± SEM	49.248	121.999
E148Q		H+ turnover (s-1)				Cl- turnover (s-1)				Averages
	Sample	replicate 1	replicate 2	replicate 3	replicate 4	replicate 1	replicate 2	replicate 3	replicate 4	H (s-1)	Cl (s-1)
	1	3.08939	2.89469	1.17265	1.67282	235.084	238.814	146.08	151.981	2.20739	192.99
	2	0.775206	2.50376	2.21627	2.54264	193.062	197.536	220.587	217.105	2.00947	207.073
	3	1.4755	1.72337			151.818	171.901			1.59944	161.86
	4	1.34371	1.05184			139.409	150.814			1.19777	145.111
	5	1.31839	1.93634			142.086	213.129			1.62737	177.607
	6	0.0979476	1.05202			91.961	114.714			0.574984	103.338
	7	2.18159	1.96238			178.877	225.012			2.07198	201.945
	8	2.37107	2.06153			217.86	248.484			2.2163	233.172
									Average of samples	1.68809	177.887
									± SEM	0.202233	14.3949
E203A		H+ turnover (s-1)				Cl- turnover (s-1)				Averages
	Sample	replicate 1	replicate 2			replicate 1	replicate 2			H (s-1)	Cl (s-1)
	1	24.477	23.4559			216.317	268.705			23.9664	242.511
	2	22.5163	22.633			252.975	210.857			22.5746	231.916
	3	15.734	18.0905			185.026	195.585			16.9122	190.306
	4	15.3581	19.3756			209.77	203.864			17.3669	206.817
									Average of samples	20.205	217.887
									± SEM	1.79491	11.8548
E203Q		H+ turnover (s-1)				Cl- turnover (s-1)				Averages
	Sample	replicate 1	replicate 2			replicate 1	replicate 2			H (s-1)	Cl (s-1)
	1	9.23841	8.76949			620.939	749.134			9.00395	685.036
	2	11.0694	9.21221			670.67	726.906			10.1408	698.788
	3	6.23342	8.30546			559.145	618.418			7.26944	588.782
	4	6.82157	10.6846			646.086	723.9			8.75308	684.993
									Average of samples	8.79182	664.4
									± SEM	0.590475	25.4142
E113A/E203A		H+ turnover (s-1)				Cl- turnover (s-1)				Averages
	Sample	replicate 1	replicate 2	replicate 3	replicate 4	replicate 1	replicate 2	replicate 3	replicate 4	H (s-1)	Cl (s-1)
	1	7.09362	13.3501	7.7533	7.97125	247.827	247.22	198.677	202.398	9.04208	224.03
	2	11.1451	11.3051	11.7186	11.778	295.294	307.622	277.247	251.181	11.4867	282.836
	3	7.49113	9.48458			155.112	154.776			8.48785	154.944
	4	9.83659	6.9604			164.731	128.618			8.3985	146.674
	5	8.27788	9.52624			179.835	192.978			8.90206	186.406
	6	6.12173	6.68178			134.302	139.842			6.40175	137.072
									Average of samples	8.78649	188.661
									± SEM	0.665745	22.8664
E113K/E203T		H+ turnover (s-1)				Cl- turnover (s-1)				Averages
	Sample	replicate 1	replicate 2			replicate 1	replicate 2			H (s-1)	Cl (s-1)
	1	8.00036	2.52011			66.0631	65.4945			5.26023	65.7788
	2	5.193	7.73836			84.034	91.6853			6.46568	87.8597
	3	1.77044	2.00117			45.4459	38.6036			1.88581	42.0248
	4	0.174853	2.46035			42.9452	33.8111			1.3176	38.3781
	5	1.53898	1.6958			30.8316	48.2624			1.61739	39.547
	6	0.879809	1.37468			41.8007	42.2546			1.12725	42.0276
									Average of samples	2.94566	52.6027
									± SEM	0.941498	8.19182
